# Supplementary material
Source: publisher figshare collection journal article supplement (https://acs.figshare.com/ndownloader/files/17385011)
Supplement: Supplementary file 1 [file 17385011]

## Sheet: Index
Supplementary Table 1 | N-terminomics TAILS peptides from colon biopsies identified without constraint by enzyme specificity rules during spectrum-to-sequence matching.
Supplementary Table 2 | N-terminomics TAILS peptides significantly elevated from the healthy colon biopsies.
Supplementary Table 3 | N-terminomics TAILS peptides significantly elevated from the ulcerative colitis colon biopsies.
Supplementary Table 4 | Shotgun proteomics peptides from colon biopsies identified without constraint by enzyme specificity rules during spectrum-to-sequence matching.
Supplementary Table 5 | Reactome Pathway of Shotgun proteomics data.
Supplementary Table 6 | Identification of differential proteolytic processing of proteins from N-terminomics.

## Sheet: Supplementary Table 1
Supplementary Table 1 | N-terminomics TAILS peptides from colon biopsies identified without constraint by enzyme specificity rules during spectrum-to-sequence matching.
Peptide sequences were identified from the the human UniProt protein database with appended standard laboratory and common contamination protein entries and reverse decoy sequences (in total 177,324 entries) using the Andromeda algorithm as implemented in the MaxQuant software package v1.6.0.1, using an peptide FDR of 0.01. Search parameters included a mass tolerance of 1 ppm for the parent ion a…
Sequence	Modifications	Mass	Proteins	Gene Names	Protein Names	Ratio UC (H) vs Healthy (L)	Experiment 1	Experiment 2	Experiment 3	Number of peptides detected in Experiment 1	Number of peptides detected in Experiment 2	Number of peptides detected in Experiment 3	Charges	PEP	Andromeda Score	Delta score	Contaminant
GVNEVDYCLYPAR	Unmodified	1554.71	H0Y771;B7ZC34;Q5SXX8;Q9NVF9-3;Q9NVF9;Q9NVF9-2	ETNK2	Ethanolamine kinase 2	0.0040919	NaN	0.0040919	NaN		1		2	0.04343	100.02	39.107
PASELVKEQEHAAGR	Acetyl (N-term)	1662.83	H0Y4J2	MRPL37		0.0061966	0.0084742	NaN	0.0045312	1		1	2	0.040875	90.827	9.2021
SLLNKPKSEMTPEELQKR	Acetyl (N-term)	2169.15	K7ERG4;P62316	SNRPD2	Small nuclear ribonucleoprotein Sm D2	0.033864	0.032973	0.033864	0.11363	1	1	1	3;4	0.0056547	90.561	40.452
VATVSLPR	Unmodified	841.502	CON__P00761			0.034224	0.034224	NaN	NaN	1			2	3.3166e-17	163.34	58.141	+
VCKGDMGGARTLQR	Acetyl (N-term)	1589.78	Q9C0C4	SEMA4C	Semaphorin-4C	0.039438	0.039438	0.031867	0.052553	1	1	1	2	0.0099002	107.55	50.922
KLVSSTSDLPKR	Unmodified	1329.76	P54868-3;P54868-2;P54868	HMGCS2	Hydroxymethylglutaryl-CoA synthase, mitochondrial	0.043552	NaN	NaN	0.043552			1	3	0.043271	104.94	39.217
AAPGSPLDKLVSSTSDLPKR	Unmodified	2038.11	P54868-3;P54868-2;P54868	HMGCS2	Hydroxymethylglutaryl-CoA synthase, mitochondrial	0.046716	0.11646	0.03492	0.046716	1	1	3	4	7.9182e-10	127.32	83.79
SVFLPKDVALARGLIDR	Acetyl (N-term)	1911.09	P15924-2;P15924-3;P15924	DSP	Desmoplakin	0.048575	NaN	NaN	0.048575			1	3	0.20272	67.646	7.8503
EPYTEQMGNCGEKGER	Unmodified	1883.78	A8K7I4	CLCA1	Calcium-activated chloride channel regulator 1	0.048825	0.047972	0.059855	0.048825	1	2	1	3	4.9112e-86	223.7	193.52
LKSEISNIAR	Unmodified	1129.65	A8K7I4	CLCA1	Calcium-activated chloride channel regulator 1	0.05507	0.14398	0.05507	0.054897	1	1	1	3	0.00010057	121.61	74.033
GTFLCKTWAGSQSR	Acetyl (N-term)	1639.78	E9PGN6;Q9UI43	FTSJ2	rRNA methyltransferase 2, mitochondrial	0.055653	0.033218	NaN	0.093242	1		1	2	0.036708	98.044	19.488
TPCSIPDNPTKTSGPKGAMR	Oxidation (M)	2130.02	E9PKF5;E9PMR7;E9PS24	ROM1		0.066204	0.066204	NaN	NaN	1			3	0.038406	71.402	10.861
DLDPNYVLSSR	Unmodified	1277.63	P12277;G3V461;G3V4N7;P06732	CKB;CKM	Creatine kinase B-type;Creatine kinase M-type;Creatine kinase M-type, N-terminally processed	0.072552	0.088381	0.059559	NaN	1	1		2	0.14238	89.171	23.706
KSAPATGGVKKPHR	Unmodified	1432.83	Q71DI3;Q16695;P68431;Q5TEC6	HIST2H3A;HIST3H3;HIST1H3A;HIST2H3PS2	Histone H3.2;Histone H3.1t;Histone H3.1;Histone H3	0.078697	NaN	0.076773	0.085511		1	2	4	0.026595	101.53	58.556
PAEAEKEKVR	Acetyl (N-term)	1197.64	B4DKD2	ADAM11		0.079679	NaN	0.059188	0.10727		1	1	3	0.0058477	151.44	82.784
KQFYPDLIR	Unmodified	1178.64	Q13228-2;Q13228-3;Q13228;Q13228-4	SELENBP1	Selenium-binding protein 1	0.091883	0.091197	NaN	0.092576	1		1	3	0.097778	114.89	56.665
ESMAQYWKRNNK	Oxidation (M);Acetyl (N-term)	1611.75	Q9HCN4;Q9HCN4-5;Q9HCN4-3;Q9HCN4-2;Q9HCN4-4	GPN1	GPN-loop GTPase 1	0.093242	NaN	NaN	0.093242			1	2	0.11949	88.37	9.8571
GLIPLEIR	Unmodified	909.565	Q13228-2;Q13228-3;Q13228;Q13228-4;A6PVX1;H0Y532	SELENBP1	Selenium-binding protein 1	0.094688	0.095113	0.094266	0.081013	1	1	2	2	2.6908e-21	173.93	26.988
GETFEVKGTWER	Unmodified	1437.69	Q13228-2;Q13228-3;Q13228;Q13228-4;A6PVX1;H0Y532	SELENBP1	Selenium-binding protein 1	0.096014	NaN	0.10574	0.08718	1	1	1	3	2.9832e-20	179.6	91.469
TAAVGGVFDVSNADR	Unmodified	1477.72	P12277;H0YJG0	CKB	Creatine kinase B-type	0.10476	0.11465	0.094874	0.10476	1	1	1	2	0	322.77	271.98
ETVVLPLDER	Unmodified	1169.63	Q5VZS7;Q53EL6-2;Q53EL6	PDCD4	Programmed cell death protein 4	0.10829	0.11478	0.10216	NaN	1	1		2	0.071478	84.213	48.594
TNSLFPGTWYLER	Unmodified	1582.78	P54868-3;P54868-2;P54868	HMGCS2	Hydroxymethylglutaryl-CoA synthase, mitochondrial	0.1087	0.1087	NaN	NaN	1			2	0.0089052	146.16	85.645
IGTWEITPCCAVGR	Unmodified	1618.76	M0R380	VSIG10L		0.10953	0.099602	0.11959	0.10953	1	1	1	2	0.052718	92.838	17.918
ALAACNYLPQSR	Unmodified	1362.67	H0Y4W2;F2Z2U4;Q9Y4A5-2;Q9Y4A5	TRRAP	Transformation/transcription domain-associated protein	0.1164	NaN	NaN	0.1164			1	2	0.017983	122.19	39.762
DYDHGTAHKYIIR	Unmodified	1587.78	A8K7I4	CLCA1	Calcium-activated chloride channel regulator 1	0.11652	NaN	NaN	0.11652			1	4	0.19999	78.548	50.003
VEILANDQGNR	Unmodified	1227.62	P17066;P48741	HSPA6;HSPA7	Heat shock 70 kDa protein 6;Putative heat shock 70 kDa protein 7	0.11669	0.11669	NaN	NaN	1			2	0.14531	85.731	0
SQDKAVLKGGPLDGTYR	Unmodified	1803.95	P00918	CA2	Carbonic anhydrase 2	0.12436	NaN	0.12436	NaN		1		4	0.0086211	92.952	67.587
SGAGGAAGAGTGGAGPAGR	Unmodified	1398.66	H0Y494;J3KPC8	SIK3		0.12662	0.12662	NaN	NaN	1			2	0.15183	63.727	17.73
PTGSYHGDSDLQLER	Unmodified	1673.76	Q9BVA1;Q13885	TUBB2B;TUBB2A	Tubulin beta-2B chain;Tubulin beta-2A chain	0.12922	0.092244	0.14396	0.091378	5	7	5	2;3	1.242e-37	176.05	116.85
SDDGFPQIR	Unmodified	1033.48	Q9HAT2-2;Q9HAT2	SIAE	Sialate O-acetylesterase	0.1309	0.12446	0.14023	0.1309	1	1	1	2	0.00092796	162.25	80.469
AFGALSSGNGAVSQR	Unmodified	1420.71	A8K7I4	CLCA1	Calcium-activated chloride channel regulator 1	0.13619	0.085757	0.13619	0.16585	1	1	1	2;3	0.0029786	131.13	72.15
RVLIGGDETPEGQR	Unmodified	1525.78	O60701-3;O60701-2;O60701	UGDH	UDP-glucose 6-dehydrogenase	0.14376	0.087143	0.12455	NaN	3	1		2;3	0.011937	130.15	55.313
ASVDLKNTGR	Unmodified	1059.57	A0A087WXI2;Q9Y6R7	FCGBP	IgGFc-binding protein	0.14391	0.18301	0.14391	0.1339	1	1	1	2	0.027913	94.309	37.763
MEKLAASTEPQGPR	Acetyl (N-term)	1555.77	F5GY07;F5GWK5;F5H5A8;F5H3G8;F5H0V7;F5H8G1;F5GY11;F5H1Z6;F5H8H3;Q9Y365	STARD10	PCTP-like protein	0.14611	0.10772	0.19819	NaN	1	1		2	0.0030664	114.72	35.651
AAAAAQGGGGGEPR	Acetyl (N-term)	1210.57	E9PJF0;E9PQW4;P27361-2;P27361-3;P27361	MAPK3	Mitogen-activated protein kinase;Mitogen-activated protein kinase 3	0.14713	0.21753	0.099513	NaN	1	1	1	2	0.0091268	84.821	44.762
NLQGGDDLDPNYVLSSR	Unmodified	1861.88	P12277;G3V461;G3V4N7	CKB	Creatine kinase B-type	0.14893	0.14893	NaN	NaN	2		1	2	5.0599e-05	108.17	60.882
GEAVALPVAVGR	Unmodified	1137.65	A0A087WXI2;Q9Y6R7	FCGBP	IgGFc-binding protein	0.14922	0.14946	0.14882	0.14587	1	1	1	2	9.2804e-09	173.39	111.28
EYNNDEKFYLSNGR	Unmodified	1747.78	A8K7I4	CLCA1	Calcium-activated chloride channel regulator 1	0.15	0.15	NaN	NaN	1			3	0.049602	93.649	42.514
CGAPSATQPATAETQHIADQVR	Unmodified	2308.09	A0A1W2PS52;P04080	CSTB	Cystatin-B	0.15287	0.15287	NaN	NaN	1			3	0.00065936	98.292	65.311
LGTTPSVYGGAGGR	Unmodified	1291.65	CON__P35900;P35900	KRT20	Keratin, type I cytoskeletal 20	0.15597	0.13008	0.37865	0.16478	2	2	1	2;3	0.00056055	136.96	73.425	+
NAKLAAEDFR	Unmodified	1133.58	CON__P35900;P35900;CON__Q9D312	KRT20	Keratin, type I cytoskeletal 20	0.16538	NaN	NaN	0.16538			1	3	0.039121	90.827	38.878	+
TAELTLLR	Unmodified	915.539	A0A087WXI2;Q9Y6R7	FCGBP	IgGFc-binding protein	0.16542	0.16728	0.1586	0.15259	1	1	1	2	2.9176e-17	163.67	43.048
MLSPKDILR	Acetyl (N-term)	1113.62	D6RD70;O43704	SULT1B1	Sulfotransferase;Sulfotransferase family cytosolic 1B member 1	0.16653	0.16756	0.16394	0.16653	1	1	1	2	9.2667e-06	124.08	45.465
TSKGPEEEHPSVTLFR	Acetyl (N-term)	1854.91	A0A1B0GVZ3;A0A1B0GVG0;A0A1B0GU36;A0A1B0GUT4;A0A1B0GTG3;F8WC59;C9JYZ0;A0A1B0GVA5;A0A1B0GV31;A0A1B0GU86;A0A1B0GW23;Q03154-2;Q03154-3;Q03154-4;Q03154	ACY1	Aminoacylase-1	0.16762	NaN	0.35289	0.079622	1	1	1	3	0.0059415	64.407	11.987
SEGLSQGLVDR	Unmodified	1159.58	P10645	CHGA	Chromogranin-A;Vasostatin-1;Vasostatin-2;EA-92;ES-43;Pancreastatin;SS-18;WA-8;WE-14;LF-19;Catestatin;AL-11;GV-19;GR-44;ER-37;GE-25;Serpinin-RRG;Serpinin;p-Glu serpinin precursor	0.16847	0.19461	0.14584	NaN	1	1		2	0.12499	95.618	41.65
SLSSSLQAPVVSTVGMQR	Unmodified	1845.96	CON__P35900;P35900	KRT20	Keratin, type I cytoskeletal 20	0.16932	0.16582	0.19496	0.15688	4	4	3	2;3	1.2799e-112	214.61	109.67	+
NVESAQASEVKPLR	Unmodified	1526.81	Q12864;E7EN24	CDH17	Cadherin-17	0.1723	NaN	0.14271	0.20803		1	1	3	0.035165	89.46	64.226
LSHPGVSEDDQVSR	Unmodified	1524.72	O60701-3;O60701-2;O60701	UGDH	UDP-glucose 6-dehydrogenase	0.17545	0.16595	0.18129	0.17005	2	3	2	2;3	0.00080157	160.48	107.24
AKINFDDNAEFR	Unmodified	1438.68	E9PDQ8;Q96I99;Q96I99-2	SUCLG2	Succinyl-CoA ligase [GDP-forming] subunit beta, mitochondrial	0.18175	NaN	0.18175	NaN		1		3	0.037764	91.093	47.296
GSWSEWFR	Unmodified	1053.47	Q16762	TST	Thiosulfate sulfurtransferase	0.18722	0.19296	0.18166	0.18012	1	1	1	2	1.3635e-05	147.69	90.516
DAVYLDNEKER	Unmodified	1350.64	P00488	F13A1	Coagulation factor XIII A chain	0.19329	0.19329	NaN	NaN	1			3	0.12106	96.113	45.83
GEHLGSFYAPR	Unmodified	1232.59	Q16762;B1AH48	TST	Thiosulfate sulfurtransferase	0.19406	0.19406	0.18322	0.22595	1	1	1	3	0.033981	92.866	50.676
EKDIQEESTFSSR	Unmodified	1554.72	C9JCA9;B8ZZ38;A0A0C4DG06;P42704	LRPPRC	Leucine-rich PPR motif-containing protein, mitochondrial	0.19652	0.19652	NaN	NaN	1			3	0.17683	80.534	36.543
ISVETPQDVLR	Unmodified	1255.68	Q99795	GPA33	Cell surface A33 antigen	0.19711	0.18409	0.19711	0.19845	1	1	1	2	1.9022e-35	202.44	94.747
SKKISGGSVVEMQGDEMTR	2 Oxidation (M);Acetyl (N-term)	2111.98	O75874;C9JJE5;C9JLU6;C9J4N6	IDH1	Isocitrate dehydrogenase [NADP] cytoplasmic	0.19878	0.19878	0.22414	0.14756	1	1	1	3	0.0014907	92.307	52.444
LNPDNLQGGDDLDPNYVLSSR	Unmodified	2301.09	P12277;G3V461;G3V4N7	CKB	Creatine kinase B-type	0.19889	0.19889	0.17131	0.20436	1	2	1	2;3	3.0329e-06	92.551	35.378
NPPTCPSPVTVFEVQENER	Unmodified	2199.03	Q12864	CDH17	Cadherin-17	0.20152	0.18184	0.15672	0.24552	1	2	2	2;3	1.5994e-06	91.64	50.144
KGKDNVESAQASEVKPLR	Unmodified	1955.04	Q12864;E7EN24	CDH17	Cadherin-17	0.20185	0.20185	NaN	NaN	1			4	0.0087048	88.19	47.588
EGDVLTLLESER	Unmodified	1359.69	P62857	RPS28	40S ribosomal protein S28	0.20378	0.20378	NaN	NaN	1	1		2	0.015431	113.69	113.69
GFEKGPEELR	Unmodified	1160.58	Q16762	TST	Thiosulfate sulfurtransferase	0.2043	0.2043	0.20063	0.23975	1	1	1	3	0.078161	83.397	15.466
TASPYEMMLPSEAGFAEYVGR	Unmodified	2305.04	Q16762;B1AH48	TST	Thiosulfate sulfurtransferase	0.20515	0.20515	NaN	NaN	1			3	0.00071582	81.665	49.79
ADQAPFDTDVNTLTR	Acetyl (N-term)	1704.8	P09467	FBP1	Fructose-1,6-bisphosphatase 1	0.20986	NaN	NaN	0.20986	2	1	1	2;3	0.003801	125.33	98.388
TTPSVYGGAGGR	Unmodified	1121.55	CON__P35900;P35900	KRT20	Keratin, type I cytoskeletal 20	0.21064	0.19241	NaN	0.2306	1		1	2	0.013037	100.25	45.634	+
SKCIGTDLNR	Unmodified	1162.58	P15088	CPA3	Mast cell carboxypeptidase A	0.21434	0.21434	NaN	NaN	1			3	0.0049857	151.79	87.134
EEAENTLQSFR	Unmodified	1322.61	P08670;B0YJC4;B0YJC5	VIM	Vimentin	0.22149	0.20289	0.23218	0.22149	1	1	2	2	2.1675e-07	150.61	112.88
SLEAGLPLQVR	Unmodified	1181.68	P10645;G5E968	CHGA	Chromogranin-A;Vasostatin-1;Vasostatin-2;EA-92;ES-43;Pancreastatin;SS-18;WA-8;WE-14;LF-19;Catestatin;AL-11;GV-19;GR-44;ER-37;GE-25;Serpinin-RRG;Serpinin;p-Glu serpinin precursor	0.22174	0.22174	0.1747	0.19947	1	1	1	2	0.0048561	146.81	50.9
AAPGLNLGVIMNEMR	Unmodified	1584.81	CON__P35900;P35900	KRT20	Keratin, type I cytoskeletal 20	0.22188	0.22188	NaN	NaN	2			2;3	0.0085022	149.41	82.025	+
FGKEPLGPALAHELR	Unmodified	1633.89	Q13228-2;Q13228-3;Q13228;Q13228-4	SELENBP1	Selenium-binding protein 1	0.22523	0.39037	NaN	0.12995	1		1	4	0.1673	75.574	37.893
DNLAEDIMR	Unmodified	1075.5	P08670;B0YJC4	VIM	Vimentin	0.22978	NaN	0.23694	0.22283		1	1	2	0.017745	99.802	70.632
NQPGVLIQVYEGER	Unmodified	1600.82	A0A0G2JIW1;P0DMV8-2;P0DMV9;P0DMV8;V9GZ37;E9PKE3;P11142;P11142-2;E9PNE6;A8K7Q2;Q53FA3;P34931;E9PS65	HSPA1A;HSPA1B;HSPA8;HSPA1L	Heat shock 70 kDa protein 1A;Heat shock 70 kDa protein 1B;Heat shock cognate 71 kDa protein;Heat shock 70 kDa protein 1-like	0.22979	NaN	0.22979	NaN		1		2	0.011365	107.03	29.964
FLTEDGFEKGPEELR	Unmodified	1765.85	Q16762	TST	Thiosulfate sulfurtransferase	0.23341	0.23341	0.18521	0.3317	1	1	1	3	0.0050557	118.51	80.132
DDSTLPLIDR	Unmodified	1143.58	C9JZR2;O60716-24;O60716-23;O60716-21;O60716-19;O60716-22;O60716-20;O60716-16;O60716-18;O60716-15;O60716-17;O60716-13;O60716-11;O60716-14;O60716-12;O60716-10;O60716-8;O60716-9;O60716-7;O60716-5;O60716-3;O60716-6;O60716-4;O60716-2;O60716;O60716-32;O60716-31;O60716-29;O60716-27;O60716-30;O60716-28;O60716-26;O60716-25;H0YC95	CTNND1	Catenin delta-1	0.23815	0.22708	0.24976	NaN	1	1		2	0.0003632	120.31	84.426
VKTTEYQLSTLEER	Unmodified	1695.87	CON__P35900;P35900	KRT20	Keratin, type I cytoskeletal 20	0.24026	0.25532	0.22146	0.24493	3	4	4	2;3	0.0018082	150.46	84.401	+
EDSLEAGLPLQVR	Unmodified	1425.75	P10645;G5E968	CHGA	Chromogranin-A;Vasostatin-1;Vasostatin-2;EA-92;ES-43;Pancreastatin;SS-18;WA-8;WE-14;LF-19;Catestatin;AL-11;GV-19;GR-44;ER-37;GE-25;Serpinin-RRG;Serpinin;p-Glu serpinin precursor	0.24061	0.24061	NaN	NaN	1			2	0.0096655	118.03	50.471
SCNIPVVSGKECEEIIR	Unmodified	1988.97	P02675;D6REL8	FGB	Fibrinogen beta chain;Fibrinopeptide B;Fibrinogen beta chain	0.24191	0.24191	NaN	NaN	1			3	0.16738	69.331	30.82
GLIVPIFQER	Unmodified	1170.68	P04066	FUCA1	Tissue alpha-L-fucosidase	0.24221	0.24221	0.26708	0.23715	1	1	1	2	0.0156	87.308	22.055
TEVQLTELR	Unmodified	1087.59	CON__P35900;P35900	KRT20	Keratin, type I cytoskeletal 20	0.24233	0.21887	0.24233	0.28552	1	1	1	2	0.094817	115.49	30.333	+
EEYVGLSANQCAVPAKDR	Unmodified	2005.95	X6R3S7;A0A0A6YYJ4;Q07654	TFF3	Trefoil factor 3	0.24268	0.21684	0.25801	0.33404	7	2	4	2;3	1.1735e-132	234.82	171.53
TPPVGVFIIER	Unmodified	1226.7	A0A087WX17;A0A087WU43;A0A087WXI5;P12830-2;P12830;H3BNC6;J3QKP1	CDH1	Cadherin-1;E-Cad/CTF1;E-Cad/CTF2;E-Cad/CTF3	0.24352	0.24352	NaN	NaN	1			2	0.040124	90.906	58.065
AQESPKNSAAEIPVTSNGEVDDSR	Acetyl (N-term)	2542.18	P53367-3;P53367-2;P53367	ARFIP1	Arfaptin-1	0.24407	0.71306	0.083541	NaN	1	1	1	3	0.0041041	47.728	22.147
QVQNNGLIDAFGALSSGNGAVSQR	Unmodified	2402.19	A8K7I4	CLCA1	Calcium-activated chloride channel regulator 1	0.24527	0.29893	0.20124	NaN	1	1		3	5.9114e-19	136.62	88.305
PDIDVQDDEVAETVFR	Unmodified	1846.86	Q9P2K2	TXNDC16	Thioredoxin domain-containing protein 16	0.24534	0.26128	0.23036	NaN	1	1		2	0.013907	94.767	37.593
AQLIKELGLR	Unmodified	1139.7	M0QY80;M0QXB5;O95571	ETHE1	Persulfide dioxygenase ETHE1, mitochondrial	0.24681	NaN	0.24015	0.25365		1	1	3	0.021653	96.665	22.289
GQIDADELQR	Unmodified	1143.55	E9PG82;C9J0K6;B4DHQ6;P30626-3;P30626-2;P30626	SRI	Sorcin	0.24887	0.24489	0.26049	0.24887	1	1	1	2	1.0348e-11	163.16	97.087
KSTDHPKYSDMIVAAIQAEKNR	Unmodified	2501.27	P07305-2;P07305	H1F0	Histone H1.0;Histone H1.0, N-terminally processed	0.24942	NaN	0.24942	NaN		1		5	0.15396	58.93	24.782
INDNPPTCPSPVTVFEVQENER	Unmodified	2541.18	Q12864	CDH17	Cadherin-17	0.24984	0.19025	0.24984	0.25466	1	1	1	3	4.7056e-11	125.75	85.129
TANEALEAAKR	Unmodified	1172.61	E9PDQ8;Q96I99;Q96I99-2	SUCLG2	Succinyl-CoA ligase [GDP-forming] subunit beta, mitochondrial	0.25109	0.25109	0.24078	0.26133	1	1	1	3	0.00073723	143.24	74.452
SPLVLEVDPNIQAVR	Unmodified	1648.91	CON__P05787;P05787;P05787-2;F8VUG2;F8W1U3;F8VQY3	KRT8	Keratin, type II cytoskeletal 8	0.25262	0.25262	NaN	0.24059	1		2	2;3	0.024854	78.401	34.505	+
MVDNEAIYDICR	Unmodified	1497.66	Q71U36-2;Q71U36;P68363;F5H5D3;Q9BQE3;F8VVB9;F8VQQ4;Q6PEY2;Q13748;Q13748-2;C9J2C0;Q9NY65-2;Q9NY65;C9JDS9;P68366-2;P68366	TUBA1A;TUBA1B;TUBA1C;TUBA3E;TUBA3C;TUBA8;TUBA4A	Tubulin alpha-1A chain;Tubulin alpha-1B chain;Tubulin alpha-1C chain;Tubulin alpha-3E chain;Tubulin alpha-3C/D chain;Tubulin alpha-8 chain;Tubulin alpha-4A chain	0.25416	NaN	0.25416	NaN		1		2	0.092244	94.297	41.807
SPVKDEVVVNDR	Unmodified	1355.7	P04066	FUCA1	Tissue alpha-L-fucosidase	0.25731	0.25054	0.31452	0.23813	2	2	2	2;3	0.010785	103.11	72.285
MDNSGKEAEAMALLAEAER	Oxidation (M);Acetyl (N-term)	2092.94	M0QZM9;M0QZN5;M0R031;M0R0Y2;M0R2M1;P54920	NAPA	Alpha-soluble NSF attachment protein	0.25924	NaN	0.25924	NaN		1		3	0.01147	84.493	53.957
TALPAQSAATLPAR	Unmodified	1366.76	Q01082;A0A087WUZ3	SPTBN1	Spectrin beta chain, non-erythrocytic 1	0.25933	0.25933	NaN	NaN	1			2	0.119	71.085	20.28
AVVVKKIETR	Unmodified	1141.72	CON__P05787;P05787;P05787-2	KRT8	Keratin, type II cytoskeletal 8	0.25935	0.23731	NaN	0.28345	1		1	3	0.055989	112.3	63.855	+
MLSPKDILR	Oxidation (M);Acetyl (N-term)	1129.62	D6RD70;O43704	SULT1B1	Sulfotransferase;Sulfotransferase family cytosolic 1B member 1	0.26165	0.1784	NaN	0.38376	1		1	2	0.16114	71.692	32.874
LSAGSGPGQYLQR	Unmodified	1332.68	A0A1B0GTL9;A0A1B0GUB8;A0A1B0GUD9;A0A1B0GTM0;A0A1B0GV75;A0A1B0GTB8;A0A1B0GWC0;A0A1B0GVF3;P23786	CPT2	Carnitine O-palmitoyltransferase 2, mitochondrial	0.26178	0.23678	0.28251	0.24257	2	1	1	2	0.0011894	155.26	116.24
EENTANSFLNYR	Unmodified	1456.66	Q12864;E7EN24	CDH17	Cadherin-17	0.26736	0.21496	0.26736	0.28148	1	1	1	2	0.010104	126.71	71.644
DDNFASIVTGVEEGR	Unmodified	1607.74	P05023-3;P05023-4;P05023;M0R116;A0A0A0MT26;P13637;P13637-2;P13637-3;B1AKY9;P50993;Q13733;H0Y7C1;P54707;P54707-2	ATP1A1;ATP1A3;ATP1A2;ATP1A4;ATP12A	Sodium/potassium-transporting ATPase subunit alpha-1;Sodium/potassium-transporting ATPase subunit alpha-3;Sodium/potassium-transporting ATPase subunit alpha-2;Sodium/potassium-transporting ATPase subunit alpha-4;Potassium-transporting ATPase alpha chain 2	0.26769	NaN	NaN	0.26769	1		1	2	0.074039	92.039	45.687
LGDLYEEEMR	Unmodified	1253.56	P08670;B0YJC4	VIM	Vimentin	0.26961	0.26961	NaN	NaN	1			2	0.1884	86.624	27.948
GPGAEPEDWGILGR	Unmodified	1452.7	Q0VD83-3;Q0VD83;Q0VD83-4	APOBR	Apolipoprotein B receptor	0.27003	NaN	0.27003	NaN		1		2	0.10807	82.494	32.141
PLAAAVEAANGAEQTR	Unmodified	1567.8	A0A087X1R1;P53814-5;P53814;P53814-6;H7BZZ8;B5MCI0;A0A087WVP4;P53814-2	SMTN	Smoothelin	0.27052	NaN	0.27052	NaN		1		2	0.1431	74.841	23.313
PPTDSPSKAGPR	Unmodified	1208.61	E9PG08;Q9UGM5-2;Q9UGM5	FETUB	Fetuin-B	0.27121	NaN	0.23237	0.31653		1	1	2	0.046161	104.2	32.821
KTGTAEMSSILEER	Unmodified	1550.76	P25705;P25705-3;K7ERX7;K7ESA0	ATP5A1	ATP synthase subunit alpha, mitochondrial	0.27254	0.3825	0.19419	NaN	1	1		3	0.015104	121.42	70.521
AFDSTWKVDR	Acetyl (N-term)	1265.6	P12104	FABP2	Fatty acid-binding protein, intestinal	0.27303	0.28655	0.27303	0.24245	1	1	1	2	1.516e-20	141.52	81.043
EGPSKAFVNCDENSR	Unmodified	1708.75	P01833	PIGR	Polymeric immunoglobulin receptor;Secretory component	0.27523	0.27523	NaN	NaN	1			3	0.054011	87.083	34.049
TTSGALFPSLVPGSR	Acetyl (N-term)	1530.8	Q16186;A0A087WX59;A0A087WUX6	ADRM1	Proteasomal ubiquitin receptor ADRM1	0.27524	0.25666	0.29517	NaN	1	2	2	2	0.0059063	106.26	54.331
SGEIAMCEPEFGNDKAR	Acetyl (N-term)	1951.84	O94778	AQP8	Aquaporin-8	0.27608	NaN	NaN	0.27608		1	1	2;3	0.0033286	131.06	97.787
SMQTIQKTTTR	Unmodified	1293.67	P05783	KRT18	Keratin, type I cytoskeletal 18	0.27613	0.27613	0.23678	0.3378	1	1	1	3	0.0028008	112.13	53.993
MNKIMSYSSDFR	Acetyl (N-term)	1519.68	H3BQF8;A0A087WTJ9;Q8IWV7-2;Q8IWV7	UBR1	E3 ubiquitin-protein ligase UBR1	0.27682	NaN	NaN	0.27682			1	2	0.032659	67.704	14.377
AGGADAVQTVTGGLR	Unmodified	1371.71	Q9H223	EHD4	EH domain-containing protein 4	0.27696	NaN	NaN	0.27696			1	2	0.072274	84.289	27.726
IVDAALSALR	Unmodified	1027.6	Q15084-3;Q15084;Q15084-4;Q15084-5;Q15084-2	PDIA6	Protein disulfide-isomerase A6	0.27699	NaN	0.27699	NaN		1		2	0.20244	70.525	15.748
RLASYLEKVR	Unmodified	1233.72	CON__P35900;P35900;J3QR55;K7EQH6;K7EMD9;G3V1C2;CON__O76011;CON__Q6NTB9;CON__Q14525;CON__O76009;K7ERE3;CON__Q9UE12;CON__Q15323;CON__ENSEMBL:ENSP00000377550;CON__Q9C075;CON__Q6IFU5;CON__Q8IUT8;A0A140TA69;A0A140TA62;CON__Q497I4;CON__P13646-1;P13646-2;Q14525;O76009;Q15323;P13646-3;Q9C075;Q6A162;O76011;P13646	KRT20;KRT23;KRT13;KRT40;KRT33B;KRT33A;KRT31;KRT34	Keratin, type I cytoskeletal 20;Keratin, type I cytoskeletal 13;Keratin, type I cuticular Ha3-II;Keratin, type I cuticular Ha3-I;Keratin, type I cuticular Ha1;Keratin, type I cytoskeletal 23;Keratin, type I cytoskeletal 40;Keratin, type I cuticular Ha4	0.27871	0.29297	0.25243	0.13791	1	1	2	3	0.0055325	111.5	19.913	+
GVVDSEDLPLNISR	Unmodified	1512.78	P08238;Q58FF7;P07900;P07900-2	HSP90AB1;HSP90AB3P;HSP90AA1	Heat shock protein HSP 90-beta;Putative heat shock protein HSP 90-beta-3;Heat shock protein HSP 90-alpha	0.28213	0.26934	0.57856	0.28213	1	1	1	2	0.0044405	112.94	0
HLIEAQVGGEKDLR	Unmodified	1563.84	A2A274;Q99798	ACO2	Aconitate hydratase, mitochondrial	0.28451	0.22267	0.36352	NaN	1	1		3	0.0025876	115.34	67.298
CSPADKPYIDEAR	Unmodified	1520.69	Q96DG6	CMBL	Carboxymethylenebutenolidase homolog	0.28615	0.28615	NaN	NaN	1			3	0.16564	81.494	45.201
DEEASGFIHEDHLR	Unmodified	1653.74	P24844	MYL9	Myosin regulatory light polypeptide 9	0.28823	0.28823	NaN	NaN	1			3	0.12018	107.93	47.438
SHKDEVVKIQSLAR	Unmodified	1608.89	A0A0J9YXZ5;P46940;H0YLE8	IQGAP1	Ras GTPase-activating-like protein IQGAP1	0.29066	NaN	0.29066	NaN		1		4	0.10261	83.243	33.036
GVKELDSLNSDR	Unmodified	1331.67	C9K0G7;C9JM78;C9JQ90;A0A0G2JRX6;E9PCG9;Q02338	BDH1	D-beta-hydroxybutyrate dehydrogenase, mitochondrial	0.29185	0.27175	0.30023	0.29185	1	1	1	3	0.011713	131.13	67.091
TCSHLEVSSLCEEHR	Unmodified	1842.8	A0A0G2JM87;A0A0G2JR65;Q02817	MUC2	Mucin-2	0.29353	NaN	0.29353	NaN		1		4	0.016206	91.307	73.44
AAPGLNLGVIMNEMR	Oxidation (M)	1600.81	CON__P35900;P35900	KRT20	Keratin, type I cytoskeletal 20	0.29608	0.28541	0.47019	0.23723	1	1	2	2;3	0.027595	95.094	50.482	+
TLPAFSVEAKNEHR	Unmodified	1597.82	A0A087WXI2;Q9Y6R7	FCGBP	IgGFc-binding protein	0.298	NaN	0.298	NaN		1		4	0.1029	83.204	32.641
ISGLIYEETR	Unmodified	1179.61	P62805	HIST1H4A	Histone H4	0.30312	0.30312	0.3633	0.29455	1	1	1	2	0.07611	83.647	30.154
LQVLKPEPELVYEDLR	Unmodified	1940.06	P01833	PIGR	Polymeric immunoglobulin receptor;Secretory component	0.30463	0.31351	NaN	0.296	1		1	3	0.0066507	121.32	59.912
STAASRPPVTLR	Unmodified	1254.7	H3BND9;F8W0G4;F8VXH9;F8W1G6;H3BRU6;F8VZX2;Q15366-7;Q15366-8;Q15366-4;Q15366-5;Q15365;Q15366-6;Q15366-3;Q15366;Q15366-2	PCBP2;PCBP1	Poly(rC)-binding protein 2;Poly(rC)-binding protein 1	0.30641	NaN	0.29785	0.31522		1	1	3	0.052821	87.713	9.4496
ISCPEGTNAYR	Unmodified	1266.57	P48304;P05451	REG1B;REG1A	Lithostathine-1-beta;Lithostathine-1-alpha	0.30749	0.32795	0.2903	0.30749	1	1	1	2	0.051532	88.177	59.007
TANWLEINPDTGAISTR	Unmodified	1857.92	A0A087WX17;A0A087WU43;A0A087WXI5;P12830-2;P12830	CDH1	Cadherin-1;E-Cad/CTF1;E-Cad/CTF2;E-Cad/CTF3	0.30805	0.37496	0.31056	0.19999	2	2	1	2;3	0.0048377	96.464	31.285
STDHPKYSDMIVAAIQAEKNR	Unmodified	2373.17	P07305-2;P07305	H1F0	Histone H1.0;Histone H1.0, N-terminally processed	0.31334	0.2513	NaN	0.39884	1		2	4;5	0.00036254	90.442	38.917
DTLPAFSVEAKNEHR	Unmodified	1712.85	A0A087WXI2;Q9Y6R7	FCGBP	IgGFc-binding protein	0.31654	0.31654	NaN	NaN	1			3	0.013736	100.54	59.817
LSPLVLEVDPNIQAVR	Unmodified	1762	CON__P05787;P05787;P05787-2;F8VUG2;F8W1U3;F8VQY3	KRT8	Keratin, type II cytoskeletal 8	0.31865	0.29629	NaN	0.34269	1		1	3	0.022306	91.307	35.22	+
VSTSSMGTLPKR	Unmodified	1262.67	H0Y2L7;P35914-3;P35914-2;P35914	HMGCL	Hydroxymethylglutaryl-CoA lyase, mitochondrial	0.3234	0.3234	0.31683	0.33404	1	1	1	3	0.010703	103.21	71.453
GTEAENTATLTLLEQQGLIR	Unmodified	2157.13	A0A0A0MS74;H0YM31;Q16822-2;Q16822	PCK2	Phosphoenolpyruvate carboxykinase [GTP], mitochondrial	0.32492	0.35555	0.29692	NaN	1	1		3	9.1992e-06	101.61	64.137
SSNSMQTIQKTTTR	Unmodified	1581.78	P05783	KRT18	Keratin, type I cytoskeletal 18	0.32641	0.33348	0.31576	0.32641	2	1	1	2;3	0.0075643	101.2	71.064
VVCEDPEEEVAPASCSEHR	Unmodified	2198.92	A0A0G2JM87;A0A0G2JR65;Q02817	MUC2	Mucin-2	0.33156	0.34785	0.31603	NaN	1	1		3	1.1753e-05	134.08	129.21
GLPAEQGSPR	Unmodified	1010.51	Q01082;A0A087WUZ3;Q01082-2;Q01082-3	SPTBN1	Spectrin beta chain, non-erythrocytic 1	0.33327	NaN	0.33327	NaN		1		2	0.026477	94.85	34.09
EAYMNKVELESR	Unmodified	1467.7	CON__P05787;P05787;P05787-2;F8VUG2;F8W1U3;CON__H-INV:HIT000292931;F8VP67	KRT8	Keratin, type II cytoskeletal 8	0.33329	0.47575	0.3242	0.39857	3	3	3	2;3	9.3765e-05	150.51	98.121	+
GGVDVTLPR	Unmodified	912.503	Q09666	AHNAK	Neuroblast differentiation-associated protein AHNAK	0.33466	NaN	NaN	0.33466			1	2	0.097626	116.25	29.069
APDQDEIQR	Unmodified	1070.5	U3KQU6;X6R5C5;X6R8A1;P10619-2;P10619;U3KQF1;U3KQ41	CTSA	Carboxypeptidase;Lysosomal protective protein;Lysosomal protective protein 32 kDa chain;Lysosomal protective protein 20 kDa chain	0.335	NaN	NaN	0.335			1	2	0.1766	76.478	39.717
MIFEDCGDVPSEPKER	Unmodified	1907.84	V9GYR2;P05026-2;P05026	ATP1B1	Sodium/potassium-transporting ATPase subunit beta-1	0.33535	0.33978	0.38275	0.28324	2	1	2	3	0.00026083	107.61	64.425
DAINGLSEEQR	Unmodified	1230.58	A0A0A0MT83;P26440-2;P26440;A0A087WVD3	IVD	Isovaleryl-CoA dehydrogenase, mitochondrial	0.33553	0.31231	0.36048	NaN	1	1		2	0.0040422	147.95	94.62
LAAAGYDVEKNNSR	Unmodified	1506.74	P16403;P10412;P16402;P22492;Q02539	HIST1H1C;HIST1H1E;HIST1H1D;HIST1H1T;HIST1H1A	Histone H1.2;Histone H1.4;Histone H1.3;Histone H1t;Histone H1.1	0.3367	0.3367	NaN	NaN	1			3	0.11401	74.475	23.578
GGAAQLALDKSDSHPSDALTR	Unmodified	2109.05	J3QKU9;K7EJW8;K7EQP4;P49748;P49748-3	ACADVL	Very long-chain specific acyl-CoA dehydrogenase, mitochondrial	0.33917	0.45858	0.37556	0.28191	1	2	2	3;4	1.2717e-27	164.53	117.33
GVNYLIDCER	Unmodified	1237.58	P12532;P12532-2	CKMT1A	Creatine kinase U-type, mitochondrial	0.33929	0.32409	0.35519	NaN	4	1		2	0.014853	99.815	64.37
VLEVDPNIQAVR	Unmodified	1351.75	CON__P05787;P05787;P05787-2;F8VUG2;F8W1U3;F8VQY3	KRT8	Keratin, type II cytoskeletal 8	0.33981	0.33195	0.33981	0.37648	1	1	2	2	5.2563e-05	160.59	100.15	+
GEMADCCAKQEPER	Unmodified	1679.67	A0A0C4DGB6;CON__P02768-1;P02768;A0A087WWT3;P02768-3;H7C013	ALB	Serum albumin	0.34023	0.43382	0.35934	0.21138	2	1	1	2;3	0.006412	110.38	71.232	+
FMDQSDIETMR	Unmodified	1371.58	Q9P212-2;Q9P212	PLCE1	1-phosphatidylinositol 4,5-bisphosphate phosphodiesterase epsilon-1	0.34332	0.34332	NaN	NaN	1			2	0.021562	98.044	59.268
GKVVSSEVKEVEENI	Unmodified	1644.86	CON__P35900;P35900	KRT20	Keratin, type I cytoskeletal 20	0.3441	0.31762	0.32086	0.3931	1	2	1	2;3	0.023088	96.866	43.298	+
TLQGGKWGSEER	Unmodified	1346.66	P56470	LGALS4	Galectin-4	0.34559	NaN	0.292	0.40902		1	1	3	0.0070362	109	47.404
GLLAGNEKLTMQNLNDR	Oxidation (M)	1901.96	CON__P08727;P08727;C9JM50	KRT19	Keratin, type I cytoskeletal 19	0.34651	NaN	0.34938	0.34367		1	1	3	0.032918	79.652	40.508	+
EGLPPILNALEVQGR	Unmodified	1604.89	P06576;F8W0P7	ATP5B	ATP synthase subunit beta, mitochondrial	0.34833	0.25732	0.47153	NaN	1	1		3	0.0071523	122.63	79.947
DEEATGTIQEDYLR	Unmodified	1638.74	J3QRS3;P19105;O14950	MYL12A;MYL12B	Myosin regulatory light chain 12A;Myosin regulatory light chain 12B	0.34858	0.34634	0.34858	0.42758	1	1	1	2	0.0072338	122.42	43.766
DSLVSIFGNR	Unmodified	1106.57	P30044-2;P30044;P30044-4;P30044-3	PRDX5	Peroxiredoxin-5, mitochondrial	0.35298	0.35298	0.33609	0.38897	1	1	1	2	5.7153e-123	244.76	140.93
EAGAGSATEFQFR	Unmodified	1369.63	P46783;Q9NQ39	RPS10;RPS10P5	40S ribosomal protein S10;Putative 40S ribosomal protein S10-like	0.35422	0.35422	NaN	NaN	1			2	0.19238	79.201	33.603
KAQIHDLVLVGGSTR	Unmodified	1592.9	A0A0G2JIW1;P0DMV8-2;P0DMV9;P0DMV8;V9GZ37	HSPA1A;HSPA1B	Heat shock 70 kDa protein 1A;Heat shock 70 kDa protein 1B	0.35875	NaN	0.44723	0.28778		1	1	3	0.11527	71.08	59.289
LEGLTDEINFLR	Unmodified	1418.74	CON__P05787;P05787;P05787-2;F8VUG2;F8W1U3;CON__H-INV:HIT000292931;F8VP67;CON__Q9H552	KRT8	Keratin, type II cytoskeletal 8	0.35926	0.29677	0.43001	0.35926	1	1	1	2	0.00026427	155	80.626	+
DSIPANPALLTYPR	Unmodified	1526.81	Q99959-2;Q99959	PKP2	Plakophilin-2	0.35933	0.35933	0.3233	0.43252	1	1	1	2	0.0029904	114.82	54.256
GTEYWIVR	Unmodified	1022.52	Q9UBR2	CTSZ	Cathepsin Z	0.36187	0.45466	0.35463	0.36187	1	1	1	2	0.00077443	143.11	74.685
DLPKSWDWR	Unmodified	1201.59	Q9UBR2	CTSZ	Cathepsin Z	0.36243	0.34341	0.3825	0.35813	3	1	1	3	0.0089716	112.11	60.579
ASSSSPEAGEGQIR	Unmodified	1374.64	J3QSS7;Q86U28-2;Q86U28	ISCA2	Iron-sulfur cluster assembly 2 homolog, mitochondrial	0.36249	0.36249	0.393	0.32717	1	1	1	2	0.0042196	113.22	50.008
AIMTTETTKTAR	Unmodified	1322.69	Q14126	DSG2	Desmoglein-2	0.36378	NaN	0.36378	NaN		1		3	0.032454	92.611	55.103
TKVYTVDLGR	Unmodified	1150.63	P01833	PIGR	Polymeric immunoglobulin receptor;Secretory component	0.36463	0.39966	NaN	0.33267	1		1	3	0.030219	93.442	42.006
ELASDVAGAEALLDR	Unmodified	1528.77	A0A0D9SF54;Q13813-3;Q13813;Q13813-2;A0A0D9SGF6	SPTAN1	Spectrin alpha chain, non-erythrocytic 1	0.36586	NaN	0.36586	NaN		1		2	0.044462	89.805	28.113
FTNENPLETR	Unmodified	1219.58	P05023-3;P05023-4;P05023;P05023-2	ATP1A1	Sodium/potassium-transporting ATPase subunit alpha-1	0.36935	NaN	0.45915	0.29711		1	1	2	0.16488	73.887	73.887
SPFVVPVASLSDDAR	Unmodified	1558.8	Q14315-2;Q14315	FLNC	Filamin-C	0.37091	0.37091	0.38356	0.32982	1	1	1	2	0.015746	99.752	42.185
QDVDNASLAR	Unmodified	1087.53	P08670;B0YJC4;B0YJC5	VIM	Vimentin	0.37093	0.37093	NaN	NaN	1			2	0.072055	111.06	29.87
TGVSLPSYEEDQGSKLIR	Unmodified	1978	C9JAW5;C9JNU6;Q9Y241;Q9Y241-2	HIGD1A	HIG1 domain family member 1A, mitochondrial	0.37189	0.45711	0.30255	NaN	1	1		3	0.00098332	103.01	86.022
VLDVNEAPIFVPPEKR	Unmodified	1822	A0A087WX17;A0A087WU43;A0A087WXI5;P12830-2;P12830;H3BNC6	CDH1	Cadherin-1;E-Cad/CTF1;E-Cad/CTF2;E-Cad/CTF3	0.37229	0.37229	0.36435	4.1799	1	1	1	3	0.00040846	132.15	76.978
GGYKEPAAPVSIQR	Unmodified	1471.78	Q14847;Q14847-3;C9J9W2;Q14847-2;J3KSN1	LASP1	LIM and SH3 domain protein 1	0.37488	0.35977	0.37802	0.39063	1	2	1	2;3	0.010041	113.37	92.361
GVCGAPEDIECR	Unmodified	1361.57	A0A0G2JM87;A0A0G2JR65;Q02817	MUC2	Mucin-2	0.37494	0.39245	0.36583	0.37494	1	1	1	2	0.010441	103.55	72.749
YVDVGGAYVGPTQNR	Unmodified	1594.77	P21397	MAOA	Amine oxidase [flavin-containing] A	0.37917	0.41374	0.34748	NaN	1	1		2	0.0072973	105.2	59.202
FGIVTSSAGTGTTEDTEAKKR	Unmodified	2155.08	H0YHG0;P82979	SARNP	SAP domain-containing ribonucleoprotein	0.38066	NaN	0.3767	0.38468		1	1	4	0.0061804	74.993	69.038
SGANFEYIIAEKR	Unmodified	1496.76	P30084	ECHS1	Enoyl-CoA hydratase, mitochondrial	0.3818	0.39795	0.3663	NaN	1	1		3	0.015913	96.707	48.592
AQELLQEETR	Unmodified	1215.61	Q7Z406;Q7Z406-6;Q7Z406-2;A0A0C4DFM8;Q7Z406-5	MYH14	Myosin-14	0.38246	0.38246	NaN	NaN	1			2	0.068313	84.817	26.141
GASQFQEVIR	Unmodified	1133.58	C9J3M0;F2Z3P4;C9J6Q0;F8WC70;F2Z3H1;C9JTZ5;C9JUW1;C9JWG0;C9JVG3;C9JNZ1;A0A087WYS1;E7EUC7;Q16851-2;Q16851;C9JQU9	UGP2	UTP--glucose-1-phosphate uridylyltransferase	0.38379	0.40841	0.38379	0.37997	1	1	1	2	8.1328e-27	209.73	153.29
AQLPSLEGDLR	Unmodified	1197.64	Q09666	AHNAK	Neuroblast differentiation-associated protein AHNAK	0.38469	NaN	0.38469	NaN		1		2	0.14531	85.731	16.884
QILGETPQNLSRDMKSFPR	Unmodified	2216.14	A0A0R4J2F1;Q5VVP1;Q8IWB4;Q5VYP0;Q5VU36;Q5TZJ5	SPATA31A6;SPATA31A7;SPATA31A3;SPATA31A5;SPATA31A1	Spermatogenesis-associated protein 31A6;Spermatogenesis-associated protein 31A7;Spermatogenesis-associated protein 31A3;Spermatogenesis-associated protein 31A5;Spermatogenesis-associated protein 31A1	0.38601	0.45183	NaN	0.32978	1		1	3	0.040106	67.646	50.615
ALSGLKGDLAGR	Unmodified	1156.66	P12532;P12532-2;C9JSQ1;F8WCN3	CKMT1A;CKMT1B	Creatine kinase U-type, mitochondrial	0.38648	0.38648	0.33888	0.5257	1	1	1	3	0.0091378	105.2	59.606
AGGPTTPLSPTR	Unmodified	1153.61	A0A0D9SFY5;A0A0D9SFE5;E9PBF6;P20700	LMNB1	Lamin-B1	0.38651	0.39054	0.38651	0.36871	1	1	1	2	0.012007	113.93	89.896
DLPTVELQGVVPR	Unmodified	1421.79	P00488;Q9NQP5;H0Y796;A6PVK5	F13A1	Coagulation factor XIII A chain	0.38745	0.38745	0.39927	0.37212	1	3	1	2;3	0.00075381	145.99	97.386
IEENDEVLVAGFGR	Unmodified	1546.76	D6RD47;P62266	RPS23	40S ribosomal protein S23	0.38877	0.3638	0.40144	NaN	1	2		2	0.0079131	108.43	49.451
TQVEGDDEAAFLER	Unmodified	1578.72	Q05682;C9J813;E9PGZ1;E7EX44;Q05682-5;Q05682-4;Q05682-3;Q05682-6;Q05682-2;C9JEK3	CALD1	Caldesmon	0.39235	0.39235	NaN	NaN	1			2	0.049678	93.623	42.531
STDTGVSLPSYEEDQGSKLIR	Acetyl (N-term)	2323.12	C9JAW5;C9JNU6;Q9Y241;Q9Y241-2	HIGD1A	HIG1 domain family member 1A, mitochondrial	0.39327	0.40132	0.3766	0.42924	3	3	3	2;3	3.4602e-70	115.09	51.331
SADLVAQLR	Unmodified	971.54	F5GWF6;P78371;P78371-2	CCT2	T-complex protein 1 subunit beta	0.39439	NaN	0.39439	NaN		1		2	0.1547	98.523	28.525
DSTLPLIDR	Unmodified	1028.55	C9JZR2;O60716-24;O60716-23;O60716-21;O60716-19;O60716-22;O60716-20;O60716-16;O60716-18;O60716-15;O60716-17;O60716-13;O60716-11;O60716-14;O60716-12;O60716-10;O60716-8;O60716-9;O60716-7;O60716-5;O60716-3;O60716-6;O60716-4;O60716-2;O60716;O60716-32;O60716-31;O60716-29;O60716-27;O60716-30;O60716-28;O60716-26;O60716-25;H0YC95	CTNND1	Catenin delta-1	0.39713	0.37566	0.41983	NaN	1	1		2	0.001798	133.58	77.035
AFVTGEWGR	Unmodified	1021.5	P30044-2;P30044	PRDX5	Peroxiredoxin-5, mitochondrial	0.39832	0.38767	0.41204	0.39832	1	1	1	2	4.6465e-13	163.9	117.53
ANAKLSELEAALQR	Unmodified	1512.83	CON__P05787;P05787;P05787-2;CON__H-INV:HIT000292931;CON__Q9H552;CON__REFSEQ:XP_092267	KRT8	Keratin, type II cytoskeletal 8	0.40002	0.46472	0.39975	0.40002	4	7	8	2;3	4.601e-33	171.26	48.556	+
SLVSIFGNR	Unmodified	991.545	P30044-2;P30044;P30044-4;P30044-3	PRDX5	Peroxiredoxin-5, mitochondrial	0.40191	0.40191	NaN	NaN	1			2	0.019332	157.34	62.935
RETFDGVCGAPEDIECR	Unmodified	2009.86	A0A0G2JM87;A0A0G2JR65			0.40202	0.43892	0.38258	0.41079	1	2	1	3	0.0044162	97.352	61.642
FTPVCTTELGR	Unmodified	1279.62	P30041	PRDX6	Peroxiredoxin-6	0.40385	0.40385	0.39089	0.35701	1	1	1	2	0.053081	87.806	51.113
TDEANTYFKEWTCSSSPSLPR	Unmodified	2475.1	Q8WWA0	ITLN1	Intelectin-1	0.40594	0.40613	0.40285	0.39715	1	1	1	3	4.3495e-103	223.18	185.8
SIIAEVKAQYEDIANR	Unmodified	1818.95	CON__P05787;P05787;P05787-2;F8VUG2;CON__Q5XQN5;CON__Q8BGZ7;CON__O95678;CON__Q922U2;O95678	KRT8;KRT75	Keratin, type II cytoskeletal 8;Keratin, type II cytoskeletal 75	0.40723	0.40723	NaN	NaN	1			3	0.010393	110.22	65.248	+
SKKISGGSVVEMQGDEMTR	Oxidation (M);Acetyl (N-term)	2095.99	O75874;C9JJE5;C9JLU6;C9J4N6	IDH1	Isocitrate dehydrogenase [NADP] cytoplasmic	0.40772	0.40772	0.50633	0.39826	1	1	1	3	0.0015764	51.535	20.96
KKWENPGLGAESHTDSLR	Unmodified	2024.01	F8VRN8;Q9UHB6;Q9UHB6-4;F8VVQ7;F8VTU2	LIMA1	LIM domain and actin-binding protein 1	0.40973	0.40973	NaN	NaN	1			4	0.023844	76.051	32.754
TYAQGGQQTWAPER	Unmodified	1591.74	P21333-2;P21333;Q60FE5;A0A087WWY3;H0Y5F3	FLNA	Filamin-A	0.40985	0.45257	0.3761	NaN	3	1		2	0.0031999	116.03	60.962
CEPEFGNDKAR	Acetyl (N-term)	1363.58	O94778;A0A0C4DGL6	AQP8	Aquaporin-8	0.41025	NaN	0.41025	NaN		1		2	0.14531	85.731	36.936
DMIFEDCGDVPSEPKER	Unmodified	2022.87	V9GYR2;P05026-2;P05026	ATP1B1	Sodium/potassium-transporting ATPase subunit beta-1	0.41056	0.41056	0.35806	NaN	1	2		3	0.00016447	115.8	71.549
GVNYASITR	Unmodified	979.509	Q9UBR2	CTSZ	Cathepsin Z	0.41057	NaN	0.39765	0.42391		1	1	2	0.016567	101.25	48.086
DDEPPPLPR	Unmodified	1034.5	O00264-2;O00264	PGRMC1	Membrane-associated progesterone receptor component 1	0.41066	NaN	0.41066	NaN		1		2	0.13281	101.33	32.54
GLTQPPSVSKGLR	Unmodified	1338.76	A0A075B6I4	IGLV10-54		0.4109	0.40808	NaN	0.41375	1		1	3	0.026567	92.781	48.217
TGAIVDVPVGEELLGR	Unmodified	1623.88	P25705;P25705-2;K7ERX7;K7EQH4;K7EJP1;K7EK77	ATP5A1	ATP synthase subunit alpha, mitochondrial	0.41691	NaN	0.43672	0.39801		1	1	2	0.0011215	103.75	43.318
CAVNYAENR	Unmodified	1095.48	E9PE82;P16219	ACADS	Short-chain specific acyl-CoA dehydrogenase, mitochondrial	0.41765	0.17553	NaN	0.99374	1		1	2	0.036432	95.815	48.241
NSSLTGESEPQTR	Unmodified	1404.65	P05023-3;P05023-4;P05023;M0R116;A0A0A0MT26;P13637;P13637-2;P13637-3;B1AKY9;P05023-2;P50993;M0QXF2;P20648	ATP1A1;ATP1A3;ATP1A2;ATP4A	Sodium/potassium-transporting ATPase subunit alpha-1;Sodium/potassium-transporting ATPase subunit alpha-3;Sodium/potassium-transporting ATPase subunit alpha-2;Potassium-transporting ATPase alpha chain 1	0.41794	0.44437	0.38709	0.41794	1	1	1	2	6.612e-26	193.22	167.59
NMFESYINNLR	Unmodified	1399.66	CON__P05787;P05787;P05787-2;F8VUG2;F8W1U3;CON__H-INV:HIT000292931;F8VP67	KRT8	Keratin, type II cytoskeletal 8	0.41905	0.42809	0.40818	0.41905	1	1	1	2	8.8054e-73	222.42	163.07	+
AQTLPTSVVTITSESSPGKR	Unmodified	2058.1	Q01082;A0A087WUZ3	SPTBN1	Spectrin beta chain, non-erythrocytic 1	0.41935	NaN	0.41935	NaN	1	1		3	0.036127	72.21	28.755
ALDSSNSMQTIQKTTTR	Unmodified	1880.93	P05783	KRT18	Keratin, type I cytoskeletal 18	0.4205	0.40335	0.42453	0.45172	3	2	1	2;3	3.1717e-05	164.15	119.71
SPYLAGGDAR	Acetyl (N-term)	1047.5	H0YDM2;O94964-3;O94964;O94964-2;X6R3R3;O94964-4	SOGA1	Protein SOGA1;N-terminal form;C-terminal 80 kDa form	0.42088	NaN	NaN	0.42088			1	2	1	NaN	NaN
GEDFNLGDALDSSNSMQTIQKTTTR	Unmodified	2728.26	P05783	KRT18	Keratin, type I cytoskeletal 18	0.42089	0.4218	0.40604	0.40334	1	2	1	3	1.1223e-125	224.8	202.23
CGDVPSEPKER	Unmodified	1272.58	V9GYR2;P05026-2;P05026	ATP1B1	Sodium/potassium-transporting ATPase subunit beta-1	0.42098	0.39047	0.45387	NaN	1	1		3	0.078052	102.4	49.163
GALVQHQEWDGKESTITR	Unmodified	2054.02	Q01469;I6L8B7;A8MUU1	FABP5;FABP5P3	Fatty acid-binding protein, epidermal;Putative fatty acid-binding protein 5-like protein 3	0.42114	0.39705	0.42426	0.41283	5	4	4	3;4	4.2152e-10	148.03	89.142
GKLVSESSDVLPK	Unmodified	1357.75	CON__P05787;P05787;P05787-2	KRT8	Keratin, type II cytoskeletal 8	0.42121	0.39451	0.40844	0.44045	5	2	7	2;3	5.5554e-11	155.66	155.66	+
ILADLIPKEQAR	Unmodified	1365.8	F8W031			0.42155	0.42155	1.042	0.40268	1	1	1	3	0.023222	110.84	46.399
ALQEIIQER	Unmodified	1098.6	Q9Y6N5;H3BNX3	SQRDL	Sulfide:quinone oxidoreductase, mitochondrial	0.42192	0.42192	0.41792	0.4298	1	1	1	2	5.051e-21	182.98	89.556
GKVVSETNDTKVLR	Unmodified	1544.85	P05783	KRT18	Keratin, type I cytoskeletal 18	0.42476	0.3582	0.40037	0.45736	4	2	4	2;3;4	1.3227e-72	198.52	117.6
SVSDSGSDALR	Unmodified	1092.5	Q5VZS7;Q53EL6-2;Q53EL6	PDCD4	Programmed cell death protein 4	0.42565	NaN	NaN	0.42565			1	2	0.14209	87.258	28.341
GILGMAYPR	Unmodified	976.516	C9JH19;H7C469;A0A1B0GW44;A0A1B0GVP3;A0A1B0GV23;A0A1B0GVD5;A0A1B0GWE8;A0A1B0GU92;A0A1B0GU03;P07339;F8W787;F8WD96	CTSD	Cathepsin D;Cathepsin D light chain;Cathepsin D heavy chain	0.42678	NaN	0.42678	NaN		1	1	2	0.0049819	121.29	82.486
GPAIAIDLSGINETNDLKR	Unmodified	1996.06	Q14651;C9JAM8	PLS1	Plastin-1	0.42841	0.4123	0.41787	0.5616	2	1	2	3	1.3224e-05	133.71	109.3
PSLETSLSVQLSNLGTVR	Acetyl (N-term)	1942.04	E7EQW4;H0Y8D8;H0Y8B8;E7EUM2	BRCA1		0.4288	NaN	0.4288	NaN		1		3	0.034254	20.048	15.431
FKNKYEDEINKR	Unmodified	1582.81	CON__P05787;P05787;P05787-2;F8VUG2;F8W1U3;F8VP67;CON__Q5XQN5;CON__H-INV:HIT000016045;F8W0C6;CON__Q8VED5;CON__P02538;CON__P13647;P02538;P13647	KRT8;KRT5;KRT6A	Keratin, type II cytoskeletal 8;Keratin, type II cytoskeletal 6A;Keratin, type II cytoskeletal 5	0.42962	1.0171	0.37974	0.41867	3	2	5	2;3;4	0.0067823	128.01	50.271	+
AATLILEPAGR	Unmodified	1110.64	G3V4F2;A0A087X0W7;A0A087WT95;Q86TX2;P49753	ACOT1;ACOT2	Acyl-coenzyme A thioesterase 1;Acyl-coenzyme A thioesterase 2, mitochondrial	0.42974	0.43795	0.38637	0.36488	1	1	1	2	1.2078e-06	147.2	89.61
GESSELQEQMVEQQQR	Unmodified	1904.85	Q7Z406;Q7Z406-6;Q7Z406-2;A0A0C4DFM8;Q7Z406-5;Q7Z406-4	MYH14	Myosin-14	0.4305	NaN	0.4305	0.43216		1	2	3	0.0083241	105.39	55.337
TMVADTPENLR	Unmodified	1245.6	Q14847;C9J9W2;Q14847-2;F6S2S5	LASP1	LIM and SH3 domain protein 1	0.43288	1.7085	0.41149	0.39414	2	1	1	2	0.0052298	109.79	59.317
ALAAGGYDVEKNNSR	Unmodified	1563.76	P16401	HIST1H1B	Histone H1.5	0.43323	0.51441	0.36485	0.34013	2	2	2	2;3	1.1429e-10	154.47	105.81
GGTSLTPAPPQR	Unmodified	1180.62	J3QRV5;Q6P1M3-2;Q6P1M3	LLGL2	Lethal(2) giant larvae protein homolog 2	0.43392	0.43392	NaN	NaN	1			2	0.027455	109.29	47.291
TLSKPSPMPVSQECFETLR	Unmodified	2206.08	P10645;G5E968	CHGA	Chromogranin-A;Vasostatin-1;Vasostatin-2;EA-92;ES-43;Pancreastatin;SS-18;WA-8;WE-14;LF-19;Catestatin;AL-11;GV-19;GR-44;ER-37;GE-25;Serpinin-RRG;Serpinin;p-Glu serpinin precursor	0.43587	NaN	0.43587	NaN		1		3	1.5922e-06	111.63	70.205
AETEALSKLR	Acetyl (N-term)	1158.62	E9PI87;Q9BUP3-2;Q9BUP3;Q9BUP3-3	HTATIP2	Oxidoreductase HTATIP2	0.43673	0.42052	0.43734	0.43673	1	1	1	2	6.7195e-08	61.691	26.253
GKVGAHAGEYGAEALER	Unmodified	1713.84	P69905	HBA1	Hemoglobin subunit alpha	0.43853	0.43853	NaN	NaN	1			3	0.18791	61.962	27.447
VAPNFEANTTVGR	Unmodified	1374.69	P30041	PRDX6	Peroxiredoxin-6	0.4387	0.43781	0.471	0.4387	1	1	1	2	0.0085941	128.81	99.854
SGGGVPTDEEQATGLER	Unmodified	1701.78	P10606	COX5B	Cytochrome c oxidase subunit 5B, mitochondrial	0.44089	0.43918	0.4426	NaN	1	1		2	0.0044067	108.23	65.43
AKPLTDSEKR	Acetyl (N-term)	1185.64	P11216	PYGB	Glycogen phosphorylase, brain form	0.44285	0.44285	0.44109	0.42154	1	1	1	3	1.7596e-06	90.149	22.133
ANTLAEKDEFEHKR	Unmodified	1686.83	A0A0G2JIW1;P0DMV8-2;P0DMV9;P0DMV8;V9GZ37	HSPA1A;HSPA1B	Heat shock 70 kDa protein 1A;Heat shock 70 kDa protein 1B	0.44325	0.48448	0.40553	0.40007	1	1	1	4	0.0092148	98.337	76.477
SVVADTPELQR	Unmodified	1213.63	Q14847;Q14847-3;C9J9W2;Q14847-2	LASP1	LIM and SH3 domain protein 1	0.44487	0.4338	0.45622	NaN	1	1		2	0.12143	77.533	10.734
LAKILSDMR	Unmodified	1045.6	CON__P08727;P08727;K7EMS3	KRT19	Keratin, type I cytoskeletal 19	0.44506	0.44506	NaN	NaN	1			2	0.098333	86.136	27.155	+
EAEGAPQVEAGKR	Unmodified	1340.67	Q05682;C9J813;E9PGZ1;E7EX44;Q05682-5;Q05682-4;Q05682-3;Q05682-6;Q05682-2	CALD1	Caldesmon	0.44619	0.48898	0.44619	0.42477	1	1	1	3	0.0081712	105.03	25.799
SSVPAGMETPELIELR	Unmodified	1727.88	H0YEX5;E9PPJ0;Q13435	SF3B2	Splicing factor 3B subunit 2	0.44668	NaN	0.40678	0.49049		2	1	2	0.018305	92.781	43.15
AINQGMDEELER	Unmodified	1403.64	F8WF02;C9J634;P11177-3;P11177-2;P11177	PDHB	Pyruvate dehydrogenase E1 component subunit beta, mitochondrial	0.44671	0.49181	0.42609	0.44671	1	1	1	2	0.0053442	119.53	62.613
GGDVLFTGR	Unmodified	920.472	O94760;B4DYP1;O94760-2	DDAH1	N(G),N(G)-dimethylarginine dimethylaminohydrolase 1	0.44724	NaN	0.44724	NaN		1		2	0.018343	99.136	8.7657
TSVVLSMDNSR	Unmodified	1207.59	CON__P05787;P05787;P05787-2;F8VUG2;CON__H-INV:HIT000292931;A0A1W2PRP1;CON__Q9DCV7;CON__Q3KNV1;CON__P08729;P08729	KRT8;KRT7	Keratin, type II cytoskeletal 8;Keratin, type II cytoskeletal 7	0.44742	0.42015	1.1186	0.45	1	2	1	2	1.0772e-12	179.1	74.903	+
WYQKQGPGPSR	Unmodified	1302.65	CON__P08727;P08727;CON__P19001	KRT19	Keratin, type I cytoskeletal 19	0.44864	NaN	0.44444	0.69814		2	1	2;3	0.00048111	121.6	70.997	+
VQSVEPVDQR	Unmodified	1155.59	Q14764	MVP	Major vault protein	0.44878	0.48617	0.41427	NaN	1	1		2	0.089832	81.972	37.577
SGAQASSTPLSPTR	Unmodified	1358.68	Q3BDU5;P02545-2;P02545-6;P02545;P02545-3	LMNA	Prelamin-A/C;Lamin-A/C	0.44987	0.40361	0.49547	NaN	4	2		2;3	2.1382e-62	210.95	132.81
SHLIKEAGDAESR	Unmodified	1411.71	P31947	SFN	14-3-3 protein sigma	0.4503	NaN	0.48239	0.42035		1	2	2;3	0.0079677	107.53	47.184
LYANNVLSGGTTMYPGIADR	Unmodified	2112.03	P63267;P68032;P62736;P63267-2	ACTG2;ACTC1;ACTA2	Actin, gamma-enteric smooth muscle;Actin, alpha cardiac muscle 1;Actin, aortic smooth muscle	0.45145	0.45145	0.43095	0.49787	2	2	2	2;3	1.8469e-07	128.96	80.958
DEPPPLPR	Unmodified	919.476	O00264-2;O00264	PGRMC1	Membrane-associated progesterone receptor component 1	0.45154	NaN	0.48281	0.42229		1	1	2	0.20199	82.305	16.502
AAPGLNLGVIMNEMR	2 Oxidation (M)	1616.8	CON__P35900;P35900	KRT20	Keratin, type I cytoskeletal 20	0.4528	NaN	NaN	0.4528			1	2	0.075948	83.869	35.301	+
ELTAAEDAKLR	Unmodified	1215.65	Q7Z406;Q7Z406-6;Q7Z406-2;Q7Z406-4;A1L2Z2	MYH14	Myosin-14	0.45376	NaN	0.45376	NaN		1		3	0.0437	90.05	27.584
ASGANFEYIIAEKR	Unmodified	1567.8	P30084	ECHS1	Enoyl-CoA hydratase, mitochondrial	0.45453	0.43009	0.4511	0.47803	6	5	6	2;3	6.1245e-94	230.69	163.99
TSLMVGPVDEVR	Unmodified	1301.66	C9JH19;H7C469;A0A1B0GW44;A0A1B0GVP3;A0A1B0GV23;A0A1B0GVD5;A0A1B0GWE8;A0A1B0GU92;A0A1B0GU03;P07339;H7C1V0	CTSD	Cathepsin D;Cathepsin D light chain;Cathepsin D heavy chain	0.45484	0.42857	NaN	0.48272	1		1	2	0.010689	128.03	36.966
ENATLDGGDVLFTGR	Unmodified	1563.75	O94760;B4DYP1;O94760-2	DDAH1	N(G),N(G)-dimethylarginine dimethylaminohydrolase 1	0.45556	NaN	0.45556	NaN		1		2	0.070384	84.506	28.248
GAAAILLAR	Unmodified	854.534	C9JDE9;P09110;H7C131	ACAA1	3-ketoacyl-CoA thiolase, peroxisomal	0.45728	0.45728	0.54541	0.40946	1	1	1	2	0.011259	108.24	45.524
TAATGGVFDISNLDR	Unmodified	1535.76	P12532;P12532-2	CKMT1A	Creatine kinase U-type, mitochondrial	0.45744	0.39891	0.45744	0.45894	1	1	1	2	0.0041908	155.88	96.906
TLEGELHDLR	Unmodified	1181.6	Q3BDU5;P02545-2;P02545-6;P02545;Q5TCI8;P02545-5;P02545-4;P02545-3;H0YAB0	LMNA	Prelamin-A/C;Lamin-A/C	0.45781	0.44962	NaN	0.59333	1		2	3	0.0035375	112.85	59.909
AEKFDCHYCR	Acetyl (N-term)	1426.58	Q5JXI2;Q13642-5;Q13642-4;A0A0D9SG53;A0A0D9SGB2;Q5JXI0;A0A0D9SFI6;A0A0D9SFB0;Q5JXH9;A0A0D9SFZ9;Q5JXH8;Q5JXH7;Q5JXI3;Q5JXI8;Q13642-3;Q13642-1;Q13642;A0A0D9SGC5;A0A0D9SEY7;A0A0D9SGD1	FHL1	Four and a half LIM domains protein 1	0.45885	0.46667	0.43327	0.42572	1	1	1	3	0.015718	69.275	29.651
FNLGDALDSSNSMQTIQKTTTR	Unmodified	2427.17	P05783	KRT18	Keratin, type I cytoskeletal 18	0.45939	0.45939	0.44791	0.46072	1	1	1	3	3.5238e-09	153.36	106.27
AAGWVDVDKETLQHR	Unmodified	1723.86	Q9Y6N5;H3BNP9	SQRDL	Sulfide:quinone oxidoreductase, mitochondrial	0.46088	0.5204	0.40863	0.36916	3	1	2	3;4	0.0077375	127.79	85.476
SSDASQGVITTPPPPSMPHKER	Acetyl (N-term)	2360.14	Q9UEY8-2;Q9UEY8	ADD3	Gamma-adducin	0.46092	0.46827	0.3865	1.234	3	3	2	3	3.3938e-12	63.447	51.167
EANTYFKEWTCSSSPSLPR	Unmodified	2259.03	Q8WWA0	ITLN1	Intelectin-1	0.46099	0.46581	0.45622	NaN	1	1		3	0.037209	78.501	45.99
DNFASIVTGVEEGR	Unmodified	1492.72	P05023-3;P05023-4;P05023;M0R116;A0A0A0MT26;P13637;P13637-2;P13637-3;B1AKY9;P50993;Q13733;H0Y7C1;P54707;P54707-2	ATP1A1;ATP1A3;ATP1A2;ATP1A4;ATP12A	Sodium/potassium-transporting ATPase subunit alpha-1;Sodium/potassium-transporting ATPase subunit alpha-3;Sodium/potassium-transporting ATPase subunit alpha-2;Sodium/potassium-transporting ATPase subunit alpha-4;Potassium-transporting ATPase alpha chain 2	0.46306	0.58321	0.41145	0.41226	1	1	2	2;3	0.0072658	103.88	78.444
SSLGSLQTPEAVTTR	Unmodified	1545.8	C9J6P4;Q7Z2W4-3;Q7Z2W4-2;Q7Z2W4	ZC3HAV1	Zinc finger CCCH-type antiviral protein 1	0.46324	NaN	0.43433	0.49407		1	1	2	0.0053979	130.44	64.173
SAGSGPGQYLQR	Unmodified	1219.59	A0A1B0GTL9;A0A1B0GUB8;A0A1B0GUD9;A0A1B0GTM0;A0A1B0GV75;A0A1B0GTB8;A0A1B0GWC0;A0A1B0GVF3;P23786	CPT2	Carnitine O-palmitoyltransferase 2, mitochondrial	0.4639	0.42593	0.50525	NaN	1	1		2	0.046878	89.047	41.445
GVPVEITEKETR	Unmodified	1356.72	B1ALD9;Q15063-4;Q15063-2;Q15063-3;Q15063-5;Q15063;CON__Q2KJC7	POSTN	Periostin	0.46491	0.47487	0.44073	0.47964	1	2	1	2;3	0.0032712	134.98	75.137	+
QTPASTTQAGAPPR	Unmodified	1381.69	H0Y7F0;H0Y9H6;E9PDE4;E7ES10;E9PCH5;E7EVY3;B7Z574;A0A0C4DGB5;P20810-3;P20810-4;P20810-8;P20810-2;P20810;P20810-9;P20810-5;P20810-10;P20810-7;P20810-6;E7EQ12;A0A0A0MR45;E7EQA0;H0YD33;A0A0C4DGD1	CAST	Calpastatin	0.46622	0.46622	NaN	NaN	1		1	2	0.0071129	105.25	81.729
SKDNEGSWFR	Unmodified	1224.55	F8WCR5;H7C2U6;Q9BPW8	NIPSNAP1	Protein NipSnap homolog 1	0.46767	0.42025	0.48782	0.46767	1	1	1	3	6.6837e-05	136.02	88.129
DMENPPADEYFGR	Unmodified	1539.63	Q93052;A0A087WZF1	LPP	Lipoma-preferred partner	0.46918	0.46269	0.46918	0.53929	1	1	1	2	0.0085303	129.88	74.793
STSNIQDALHGQLR	Unmodified	1538.78	Q53GG5-3;Q53GG5-2	PDLIM3	PDZ and LIM domain protein 3	0.47129	NaN	0.47129	NaN		1		3	0.06208	90.707	12.383
GEYTLLAPVNNAFSDDTLSMDQR	Unmodified	2556.18	B1ALD9;Q15063-4;Q15063-2;Q15063-3;Q15063-5;Q15063;CON__Q2KJC7;Q15063-7;Q15063-6	POSTN	Periostin	0.47207	0.44363	0.50234	NaN	1	1		3	6.4463e-13	104.38	74.654	+
SQTQGPPDYPR	Unmodified	1244.58	E9PI78;E9PNF1;Q13405	MRPL49	39S ribosomal protein L49, mitochondrial	0.47246	0.39208	0.56931	NaN	1	1	1	2	0.016066	118.03	65.244
AVYLDNEKER	Unmodified	1235.61	P00488	F13A1	Coagulation factor XIII A chain	0.47289	0.50021	0.44706	NaN	1	1		3	0.10515	103.26	36.904
VIKTDELPAAAPADSAR	Unmodified	1723.91	I3L2B0	CLUH		0.47624	0.58784	0.38582	NaN	1	1		3	0.049601	82.865	45.272
HSLLPVDDAINGLSEEQR	Unmodified	1991.99	A0A0A0MT83;P26440-2;P26440;A0A087WVD3	IVD	Isovaleryl-CoA dehydrogenase, mitochondrial	0.47647	NaN	0.47271	0.48027		1	1	3	1.2893e-05	118.72	67.224
FEPSLGPVCPFR	Unmodified	1404.69	F8VNW0;F8VU58;F8VSI3;F8VX58;F8VXZ8;F8VNV6;F8VUF6;F8VWU0;P07585-5;P07585-4;P07585-3;P07585-2;P07585	DCN	Decorin	0.47699	0.47699	0.44683	0.48482	1	1	1	2	0.034566	91.867	7.8684
SSGQHVDVSPTSQR	Unmodified	1483.7	A2A274;Q99798	ACO2	Aconitate hydratase, mitochondrial	0.47764	0.47764	NaN	NaN	1			2	0.028566	96.756	72.374
GLPVDASSVSNNYIQTLGR	Unmodified	1990.01	C9JZR2;O60716-24;O60716-23;O60716-21;O60716-19;O60716-22;O60716-20;O60716-16;O60716-18;O60716-15;O60716-17;O60716-13;O60716-11;O60716-14;O60716-12;O60716-10;O60716-8;O60716-9;O60716-7;O60716-5;O60716-3;O60716-6;O60716-4;O60716-2;O60716;E9PRE2;E9PKL1	CTNND1	Catenin delta-1	0.47794	0.47794	0.43285	0.69665	1	1	1	3	0.00052889	108.25	72.048
TSVVLSMDNSR	Oxidation (M)	1223.58	CON__P05787;P05787;P05787-2;F8VUG2;CON__H-INV:HIT000292931;A0A1W2PRP1;CON__Q9DCV7;CON__Q3KNV1;CON__P08729;P08729	KRT8;KRT7	Keratin, type II cytoskeletal 8;Keratin, type II cytoskeletal 7	0.47795	0.53468	0.47795	0.41528	1	1	1	2	0.038621	91.265	41.824	+
VDEAYMNKVELESR	Unmodified	1681.8	CON__P05787;P05787;P05787-2;F8VUG2;F8W1U3;CON__H-INV:HIT000292931;F8VP67	KRT8	Keratin, type II cytoskeletal 8	0.47821	0.47821	0.47647	0.58586	5	2	2	2;3	0.0057166	152.16	104.05	+
AQTPVGVSTLEPGQTLLPR	Unmodified	1963.07	C9JWM9;C9JVQ5;O94887-3;O94887-2;O94887	FARP2	FERM, RhoGEF and pleckstrin domain-containing protein 2	0.47971	NaN	NaN	0.47971			1	3	0.00018151	99.273	41.027
AKLSELEAALQR	Unmodified	1327.75	CON__P05787;P05787;P05787-2;CON__H-INV:HIT000292931;CON__Q9H552;CON__REFSEQ:XP_092267	KRT8	Keratin, type II cytoskeletal 8	0.48031	NaN	0.43677	0.5282		1	1	3	0.079647	81.565	35.407	+
LMQLQEDLAAAER	Unmodified	1486.74	P35749-4;P35749-3;P35749;P35749-2	MYH11	Myosin-11	0.48064	NaN	0.48064	NaN	1	1		2	0.0086478	102.52	24.007
GSSAQEEASGVALGEAPDHSYESLR	Unmodified	2546.15	M0QZW4;M0R248;M0QYT0;Q13011	ECH1	Delta(3,5)-Delta(2,4)-dienoyl-CoA isomerase, mitochondrial	0.48104	NaN	0.60719	0.3902	1	2	2	3	4.2676e-28	141.53	106.81
GSVQAPSYGAR	Unmodified	1091.54	P05783;F8VZY9	KRT18	Keratin, type I cytoskeletal 18	0.48241	0.48864	0.48241	0.47958	1	1	1	2	0.00049611	120.99	31.693
SDWFAENYMGR	Unmodified	1374.57	B5MD38;F5GZQ3;P55084-2;P55084	HADHB	Trifunctional enzyme subunit beta, mitochondrial;3-ketoacyl-CoA thiolase	0.48268	0.48268	0.45751	0.56145	1	1	1	2	0.01157	104.42	85.292
SAKPTKPAASDLPVPAEGVR	Unmodified	1990.08	Q05682;C9J813;E9PGZ1;E7EX44;Q05682-5;Q05682-4;Q05682-3;Q05682-6;Q05682-2	CALD1	Caldesmon	0.48338	NaN	0.48338	NaN		1		4	0.033586	73.11	26.146
LQGGMLYPQESPSR	Oxidation (M)	1577.75	F8WBK6;F2Z3L6;P08236-3;P08236-2;P08236	GUSB	Beta-glucuronidase	0.48348	0.48348	NaN	NaN	1			2	0.024589	91.123	39.678
TGTSLMVGPVDEVR	Unmodified	1459.73	C9JH19;H7C469;A0A1B0GW44;A0A1B0GVP3;A0A1B0GV23;A0A1B0GVD5;A0A1B0GWE8;A0A1B0GU92;A0A1B0GU03;P07339;H7C1V0	CTSD	Cathepsin D;Cathepsin D light chain;Cathepsin D heavy chain	0.48524	0.50032	0.48663	0.47061	1	2	1	2	1.0792e-11	176.78	134.03
YEHVTMLQER	Unmodified	1304.62	Q01082;Q01082-2;Q01082-3	SPTBN1	Spectrin beta chain, non-erythrocytic 1	0.48558	NaN	0.48558	NaN		1		3	9.733e-05	112.85	91.616
LDAATQQLLSR	Unmodified	1214.66	P25705;P25705-3;P25705-2	ATP5A1	ATP synthase subunit alpha, mitochondrial	0.48658	0.50492	0.48658	0.48549	1	1	1	2	0.00053306	122.69	50.366
KGTVEGFEPADNKCLLR	Unmodified	1932.97	H0YLA2;P37108	SRP14	Signal recognition particle 14 kDa protein	0.48687	NaN	NaN	0.48687			1	3	0.008054	89.866	65.456
AGEGLLAVQITDQEGKPKR	Unmodified	2009.09	O75369-3;O75369;O75369-8;E7EN95;O75369-5;O75369-4;O75369-7;O75369-6;O75369-2;O75369-9	FLNB	Filamin-B	0.48798	NaN	0.48798	NaN		1		3	0.014043	83.894	35.071
EHIPESPYLVPVIAPSDDAR	Unmodified	2204.11	O75369-3;O75369;O75369-8;E7EN95;O75369-7;O75369-6;O75369-2;O75369-9	FLNB	Filamin-B	0.48806	0.40912	0.63461	0.50301	1	2	1	3	0.0086742	75.743	42.661
EDYYYHPPPR	Unmodified	1335.59	B4DT28;O43390-4;O43390-3;O43390;O43390-2	HNRNPR	Heterogeneous nuclear ribonucleoprotein R	0.48826	0.49354	0.42575	0.48826	1	1	1	3	0.036992	91.265	74.098
ATNWGSLLQDKQQLEELAR	Acetyl (N-term)	2241.14	P48637-2;P48637	GSS	Glutathione synthetase	0.48847	0.48847	0.49517	0.48461	1	1	1	3	0.027375	55.912	48.636
KIGGIGTVPVGR	Unmodified	1152.7	A0A087WVQ9;P68104-2;Q5VTE0;P68104;Q05639	EEF1A1;EEF1A1P5;EEF1A2	Elongation factor 1-alpha 1;Putative elongation factor 1-alpha-like 3;Elongation factor 1-alpha 2	0.48967	NaN	0.48967	NaN		1		3	0.02719	94.465	76.632
SSKAGLAPLEVR	Unmodified	1226.7	O75369-3;O75369;O75369-8;E7EN95;O75369-5;O75369-4;O75369-7;O75369-6;O75369-2;O75369-9	FLNB	Filamin-B	0.49156	NaN	0.49385	0.48929		1	1	3	0.011396	102.33	50.085
GQHVASSPIPVVISQSEIGDASR	Unmodified	2333.2	P21333-2;P21333;Q60FE5;Q5HY54;H0Y5C6	FLNA	Filamin-A	0.49299	0.4865	0.49958	NaN	1	2		3	4.4542e-09	100.85	80.033
ASGGGVPTDEEQATGLER	Unmodified	1772.82	P10606	COX5B	Cytochrome c oxidase subunit 5B, mitochondrial	0.49522	0.49522	0.48122	0.51169	5	2	2	2;3	2.1212e-299	280.62	225.58
GEDFNLGDALDSSNSMQTIQKTTTR	Oxidation (M)	2744.26	P05783	KRT18	Keratin, type I cytoskeletal 18	0.49564	NaN	NaN	0.49564			3	3	0.043131	60.272	31.214
GLDSGKLYTLVLTDPDAPSR	Unmodified	2117.1	P30086	PEBP1	Phosphatidylethanolamine-binding protein 1;Hippocampal cholinergic neurostimulating peptide	0.49592	NaN	0.54092	0.45466		1	1	3	0.004905	84.249	28.128
SLSEWRMQNIAR	Unmodified	1489.75	O00562-2;O00562	PITPNM1	Membrane-associated phosphatidylinositol transfer protein 1	0.49681	NaN	0.49681	NaN		1		2	0.046735	89.08	89.08
CTEAGEGDVSVGIKCDAR	Unmodified	1922.85	O75369-3;O75369;O75369-8;E7EN95;O75369-5;O75369-4;O75369-7;O75369-6;O75369-2;O75369-9	FLNB	Filamin-B	0.49977	0.43767	0.44923	0.5676	3	1	3	2;3	0.00022245	130.66	87.855
GQISSEEPKQEEER	Unmodified	1644.76	Q05682	CALD1	Caldesmon	0.50181	0.50181	0.56227	0.49196	3	1	1	2;3	5.5445e-59	190.85	118.32
AGEYGAEALER	Unmodified	1164.54	P69905	HBA1	Hemoglobin subunit alpha	0.50304	0.50304	0.49962	0.47418	1	1	1	2	0.015806	101.38	33.484
DLTGEPLIQR	Unmodified	1140.61	Q9UIJ7-2;Q9UIJ7-3;Q9UIJ7	AK3	GTP:AMP phosphotransferase AK3, mitochondrial	0.50352	0.414	NaN	0.61241	1		1	2	9.5565e-05	124.08	71.294
GTYAVTYIPDKTGR	Unmodified	1540.79	O75369-3;O75369;O75369-8;E7EN95;O75369-5;O75369-4;O75369-7;O75369-6;O75369-2;O75369-9	FLNB	Filamin-B	0.5048	0.53728	0.47429	0.56115	1	1	2	3	0.0077353	99.669	71.699
SSKTASTNNIAQAR	Acetyl (N-term)	1489.75	Q9UBI6	GNG12	Guanine nucleotide-binding protein G(I)/G(S)/G(O) subunit gamma-12	0.50508	1.1052	NaN	0.44888	3	1	2	2	1.0463e-206	131.42	61.464
DLSKQAVAYR	Unmodified	1149.61	P25705;P25705-3;P25705-2	ATP5A1	ATP synthase subunit alpha, mitochondrial	0.50727	0.5085	0.48866	0.47333	1	1	1	3	0.036992	91.265	39.737
GTDINALVR	Unmodified	957.524	B5MBZ0;Q9HC35-2;Q9HC35	EML4	Echinoderm microtubule-associated protein-like 4	0.50797	0.50797	NaN	NaN	1			2	0.093388	86.833	23.268
SLTPANEDQKIGIEIIKR	Unmodified	2024.13	P10809	HSPD1	60 kDa heat shock protein, mitochondrial	0.50842	0.50842	NaN	NaN	1			4	0.091356	71.263	31.899
MDGAGAEEVLAPLR	Oxidation (M);Acetyl (N-term)	1485.71	P41250;F8WCK4	GARS	Glycine--tRNA ligase	0.50856	0.50856	NaN	NaN	1		2	2	0.0059861	110.93	43.035
VRPASSAASVYAGAGGSGSR	Unmodified	1806.9	CON__P05784			0.5096	NaN	NaN	0.5096			1	3	1.3124e-05	103.71	1.1151	+
SSSLQAPVVSTVGMQR	Unmodified	1645.85	CON__P35900;P35900	KRT20	Keratin, type I cytoskeletal 20	0.50967	0.50967	NaN	NaN	1			2	0.018305	92.781	21.751	+
VLAGVGVLVWRR	Acetyl (N-term)	1365.82	Q95460-3;Q95460-2;Q95460	MR1	Major histocompatibility complex class I-related gene protein	0.50999	0.50731	0.50999	0.51266	2	2	1	2	0.052896	35.152	10.997
GIVLGADTR	Unmodified	900.503	Q5TBG5;Q99436-2;Q99436	PSMB7	Proteasome subunit beta type;Proteasome subunit beta type-7	0.51039	NaN	0.51039	NaN		1		2	0.0211	98.629	2.4389
HDEGYGPPPPHYEGR	Unmodified	1706.74	M0QXS5;P14866-2;P14866	HNRNPL	Heterogeneous nuclear ribonucleoprotein L	0.51063	0.55684	0.50199	0.46826	3	2	3	3;4	0.013134	93.243	69.824
QKTGTAEMSSILEER	Oxidation (M)	1694.81	P25705;P25705-3;K7ERX7;K7ESA0	ATP5A1	ATP synthase subunit alpha, mitochondrial	0.5118	NaN	0.5118	NaN		1		3	0.029138	94.487	66.398
LVLVGGSTR	Unmodified	900.539	A0A0G2JIW1;P0DMV8-2;P0DMV9;P0DMV8;V9GZ37	HSPA1A;HSPA1B	Heat shock 70 kDa protein 1A;Heat shock 70 kDa protein 1B	0.51267	0.56116	0.46837	0.45618	1	1	1	2	0.065422	90.777	0
SQQSSSYGQQSSFR	Unmodified	1575.69	B0QYJ7;F8WC90;B0QYK0;Q01844-4;Q01844-6;Q01844-3;Q01844;Q01844-5	EWSR1	RNA-binding protein EWS	0.5127	0.49828	0.52754	NaN	2	3	3	2	1.5957e-09	162.93	119.29
NAGEEGGEAPQEPQS	Unmodified	1498.62	P31947;P31947-2	SFN	14-3-3 protein sigma	0.51289	0.51289	NaN	NaN	1			2	0.026772	95.417	95.417
TVEAEAAHGTVTR	Unmodified	1340.67	O75874	IDH1	Isocitrate dehydrogenase [NADP] cytoplasmic	0.51347	0.52209	NaN	0.50499	1		1	3	0.029717	105.03	20.86
SAPGTDLAKILSDMR	Oxidation (M)	1589.81	CON__P08727;P08727;K7EMS3	KRT19	Keratin, type I cytoskeletal 19	0.51377	0.53426	0.49407	NaN	1	1		3	0.13361	68.751	15.182	+
AAKNQVALNPQNTVFDAKR	Unmodified	2084.11	A0A0G2JIW1;P0DMV8-2;P0DMV9;P0DMV8	HSPA1A;HSPA1B	Heat shock 70 kDa protein 1A;Heat shock 70 kDa protein 1B	0.51406	0.51568	0.44828	0.51406	1	1	1	4	7.5003e-06	102.36	60.046
SHGSQETDEEFDAR	Unmodified	1606.65	H3BRI0;H3BNX8;P20674	COX5A	Cytochrome c oxidase subunit 5A, mitochondrial	0.51514	0.48954	0.51514	0.53067	2	5	3	2;3	0	318.47	294.75
FSLGFDEPTEQPVR	Unmodified	1620.78	J3KT51;Q9UK76;Q9UK76-2	HN1	Hematological and neurological expressed 1 protein;Hematological and neurological expressed 1 protein, N-terminally processed	0.51558	0.4186	0.63504	NaN	1	1	1	2	0.0039515	147.62	68.553
LWPWPQNFQTSDQR	Unmodified	1801.85	H3BRP6;A0A087WTY2;H3BVH8;H3BT62;H3BQ04;A0A087WUJ7;H3BTD4;H3BS10;H3BP20;P06865	HEXA	Beta-hexosaminidase;Beta-hexosaminidase subunit alpha	0.51627	0.579	0.51229	0.48276	1	1	2	2;3	0.0072296	107.17	90.592
VEKEEAGGGISEEEAAQYDR	Acetyl (N-term)	2207.98	M0QZS6;Q9UBE0;M0R375;B3KNJ4;Q9UBE0-2;Q9UBE0-3	SAE1	SUMO-activating enzyme subunit 1;SUMO-activating enzyme subunit 1, N-terminally processed	0.51746	NaN	0.51746	NaN	1	1		3	0.027156	85.855	31.091
DAILEDLVFPSEIVGKR	Unmodified	1900.03	B5MCP9;P62081	RPS7	40S ribosomal protein S7	0.51955	NaN	0.51955	NaN		1		3	0.014656	89.911	52.828
VNVDEVGGEALGR	Unmodified	1313.66	P68871;F8W6P5	HBB	Hemoglobin subunit beta;LVV-hemorphin-7;Spinorphin	0.51976	0.51976	NaN	NaN	1			2	0.0084978	103.31	56.516
QAVFPQNGLVVSSVDVQSVEPVDQR	Unmodified	2696.38	Q14764	MVP	Major vault protein	0.52134	0.55658	0.48833	NaN	1	1		3	1.4728e-20	112.88	83.151
SAEVGAAETTLTELR	Unmodified	1546.78	P05783;F8VZY9	KRT18	Keratin, type I cytoskeletal 18	0.52192	0.49242	0.56249	0.7661	3	3	3	2;3	0.0013264	114.72	43.107
ASSYSASAEPAR	Unmodified	1195.55	Q9BV79	MECR	Trans-2-enoyl-CoA reductase, mitochondrial	0.52312	NaN	0.52312	NaN		1		2	0.0029657	151.83	74.094
GDVCQDCIQMVTDIQTAVR	Oxidation (M)	2223.99	C9JIZ6;P07602;P07602-2;P07602-3	PSAP	Prosaposin;Saposin-A;Saposin-B-Val;Saposin-B;Saposin-C;Saposin-D	0.52424	0.41557	0.57692	0.68448	4	4	2	2;3	7.2163e-113	212.7	152.27
AGKQAVSASGKWLDGIR	Acetyl (N-term)	1784.95	B7Z2R2;P14927;P14927-2	UQCRB	Cytochrome b-c1 complex subunit 7	0.52444	0.52444	0.50008	0.57127	1	1	2	3	2.3258e-05	84.046	56.792
AATQQLLSR	Unmodified	986.551	P25705;P25705-3;P25705-2	ATP5A1	ATP synthase subunit alpha, mitochondrial	0.52453	0.52453	0.52447	0.54808	1	1	1	2	0.012228	106.6	45.917
LSGAPQASAADVVVVHGR	Unmodified	1732.92	C9JDE9;P09110;F2Z2Q6;F2Z3P7;B4DVF4;P09110-2	ACAA1	3-ketoacyl-CoA thiolase, peroxisomal	0.52483	0.48012	0.59205	0.52483	1	1	1	3	4.6627e-07	162.82	147.32
VEEVATAIGMDQR	Unmodified	1417.69	O60701-3;O60701-2;O60701	UGDH	UDP-glucose 6-dehydrogenase	0.5252	0.52675	0.52366	NaN	1	1		2	0.0082449	110.39	56.419
MIVAAIQAEKNR	Unmodified	1342.74	P07305-2;P07305	H1F0	Histone H1.0;Histone H1.0, N-terminally processed	0.52542	0.52542	NaN	NaN	1			3	0.050039	103.21	49.462
LHLGVTPSVIR	Unmodified	1190.71	O14773	TPP1	Tripeptidyl-peptidase 1	0.52639	0.52044	0.52862	0.52418	2	1	1	3	7.4192e-18	182.46	63.25
SEVVLSGDDEEYQR	Unmodified	1624.72	Q09666;E9PKR9;E9PLK4	AHNAK	Neuroblast differentiation-associated protein AHNAK	0.52666	0.52666	NaN	NaN	2	1		2	0.016596	123.8	82.517
AELQMLLEEEIPSGKR	Oxidation (M);Acetyl (N-term)	1899.96	B6VEX4;A0A0A0MRT6;Q8IZP0-11;Q8IZP0-10;Q8IZP0-8;Q8IZP0-7;Q8IZP0-2;Q8IZP0-4;Q8IZP0-3;Q8IZP0-5;Q8IZP0-6;Q8IZP0-9;Q8IZP0-12;Q8IZP0	ABI1	Abl interactor 1	0.52817	0.52817	NaN	NaN	2			2;3	0.0084332	101.75	66.226
VEEAFGSEVSVR	Acetyl (N-term)	1349.65	P11473-2			0.52842	0.39682	NaN	0.70367	1		1	2	0.030845	26.889	9.453
ELSEEDKLTVSR	Unmodified	1404.71	P06576;F8W079	ATP5B	ATP synthase subunit beta, mitochondrial	0.52867	NaN	0.52867	0.56955		2	1	3	0.0052252	117.98	63.276
FLSDEIKEER	Unmodified	1264.63	Q07021	C1QBP	Complement component 1 Q subcomponent-binding protein, mitochondrial	0.52926	0.52926	NaN	NaN	1			3	0.10412	101.97	41.333
SAAQAAAQTNSNAAGKQLR	Unmodified	1856.95	Q8NC51-4;Q8NC51-3;Q8NC51-2;Q8NC51	SERBP1	Plasminogen activator inhibitor 1 RNA-binding protein	0.52944	0.52944	0.45033	0.59928	1	1	1	3	1.672e-62	204.81	165.83
ETYGEMADCCAKQEPER	Unmodified	2072.82	A0A0C4DGB6;CON__P02768-1;P02768;A0A087WWT3;P02768-3;H7C013	ALB	Serum albumin	0.53088	0.84205	NaN	0.33469	2	1	1	3	0.00040673	116.87	99.118	+
SAPGTDLAKILSDMR	Unmodified	1573.81	CON__P08727;P08727;K7EMS3	KRT19	Keratin, type I cytoskeletal 19	0.53125	0.55414	0.53125	0.51633	2	1	3	2;3	0.0031742	133.48	84.95	+
GGVSYTQGQSPEPR	Unmodified	1461.68	J3KNI2;Q6P1X6	C8orf82	UPF0598 protein C8orf82	0.53143	0.5337	0.52917	NaN	1	1	1	2	5.1576e-10	166.14	106.23
CEVEQWDSDEPIPAKELER	Unmodified	2329.05	U3KQ56;Q9UBQ7	GRHPR	Glyoxylate reductase/hydroxypyruvate reductase	0.53195	0.53149	0.44412	0.64142	2	2	2	3	6.6922e-06	121.01	81.031
STPQENSDGMYR	Oxidation (M)	1399.57	P00488	F13A1	Coagulation factor XIII A chain	0.53455	0.5068	NaN	0.56382	1		1	2	0.017732	112.85	74.092
TINEVENQILTR	Unmodified	1428.76	O43707;F5GXS2;O43707-3;O43707-2;H7C144;P12814-2;P12814;P12814-3;P12814-4;H9KV75;H0YJ11;H0YJW3;H7C5W8	ACTN4;ACTN1	Alpha-actinin-4;Alpha-actinin-1	0.53459	NaN	0.53459	NaN		1		2	0.11191	90.05	10.065
STPQENSDGMYR	Unmodified	1383.57	P00488	F13A1	Coagulation factor XIII A chain	0.53551	0.54264	0.4696	0.45296	1	1	2	2	0.00033704	141.91	85.653
FVGDACKAIASR	Unmodified	1293.65	Q14764	MVP	Major vault protein	0.53586	0.43063	NaN	0.79944	1		2	3	0.084972	80.312	58.917
KNITVEEMNELER	Oxidation (M);Acetyl (N-term)	1661.79	Q5T2Q4	CCNYL2	Cyclin-Y-like protein 2	0.53656	0.53992	0.53034	0.53322	1	2	1	2	0.0079103	60.102	25.896
AHESVVKSEDFSLPAYMDR	Unmodified	2180.02	H3BNI5;Q86WV2;H3BN72;H3BNV9;P13073	COX4I1	Cytochrome c oxidase subunit 4 isoform 1, mitochondrial	0.53713	0.54649	0.53535	0.52058	5	3	9	2;3;4	2.2862e-08	165.66	118.12
ARLGLSESDENCRR	Unmodified	1661.79	Q9UPU5	USP24	Ubiquitin carboxyl-terminal hydrolase 24	0.53826	NaN	0.53826	NaN		1		2	0.01759	93.561	59.671
VYELDAKQGR	Unmodified	1177.61	A0A1B0GV06;A0A1B0GTP7;A0A1B0GUE3;A0A1B0GUG1;A0A1B0GUW4;E7EMM4;A0A1B0GW68;A0A1B0GUA4;A0A1B0GTM3;A0A1B0GTZ5;A0A1B0GUH5;Q13510-3;Q13510;Q13510-2	ASAH1	Acid ceramidase;Acid ceramidase subunit alpha;Acid ceramidase subunit beta	0.5385	0.5385	0.57035	0.5069	1	1	1	3	0.18324	72.243	25.786
QLEQEDKVMTEER	Unmodified	1633.76	Q8N988;Q8N988-2	ZNF557	Zinc finger protein 557	0.53992	0.53992	NaN	NaN	1			2	0.015533	128.03	75.309
GAGGGGSMGDYMAQEDDWDR	Unmodified	2073.78	O43707;F5GXS2;O43707-3;O43707-2;K7EP19	ACTN4	Alpha-actinin-4	0.54136	0.54282	0.5436	0.52359	6	4	3	2;3	1.9406e-102	220.21	196.6
FIVAASNLR	Unmodified	989.566	P22314-2;P22314;Q5JRR6	UBA1	Ubiquitin-like modifier-activating enzyme 1	0.54223	0.54223	NaN	NaN	1			2	0.011987	107.01	30.53
VVLVGGSTR	Acetyl (N-term)	928.534	P17066;P48723	HSPA6;HSPA13	Heat shock 70 kDa protein 6;Heat shock 70 kDa protein 13	0.54314	0.567	NaN	0.52029	1		1	2	0.034387	74.255	10.949
DVKCDMEVSCPDGYTCCR	Unmodified	2250.85	K7EKL3;P28799-3;P28799-2;P28799	GRN	Granulins;Acrogranin;Paragranulin;Granulin-1;Granulin-2;Granulin-3;Granulin-4;Granulin-5;Granulin-6;Granulin-7	0.54373	0.38823	0.54429	0.54373	2	1	1	3	0.0073975	82.877	79.995
CEQAENWMAAR	Unmodified	1364.56	A0A0D9SF54;Q13813-3;Q13813;Q13813-2;A0A0D9SGF6	SPTAN1	Spectrin alpha chain, non-erythrocytic 1	0.54385	0.64142	NaN	0.46112	1		1	2	0.011834	117.02	73.58
TALINSTGEEVAMR	Unmodified	1490.74	Q3BDU5;P02545-2;P02545-6;P02545;Q5TCI8;P02545-5;P02545-4	LMNA	Prelamin-A/C;Lamin-A/C	0.54452	0.54452	NaN	NaN	1			2	0.039293	97.163	24.315
DLEQWIAER	Unmodified	1158.57	Q01082;A0A087WUZ3;Q01082-2;Q01082-3	SPTBN1	Spectrin beta chain, non-erythrocytic 1	0.54599	0.54599	0.65842	0.49954	1	1	1	2	0.0034733	130.75	51.632
SDDDEPPPLPR	Unmodified	1236.56	O00264-2;O00264	PGRMC1	Membrane-associated progesterone receptor component 1	0.54632	0.48193	0.6193	NaN	1	1		2	0.0066405	108.43	66.242
GVINEEALSVTELDR	Unmodified	1643.84	Q8WUM4;Q8WUM4-2	PDCD6IP	Programmed cell death 6-interacting protein	0.54642	0.56233	0.53633	0.53097	4	2	2	2;3	3.763e-52	208.51	129.44
STAVTTSSAKIK	Unmodified	1192.67	Q5QPM1	RALY		0.5494	0.68128	0.44306	NaN	1	1		3	0.0049791	114.76	63.672
AFQNAYLELGGLGER	Unmodified	1636.82	P05023-3;P05023-4;P05023;M0R116;A0A0A0MT26;P13637;P13637-2;P13637-3;P05023-2;Q13733	ATP1A1;ATP1A3;ATP1A4	Sodium/potassium-transporting ATPase subunit alpha-1;Sodium/potassium-transporting ATPase subunit alpha-3;Sodium/potassium-transporting ATPase subunit alpha-4	0.54975	0.54975	NaN	NaN	1			2	0.0016014	113.83	53.763
EEVDEMIR	Oxidation (M)	1035.45	P0DP25;P0DP24;P0DP23;E7ETZ0;H0Y7A7;E7EMB3;Q96HY3;G3V361;P27482	CALM1;CALM2;CALML3	Calmodulin-like protein 3	0.55028	0.52399	0.55028	0.6136	1	1	1	2	0.066231	97.798	28.883
GTTPVCEDIGR	Unmodified	1203.56	P31930	UQCRC1	Cytochrome b-c1 complex subunit 1, mitochondrial	0.55109	NaN	0.55109	NaN		1		2	0.017986	99.815	62.266
SNQTGPAWAGSER	Unmodified	1359.62	P20042	EIF2S2	Eukaryotic translation initiation factor 2 subunit 2	0.55345	0.55103	NaN	0.55587	1		1	2	0.0083841	103.91	68.641
APSVPAAEPEYPKGIR	Unmodified	1680.88	F8VPP1;G3V213;F8VZG5;F8VY04;F8W1A4;P54819-3;P54819-5;P54819-2;P54819	AK2	Adenylate kinase 2, mitochondrial;Adenylate kinase 2, mitochondrial;Adenylate kinase 2, mitochondrial, N-terminally processed	0.55403	0.57305	0.52016	0.5455	5	2	1	3	5.4781e-28	165.78	117.08
GELNVDSLITR	Unmodified	1215.65	C9J9S3;C9JP48;P62140	PPP1CB	Serine/threonine-protein phosphatase;Serine/threonine-protein phosphatase PP1-beta catalytic subunit	0.55424	0.65837	NaN	0.46658	1		1	2	0.055207	87.298	5.9604
DIPLSPYR	Unmodified	959.508	O75369-3;O75369;O75369-8;E7EN95;O75369-5;O75369-4;O75369-7;O75369-6;O75369-2;O75369-9	FLNB	Filamin-B	0.55514	0.55514	0.42937	0.58641	1	1	1	2	0.087247	94.662	22.524
DLVVDLDNQR	Unmodified	1185.6	P35749-4;P35749-3;P35749;P35749-2	MYH11	Myosin-11	0.55597	0.55597	0.55342	0.59061	1	1	1	2	0.018017	98.033	37.443
GEALSTLVLNR	Unmodified	1171.66	P10809	HSPD1	60 kDa heat shock protein, mitochondrial	0.55597	0.58693	0.54358	0.55597	1	1	1	2	2.9408e-145	253.05	129.84
CSKLETLGIGQR	Unmodified	1360.71	Q9NZL9-4;Q9NZL9-2;Q9NZL9	MAT2B	Methionine adenosyltransferase 2 subunit beta	0.55714	0.74918	0.41433	NaN	1	1		3	0.052208	102.66	48.695
TASVEESESTSSAR	Unmodified	1439.64	H0YAC6;E9PEM5;P50851-2;P50851	LRBA	Lipopolysaccharide-responsive and beige-like anchor protein	0.55741	0.55741	0.85307	0.53489	2	1	1	2	4.2014e-37	197.73	150.92
ASESGKLWGGR	Acetyl (N-term)	1188.59	P04424-3;P04424-2;P04424	ASL	Argininosuccinate lyase	0.55807	0.5723	NaN	0.5442	1		1	2	1.0033e-07	116.05	49.019
DETIPSEYR	Unmodified	1108.5	H0Y7F0;H0Y9H6;E9PDE4;E7ES10;E9PCH5;E7EVY3;B7Z574;A0A0C4DGB5;P20810-3;P20810-4;P20810-8;P20810-2;P20810;P20810-9;P20810-5;P20810-10;P20810-7;P20810-6;F8W7E0;E7EQ12;D6RAA8;A0A0A0MR45;E7EQA0;H0YD33	CAST	Calpastatin	0.55816	NaN	0.44804	0.69534		1	1	2	0.12388	82.75	35.553
LRDKILGATIENSR	Unmodified	1584.89	CON__P08727;P08727	KRT19	Keratin, type I cytoskeletal 19	0.55885	NaN	0.55885	NaN		1		3	0.061706	85.287	79.784	+
GQQASSQNEGLTIDLKNFR	Unmodified	2105.05	Q15233;C9JJ13;C9J4X2;C9IZL7;C9JYS8	NONO	Non-POU domain-containing octamer-binding protein	0.55956	0.52179	0.5577	0.5718	2	1	1	3	0.00073537	96.805	72.694
TSVDLEETGR	Unmodified	1105.53	P25705;P25705-3;P25705-2;K7ERX7;K7ESA0;K7EQH4;K7EJP1;K7EK77	ATP5A1	ATP synthase subunit alpha, mitochondrial	0.56002	0.55157	0.56002	0.6056	1	1	1	2	0.008576	109.44	69.892
SGAPIKIPVGPETLGR	Unmodified	1590.91	P06576;F8W079;H0YH81	ATP5B	ATP synthase subunit beta, mitochondrial;ATP synthase subunit beta	0.56034	0.61513	0.63515	0.48583	1	3	2	3	0.00014896	162.7	121.32
AEAWFTSR	Unmodified	966.456	CON__P08727;P08727;K7EMS3	KRT19	Keratin, type I cytoskeletal 19	0.56094	NaN	0.54776	0.57444		1	1	2	0.012002	135.77	85.135	+
TAVIQGDTALITR	Unmodified	1357.76	A0A140T971;Q5SSV3;Q5SRR8;O95865	DDAH2	N(G),N(G)-dimethylarginine dimethylaminohydrolase 2	0.56267	0.43982	0.56267	0.5722	1	1	1	2	0.091151	76.843	24.588
SKKISGGSVVEMQGDEMTR	Acetyl (N-term)	2079.99	O75874;C9JJE5;C9JLU6;C9J4N6	IDH1	Isocitrate dehydrogenase [NADP] cytoplasmic	0.56294	0.68766	0.57662	0.50595	4	2	1	2;3	1.6292e-15	148.52	87.353
FETEDFDVR	Unmodified	1156.5	G3XAM7;P35221-3;P35221;P35221-2	CTNNA1	Catenin alpha-1	0.56298	NaN	0.56298	NaN		1		2	0.041691	94.85	28.777
STAVYSATPVPTPSLPER	Unmodified	1871.96	H0YG82;P82673-2;P82673	MRPS35	28S ribosomal protein S35, mitochondrial	0.56359	0.54482	0.58302	NaN	2	2	2	2	0.00025436	138.42	82.299
TSAVSSSGSPASVMTNMR	Oxidation (M)	1784.8	Q15714-4;Q15714	TSC22D1	TSC22 domain family protein 1	0.5656	0.59235	0.54006	NaN	1	1		2	0.013658	80.014	22.841
SAPVIFDR	Unmodified	903.481	D6RC15;O60749-2;O60749	SNX2	Sorting nexin-2	0.5659	0.5659	0.55821	0.63291	1	1	1	2	0.13052	89.142	33.701
KILGATIENSR	Unmodified	1200.68	CON__P08727;P08727	KRT19	Keratin, type I cytoskeletal 19	0.56672	0.55998	0.56672	0.5961	1	1	1	3	9.1486e-09	167.11	100.19	+
ATLTVEAR	Unmodified	859.476	B1AQN8;A0A087WYK2;Q9BYP7-3;Q9BYP7-4;Q9BYP7-2;Q9BYP7	WNK3	Serine/threonine-protein kinase WNK3	0.56722	NaN	0.56722	NaN		1		2	0.053797	111.65	8.8749
VITAIDGENTSNMTHLEAQNR	Unmodified	2313.1	O00151	PDLIM1	PDZ and LIM domain protein 1	0.56723	0.68995	0.57541	0.6162	2	3	2	3	2.6593e-08	130.56	76.552
RKESLDVYELDAKQGR	Unmodified	1905.99	A0A1B0GV06;A0A1B0GTP7;A0A1B0GUE3;A0A1B0GUG1;A0A1B0GUW4;E7EMM4;A0A1B0GW68;A0A1B0GUA4;A0A1B0GTM3;A0A1B0GTZ5;A0A1B0GUH5;Q13510-3;Q13510;Q13510-2	ASAH1	Acid ceramidase;Acid ceramidase subunit alpha;Acid ceramidase subunit beta	0.56793	NaN	NaN	0.56793			1	4	0.040193	82.925	29.886
SNPFDDDATSGTEVR	Unmodified	1609.69	A0A0U1RR22;Q9UNF0-2;Q9UNF0	PACSIN2	Protein kinase C and casein kinase substrate in neurons protein 2	0.56811	NaN	0.56811	NaN		1		2	0.048856	88.552	28.034
LYANTVLSGGTTMYPGIADR	Acetyl (N-term)	2141.05	P63261;P60709	ACTG1;ACTB	Actin, cytoplasmic 2;Actin, cytoplasmic 2, N-terminally processed;Actin, cytoplasmic 1;Actin, cytoplasmic 1, N-terminally processed	0.56844	0.56844	NaN	NaN	1			3	0.079242	32.091	19.898
DTIYEDEDVKEAIR	Unmodified	1694.8	B7Z2R2;P14927;P14927-2;E5RHG9	UQCRB	Cytochrome b-c1 complex subunit 7	0.57104	0.48178	0.67684	NaN	1	1		3	0.0086859	110.38	93.81
QTKAQAAAPASVPAQAPKR	Unmodified	1890.04	P47914	RPL29	60S ribosomal protein L29	0.57172	NaN	0.57172	NaN		1		4	0.011977	84.375	54.884
NLTLWTADNAGEEGGEAPQEPQS	Unmodified	2413.07	P31947;P31947-2	SFN	14-3-3 protein sigma	0.57197	0.57197	NaN	NaN	2			3	0.082273	54.869	34.838
AVVVGAGGAGLR	Unmodified	1025.6	A0A087X1I3;D6RFM5;P31040-3;P31040-2;P31040	SDHA	Succinate dehydrogenase [ubiquinone] flavoprotein subunit, mitochondrial	0.57256	0.59067	0.57256	0.49965	1	1	1	2	0.0053247	119.27	48.75
GVPAGNSDTEGGQPGR	Unmodified	1497.68	S4R3H4;E7EQT4;Q9UKV3-5;Q9UKV3;G3V3T3;G3V3B0;Q9UKV3-3;Q9UKV3-2	ACIN1	Apoptotic chromatin condensation inducer in the nucleus	0.57337	0.49967	0.58342	0.57337	2	3	2	2	4.2221e-09	173.04	134.32
MIGEEVPSDQYYWAPLAQHER	Unmodified	2518.16	C9JZR2;O60716-24;O60716-23;O60716-21;O60716-19;O60716-22;O60716-20;O60716-16;O60716-18;O60716-15;O60716-17;O60716-13;O60716-11;O60716-14;O60716-12;O60716-10;O60716-8;O60716-9;O60716-7;O60716-5;O60716-3;O60716-6;O60716-4;O60716-2;O60716;O60716-32;O60716-31;O60716-29;O60716-27;O60716-30;O60716-28;O60716-26;O60716-25;E9PKY0	CTNND1	Catenin delta-1	0.5734	0.5734	NaN	NaN	1			3	0.025955	73.448	39.174
TEGAELVDSVLDVVR	Unmodified	1600.83	Q5JP53;P07437;A0A0B4J269;Q13509;Q5ST81;G3V2A3;Q13509-2;P68371;Q9BVA1;Q13885	TUBB;TUBB3;TUBB4B;TUBB2B;TUBB2A	Tubulin beta chain;Tubulin beta-3 chain;Tubulin beta-4B chain;Tubulin beta-2B chain;Tubulin beta-2A chain	0.5762	0.5199	0.62007	0.55392	2	2	2	2;3	0.0084286	106.49	49.144
CKIQNGAQGIR	Unmodified	1243.65	D6RF17;D6RDL0;E7EQJ0;D6RAM1;D6R9T0;D6RFM3;D6RIT2;E7EN40;D6RIU0;D6RDU3;D6RJ04;D6RIH9;D6RBM0;E9PCY7;G8JLB6;P31943	HNRNPH1	Heterogeneous nuclear ribonucleoprotein H;Heterogeneous nuclear ribonucleoprotein H, N-terminally processed	0.57744	0.71699	0.5386	NaN	2	1		2;3	8.1312e-07	148.56	86.997
SGNKPPGLLPR	Unmodified	1134.65	C9JNT3;E9PFN5;Q9Y2Q3-3;Q9Y2Q3;Q9Y2Q3-2	GSTK1	Glutathione S-transferase kappa 1	0.5778	0.59384	0.5622	NaN	1	1		3	0.034767	92.538	76.909
AAPDEKVLDSGFR	Unmodified	1403.7	P01833	PIGR	Polymeric immunoglobulin receptor;Secretory component	0.57918	0.61082	0.54918	0.54065	1	1	1	3	0.16345	68.83	44.759
AWITAPVALR	Unmodified	1096.64	Q14126;J3KSI6	DSG2	Desmoglein-2	0.57937	NaN	0.57937	NaN		1		2	0.093304	81.548	26.998
SHTDIKVPDFSEYR	Unmodified	1692.81	P47985;P0C7P4	UQCRFS1;UQCRFS1P1	Cytochrome b-c1 complex subunit Rieske, mitochondrial;Cytochrome b-c1 complex subunit 11;Putative cytochrome b-c1 complex subunit Rieske-like protein 1	0.58073	0.5816	0.59017	0.55394	4	4	7	3;4	4.1377e-25	150.14	131.47
ASSEYQQELER	Unmodified	1338.61	A8MUH2;P18859;P18859-2	ATP5J	ATP synthase-coupling factor 6, mitochondrial	0.58088	1.1827	0.45398	0.58818	2	1	1	2	0.00068965	125.97	103.88
EVQLVESGGGVVR	Unmodified	1327.71	A0A0C4DH32	IGHV3-20		0.5824	0.53389	0.5824	0.70545	2	1	1	2	0.022111	104.79	13.211
SEPEQQEGASAGAPSPTLELASR	Unmodified	2311.09	Q96CX2	KCTD12	BTB/POZ domain-containing protein KCTD12	0.58304	0.54902	0.58832	0.51655	1	1	1	3	2.121e-14	110.91	69.821
VDLEPTVIDEVR	Unmodified	1383.72	Q71U36-2;Q71U36;P68363;F5H5D3;Q9BQE3;F8VVB9;F8VQQ4;P68363-2;A0A1W2PQM2;F8VRK0;F8VX09;F8VWV9;F8VRZ4;F8VS66	TUBA1A;TUBA1B;TUBA1C	Tubulin alpha-1A chain;Tubulin alpha-1B chain;Tubulin alpha-1C chain	0.58337	0.58337	0.59056	0.54966	1	1	1	2	9.4588e-05	153.1	97.99
TYGEMADCCAKQEPER	Unmodified	1943.78	A0A0C4DGB6;CON__P02768-1;P02768;A0A087WWT3;P02768-3;H7C013	ALB	Serum albumin	0.58379	0.58379	NaN	0.60431	2		2	3	7.2994e-05	164.41	120.72	+
GASSSTANVEDVHAR	Unmodified	1499.7	O43719;Q5H919;Q5H918	HTATSF1	HIV Tat-specific factor 1	0.58399	0.66427	0.58399	0.52787	1	1	1	3	3.2244e-07	170.26	101.73
SIAAHLDNQVPVESPR	Unmodified	1731.89	V9GYL4;V9GY11;V9GYJ9;V9GYL9;P51398-3;P51398	DAP3	28S ribosomal protein S29, mitochondrial	0.58406	NaN	0.67119	0.50824		1	1	3	0.0059415	125.39	86.224
SDEPIPAKELER	Unmodified	1382.7	U3KQ56;Q9UBQ7	GRHPR	Glyoxylate reductase/hydroxypyruvate reductase	0.58491	NaN	0.58491	NaN		1		3	0.19755	68.069	31.765
MDQVMQFVEPSR	2 Oxidation (M);Acetyl (N-term)	1539.67	P60059	SEC61G	Protein transport protein Sec61 subunit gamma	0.58494	NaN	0.99221	0.34484		2	2	2	0.042895	105.03	62.314
GPNEDGEMFMR	Unmodified	1281.51	P08574	CYC1	Cytochrome c1, heme protein, mitochondrial	0.58702	0.58702	0.54625	0.57711	1	1	1	2	0.056879	86.898	76.375
TIPIVPTAEFQDR	Unmodified	1485.78	P00367;P00367-2;P00367-3	GLUD1	Glutamate dehydrogenase 1, mitochondrial	0.58721	0.58721	NaN	NaN	1			2	0.10762	74.841	32.505
SSAEELKLATQLTGPVMPVR	Unmodified	2126.14	P26373;P26373-2	RPL13	60S ribosomal protein L13	0.58782	0.58782	NaN	NaN	1			3	0.095874	56.719	25.607
GVAVLKVGGTSDVEVNEKKDR	Unmodified	2199.19	P10809	HSPD1	60 kDa heat shock protein, mitochondrial	0.58846	0.72083	0.4804	NaN	1	1		5	0.020339	78.501	28.076
IITKFLENEDR	Unmodified	1376.73	A0A0G2JRN3;A0A024R6I7;P01009-3;P01009-2;P01009	SERPINA1	Alpha-1-antitrypsin;Short peptide from AAT	0.58948	0.58948	NaN	NaN	1			3	0.0049312	110.08	63.918
MDPSGVKVLETAEDIQER	Acetyl (N-term)	2057.99	A0A0D9SF54;Q13813-3;Q13813;Q13813-2;A0A0D9SGF6;A0A1B0GTB7;A0A0D9SFF6	SPTAN1	Spectrin alpha chain, non-erythrocytic 1	0.58987	0.55416	0.62788	NaN	1	1		3	0.011558	84.829	52.639
GTTDYQVEETSR	Unmodified	1384.61	O43719	HTATSF1	HIV Tat-specific factor 1	0.59074	0.58076	NaN	0.60091	1		1	2	0.012794	100.55	55.393
GEGCVDENECQTKPGICENGR	Unmodified	2407.98	P35555;H0YND0	FBN1	Fibrillin-1	0.59106	0.59106	0.57403	0.78343	2	1	1	3	3.1422e-05	91.414	70.061
GKTLNDELEIIEGMKFDR	Oxidation (M)	2123.06	P10809;E7EXB4;E7ESH4	HSPD1	60 kDa heat shock protein, mitochondrial	0.5916	0.5641	1.2844	0.59483	2	1	4	3;4	0.00112	99.273	38.106
AVDTYIPVPAR	Unmodified	1200.65	P49411	TUFM	Elongation factor Tu, mitochondrial	0.59213	0.63868	NaN	0.54897	1		1	2	1.799e-09	172.23	116.86
VTTSEYEKEKLNER	Unmodified	1724.86	P10809	HSPD1	60 kDa heat shock protein, mitochondrial	0.59215	0.59215	0.47331	0.59275	1	1	1	4	0.17033	67.019	55.975
GLQFPVGR	Unmodified	872.487	Q93077;Q7L7L0;P04908;A0A0U1RR32;A0A0U1RRH7;Q99878;Q96KK5;Q9BTM1;Q16777;Q8IUE6;Q6FI13;P20671;P0C0S8;P16104;Q9BTM1-2;C9J0D1;Q71UI9-5;Q71UI9-2;Q71UI9;P0C0S5;Q96QV6	HIST1H2AC;HIST3H2A;HIST1H2AB;HIST1H2AJ;HIST1H2AH;H2AFJ;HIST2H2AC;HIST2H2AB;HIST2H2AA3;HIST1H2AD;HIST1H2AG;H2AFX;H2AFV;H2AFZ;HIST1H2AA	Histone H2A type 1-C;Histone H2A type 3;Histone H2A type 1-B/E;Histone H2A type 1-J;Histone H2A type 1-H;Histone H2A.J;Histone H2A type 2-C;Histone H2A type 2-B;Histone H2A type 2-A;Histone H2A type 1-D;Histone H2A type 1;Histone H2AX;Histone H2A;Histone H2A.V;Histone H2A.Z;Histone H2A type 1-A	0.59488	0.59488	NaN	NaN	1			2	0.15847	86.086	19.052
TYIPVPAR	Unmodified	915.518	P49411	TUFM	Elongation factor Tu, mitochondrial	0.59638	0.64811	NaN	0.54878	1		1	2	0.16511	85.359	25.001
GEVVLTSR	Unmodified	859.476	Q6ZU64	CCDC108	Coiled-coil domain-containing protein 108	0.5968	0.6205	0.57401	NaN	1	1		2	0.05163	101.6	29.723
SGITLSKAGQGSGSR	Unmodified	1404.73	A4FU01-3;A4FU01-2;A4FU01-5;A4FU01-6;A4FU01-4;A4FU01	MTMR11	Myotubularin-related protein 11	0.59681	0.59681	NaN	NaN	1			2	0.030388	88.338	28.274
VVVIPAGVPR	Unmodified	1005.63	P40926-2;P40926	MDH2	Malate dehydrogenase, mitochondrial	0.5982	0.58364	0.5982	0.62644	2	1	2	2	0.02804	94.262	33.502
GDVCQDCIQMVTDIQTAVR	Unmodified	2208	C9JIZ6;P07602;P07602-2;P07602-3	PSAP	Prosaposin;Saposin-A;Saposin-B-Val;Saposin-B;Saposin-C;Saposin-D	0.59969	0.37904	0.64449	1.0215	4	4	2	2;3	1.0224e-62	207.08	161.01
AGQSAAGAAPGGGVDTR	Unmodified	1441.69	P21333-2;P21333;Q5HY54	FLNA	Filamin-A	0.60049	0.54638	0.64401	0.60049	1	1	1	2	0.00010658	159.66	128.37
FASTVEALEEGKKR	Unmodified	1563.83	P35749-4;P35749-3;P35749;P35749-2	MYH11	Myosin-11	0.60077	0.50615	0.60077	0.78163	1	1	1	4	0.11193	75.89	36.711
QLTALTGR	Unmodified	858.492	P40926-2;P40926;G3XAL0	MDH2	Malate dehydrogenase, mitochondrial;Malate dehydrogenase	0.60186	0.58598	0.61087	0.52074	1	1	1	2	0.06066	98.629	37.657
FSLPAYMDR	Unmodified	1098.52	H3BNI5;Q86WV2;H3BN72;H3BNV9;P13073	COX4I1	Cytochrome c oxidase subunit 4 isoform 1, mitochondrial	0.60244	0.60244	0.5894	0.91666	1	1	1	2	0.087264	87.696	58.547
GMMDITDTYKFQEGQEEER	Unmodified	2305.98	P00488	F13A1	Coagulation factor XIII A chain	0.60268	0.60268	0.63768	0.63866	3	2	3	3	9.9174e-08	135.23	80.982
SDLELHPPSYPWSHR	Unmodified	1819.86	P08574	CYC1	Cytochrome c1, heme protein, mitochondrial	0.60366	0.61483	0.56148	0.61485	4	6	3	4	0.0054917	124.81	82.386
VAALSDGYWVVSNR	Unmodified	1535.77	O14773;O14773-2	TPP1	Tripeptidyl-peptidase 1	0.60406	0.57126	0.63874	NaN	1	1		3	0.11959	67.019	40.889
TAKSLQPLAPR	Unmodified	1180.69	Q14764	MVP	Major vault protein	0.60422	0.46303	0.62229	0.60422	1	1	1	3	0.0061515	108.9	58.099
TPENNPDTPFDFTPENYKR	Unmodified	2281.03	E7EPT4;P19404	NDUFV2	NADH dehydrogenase [ubiquinone] flavoprotein 2, mitochondrial	0.60447	0.68225	NaN	0.53555	1		1	3	0.0031023	89.661	42.571
RPLKCDEPILSNR	Unmodified	1596.84	P30086	PEBP1	Phosphatidylethanolamine-binding protein 1;Hippocampal cholinergic neurostimulating peptide	0.60561	0.59232	0.59126	0.6192	1	2	3	3;4	0.021393	94.688	38.119
IKVPDFSEYR	Unmodified	1252.65	P47985;P0C7P4	UQCRFS1;UQCRFS1P1	Cytochrome b-c1 complex subunit Rieske, mitochondrial;Cytochrome b-c1 complex subunit 11;Putative cytochrome b-c1 complex subunit Rieske-like protein 1	0.60918	0.58033	0.63946	NaN	1	1		3	0.053793	82.489	54.312
ADLQNDEVAFR	Unmodified	1276.6	D6RED7;D6RAS7;H0Y8L7;D6RB09;E9PFI5;D6RG13;D6RAT0;P61247;D6RGE0;D6RI02	RPS3A	40S ribosomal protein S3a	0.60951	0.63773	0.53614	0.60951	1	1	1	2	0.00078643	129.7	45.755
AAAGAPLPR	Unmodified	822.471	J3QRP6;O14745	SLC9A3R1	Na(+)/H(+) exchange regulatory cofactor NHE-RF1	0.61174	0.78572	0.59035	0.61174	1	1	1	2	0.010018	110.34	41.853
FSLADAVNQEFLTTR	Unmodified	1710.86	P17661	DES	Desmin	0.61211	0.61211	NaN	NaN	1			2	0.066012	111.52	44.14
LEKEELAEELASSLSGR	Unmodified	1859.95	P35749-4;P35749-3;P35749;P35749-2	MYH11	Myosin-11	0.61224	0.77383	0.61224	0.55403	1	1	1	3	0.0039647	100.04	50.732
GGGDISVKELGTVMR	Acetyl (N-term)	1559.8	C9J7T9;P02585	TNNC2	Troponin C, skeletal muscle	0.61267	0.62499	NaN	0.6006	1		1	2	0.011805	56.359	14.911
TTTPIKLLAVAATAPPDAPNR	Unmodified	2117.18	P18206-2;P18206	VCL	Vinculin	0.61306	NaN	0.61306	NaN		1		3	0.029167	71.148	24.654
RVTDALNATR	Unmodified	1115.6	P10809	HSPD1	60 kDa heat shock protein, mitochondrial	0.61462	0.595	0.62199	0.65619	2	2	1	2;3	0.047609	75.416	13.766
VTPEQALAHEEVKTR	Unmodified	1706.9	A0A0J9YXZ5;P46940;H0YLE8	IQGAP1	Ras GTPase-activating-like protein IQGAP1	0.61478	0.8598	0.43959	NaN	1	1		4	0.12167	69.345	35.042
TLMTVKQYESAR	Unmodified	1425.73	P53367-3;P53367-2;P53367	ARFIP1	Arfaptin-1	0.61486	0.61486	NaN	NaN	1			3	0.09885	92.943	44.202
IITTPQEVSLQDVR	Unmodified	1597.87	P53384-2;P53384;I3L3A0	NUBP1	Cytosolic Fe-S cluster assembly factor NUBP1	0.61745	0.61745	0.64095	0.56196	1	1	1	2	0.1614	67.456	13.113
STGTFVVSQPLNYR	Unmodified	1567.8	P49189	ALDH9A1	4-trimethylaminobutyraldehyde dehydrogenase	0.61778	0.61778	NaN	NaN	4			2	0.0050664	112.13	49.052
ALVASQYGWSGNMER	Unmodified	1667.77	P14625;Q58FF3	HSP90B1;HSP90B2P	Endoplasmin;Putative endoplasmin-like protein	0.61851	0.61851	NaN	NaN	1	1	3	2	0.003956	136.96	73.883
GPSPEEVEQQKR	Unmodified	1382.68	P50552	VASP	Vasodilator-stimulated phosphoprotein	0.61903	NaN	0.61903	NaN		1		3	0.011171	116.55	60.142
LQGGMLYPQESPSR	Unmodified	1561.76	F8WBK6;F2Z3L6;P08236-3;P08236-2;P08236	GUSB	Beta-glucuronidase	0.61986	0.62105	0.60777	0.61986	1	1	1	2	0.0023894	146.16	77.606
AQKTASYYSPYGQR	Unmodified	1618.77	Q8WWA0	ITLN1	Intelectin-1	0.62082	NaN	0.58116	0.66318		1	1	3	0.057749	85.909	60.461
ADCISEPVNR	Unmodified	1159.53	E7EM56;F5GYK7;P43304	GPD2	Glycerol-3-phosphate dehydrogenase;Glycerol-3-phosphate dehydrogenase, mitochondrial	0.62092	0.61147	1.3438	0.62092	1	1	1	2	0.011333	107.57	48.593
LLCEGHNNGALQWLPKFYTR	Unmodified	2416.21	M0QZY3	RYR1		0.62143	0.62143	NaN	NaN	1			3	0.049477	61.102	46.197
KALAAGGYDVEKNNSR	Unmodified	1691.86	P16401	HIST1H1B	Histone H1.5	0.62276	0.63728	0.55727	0.44806	1	1	1	4	0.0087885	93.243	55.054
ASGAYNPYIEIIEQPR	Acetyl (N-term)	1861.92	Q04864-2;Q04864	REL	Proto-oncogene c-Rel	0.6229	0.6229	NaN	NaN	1	1	1	2	1.9129e-05	145.17	107.14
EEASGFIHEDHLR	Unmodified	1538.71	P24844	MYL9	Myosin regulatory light polypeptide 9	0.62414	NaN	0.62414	NaN		2		3;4	0.038349	101.39	59.811
QKTGTAEMSSILEER	Unmodified	1678.82	P25705;P25705-3;K7ERX7;K7ESA0	ATP5A1	ATP synthase subunit alpha, mitochondrial	0.62495	0.63369	0.59392	0.56349	1	2	2	3	0.0031102	156.72	124.65
MELVQVLKR	Acetyl (N-term)	1156.66	F8VXI1;F8VRD8;Q9UI09-2;Q9UI09	NDUFA12	NADH dehydrogenase [ubiquinone] 1 alpha subcomplex subunit 12	0.62537	0.63715	NaN	0.61381	1		1	2	0.0051486	76.1	37.308
GYPGGSDNYGSLSR	Unmodified	1428.63	C9JZR2;O60716-24;O60716-23;O60716-21;O60716-19;O60716-22;O60716-20;O60716-16;O60716-18;O60716-15;O60716-17;O60716-13;O60716-11;O60716-14;O60716-12;O60716-10;O60716-8;O60716-9;O60716-7;O60716-5;O60716-3;O60716-6;O60716-4;O60716-2;O60716;E9PRE2	CTNND1	Catenin delta-1	0.62554	0.62961	0.5402	0.62554	1	1	1	2	0.1058	77.674	32.694
GNTYPNECVLCFENR	Unmodified	1871.79	D6RIU5;P00995	SPINK1	Pancreatic secretory trypsin inhibitor	0.62611	NaN	NaN	0.62611	1		1	2	0.012718	119.76	77.553
ALAAAGYDVEKNNSR	Unmodified	1577.78	P16403;P10412;P16402;P22492;Q02539	HIST1H1C;HIST1H1E;HIST1H1D;HIST1H1T;HIST1H1A	Histone H1.2;Histone H1.4;Histone H1.3;Histone H1t;Histone H1.1	0.62634	0.60075	0.60489	0.82893	4	2	3	2;3	4.805e-161	249.32	187.04
CLKGCDVVVIPAGVPR	Unmodified	1738.92	P40926-2;P40926	MDH2	Malate dehydrogenase, mitochondrial	0.62661	0.79511	0.62389	1.2064	2	3	1	3	0.00031904	107.35	43.639
AVQTVTGGLR	Unmodified	1000.57	Q9H223	EHD4	EH domain-containing protein 4	0.62668	0.6435	0.61029	NaN	1	1		2	8.8283e-05	127.68	26.395
AKPLTDQEKR	Acetyl (N-term)	1226.66	E9PK47;P06737-2;P06737	PYGL	Alpha-1,4 glucan phosphorylase;Glycogen phosphorylase, liver form	0.62774	0.62774	0.64891	1.4874	1	2	2	2;3	4.285e-20	83.869	44.084
EVGQEDEAESDIFSIR	Unmodified	1822.82	Q07021;I3L3Q7;I3L3B0	C1QBP	Complement component 1 Q subcomponent-binding protein, mitochondrial	0.62899	0.54979	1.3487	0.62899	1	1	2	2;3	0.00027127	113.52	62.271
TINEPILLCR	Unmodified	1227.66	O43776	NARS	Asparagine--tRNA ligase, cytoplasmic	0.62905	NaN	0.62905	NaN		1		2	0.15495	98.033	14.768
ALTEPSPDIEGEIKR	Unmodified	1653.86	E7EVA0;P27816-5;P27816-2;P27816-6;P27816;A0A0J9YVV8;A0A0J9YW37;H7C456;P27816-7	MAP4	Microtubule-associated protein;Microtubule-associated protein 4	0.63002	NaN	0.62177	0.63837	2	1	1	3	0.0099082	97.631	52.351
EEMEAKQNLER	Unmodified	1375.64	P35749-4;P35749-3;P35749;P35749-2	MYH11	Myosin-11	0.6302	0.59689	0.6302	0.64486	1	1	2	2;3	0.066123	84.687	31.087
ADEIAKAQVAR	Acetyl (N-term)	1212.65	D6RC06;D6REP8;D6RE99;D6RD60;P49773	HINT1	Histidine triad nucleotide-binding protein 1	0.63196	0.63196	0.62733	0.63565	1	1	1	2	3.9346e-35	132.76	18.477
AVGAAEKATR	Unmodified	972.535	Q8NDA2-4;Q8NDA2-2;Q8NDA2	HMCN2	Hemicentin-2	0.63367	NaN	NaN	0.63367			1	2	0.023661	95.909	23.679
GENTSNMTHLEAQNR	Unmodified	1700.75	O00151	PDLIM1	PDZ and LIM domain protein 1	0.63414	0.84073	0.53918	0.63414	2	2	4	2;3	4.4374e-182	247.73	182.1
GTLSTLEFQR	Unmodified	1150.6	E9PSI1;E9PQI5;E9PQ80;Q9BY43;Q9BY43-2	CHMP4A	Charged multivesicular body protein 4a	0.63486	0.66112	NaN	0.60964	1		1	2	0.01285	106.42	0
TGTSLMVGPVDEVR	Oxidation (M)	1475.73	C9JH19;H7C469;A0A1B0GW44;A0A1B0GVP3;A0A1B0GV23;A0A1B0GVD5;A0A1B0GWE8;A0A1B0GU92;A0A1B0GU03;P07339;H7C1V0	CTSD	Cathepsin D;Cathepsin D light chain;Cathepsin D heavy chain	0.63672	0.63115	0.64235	NaN	1	1		2	0.0028479	115	63.728
DEDDEEEEEEEEEEPVKEAPGKR	Unmodified	2745.13	P19338	NCL	Nucleolin	0.63674	NaN	NaN	0.63674			1	4	0.1495	57.045	36.749
AQGGQQTWAPER	Unmodified	1327.63	P21333-2;P21333;Q60FE5;A0A087WWY3;H0Y5F3	FLNA	Filamin-A	0.63694	0.63694	NaN	NaN	1			2	0.044067	89.679	43.55
ADLSLADALTEPSPDIEGEIKR	Acetyl (N-term)	2381.2	E7EVA0;P27816-5;P27816-2;P27816-6;P27816;A0A0J9YVV8;A0A0J9YW37;H7C456;P27816-7	MAP4	Microtubule-associated protein;Microtubule-associated protein 4	0.63702	0.58947	0.63702	0.64557	1	1	1	3	2.9523e-09	100.02	74.837
AEADVASLNR	Unmodified	1044.52	F5H7S3;H7BYY1;H0YK48;B7Z596;P09493-5;H0YKX5;H0YKP3;H0YNC7;H0YL52;Q5TCU3;CON__Q3SX28;Q5TCU8;Q6ZN40;P09493-2;P07951-3;P09493-9;P09493-8;P09493-7;P09493-6;P09493-4;P09493-3;P09493-10;P09493;P07951-2;P07951	TPM1;TPM2	Tropomyosin alpha-1 chain;Tropomyosin beta chain	0.63715	0.62544	0.63715	0.66475	1	1	1	2	7.6497e-07	142.92	74.93	+
TYQHPPKDSSGQHVDVSPTSQR	Unmodified	2450.16	A2A274;Q99798	ACO2	Aconitate hydratase, mitochondrial	0.63844	0.46537	0.69349	0.63844	1	1	1	4	0.021407	76.027	36.015
RLASYLDKVR	Unmodified	1219.7	CON__P08727;P08727;C9JM50;CON__P19001;CON__Q04695;CON__Q9QWL7;Q04695;K7EPJ9;CON__P08730-1;CON__P19012;CON__A2A4G1;CON__P02533;CON__P08779;CON__Q99456;CON__P13645;P19012;P02533;P08779;Q99456;P13645	KRT19;KRT17;KRT15;KRT14;KRT16;KRT12;KRT10	Keratin, type I cytoskeletal 19;Keratin, type I cytoskeletal 17;Keratin, type I cytoskeletal 15;Keratin, type I cytoskeletal 14;Keratin, type I cytoskeletal 16;Keratin, type I cytoskeletal 12;Keratin, type I cytoskeletal 10	0.64001	0.76148	0.53792	NaN	1	1		3	0.00025654	120.77	52.84	+
TNPSQDVTVPCPVPPPPPCCHPR	Unmodified	2608.2	A0A0G2JMB2			0.6403	NaN	0.85227	0.48105		1	1	3	0.0003209	81.665	56.791
TYTVAYVPDVTGR	Unmodified	1440.72	P21333-2;P21333;Q60FE5;Q5HY54;A0A087WWY3	FLNA	Filamin-A	0.64182	0.68931	0.5976	NaN	1	1		2	0.066609	94.363	42.601
GFGTESMTHADAQDR	Unmodified	1621.68	Q53GG5-3;Q53GG5-2;A0A0A0MQY0;Q53GG5	PDLIM3	PDZ and LIM domain protein 3	0.64264	0.77858	0.64264	0.59258	1	1	1	3	0.053962	83.633	52.418
TTFNIQDGPDFQDR	Unmodified	1652.74	F8WDN2;Q99757	TXN2	Thioredoxin, mitochondrial	0.64338	0.64338	0.66798	0.59415	2	1	1	2	9.9259e-94	229.29	134.93
LLADAVAVTMGPKGR	Unmodified	1497.83	P10809;E7EXB4;E7ESH4;C9JL25;P10809-2;C9JL19;C9JCQ4	HSPD1	60 kDa heat shock protein, mitochondrial	0.64344	NaN	0.64344	NaN		1	1	3	0.050566	101.45	44.346
GTITTKELGTVMR	Unmodified	1405.76	P0DP25;P0DP24;P0DP23;E7ETZ0;H0Y7A7;E7EMB3;M0QZ52;F8WBR5;G3V479	CALM1;CALM2;CALM3		0.64405	0.6449	0.68883	0.64405	2	5	5	2;3	1.5684e-110	212.09	176.65
AAVDLEKLR	Acetyl (N-term)	1055.6	P17858;F8WEU2	PFKL	ATP-dependent 6-phosphofructokinase, liver type	0.64529	0.63359	0.64529	0.54675	1	1	1	2	0.0031926	78.516	43.692
ASLSLAPVNIFKAGADEER	Acetyl (N-term)	2029.05	F5GWF6;P78371;F8VQ14	CCT2	T-complex protein 1 subunit beta	0.64531	0.61651	NaN	0.67546	1		1	2	8.534e-05	49.595	36.587
SPGILSGEKQR	Unmodified	1170.64	Q9H223	EHD4	EH domain-containing protein 4	0.6463	0.6931	0.60266	NaN	1	1		3	0.059194	86.344	37.264
GFFQLEELPGR	Unmodified	1291.66	E5RI06;P00390-5;P00390-4;P00390-2;P00390-3;P00390	GSR	Glutathione reductase, mitochondrial	0.64651	0.64651	0.6444	0.70335	1	1	1	2	5.7141e-05	142.83	76.476
VDLEPGTMDSVR	Unmodified	1317.62	Q5JP53;P07437;A0A0B4J269;Q13509;Q9BUF5;K7EK43;K7ESQ3;G3V5W4;K7EQT3;K7EJ64;K7ERA8;K7EJZ4;G3V2R8;A0A075B724;K7EL29;K7EN98;K7EPE5;G3V3R4;G3V2N6;Q3ZCM7;P68371;P04350;M0R0X0;M0QY85;M0QY37;M0QX14;M0QZL7;M0R278;Q9BVA1;Q13885	TUBB;TUBB3;TUBB6;TUBB8;TUBB4B;TUBB4A;TUBB2B;TUBB2A	Tubulin beta chain;Tubulin beta-3 chain;Tubulin beta-6 chain;Tubulin beta-8 chain;Tubulin beta-4B chain;Tubulin beta-4A chain;Tubulin beta-2B chain;Tubulin beta-2A chain	0.64652	NaN	NaN	0.64652			1	2	0.21339	80.706	39.589
TAVNAAMESCDR	Unmodified	1323.55	P17858;P17858-2	PFKL	ATP-dependent 6-phosphofructokinase, liver type	0.64658	0.63436	NaN	0.65904	1		2	2	0.0058864	121.9	83.595
TQELLQEETR	Unmodified	1245.62	P35749-4;P35749-3;P35749;P35749-2;P35580;P35580-5;P35580-2;P35580-3;P35580-4	MYH11;MYH10	Myosin-11;Myosin-10	0.64751	0.64751	0.64194	0.75083	1	1	1	2	0.00061178	119.22	50.841
ANVNQAPLWCLVLR	Unmodified	1652.88	Q9Y3M8-5;Q9Y3M8-2			0.64756	NaN	NaN	0.64756			1	2	0.0532	86.624	41.86
FGPGVAFR	Unmodified	849.45	CON__P08727;P08727;C9JM50	KRT19	Keratin, type I cytoskeletal 19	0.64934	0.56172	0.6993	0.73465	2	1	2	2	2.035e-15	134.12	73.437	+
NLGDALDSSNSMQTIQKTTTR	Unmodified	2280.1	P05783	KRT18	Keratin, type I cytoskeletal 18	0.64994	NaN	0.64994	NaN	1	1		3	0.053494	67.645	28.26
CHYPEDEVGQEDEAESDIFSIR	Unmodified	2624.1	Q07021;I3L3Q7;I3L3B0	C1QBP	Complement component 1 Q subcomponent-binding protein, mitochondrial	0.65085	0.54172	0.65085	0.71586	1	1	1	3	3.1864e-12	130.25	94.825
DQVSGPPSAPAEDR	Unmodified	1424.65	Q92734-4;Q92734-3;Q92734-2;Q92734	TFG	Protein TFG	0.65109	0.81989	0.51705	NaN	1	1		2	0.00045508	142.89	105.42
AVAVTMGPKGR	Unmodified	1085.6	P10809;E7EXB4;E7ESH4;C9JL25;P10809-2;C9JL19;C9JCQ4	HSPD1	60 kDa heat shock protein, mitochondrial	0.65169	0.83808	0.64748	0.65593	2	1	1	3	1.0263e-08	166.34	70.305
SQAEFEKAAEEVR	Acetyl (N-term)	1534.73	P07108;P07108-6	DBI	Acyl-CoA-binding protein	0.65205	0.62233	0.66239	0.64294	1	5	2	2;3	3.6449e-233	125.68	29.017
SSSLSAEAIR	Unmodified	1019.52	Q01082;A0A087WUZ3;Q01082-2;Q01082-3	SPTBN1	Spectrin beta chain, non-erythrocytic 1	0.65463	0.65463	NaN	NaN	1			2	0.12155	99.802	32.633
TLFGDKLCTVATLR	Unmodified	1593.85	A0A0C4DGB6;CON__P02768-1;P02768;A0A087WWT3;P02768-3;H7C013	ALB	Serum albumin	0.65472	0.65723	0.63	0.63174	1	2	2	2;3	0.0092669	97.779	63.084	+
MEKTLETVPLER	Oxidation (M);Acetyl (N-term)	1502.77	P22626;A0A087WUI2	HNRNPA2B1	Heterogeneous nuclear ribonucleoproteins A2/B1	0.65497	NaN	0.64038	0.6699		1	1	2	0.0083089	53.569	29.104
DEDSLSSAYIQR	Unmodified	1382.63	O14773;O14773-2	TPP1	Tripeptidyl-peptidase 1	0.65573	NaN	NaN	0.65573			1	2	0.0071753	108.67	82.729
TKKVPQVSTPTLVEVSR	Unmodified	1868.07	A0A0C4DGB6;CON__P02768-1;P02768;B7WNR0;C9JKR2;H0YA55;D6RHD5;P02768-2;A0A087WWT3;P02768-3	ALB	Serum albumin	0.65714	NaN	NaN	0.65714			1	4	0.00012158	107.34	59.161	+
AGGAAQLALDKSDSHPSDALTR	Unmodified	2180.08	J3QKU9;K7EJW8;K7EQP4;P49748;P49748-3	ACADVL	Very long-chain specific acyl-CoA dehydrogenase, mitochondrial	0.6572	0.67756	0.68075	0.63594	2	3	3	3;4	2.5146e-07	100.01	82.927
TGPEVAQPEVDTTLGR	Unmodified	1668.83	H3BUA3;A0A0C4DFY7;Q6UWW8	CES3	Carboxylic ester hydrolase;Carboxylesterase 3	0.65788	0.71576	0.65233	0.65788	1	1	1	2	0.0013491	102.73	66.203
LEIGPGQLSSSTFDSEKNESR	Unmodified	2280.09	F8VRN8;Q9UHB6;Q9UHB6-4;F8VQE1;Q9UHB6-2;Q9UHB6-5	LIMA1	LIM domain and actin-binding protein 1	0.658	NaN	0.658	NaN		1		3	0.12805	61.561	20.304
EEEAIQLDGLNASQIR	Unmodified	1784.89	P14625;Q96GW1;A0A1W2PRR1	HSP90B1	Endoplasmin	0.65937	0.67333	0.6457	NaN	2	1	1	2	0.0011774	125.61	49.469
SHPSWLPPKSTGEPLGHVPAR	Acetyl (N-term)	2291.18	Q93052;C9JUT4;C9JE51;C9J2R5;C9JIY7;C9JT42;C9J3U9;C9J1K7;C9J5C8;C9J4E3	LPP	Lipoma-preferred partner	0.65983	0.23702	0.65637	0.67041	2	6	4	3;4	2.6673e-06	70.837	57.21
AIAAKEKDIQEESTFSSR	Unmodified	2009.01	C9JCA9;B8ZZ38;A0A0C4DG06;P42704	LRPPRC	Leucine-rich PPR motif-containing protein, mitochondrial	0.66264	1.0118	0.66264	0.4745	2	2	2	3;4	6.3493e-06	106.19	61.388
LPVGFGGWQAVDSTPQENSDGMYR	Unmodified	2610.18	P00488	F13A1	Coagulation factor XIII A chain	0.66409	0.66409	1.0011	0.49236	1	1	1	3	5.5188e-07	89.511	61.098
VANNTNEEAGDGTTTATVLAR	Unmodified	2104	P10809;E7EXB4;E7ESH4;C9JL25;P10809-2	HSPD1	60 kDa heat shock protein, mitochondrial	0.66413	0.65813	0.72225	0.6471	5	5	4	2;3	0	260.49	212.38
ISSGTVLSDYVGSGPPKGTGLHR	Unmodified	2284.18	P30086	PEBP1	Phosphatidylethanolamine-binding protein 1;Hippocampal cholinergic neurostimulating peptide	0.66506	0.65909	0.6719	0.61353	1	2	1	4	7.7624e-07	90.442	60.014
GDKAFVDFLSDEIKEER	Unmodified	1996.97	Q07021	C1QBP	Complement component 1 Q subcomponent-binding protein, mitochondrial	0.66697	0.64062	0.67888	0.69308	1	2	2	3;4	0.0055731	92.427	84.113
ESGRGSRGRGR	Unmodified	1173.61	Q9Y6R9	CCDC61	Coiled-coil domain-containing protein 61	0.6682	0.63335	0.74949	0.65259	2	2	2	2	0.025645	96.342	31.921
SAELSSEGIR	Unmodified	1047.52	E7EQR4;P15311	EZR	Ezrin	0.66858	0.67073	0.65195	0.66858	1	1	1	2	2.3371e-11	155.58	106.16
SASVVAPLAPGSEDNFAR	Unmodified	1786.88	A0A0G2JS82;O94973;O94973-2	AP2A2	AP-2 complex subunit alpha-2	0.67046	0.67046	0.73768	0.62853	2	1	2	2	1.8433e-06	107.65	50.471
LFEGKDMAAVQR	Unmodified	1363.69	Q01995;H0YCU9	TAGLN	Transgelin	0.67094	NaN	0.65163	0.69082		1	1	3	0.071867	83.397	11.196
ASGVAVSDGVIKVFNDMKVR	Acetyl (N-term)	2133.13	E9PS23;E9PP50;E9PK25;P23528	CFL1	Cofilin-1	0.67136	0.75244	0.70456	0.19498	4	4	3	3	9.5998e-10	109.42	72.337
IVGGQEAPR	Unmodified	925.498	A0A0C4DFZ7;J3QTS8;A0A087WUI4;A0A087X1U0;Q9BZJ3-2;Q9BZJ3;Q15661-2;Q15661;P20231	TPSD1;TPSAB1;TPSB2	Tryptase delta;Tryptase alpha/beta-1;Tryptase beta-2	0.67175	0.67175	0.67816	0.65144	1	1	1	2	0.050884	93.162	41.375
TAGPEAALEAEEWVSGR	Unmodified	1771.84	Q9BR76	CORO1B	Coronin-1B	0.67218	0.65196	0.74109	0.68734	3	3	2	2;3	0.016006	89.231	48.122
SLGSVQAPSYGAR	Unmodified	1291.65	P05783;F8VZY9	KRT18	Keratin, type I cytoskeletal 18	0.67323	0.67323	0.70678	0.70824	3	3	2	2	8.3612e-12	179.94	134.85
GAVAEDGDELR	Unmodified	1130.52	G3V2D9;G3V5D9;A0A0C4DGK8;G3V3C7;G3V5Q1;G3V3M6;P27695	APEX1	DNA-(apurinic or apyrimidinic site) lyase;DNA-(apurinic or apyrimidinic site) lyase, mitochondrial	0.67327	0.85213	0.58329	0.59549	2	1	1	2	0.00068765	131.62	76.84
GGEEVLISGEFNDLR	Unmodified	1633.79	Q16698-2;Q16698	DECR1	2,4-dienoyl-CoA reductase, mitochondrial	0.6739	0.6739	NaN	NaN	1	1		2	0.0013131	114.76	33.289
GDGQVNYEEFVQMMTAK	Unmodified	1945.86	P0DP25;P0DP24;P0DP23;E7ETZ0;H0Y7A7;E7EMB3;M0QZ52;Q96HY3	CALM1;CALM2;CALM3		0.67398	0.67398	0.60875	0.80247	2	1	1	2;3	0.0021831	127.71	90.731
EEVDEMIR	Unmodified	1019.46	P0DP25;P0DP24;P0DP23;E7ETZ0;H0Y7A7;E7EMB3;Q96HY3;G3V361;P27482	CALM1;CALM2;CALML3	Calmodulin-like protein 3	0.67789	0.67204	0.67789	0.69515	1	1	1	2	5.3293e-10	152.47	54.998
AKGISQEQMQEFR	Oxidation (M)	1566.75	O43707;F5GXS2;O43707-3;O43707-2;H7C144	ACTN4	Alpha-actinin-4	0.67884	NaN	0.67884	NaN		1		3	0.1761	68.171	43.242
CVVVVNPQTKR	Unmodified	1298.71	Q13151	HNRNPA0	Heterogeneous nuclear ribonucleoprotein A0	0.67909	0.67909	NaN	NaN	1			3	0.00066526	117.52	51.678
RISGLIYEETR	Unmodified	1335.71	P62805	HIST1H4A	Histone H4	0.67959	NaN	0.67959	NaN		1		3	0.19331	69.216	31.616
GKDYLALNEDLR	Unmodified	1405.72	Q8MH48;Q5RJ85;A0A0G2JPQ3;P17693	HLA-G	HLA class I histocompatibility antigen, alpha chain G	0.67987	0.75365	0.53598	NaN	3	1		2;3	0.013287	118.61	0
GSSFDLDYDFQR	Unmodified	1448.62	G3V5X6;G3V3K6;G3V251;G3V4W0;B4DY08;B2R5W2;G3V4C1;P07910-4;P07910-2;G3V2D6;G3V5V7	HNRNPC	Heterogeneous nuclear ribonucleoproteins C1/C2	0.68064	0.67321	NaN	0.68816	1		2	2	0.0013161	136.52	105.9
DYDDMSPR	Unmodified	997.381	P61978-3;P61978;P61978-2;Q5T6W2	HNRNPK	Heterogeneous nuclear ribonucleoprotein K	0.68263	0.68263	0.68651	0.61719	1	1	1	2	0.10194	92.47	23.295
SEEGETEEDDQDSSHSSVTTVKAR	Unmodified	2622.12	H0YD16;A0A0A0MSK5;J3KN66;Q5JTV8;Q5JTV8-3;Q5JTV8-2	TOR1AIP1	Torsin-1A-interacting protein 1	0.68402	NaN	NaN	0.68402			1	4	2.0326e-09	113.51	93.218
ATAEEEGEFEEEAEEEVA	Unmodified	1996.79	P68371	TUBB4B	Tubulin beta-4B chain	0.68407	0.68046	0.61498	0.70207	3	1	3	2	3.1304e-06	138.22	99.259
GEDAAQAEKFQHPGSDMR	Acetyl (N-term)	2014.88	O95810	SDPR	Serum deprivation-response protein	0.68445	0.68445	0.68403	0.83879	1	1	1	3	0.00030234	61.692	34.429
TTPSYVAFTDTER	Unmodified	1486.69	A0A0G2JIW1;P0DMV8-2;P0DMV9;P0DMV8;E9PKE3;P11142;P11142-2;E9PNE6;Q53FA3;P34931;E9PQQ4;E9PQK7;E9PK54;E9PLF4;E9PN25;E9PPY6;E9PI65;P17066;P48741	HSPA1A;HSPA1B;HSPA8;HSPA1L;HSPA6;HSPA7	Heat shock 70 kDa protein 1A;Heat shock 70 kDa protein 1B;Heat shock cognate 71 kDa protein;Heat shock 70 kDa protein 1-like;Heat shock 70 kDa protein 6;Putative heat shock 70 kDa protein 7	0.68488	0.68488	NaN	NaN	1			2	0.074899	82.171	54.842
MDWVMKHNGPNDASDGTVR	Acetyl (N-term)	2170.95	P31942-2;P31942	HNRNPH3	Heterogeneous nuclear ribonucleoprotein H3	0.68762	0.7519	0.62967	0.80035	2	3	2	3	0.018066	81.51	27.437
ATEGDVELELETETSGPERPPEKPR	Acetyl (N-term)	2807.35	J3QT56;Q9NX55-3;Q9NX55	HYPK	Huntingtin-interacting protein K	0.68772	NaN	0.68772	NaN	1	1		3	1.8499e-09	57.798	43.113
VTYDGSPVPSSPFQVPVTEGCDPSR	Unmodified	2677.23	P21333-2;P21333;Q60FE5;Q5HY54;A0A087WWY3	FLNA	Filamin-A	0.68791	0.68791	NaN	NaN	1			3	0.00088921	83.905	41.556
AVTGEFTGMPEQWAR	Unmodified	1678.78	Q13177;E9PKH9;B3KNX7;Q13153;Q13153-2	PAK2;PAK1	Serine/threonine-protein kinase PAK 2;PAK-2p27;PAK-2p34;Non-specific serine/threonine protein kinase;Serine/threonine-protein kinase PAK 1	0.6888	0.86395	0.6888	NaN	2	2		2	0.0080747	120.03	90.107
LQEDLDSER	Unmodified	1103.51	P35749-4;P35749-3;P35749;P35749-2	MYH11	Myosin-11	0.6895	0.6895	NaN	NaN	1			2	0.16021	78.264	16.156
ANEEKINAVVETGR	Unmodified	1528.78	Q01082;A0A087WUZ3;Q01082-2;Q01082-3	SPTBN1	Spectrin beta chain, non-erythrocytic 1	0.69042	0.69042	NaN	NaN	1	1		2;3	0.01678	94.023	46.984
AQELYAAGENR	Unmodified	1220.58	P50995-2;P50995	ANXA11	Annexin A11	0.69232	0.69232	0.69721	0.43747	1	1	1	2	0.0005777	123.63	91.305
MLGTEGGEGFVVKVR	Oxidation (M);Acetyl (N-term)	1635.83	D6RF17;D6RDL0;E7EQJ0;D6RAM1;D6R9T0;D6RFM3;D6RIT2;E7EN40;D6RIU0;D6RDU3;D6RJ04;D6RIH9;D6RBM0;E9PCY7;G8JLB6;P31943;E5RJ94;D6R9D3;E5RGV0	HNRNPH1	Heterogeneous nuclear ribonucleoprotein H;Heterogeneous nuclear ribonucleoprotein H, N-terminally processed	0.69269	0.68245	0.71138	0.70309	1	3	1	2	0.0017606	120.77	104.24
SVPAAEPEYPKGIR	Unmodified	1512.79	F8VPP1;G3V213;F8VZG5;F8VY04;F8W1A4;P54819-3;P54819-5;P54819-2;P54819	AK2	Adenylate kinase 2, mitochondrial;Adenylate kinase 2, mitochondrial;Adenylate kinase 2, mitochondrial, N-terminally processed	0.69298	0.69298	NaN	NaN	1			3	0.11995	70.438	24.522
EVVQIFDKEG	Unmodified	1162.59	P30085-2;P30085	CMPK1	UMP-CMP kinase	0.69482	0.69482	0.63777	0.74016	1	1	1	2	0.021056	96.89	58.597
YSHYYTTIQDLR	Unmodified	1558.74	CON__P08727;P08727	KRT19	Keratin, type I cytoskeletal 19	0.69512	0.63029	0.7338	0.80036	2	1	2	3	0.0049791	114.76	91.779	+
MENPPADEYFGR	Unmodified	1424.6	Q93052;A0A087WZF1	LPP	Lipoma-preferred partner	0.69651	0.69651	NaN	NaN	1			2	0.11892	88.495	20.272
GEASGESEPAKGSEEAKGR	Unmodified	1874.86	G3XAL9;P55011-3;P55011	SLC12A2	Solute carrier family 12 member 2	0.69797	0.68679	0.74244	0.69797	1	1	1	4	0.0066218	81.428	72.012
TSGVQCYGPGIEGQGVFR	Unmodified	1910.89	P21333-2;P21333;Q60FE5;Q5HY54;A0A087WWY3	FLNA	Filamin-A	0.69849	0.77462	0.76237	0.62249	2	3	2	2	2.3238e-09	164.68	117.12
GVVEITGKHEER	Unmodified	1352.7	P04792	HSPB1	Heat shock protein beta-1	0.6993	0.55476	0.76367	0.60864	2	2	3	2;3	5.7496e-07	167.84	88.352
IYTGLPVDIDECR	Unmodified	1549.74	P35555;H0YND0	FBN1	Fibrillin-1	0.70007	0.68811	0.71224	NaN	1	1		2	0.072373	83	55.258
GTIVEKYLR	Unmodified	1077.62	H7C0X5;Q9H3G5	CPVL	Probable serine carboxypeptidase CPVL	0.70017	0.70017	NaN	NaN	1			3	0.021358	98.582	28.984
DLDYDFQR	Unmodified	1070.47	G3V5X6;G3V3K6;G3V251;G3V4W0;B4DY08;B2R5W2;G3V4C1;P07910-4;P07910-2;G3V555;G3V575;G3V2D6;G3V576;G3V2Q1;P07910;G3V5V7;P07910-3	HNRNPC	Heterogeneous nuclear ribonucleoproteins C1/C2	0.70059	0.81549	NaN	0.60187	1		1	2	0.13052	89.142	24.878
GFGIDTCR	Unmodified	924.412	U3KQE2;K7EM73;K7EIV0;A0A075B7C0;K7ELJ7;A0A0C4DGQ5;P04632;U3KPR7;K7EKD8	CAPNS1	Calpain small subunit 1	0.70093	0.74081	0.66319	0.65366	1	1	1	2	0.049097	102.72	65.698
TGYTPDEKLR	Unmodified	1178.59	A0A087WZX2;O95139-2;O95139	NDUFB6	NADH dehydrogenase [ubiquinone] 1 beta subcomplex subunit 6	0.70427	0.7317	NaN	0.67787	1		1	3	0.035612	91.549	46.181
SYGGYKEPAAPVSIQR	Unmodified	1721.87	Q14847;Q14847-3;C9J9W2;Q14847-2;J3KSN1	LASP1	LIM and SH3 domain protein 1	0.70443	NaN	0.71551	0.69353		1	1	3	0.087691	74.783	32.228
SCAPGLCPDWDSWDASKPVTNAR	Unmodified	2589.14	P21333-2;P21333;Q60FE5;Q5HY54;A0A087WWY3;F8WE98	FLNA	Filamin-A	0.70467	0.587	0.70467	0.78802	2	1	2	3	2.3492e-15	123.43	93.704
GNLEEDFITWR	Unmodified	1378.65	H0Y4R2;P16435	POR	NADPH--cytochrome P450 reductase	0.70544	0.73314	0.67878	NaN	1	1		2	0.028302	112.36	64.489
GSWEVIEGYR	Unmodified	1194.57	P00367;P49448	GLUD1;GLUD2	Glutamate dehydrogenase 1, mitochondrial;Glutamate dehydrogenase 2, mitochondrial	0.7056	0.77272	0.65107	0.7056	1	1	1	2	9.6608e-09	150.36	100.94
DAHKSEVAHR	Unmodified	1148.57	A0A0C4DGB6;CON__P02768-1;P02768;B7WNR0;C9JKR2;P02768-2;A0A087WWT3;P02768-3;H7C013	ALB	Serum albumin	0.70823	0.65247	0.69364	0.78244	1	3	6	3	0.0071428	125.97	90.061	+
AEDIVNTAR	Unmodified	987.499	O43707	ACTN4	Alpha-actinin-4	0.70825	0.68452	0.70825	0.61526	1	1	1	2	0.010526	109.48	27.238
QIQLTQAQLEER	Unmodified	1455.77	Q6NZI2-2;Q6NZI2	PTRF	Polymerase I and transcript release factor	0.71	0.69753	0.73373	0.71	1	1	1	2	0.0051157	112.83	86.895
TECCHGDLLECADDR	Unmodified	1849.7	A0A0C4DGB6;CON__P02768-1;P02768;B7WNR0;C9JKR2;H0YA55;D6RHD5;P02768-2	ALB	Serum albumin	0.71077	0.7154	0.72686	0.70454	4	3	4	2;3	3.0293e-26	178.15	137.56	+
DMAAAMKAVTEQGHELSNEER	Unmodified	2316.05	P31946-2;P31946;Q4VY20;Q4VY19;A0A0J9YWE8	YWHAB	14-3-3 protein beta/alpha;14-3-3 protein beta/alpha, N-terminally processed	0.71112	0.71112	NaN	NaN	1			3	0.012537	68.134	57.266
TITTKELGTVMR	Unmodified	1348.74	P0DP25;P0DP24;P0DP23;E7ETZ0;H0Y7A7;E7EMB3;M0QZ52;F8WBR5;G3V479	CALM1;CALM2;CALM3		0.71123	NaN	0.57751	0.87591		1	1	3	0.21179	67.252	25.568
TFNLEKQNHTPR	Unmodified	1483.75	Q15233;C9JJ13;C9J4X2;C9IZL7;C9JYS8	NONO	Non-POU domain-containing octamer-binding protein	0.71209	NaN	NaN	0.71209			1	4	0.13546	73.273	28.847
GDGTITTKELGTVMR	Unmodified	1577.81	P0DP25;P0DP24;P0DP23;E7ETZ0;H0Y7A7;E7EMB3;M0QZ52;F8WBR5;G3V479	CALM1;CALM2;CALM3		0.71253	0.71253	0.73367	0.77789	7	3	7	2;3	3.1657e-186	249.28	189.21
TGYTPDEKLR	Acetyl (N-term)	1220.6	A0A087WZX2;O95139-2;O95139	NDUFB6	NADH dehydrogenase [ubiquinone] 1 beta subcomplex subunit 6	0.71262	0.71262	0.68627	0.73714	1	1	1	2	0.01417	73.233	47.128
SYKVSTSGPR	Unmodified	1080.56	CON__P05787;P05787;P05787-2;F8VUG2;F8W1U3;F8VQY3	KRT8	Keratin, type II cytoskeletal 8	0.71267	0.71267	0.48855	0.66704	1	1	1	3	3.0244e-06	140.17	110.79	+
ASGATFTWTPSSGKSAVQGPPER	Unmodified	2318.13	A0A0G2JMB2;P01877	IGHA2	Ig alpha-2 chain C region	0.71288	0.66349	0.70474	0.72112	2	3	3	3	3.2953e-41	188.04	169.01
GIVMPTNPKSTR	Unmodified	1299.7	A0A087WY82;Q9Y624-2;Q9Y624	F11R	Junctional adhesion molecule A	0.71346	0.71346	0.6621	0.79551	1	1	1	3	0.01053	103.43	59.663
DQTMCLDINECER	Unmodified	1682.67	P35555;H0YND0	FBN1	Fibrillin-1	0.71431	0.71431	NaN	NaN	1			2	0.017942	138.71	76.41
ASGVAVSDGVIKVFNDMKVR	Oxidation (M);Acetyl (N-term)	2149.12	E9PS23;E9PP50;E9PK25;P23528	CFL1	Cofilin-1	0.7154	4.505	0.7026	0.72843	2	1	4	3	7.6137e-06	58.712	26.162
RADLNQGIGEPQSPSR	Unmodified	1723.86	Q96C19	EFHD2	EF-hand domain-containing protein D2	0.71732	0.69909	0.71732	0.84829	1	1	1	3	0.0084413	98.552	50.374
GTYTVAYVPDVTGR	Unmodified	1497.75	P21333-2;P21333;Q60FE5;Q5HY54;A0A087WWY3	FLNA	Filamin-A	0.71762	0.73345	0.68224	0.72076	2	1	1	2	9.0159e-63	215.08	144.98
VISIQPCPDVKYGKR	Unmodified	1758.95	P55072;C9JUP7;C9IZA5	VCP	Transitional endoplasmic reticulum ATPase	0.71788	0.71788	NaN	NaN	1			4	0.15183	76.588	31.381
ATKGGTVKAASGFNAMEDAQTLR	Acetyl (N-term)	2365.17	Q6P452;B4E1S2;P09525	ANXA4	Annexin;Annexin A4	0.71957	NaN	NaN	0.71957	2		1	3	1.2182e-12	100.94	56.56
LTKVHTECCHGDLLECADDR	Unmodified	2428.06	A0A0C4DGB6;CON__P02768-1;P02768;B7WNR0;C9JKR2;H0YA55;D6RHD5;P02768-2	ALB	Serum albumin	0.71964	0.69558	0.64208	0.72458	4	4	3	3;4	1.1763e-08	103.73	54.585	+
EVFDEVVQIFDKEG	Unmodified	1652.79	P30085-2;P30085	CMPK1	UMP-CMP kinase	0.72019	0.81992	0.7176	NaN	2	2	1	2;3	7.5147e-07	170.04	109.78
GVFVQEVTQNSPAAR	Unmodified	1601.82	Q09666;E9PKR9;E9PLK4;E9PQE3;E9PJZ0;E9PJC6;Q09666-2	AHNAK	Neuroblast differentiation-associated protein AHNAK	0.72053	0.72675	0.68114	0.67324	2	5	2	2;3	0.0059884	151.26	119.04
DSGEGDFLAEGGGVR	Unmodified	1464.65	P02671-2;P02671;A0A087WUA0	FGA	Fibrinogen alpha chain;Fibrinopeptide A;Fibrinogen alpha chain	0.72113	0.74178	0.63268	0.72113	1	1	1	2	0.0017606	140.78	81.965
GEVDDEEDEEELGEEER	Unmodified	2006.77	P39687	ANP32A	Acidic leucine-rich nuclear phosphoprotein 32 family member A	0.7216	0.7216	NaN	NaN	2	1	2	2	0	311.54	253.37
CTNLPTSKTAAAVAAQSGILDR	Unmodified	2244.15	Q9Y6N5;H3BNP9	SQRDL	Sulfide:quinone oxidoreductase, mitochondrial	0.72349	NaN	0.72349	NaN		1		3	0.00059362	88.036	44.666
ICTLSEKER	Unmodified	1134.57	A0A0C4DGB6;CON__P02768-1;P02768;B7WNR0;C9JKR2;H0YA55;D6RHD5;P02768-2;A0A087WWT3;P02768-3	ALB	Serum albumin	0.72487	0.69171	0.81881	0.71406	2	2	2	2;3	0.0074978	114.89	39.04	+
FKELTVSNNDINEAGVR	Unmodified	1904.96	P13489;E9PMJ3;E9PLZ3;E9PIM9	RNH1	Ribonuclease inhibitor	0.72493	0.53711	1.1719	0.72493	1	1	1	3	0.0045522	96.773	73.199
SDMPPLTLEGIQDR	Unmodified	1570.77	O14561	NDUFAB1	Acyl carrier protein, mitochondrial	0.72825	0.71813	0.7882	0.72822	3	4	3	2;3	7.0534e-27	191.53	77.82
ASVPELEGDLR	Unmodified	1184.6	Q09666	AHNAK	Neuroblast differentiation-associated protein AHNAK	0.72835	0.69682	0.76131	NaN	1	1		2	0.044727	85.533	65.23
VGVKPVGSDPDFQPELSGAGSR	Unmodified	2198.1	O43396;K7EKG2;K7EPB7	TXNL1	Thioredoxin-like protein 1	0.72963	NaN	0.65327	0.67185		2	1	3	0.0014949	77.668	70.046
TLDSTATQQELR	Unmodified	1361.68	P35749-4;P35749-3;P35749;P35749-2	MYH11	Myosin-11	0.73019	0.6091	0.85028	0.73019	1	1	1	2	0.0094564	125.97	43.997
SSSTEFVEKR	Unmodified	1168.57	D6RC15;O60749-2;O60749	SNX2	Sorting nexin-2	0.73194	0.73194	0.65876	0.79081	1	1	1	3	0.091478	81.771	59.05
TFLGGEDFDQALLR	Unmodified	1580.78	P38646	HSPA9	Stress-70 protein, mitochondrial	0.73241	0.73859	0.72628	0.65105	2	2	2	2;3	0.0063968	151.13	98.003
EVVKIQSLAR	Unmodified	1141.68	A0A0J9YXZ5;P46940;H0YLE8	IQGAP1	Ras GTPase-activating-like protein IQGAP1	0.733	0.733	NaN	NaN	1			3	0.022512	96.342	29.128
EAESDIFSIR	Unmodified	1165.56	Q07021;I3L3Q7;I3L3B0	C1QBP	Complement component 1 Q subcomponent-binding protein, mitochondrial	0.73365	0.83818	0.64215	NaN	1	1		2	0.011879	107.21	50.658
SDMPPLTLEGIQDR	Oxidation (M)	1586.76	O14561	NDUFAB1	Acyl carrier protein, mitochondrial	0.73385	0.96226	0.73385	0.63786	1	1	1	2	0.0049907	116.84	55.187
CGATWVVLGHSER	Unmodified	1470.7	P60174-1;P60174;U3KPS5;U3KQF3;U3KPZ0;P60174-4	TPI1	Triosephosphate isomerase	0.7339	NaN	0.7339	NaN		1		3	0.083139	79.466	65.737
LEEQLEEEEAAR	Unmodified	1444.67	P35749-4;P35749-3;P35749;P35749-2	MYH11	Myosin-11	0.73393	0.73393	NaN	NaN	1			2	0.085278	80.24	56.516
RFTDEEVDEMYR	Unmodified	1588.68	P24844;P24844-2	MYL9	Myosin regulatory light polypeptide 9	0.73492	0.73492	NaN	NaN	1			3	0.10485	62.162	43.585
ELAKDVTGAEALLER	Unmodified	1613.86	A0A0D9SF54;Q13813-3;Q13813;Q13813-2;A0A0D9SGF6	SPTAN1	Spectrin alpha chain, non-erythrocytic 1	0.7364	0.61586	0.88053	NaN	1	1		3	0.13712	68.576	26.102
GEYTLLAPVNNAFSDDTLSMDQR	Oxidation (M)	2572.18	B1ALD9;Q15063-4;Q15063-2;Q15063-3;Q15063-5;Q15063;CON__Q2KJC7;Q15063-7;Q15063-6	POSTN	Periostin	0.73669	0.73464	NaN	0.73874	1		1	3	0.0045008	71.527	63.438	+
TAAAPKAGPGVVR	Unmodified	1193.69	Q15691	MAPRE1	Microtubule-associated protein RP/EB family member 1	0.7373	NaN	0.71168	0.76384		1	1	3	0.060431	85.813	68.004
CFSEVPTSVFGEKLR	Unmodified	1754.87	H0Y653;H0YDU4;O00567	NOP56	Nucleolar protein 56	0.73769	0.73769	0.659	0.86452	1	1	1	3	0.052436	83.869	38.079
LHSYDLGIENR	Unmodified	1315.65	O75874;C9JJE5;C9JLU6;C9J4N6	IDH1	Isocitrate dehydrogenase [NADP] cytoplasmic	0.73796	0.72557	0.74077	0.73796	1	1	1	3	0.099996	65.842	13.451
IPKMLDAEDIVNTAR	Unmodified	1684.88	O43707	ACTN4	Alpha-actinin-4	0.73823	0.73823	NaN	NaN	1			3	0.18773	66.059	5.7138
GEEQNKEALQDVEDENQ	Unmodified	1973.85	P62258-2;P62258;I3L0W5	YWHAE	14-3-3 protein epsilon	0.73832	0.76365	0.76627	0.66936	6	3	3	2;3	1.3609e-104	201.38	179.71
EFPGIPSPLDAAVECHR	Unmodified	1893.9	P02790;Q9BS19	HPX	Hemopexin	0.73981	0.78088	0.69276	0.80712	1	2	1	3	0.0041679	107.63	84.201
AVNQEFLTTR	Unmodified	1177.61	P17661	DES	Desmin	0.74132	NaN	0.77027	0.71346		1	1	2	2.5408e-11	154.01	85.224
QFKSTLPDADR	Unmodified	1276.64	O43707;F5GXS2;O43707-3;O43707-2;H7C144	ACTN4	Alpha-actinin-4	0.74155	0.67987	NaN	0.80882	1		1	3	0.060953	85.924	52.033
KDGNGYISAAELR	Unmodified	1392.7	P0DP25;P0DP24;P0DP23;E7ETZ0;H0Y7A7;E7EMB3;Q96HY3;G3V361	CALM1;CALM2		0.74349	NaN	NaN	0.74349			1	3	0.14973	55.724	29.81
GVEGDLGETQSR	Unmodified	1246.58	Q09666	AHNAK	Neuroblast differentiation-associated protein AHNAK	0.74508	0.76772	0.70816	0.74508	1	1	1	2	2.3573e-05	145.25	92.758
TNDDDIVFEDFAR	Unmodified	1555.68	P49407-2;P49407	ARRB1	Beta-arrestin-1	0.74512	0.74512	NaN	NaN	1			2	0.06495	94.767	44.414
KGAVAEDGDELR	Unmodified	1258.62	G3V2D9;G3V5D9;A0A0C4DGK8;G3V3C7;G3V5Q1;G3V3M6;P27695	APEX1	DNA-(apurinic or apyrimidinic site) lyase;DNA-(apurinic or apyrimidinic site) lyase, mitochondrial	0.74647	NaN	NaN	0.74647			1	3	0.085574	80.17	16.85
CEVLTTLTPDTGR	Unmodified	1461.71	Q5VWC4;P55036-2;P55036;A6PVX3;A2A3N6	PSMD4;PIPSL	26S proteasome non-ATPase regulatory subunit 4;Putative PIP5K1A and PSMD4-like protein	0.74716	0.73508	0.74716	1.6448	1	1	2	2	0.012159	133.89	62.877
DDIVFEDFAR	Unmodified	1225.56	P49407-2;P49407;Q68DZ5;P32121-5;P32121-2;P32121;P32121-3;P32121-4	ARRB1;DKFZp686L0365;ARRB2	Beta-arrestin-1;Beta-arrestin-2	0.74785	0.74785	NaN	NaN	1			2	0.16378	73.985	52.135
GQVNYEEFVQMMTAK	Unmodified	1773.81	P0DP25;P0DP24;P0DP23;E7ETZ0;H0Y7A7;E7EMB3;M0QZ52;Q96HY3	CALM1;CALM2;CALM3		0.74921	0.77864	NaN	0.72089	1		1	2	0.0016206	146.79	102.89
TFHADICTLSEKER	Unmodified	1705.81	A0A0C4DGB6;CON__P02768-1;P02768;B7WNR0;C9JKR2;H0YA55;D6RHD5;P02768-2;A0A087WWT3;P02768-3	ALB	Serum albumin	0.74974	0.69087	0.85118	0.7081	2	4	4	3;4	0.0045835	146.79	146.79	+
ELKEVFEDAAEIR	Unmodified	1547.78	P19338;H7BY16	NCL	Nucleolin	0.75099	0.75099	NaN	NaN	2			2;3	0.0028375	135.81	68.563
KDGDGTITTKELGTVMR	Unmodified	1820.93	P0DP25;P0DP24;P0DP23;E7ETZ0;H0Y7A7;E7EMB3;M0QZ52;F8WBR5;G3V479	CALM1;CALM2;CALM3		0.75132	0.69257	0.76286	0.73995	2	1	1	3;4	0.012624	86.214	59.325
LEKDIISDTSGDFR	Unmodified	1594.78	H0YMD0;H0YMU9;H0YM50;H0YN42;P07355;P07355-2;H0YN28;H0YL33;H0YNP5;H0YNA0;H0YKS4;A6NMY6;H0YN52	ANXA2;ANXA2P2	Annexin;Annexin A2;Putative annexin A2-like protein	0.75254	0.66593	0.82703	0.82687	5	2	2	2;3	5.9818e-07	170.74	112.94
YLALNEDLR	Unmodified	1105.58	Q8MH48;Q5RJ85;A0A0G2JPQ3;P17693	HLA-G	HLA class I histocompatibility antigen, alpha chain G	0.75259	0.75259	0.74926	0.88308	1	1	1	2	0.0211	98.629	0
DDLVTVKTPAFAESVTEGDVR	Unmodified	2248.12	H0YJF9;G3V5M3;G3V3F0;Q86SW4;P36957	DLST	Dihydrolipoyllysine-residue succinyltransferase component of 2-oxoglutarate dehydrogenase complex, mitochondrial	0.75328	0.6985	0.59425	1.0062	1	1	2	3	6.3473e-09	103.45	63.365
DYTIPDEYR	Unmodified	1170.52	Q68E03;B3KM87;D6REM6;A0A0R4J2E8;A8MXP9;P43243-2;P43243	DKFZp686L22104;MATR3	Matrin-3	0.75541	0.75541	0.65679	0.90139	1	1	1	2	0.031553	96.711	33.225
VGAHAGEYGAEALER	Unmodified	1528.73	P69905	HBA1	Hemoglobin subunit alpha	0.75571	0.78852	0.72426	NaN	1	1		3	0.0091561	98.654	33.089
KALAAAGYDVEKNNSR	Unmodified	1705.87	P16403;P10412;P16402;P22492;Q02539	HIST1H1C;HIST1H1E;HIST1H1D;HIST1H1T;HIST1H1A	Histone H1.2;Histone H1.4;Histone H1.3;Histone H1t;Histone H1.1	0.75577	0.70071	0.74386	0.83405	4	2	4	2;3;4	1.7906e-14	162.79	98.564
GKNCEDMDECSIR	Unmodified	1612.63	P35555	FBN1	Fibrillin-1	0.75578	0.75578	NaN	NaN	1			3	0.056348	96.866	53.053
VIFADVAQPDQTR	Unmodified	1458.75	M0R0P1;M0R299;M0QXL5;M0R2Q4;P22087	FBL	rRNA 2'-O-methyltransferase fibrillarin	0.75627	0.75627	0.66386	1.0565	1	1	1	2	0.007997	107.83	65.495
GPSLLVVEQVR	Unmodified	1195.69	Q8N1G4	LRRC47	Leucine-rich repeat-containing protein 47	0.75711	0.83201	NaN	0.68896	1		1	2	0.00042608	136.63	54.348
AMATKGGTVKAASGFNAMEDAQTLR	Acetyl (N-term)	2567.25	Q6P452;B4E1S2	ANXA4	Annexin	0.75797	2.0925	0.73831	2.7701	3	2	3	3;4	3.2008e-39	71.905	38.598
QAIAEALAAPSR	Unmodified	1196.65	P48637-2;P48637	GSS	Glutathione synthetase	0.75981	0.53396	0.75981	0.82077	1	1	1	2	0.01748	112.94	44.091
RLQSEPESIR	Unmodified	1213.64	F8WF69;P09496-2;P09496-4;P09496-3;P09496	CLTA	Clathrin light chain A	0.7605	NaN	NaN	0.7605			1	3	0.016558	80.916	31.727
SVDAAFICPGSSR	Unmodified	1365.63	P02790	HPX	Hemopexin	0.76084	NaN	0.78169	0.74055		1	1	2	0.0083841	124.42	82.996
VTKLKSDTAAAAVR	Unmodified	1429.83	P22314-2;P22314	UBA1	Ubiquitin-like modifier-activating enzyme 1	0.76121	0.74483	0.77795	NaN	1	1		4	0.13572	78.705	27.428
GFWEALGGKAAYR	Unmodified	1424.72	A0A0A0MS51;A0A0A0MT01;P06396-2;P06396-4;P06396-3;P06396	GSN	Gelsolin	0.76148	0.79004	NaN	0.73395	1		1	3	0.0092188	124.67	58.827	+
SGCKVQISPDSGGLPER	Unmodified	1785.87	A0A087WTP3;Q92945;M0QXW7;M0QYH3	KHSRP	Far upstream element-binding protein 2	0.76182	0.76504	0.76182	0.75223	1	1	1	3	0.0051274	94.325	78.803
GSCMVEESGTLESQLEATKR	Unmodified	2211.01	A0A0D9SF54;Q13813-3;Q13813;Q13813-2	SPTAN1	Spectrin alpha chain, non-erythrocytic 1	0.76247	0.664	0.76247	1.0478	2	1	1	3	7.3291e-17	172.93	151.69
TIVNVQQIDDGWMYGTVER	Unmodified	2223.06	Q14847;Q14847-3	LASP1	LIM and SH3 domain protein 1	0.76291	0.76291	NaN	NaN	1			3	0.068152	63.639	54.88
LATKAIEEYMR	Oxidation (M);Acetyl (N-term)	1381.69	A0A1B0GW70;A0A0A0MQZ2;B7ZCA0;Q96PV0-3;Q96PV0-2;Q96PV0-4;Q96PV0	SYNGAP1	Ras/Rap GTPase-activating protein SynGAP	0.76321	NaN	0.7562	0.77029		1	1	2	0.028004	61.679	61.679
YELTQPPSVSVSPGQTAR	Unmodified	1915.96	A0A075B6K4;P01717	IGLV3-10	Ig lambda chain V-IV region Hil	0.76334	NaN	0.89404	0.65175		1	1	2	0.00089669	115.78	92.863
TPTLVEVSR	Unmodified	1000.56	A0A0C4DGB6;CON__P02768-1;P02768;B7WNR0;C9JKR2;H0YA55;D6RHD5;P02768-2;A0A087WWT3;P02768-3;CON__P02769	ALB	Serum albumin	0.76384	0.76384	0.83227	0.72682	1	1	1	2	0.00013136	138.4	75.849	+
EEELGEEER	Unmodified	1118.47	P39687;O43423	ANP32A;ANP32C	Acidic leucine-rich nuclear phosphoprotein 32 family member A;Acidic leucine-rich nuclear phosphoprotein 32 family member C	0.76388	0.76388	NaN	NaN	1			2	0.026517	97.635	15.356
GENAGSLTHIEAQNKIR	Unmodified	1836.94	D6RAN1;H0Y8W6;D6RF83;H7BYK4;D6RH06;Q9NR12-3;Q9NR12-5;Q9NR12-6;Q9NR12-4;Q9NR12-2;Q9NR12	PDLIM7	PDZ and LIM domain protein 7	0.76401	0.76401	NaN	NaN	1			4	0.032266	99.927	60.894
EVLYVFPSDFCR	Unmodified	1530.72	A0A1W2PRF6;A0A1W2PPX5;A0A1W2PQR6;A0A1W2PQB7;A0A1W2PS43;A0A1W2PRS1;Q14108-2;Q14108	SCARB2	Lysosome membrane protein 2	0.76682	0.81197	0.78743	0.69686	1	1	2	2	1.8443e-10	134.68	116.34
VASLSSQLQDTQELLQEETR	Unmodified	2274.13	P35749-4;P35749-3;P35749;P35749-2	MYH11	Myosin-11	0.76682	NaN	0.63839	0.78083	1	2	2	3	2.1205e-23	179.1	126.6
ELQATEDAKLR	Unmodified	1272.67	P35749-4;P35749-3;P35749;P35749-2;P35580;P35580-5;P35580-2;P35580-3;P35580-4;P35579;P35579-2	MYH11;MYH10;MYH9	Myosin-11;Myosin-10;Myosin-9	0.76926	1.0228	0.70968	0.64011	2	1	1	2;3	1.6916e-05	143.5	85.717
WHLGAMHESR	Unmodified	1222.57	Q96DN2;A0A087WVD8	VWCE	von Willebrand factor C and EGF domain-containing protein	0.77033	0.83146	0.75326	0.77033	1	1	1	2	0.17202	73.248	19.28
DDEETAPPVIAPR	Unmodified	1408.68	Q13177	PAK2	Serine/threonine-protein kinase PAK 2;PAK-2p27;PAK-2p34	0.77076	NaN	NaN	0.77076			1	2	0.072231	93.096	38.836
AEVSKSDIGEVILVGGMTR	Unmodified	1960.03	P38646;H0YBG6	HSPA9	Stress-70 protein, mitochondrial	0.77282	0.68676	0.77282	0.77561	1	1	1	3	9.9747e-05	125.59	76.329
MEKTLETVPLER	Acetyl (N-term)	1486.77	P22626;A0A087WUI2	HNRNPA2B1	Heterogeneous nuclear ribonucleoproteins A2/B1	0.77409	0.77702	0.77117	0.20716	1	1	2	2	4.0918e-54	200.93	100.91
VVYNASNNELVR	Unmodified	1376.7	P62241;Q5JR95	RPS8	40S ribosomal protein S8	0.77616	0.84784	0.71053	NaN	1	1		2	9.781e-05	152.34	89.518
AKGISQEQMNEFR	Unmodified	1536.74	P12814-2;P12814;P12814-3;P12814-4;H9KV75;H0YJ11;H0YJW3;H7C5W8	ACTN1	Alpha-actinin-1	0.77642	NaN	0.85313	0.7066		1	1	3	0.048559	88.075	47.35
SISAASTSDVQDR	Unmodified	1335.63	B5MBZ0;Q9HC35-2;Q9HC35	EML4	Echinoderm microtubule-associated protein-like 4	0.78032	0.78032	0.6069	0.15573	1	1	2	2	7.14e-22	175.49	175.49
VITIETADHAR	Unmodified	1224.65	Q14764	MVP	Major vault protein	0.78094	0.76291	0.7837	0.72684	1	1	3	3	0.00054131	120.06	47.133
SGEENPASKPTPVQDVQGDGR	Acetyl (N-term)	2209.02	M0QXS6;M0R323;M0QZT2;M0R389;Q15102	PAFAH1B3	Platelet-activating factor acetylhydrolase IB subunit gamma	0.78137	0.78137	0.75634	0.90943	2	4	1	2;3	8.5076e-10	110.44	78.184
AYDNFDNISLAQR	Unmodified	1525.72	K7EJJ5;J3KS13;A0A087WVQ6;Q00610-2;Q00610	CLTC	Clathrin heavy chain;Clathrin heavy chain 1	0.78248	0.78248	0.7425	0.79128	1	1	1	2	0.026336	92.866	57.325
MDNSGKEAEAMALLAEAER	Acetyl (N-term)	2076.95	M0QZM9;M0QZN5;M0R031;M0R0Y2;M0R2M1;P54920	NAPA	Alpha-soluble NSF attachment protein	0.78556	NaN	NaN	0.78556			1	2	1	NaN	NaN
AKGISQEQMQEFR	Unmodified	1550.75	O43707;F5GXS2;O43707-3;O43707-2;H7C144	ACTN4	Alpha-actinin-4	0.78631	0.53812	0.83614	0.80067	2	2	3	2;3	0.0018205	156.52	117.35
GQPQVVPVAADQR	Unmodified	1363.72	A0A140T923;A0A140T956;A0A140T8Z8;A0A140T9C0;A0A140T902;A0A140T8Y3;A0A140TA52;A0A140TA41;A0A140TA33;P22105;P22105-3;P22105-4	TNXB	Tenascin-X	0.7878	0.7878	NaN	NaN	1			2	0.047834	98.943	53.263
TDCPCPEPELCR	Unmodified	1532.61	F6X5H7;Q01459	CTBS	Di-N-acetylchitobiase	0.78799	0.74117	0.83776	NaN	1	1		2	0.012227	114.86	44.307
GTLIASCSNDQTVR	Unmodified	1520.73	I3L3N5;P43034	PAFAH1B1	Platelet-activating factor acetylhydrolase IB subunit alpha	0.78887	0.7728	0.80527	NaN	1	1		2	0.0071559	104.87	64.139
CCTESLVNR	Unmodified	1137.49	A0A0C4DGB6;CON__P02768-1;P02768;B7WNR0;C9JKR2;H0YA55;D6RHD5;P02768-2;A0A087WWT3;P02768-3;CON__P02769	ALB	Serum albumin	0.78947	0.80042	0.7859	0.78947	1	1	1	2	3.576e-08	147.34	122.82	+
ADLEEQLSDEEKVR	Acetyl (N-term)	1701.81	C9JUG7;F8W9N7;P47755-2;P47755	CAPZA2	F-actin-capping protein subunit alpha-2	0.79283	0.79586	0.75324	0.75191	1	1	1	2	6.9493e-63	171.67	109.89
SLQKNQDLEFER	Unmodified	1505.75	P21399	ACO1	Cytoplasmic aconitate hydratase	0.79301	0.79301	NaN	NaN	1			3	0.009618	104.59	45.438
NEATGGKYVPR	Unmodified	1190.6	Q5JP53;P07437;P68371	TUBB;TUBB4B	Tubulin beta chain;Tubulin beta-4B chain	0.79356	0.79356	0.65845	0.79582	1	1	1	3	0.032061	93.667	45.227
CGPESSKKYAEAVTR	Unmodified	1681.81	P00558-2;P00558	PGK1	Phosphoglycerate kinase 1	0.7936	0.93186	0.7936	0.78194	4	3	3	2;3	0.010504	126.83	93.774
ACFDEEATGTIQEDYLR	Unmodified	2016.87	J3QRS3;P19105;O14950	MYL12A;MYL12B	Myosin regulatory light chain 12A;Myosin regulatory light chain 12B	0.79467	0.79467	NaN	NaN	1	1	1	2;3	3.2778e-05	142.83	107.09
SLSMLSTR	Oxidation (M);Acetyl (N-term)	951.47	H7C5K9;C9JYI3;C9JTY4;Q9NUT2-5;Q9NUT2-4;Q9NUT2-3;Q9NUT2-2;Q9NUT2	ABCB8	ATP-binding cassette sub-family B member 8, mitochondrial	0.79527	NaN	0.77155	0.81973		1	1	2	0.042693	95.909	37.094
EHGIDPTGTYHGDSDLQLER	Unmodified	2239.01	P68371;P04350;M0R0X0;M0QY85;M0QY37;M0QX14;M0QZL7;M0R278;M0R2D3;M0QYM7	TUBB4B;TUBB4A	Tubulin beta-4B chain;Tubulin beta-4A chain	0.79724	0.75667	0.79724	0.87333	1	1	1	4	0.074979	58.693	36.852
SGEGDFLAEGGGVR	Unmodified	1349.62	P02671-2;P02671;A0A087WUA0	FGA	Fibrinogen alpha chain;Fibrinopeptide A;Fibrinogen alpha chain	0.79903	0.79903	0.7879	0.84687	2	1	1	2	8.7449e-19	186.74	131.37
GKGQEVETSVTYYR	Unmodified	1615.78	D6RFH4;H3BUX2;J3KNF8;O43169	CYB5B	Cytochrome b5 type B	0.80053	NaN	0.79935	0.96578		2	1	3	0.0206	91.845	76.087
QLSEPSEVR	Unmodified	1043.52	Q15149-9;Q15149-7;Q15149-8;Q15149-5;Q15149-4;Q15149-6;Q15149-3;Q15149-2;Q15149	PLEC	Plectin	0.80098	0.87418	0.73391	NaN	1	1		2	0.13566	81.296	28.58
EIPFSPYR	Unmodified	1007.51	P21333-2;P21333;Q60FE5;Q5HY54;A0A087WWY3	FLNA	Filamin-A	0.80331	0.79468	0.81203	NaN	1	1		2	0.058198	98.997	33.959
SPFVVPVASPSGDAR	Unmodified	1484.76	P21333-2;P21333;Q60FE5;Q5HY54;A0A087WWY3;H0Y5C6	FLNA	Filamin-A	0.8034	3.4223	0.8034	0.78073	2	2	2	2	4.2943e-78	210.35	127.6
ASVKEWTITY	Unmodified	1196.61	O75083-3;O75083	WDR1	WD repeat-containing protein 1	0.80423	0.80423	NaN	NaN	1			2	0.014791	100.02	68.257
EQAEAEVASLNR	Unmodified	1315.64	D6R904;A0A087WWU8;Q5HYB6;P06753-4;P06753-3;P06753-6;P06753-5;P06753-2	TPM3;DKFZp686J1372		0.80464	0.80464	NaN	NaN	1			2	0.13213	85.813	5.1243
SLGFDEPTEQPVR	Unmodified	1473.71	J3KT51;Q9UK76;Q9UK76-2	HN1	Hematological and neurological expressed 1 protein;Hematological and neurological expressed 1 protein, N-terminally processed	0.80504	0.85623	0.75692	NaN	1	1		2	0.0089608	100.88	37.662
SETTTSLVLER	Unmodified	1234.64	C9J8J0;C9K0U8;A0A0G2JLD8;E7EUY5;Q04837	SSBP1	Single-stranded DNA-binding protein, mitochondrial	0.8054	0.85661	0.79331	0.8054	1	1	1	2	0.02271	97.565	46.506
YGVLKTDEGIAYR	Unmodified	1483.77	P32119	PRDX2	Peroxiredoxin-2	0.80544	0.80544	0.83625	0.73948	1	1	1	3	0.019804	95.273	50.974
FREPTEEER	Unmodified	1191.55	Q15056-2;Q15056	EIF4H	Eukaryotic translation initiation factor 4H	0.80773	0.80482	0.79624	0.81065	1	2	2	2;3	3.6732e-47	205.83	163.64
AASIFGGAKPVDTAAR	Unmodified	1530.82	E7EX17;P23588-2;P23588;F8VX11	EIF4B	Eukaryotic translation initiation factor 4B	0.80778	1.1812	0.5524	0.4953	1	1	1	3	0.0084347	98.654	78.529
GVIKVFNDMKVR	Unmodified	1404.79	E9PS23;E9PP50;E9PK25;P23528	CFL1	Cofilin-1	0.80791	0.92354	0.76605	NaN	2	2		3	0.024319	95.477	40.125
MELLGEYVGQEGKPQKLR	Acetyl (N-term)	2116.1	Q9BXV9	C14orf142	Uncharacterized protein C14orf142	0.80873	0.80873	0.75388	0.77776	1	2	2	3	0.012308	58.885	24.137
SEFTSSLSTKDSLR	Unmodified	1556.77	H0YEN2;E9PQP7;H7BXH2;E9PKF6;Q5H9R7-3;Q5H9R7-4;Q5H9R7-6;Q5H9R7-2;Q5H9R7;Q5H9R7-5	PPP6R3	Serine/threonine-protein phosphatase 6 regulatory subunit 3	0.80876	0.6732	0.97161	NaN	1	1		3	0.011795	96.866	53.322
TMSDQALEALSASLGTR	Unmodified	1749.86	H0Y7F0;H0Y9H6;E9PDE4;E7ES10;E9PCH5;E7EVY3;B7Z574;A0A0C4DGB5;P20810-3;P20810-4;P20810-8;P20810-2;P20810;P20810-9;P20810-5;P20810-10;P20810-7;P20810-6;F8W7E0	CAST	Calpastatin	0.80916	0.80916	NaN	NaN	1			3	0.006133	91.401	60.252
GLAVTPTPVPVVGSQMTR	Unmodified	1808.98	P26368-2;P26368;K7ELP8	U2AF2	Splicing factor U2AF 65 kDa subunit	0.80931	0.83274	NaN	0.80427	1		2	2	0.0040388	86.114	22.42
GTFYEFGEDIPEAPER	Unmodified	1855.83	O43776	NARS	Asparagine--tRNA ligase, cytoplasmic	0.8099	0.89028	0.82549	0.74592	2	4	2	2;3	7.4984e-170	253.97	229.9
TIYEDEDVKEAIR	Unmodified	1579.77	B7Z2R2;P14927;P14927-2;E5RHG9	UQCRB	Cytochrome b-c1 complex subunit 7	0.81146	0.81146	0.55086	0.93525	1	1	1	3	0.016138	128.57	78.631
TTTLIEPAPR	Unmodified	1097.61	P46109	CRKL	Crk-like protein	0.81685	NaN	0.81685	NaN		1		2	0.014299	101.64	82.166
LPDSVDWR	Unmodified	986.482	P25774	CTSS	Cathepsin S	0.81859	0.78371	0.80381	0.90972	1	1	2	2	0.045369	104.37	37.331
GADSTGVVAKLSPANQR	Unmodified	1669.87	M0R0K9;Q13263-2;Q13263	TRIM28	Transcription intermediary factor 1-beta	0.81897	0.722	0.92897	NaN	1	1		3	0.0052662	110.38	83.414
GTKTVEYAPCR	Unmodified	1280.62	P06756-3;P06756-2;P06756	ITGAV	Integrin alpha-V;Integrin alpha-V heavy chain;Integrin alpha-V light chain	0.821	0.74897	0.89995	NaN	1	1		3	0.04978	88.596	31.064
RFASEASGYQDNIAR	Unmodified	1683.8	P17661	DES	Desmin	0.82294	0.82294	0.73558	0.8341	1	1	1	3	0.0093267	98.421	70.07
NLPLPPPPPPR	Unmodified	1193.69	P61978-3;P61978;P61978-2;Q5T6W2	HNRNPK	Heterogeneous nuclear ribonucleoprotein K	0.82468	NaN	NaN	0.82468	1		3	2	0.072856	83.647	68.978
GFTASPNQDECLDNR	Unmodified	1722.73	P35555	FBN1	Fibrillin-1	0.82509	0.90687	0.83166	0.69365	2	3	1	2	0.0016438	134.98	105.67
ANNDAVLKR	Acetyl (N-term)	1041.56	Q12904;Q12904-2;D6R937	AIMP1	Aminoacyl tRNA synthase complex-interacting multifunctional protein 1;Endothelial monocyte-activating polypeptide 2	0.82536	NaN	NaN	0.82536			1	2	0.065903	98.523	29.325
KVEQAVETEPEPELR	Unmodified	1752.89	E9PEV4;E7ERP7;H0Y7L5;P02649	APOE	Apolipoprotein E	0.82593	0.83414	0.71791	0.70452	1	1	1	3	0.0087605	99.796	52.832
SGSVAPANSALGQTQPSDQDTLVQR	Unmodified	2526.23	H0Y8Y3;A0A0A0MSP3;Q96HC4-7;Q96HC4-4;Q96HC4;Q96HC4-6	PDLIM5	PDZ and LIM domain protein 5	0.82626	0.82626	NaN	NaN	1			3	9.5288e-06	90.084	56.679
AAFICPGSSR	Unmodified	1064.51	P02790	HPX	Hemopexin	0.82636	0.774	NaN	0.88227	1		1	2	0.14822	75.378	21.603
QGTYEDYVEGLR	Unmodified	1428.65	H0YI43;F8VZU9;G3V1Y7;F8VPF3;F8W1R7;J3KND3;G8JLA2;G3V1V0;F8W180;B7Z6Z4;P60660-2;P60660	MYL6	Myosin light polypeptide 6	0.82704	0.83991	0.81438	NaN	1	1		2	0.015589	113.63	60.302
LLECADDR	Unmodified	990.444	A0A0C4DGB6;CON__P02768-1;P02768;B7WNR0;C9JKR2;H0YA55;D6RHD5;P02768-2;CON__P02769	ALB	Serum albumin	0.82718	0.81017	0.77278	0.84454	2	2	1	2	1.6394e-21	176.66	85.676	+
SSMAEVDAAMAAR	Unmodified	1308.58	P22626;A0A087WUI2;P22626-2	HNRNPA2B1	Heterogeneous nuclear ribonucleoproteins A2/B1	0.8273	0.8273	NaN	NaN	1			2	0.12873	84.658	41.023
TVATQLSEAVDATR	Unmodified	1460.75	O60664-4;O60664-3;O60664;K7ERZ3;K7EL96	PLIN3	Perilipin-3	0.82748	0.82748	NaN	NaN	1	2	1	2	0.007206	107.11	46.423
SKFEDYLNAESR	Unmodified	1457.68	Q16181-2;Q16181;A0A0U1RRH9;A0A0U1RRE1;G3V1Q4;E7ES33;E7EPK1	2019-09-07	Septin-7	0.82862	0.82862	NaN	NaN	1			3	0.10744	76.073	55.41
GGKLDVGNAEVKLEEENR	Unmodified	1955.99	C9JSP1;C9JQ75;C9J0M4;P51572;P51572-2	BCAP31	B-cell receptor-associated protein 31	0.82932	0.96834	0.82932	0.97737	3	1	1	3;4	0.0025621	113.67	65.323
GGNQEVEIAR	Unmodified	1071.53	H7C330;P13861-2;P13861	PRKAR2A	cAMP-dependent protein kinase type II-alpha regulatory subunit	0.83016	0.83016	0.82148	0.88692	1	1	1	2	0.0046293	112.11	34.79
LFNCEVTNLNDYR	Unmodified	1656.76	P39687;H0YN26;Q92688-2;Q92688	ANP32A;ANP32B	Acidic leucine-rich nuclear phosphoprotein 32 family member A;Acidic leucine-rich nuclear phosphoprotein 32 family member B	0.83017	0.83017	NaN	NaN	1			2	0.12839	84.687	28.328
ATTKLNVGAPDVTLR	Unmodified	1554.87	Q09666	AHNAK	Neuroblast differentiation-associated protein AHNAK	0.83024	NaN	0.83024	NaN		1		3	0.053781	87.148	40.184
TLETTCHVLDPTPVAR	Unmodified	1808.91	C9JV77;P02765	AHSG	Alpha-2-HS-glycoprotein;Alpha-2-HS-glycoprotein chain A;Alpha-2-HS-glycoprotein chain B	0.83158	0.83158	NaN	NaN	1			3	0.015295	89.624	59.643
KIIGAVDQIQLTQAQLEER	Unmodified	2152.19	Q6NZI2-2;Q6NZI2	PTRF	Polymerase I and transcript release factor	0.83169	0.70446	0.73479	0.77264	1	2	1	3	9.7014e-07	110.26	64.139
ALDANDELTPLGR	Unmodified	1383.7	Q08211	DHX9	ATP-dependent RNA helicase A	0.83187	0.88025	NaN	0.78615	1		1	2	0.012989	112.13	52.88
EETAQLPSAPQGSR	Unmodified	1469.71	Q9BRP8-2;Q9BRP8	WIBG	Partner of Y14 and mago	0.83201	0.98817	NaN	0.70052	1		1	2	0.010767	97.452	55.116
SSNECFKCGR	Acetyl (N-term)	1285.52	D6RAT4;P62633-7;P62633-3;P62633-2;P62633-8;P62633-5;P62633;P62633-4;P62633-6	CNBP	Cellular nucleic acid-binding protein	0.83248	0.83481	0.8052	0.83248	1	1	1	2	9.2603e-13	100.25	39.084
KAFVDFLSDEIKEER	Unmodified	1824.93	Q07021	C1QBP	Complement component 1 Q subcomponent-binding protein, mitochondrial	0.83576	0.86893	NaN	0.73831	2	1	1	3;4	5.0344e-07	168.45	124
AGQISGLNVLR	Unmodified	1126.65	P38646	HSPA9	Stress-70 protein, mitochondrial	0.83586	0.83586	NaN	NaN	1			2	0.02567	96.331	70.594
SETGAGKHVPR	Unmodified	1137.59	Q71U36-2;Q71U36;P68363;F5H5D3;Q9BQE3;F8VVB9;F8VQQ4;P68363-2;Q6PEY2;Q13748;Q13748-2;A0A1W2PQM2;F8VRK0;F8VX09;F8VWV9;F8VRZ4;F8VS66;F8W0F6	TUBA1A;TUBA1B;TUBA1C;TUBA3E;TUBA3C	Tubulin alpha-1A chain;Tubulin alpha-1B chain;Tubulin alpha-1C chain;Tubulin alpha-3E chain;Tubulin alpha-3C/D chain	0.83934	0.83934	0.84314	0.79789	1	1	1	3	0.043288	90.149	49.797
GWDSEPFTLVER	Unmodified	1434.68	J3KRD5;J3QR27;J3QLU1;A0A087WVS2;J3QKQ0;J3QRD0;J3KSV5;A0A087WYZ1;J3QRH4;J3QKT2;Q96KP4	CNDP2	Cytosolic non-specific dipeptidase	0.84064	0.84064	0.8165	0.88015	1	1	1	2	1.7206e-05	144.77	129.63
KTIGGGDDSFNTFFSETGAGKHVPR	Unmodified	2624.26	Q71U36-2;Q71U36;P68363;F5H5D3;Q9BQE3;F8VVB9;F8VQQ4;P68363-2;Q6PEY2;Q13748;Q13748-2;A0A1W2PQM2;F8VRK0;F8VX09;F8VWV9;F8VRZ4;F8VS66;F8W0F6	TUBA1A;TUBA1B;TUBA1C;TUBA3E;TUBA3C	Tubulin alpha-1A chain;Tubulin alpha-1B chain;Tubulin alpha-1C chain;Tubulin alpha-3E chain;Tubulin alpha-3C/D chain	0.84129	1.0078	1.0547	0.81715	3	1	3	4;5	6.9089e-14	97.253	58.799
TFEPAEFIIDTR	Unmodified	1437.71	P21333-2;P21333;Q60FE5;Q5HY54;H0Y5C6	FLNA	Filamin-A	0.84134	0.73282	0.84134	1.1186	1	1	1	2	0.059445	100.82	26.647
MQPASAKWYDR	Acetyl (N-term)	1393.64	B4DDC6;Q15185-2;Q15185-3;Q15185-4;Q15185	PTGES3	Prostaglandin E synthase 3	0.84156	0.92936	0.76205	0.76067	1	1	1	2	0.00071273	98.048	56.6
KVPKTAENFR	Unmodified	1188.66	F8WE65;C9J5S7;P62937	PPIA	Peptidyl-prolyl cis-trans isomerase;Peptidyl-prolyl cis-trans isomerase A;Peptidyl-prolyl cis-trans isomerase A, N-terminally processed	0.8425	NaN	0.8477	0.81862		2	1	2;3	0.082798	80.455	34.482
GPAQAQPSPTTER	Unmodified	1338.65	S4R418;F5H0W4;A0A0A0MT10;A0A087X188;Q9UBW5-2;Q9UBW5	BIN2	Bridging integrator 2	0.84279	0.84279	NaN	NaN	1			2	0.02923	104.22	58.854
GVKESTESSNTTIEDEDVKAR	Unmodified	2294.09	H0Y9J2;D6R938;Q13557-8;Q13557-12;Q13557	CAMK2D	Calcium/calmodulin-dependent protein kinase type II subunit delta	0.84325	0.96806	0.73453	NaN	1	1		4	8.966e-08	127.53	78.985
LYQKELATLQR	Unmodified	1361.77	A0A0J9YXZ5;P46940	IQGAP1	Ras GTPase-activating-like protein IQGAP1	0.8437	NaN	NaN	0.8437			1	3	0.16358	72.531	12.467
TDEDSLIEIICSR	Unmodified	1549.73	H0YMD0;H0YMU9;H0YM50;H0YN42;P07355;P07355-2;H0YN28;H0YL33;H0YNP5;H0YNA0;H0YKS4;A6NMY6;H0YN52;H0YMM1;H0YLE2	ANXA2;ANXA2P2	Annexin;Annexin A2;Putative annexin A2-like protein	0.84378	0.77345	0.84378	0.93262	2	2	2	2;3	0.00099185	165.63	94.018
GSQETDEEFDAR	Unmodified	1382.56	H3BRI0;H3BNX8;P20674	COX5A	Cytochrome c oxidase subunit 5A, mitochondrial	0.84447	0.84447	NaN	NaN	1			2	0.16318	83.862	52.44
TILAEGLHFR	Unmodified	1155.64	F5H2D2;F5H0C5;F5H3X6;F5GY37;J3KPX7;Q99623-2;Q99623	PHB2	Prohibitin-2	0.84534	0.84534	NaN	NaN	2			3	1.5774e-10	133.99	81.504
QSILCTGESGAGKTEN	Unmodified	1650.75	E7ERA5	MYH10		0.84703	0.98043	0.81441	0.84703	3	1	2	2	1.2794e-31	194.59	68.858
DGTGQKQIWR	Unmodified	1187.6	A0A0A0MS51;A0A0A0MT01;P06396-2;P06396-4;P06396-3;P06396	GSN	Gelsolin	0.8472	0.87981	0.75469	0.8472	1	1	1	3	0.033915	92.051	49.453	+
SLYVEEVDVGEIAPR	Unmodified	1674.85	Q12904;Q12904-2	AIMP1	Aminoacyl tRNA synthase complex-interacting multifunctional protein 1;Endothelial monocyte-activating polypeptide 2	0.84739	0.84739	NaN	NaN	2	1	1	2	0.0095963	103.46	51.183
NLEKETEGLR	Unmodified	1187.61	P02647;F8W696	APOA1	Apolipoprotein A-I;Proapolipoprotein A-I;Truncated apolipoprotein A-I	0.84783	NaN	NaN	0.84783			1	2	0.16921	74.92	0
EDSLIEIICSR	Unmodified	1333.65	H0YMD0;H0YMU9;H0YM50;H0YN42;P07355;P07355-2;H0YN28;H0YL33;H0YNP5;H0YNA0;H0YKS4;A6NMY6;H0YN52;H0YMM1;H0YLE2	ANXA2;ANXA2P2	Annexin;Annexin A2;Putative annexin A2-like protein	0.85258	0.86012	0.8317	0.93053	3	3	2	2;3	4.0922e-25	218.47	154.2
SLLQDGEFSMDLR	Oxidation (M)	1525.71	P07737;K7EJ44	PFN1	Profilin-1	0.85555	0.89217	0.80921	0.88361	1	3	1	2	0.0085166	103.21	40.138
AATFFGEVVKAPCR	Acetyl (N-term)	1593.8	F8WBH7;O95456-2;O95456	PSMG1	Proteasome assembly chaperone 1	0.85602	NaN	0.81724	0.89664	2	1	1	2	0.00050903	81.017	16.197
GSEIPLPPILLGR	Unmodified	1360.81	J3KRD5;J3QR27;J3QLU1;A0A087WVS2;J3QKQ0;J3QRD0;J3KSV5;A0A087WYZ1;J3QRH4;J3QKT2;Q96KP4;J3QQN6;J3QL02	CNDP2	Cytosolic non-specific dipeptidase	0.85892	0.76274	0.85892	0.91091	1	1	1	2	0.077437	81.338	46.114
ELIPEYLNFIR	Unmodified	1405.76	P08238;P07900;P07900-2;Q58FG1	HSP90AB1;HSP90AA1;HSP90AA4P	Heat shock protein HSP 90-beta;Heat shock protein HSP 90-alpha;Putative heat shock protein HSP 90-alpha A4	0.85909	0.85909	NaN	NaN	1			2	0.18748	72.928	33.624
YFMPCPGR	Unmodified	1026.44	P02790;Q9BS19	HPX	Hemopexin	0.85996	0.99944	0.82789	0.85996	1	1	1	2	0.048637	109.7	63.04
AEAVEPDFSSIER	Unmodified	1448.68	A0A0A0MQU1;Q27J81-2;Q27J81	INF2	Inverted formin-2	0.86015	0.86015	NaN	NaN	2			2	0.038342	109.42	36.491
AAVKTLNPKAEVAR	Acetyl (N-term)	1508.87	P40227-2;P40227	CCT6A	T-complex protein 1 subunit zeta	0.86084	1.1743	0.86084	0.76128	1	1	2	3	0.0071864	54.524	39.963
FSETGAGKHVPR	Unmodified	1284.66	Q71U36-2;Q71U36;P68363;F5H5D3;Q9BQE3;F8VVB9;F8VQQ4;P68363-2;Q6PEY2;Q13748;Q13748-2;A0A1W2PQM2;F8VRK0;F8VX09;F8VWV9;F8VRZ4;F8VS66;F8W0F6	TUBA1A;TUBA1B;TUBA1C;TUBA3E;TUBA3C	Tubulin alpha-1A chain;Tubulin alpha-1B chain;Tubulin alpha-1C chain;Tubulin alpha-3E chain;Tubulin alpha-3C/D chain	0.8617	0.8617	NaN	NaN	1			3	0.010626	103.31	38.471
SQEEEKTEALTSAKR	Unmodified	1705.85	A0A0A0MS51;A0A0A0MT01;P06396-2;P06396-4;P06396-3;P06396;CON__Q3SX14	GSN	Gelsolin	0.86209	0.76607	0.70859	0.95818	2	3	2	3;4	0.0098136	109.07	60.668	+
ASGPPVSELITKAVAASKER	Unmodified	2010.11	P16403;P10412;P16402	HIST1H1C;HIST1H1E;HIST1H1D	Histone H1.2;Histone H1.4;Histone H1.3	0.86237	NaN	0.8475	0.8775		1	1	4	1.7436e-08	101.54	56.108
AEGPHGQFVSEKR	Unmodified	1440.71	P16152	CBR1	Carbonyl reductase [NADPH] 1	0.86449	0.86449	NaN	NaN	1			3	0.025914	105.25	63.009
GDTIVNVQQIDDGWMYGTVER	Unmodified	2395.11	Q14847;Q14847-3	LASP1	LIM and SH3 domain protein 1	0.86551	0.94901	0.78937	NaN	2	1		2;3	5.6374e-06	102.61	66.987
GMSKAEIGR	Oxidation (M)	963.481	Q96MW7	TIGD1	Tigger transposable element-derived protein 1	0.86709	0.92279	0.81474	NaN	1	1		2	0.016249	101.64	30.301
AGILQLVESVR	Unmodified	1183.69	P13489;H0YCR7	RNH1	Ribonuclease inhibitor	0.86728	NaN	NaN	0.86728			1	2	0.14636	85.676	26.695
TVLSGGTTMYPGIADR	Unmodified	1637.81	P63261;P60709	ACTG1;ACTB	Actin, cytoplasmic 2;Actin, cytoplasmic 2, N-terminally processed;Actin, cytoplasmic 1;Actin, cytoplasmic 1, N-terminally processed	0.86918	0.84319	0.88038	0.73393	2	2	1	2;3	3.7511e-223	263.74	184.54
ADSGEGDFLAEGGGVR	Unmodified	1535.69	P02671-2;P02671;A0A087WUA0	FGA	Fibrinogen alpha chain;Fibrinopeptide A;Fibrinogen alpha chain	0.8721	0.84152	0.83749	0.91323	1	1	3	2	1.207e-285	281.25	246.55
GASQAGMLAPGTR	Unmodified	1215.6	E9PDU6;Q15417-3;Q15417-2;Q15417	CNN3	Calponin;Calponin-3	0.87358	0.87358	0.84484	0.98762	1	1	1	2	0.0013612	136.96	81.893
NYLTSPLPEEVDETSAEDEGVSQR	Unmodified	2664.2	O00299	CLIC1	Chloride intracellular channel protein 1	0.874	0.73331	NaN	0.94334	1		2	3	7.8304e-10	98.299	72.312
SELQLVEQR	Unmodified	1100.58	H3BSW3;H3BQF1;H3BQZ9;H3BQB1;P07741-2;P07741	APRT	Adenine phosphoribosyltransferase	0.87511	0.87511	0.82656	0.92892	1	1	1	2	0.0030188	131.52	32.887
SVEGEGEEEGEEY	Unmodified	1441.54	Q71U36-2;Q71U36;P68363;P68363-2	TUBA1A;TUBA1B	Tubulin alpha-1A chain;Tubulin alpha-1B chain	0.8768	0.89081	0.86111	0.8001	1	1	1	2	0.0070166	133.57	129.56
EEVDELYR	Unmodified	1051.48	J3QRS3;P19105;O14950	MYL12A;MYL12B	Myosin regulatory light chain 12A;Myosin regulatory light chain 12B	0.87686	0.87686	0.84292	0.88873	1	1	1	2	0.063253	121.99	63.008
GKTIEAEAAHGTVTR	Unmodified	1539.8	H0YL11;P48735-2;P48735	IDH2	Isocitrate dehydrogenase [NADP], mitochondrial	0.87702	0.89557	0.8716	0.96246	3	3	3	2;3;4	6.2559e-16	158.11	81.883
SKLQDAEIAR	Unmodified	1129.61	R4GN98;P06703	S100A6	Protein S100;Protein S100-A6	0.87738	0.88789	NaN	0.86699	1		1	3	0.026557	94.82	13.986
DSFNTFFSETGAGKHVPR	Unmodified	1995.94	Q71U36-2;Q71U36;P68363;F5H5D3;Q9BQE3;F8VVB9;F8VQQ4;P68363-2;Q6PEY2;Q13748;Q13748-2;A0A1W2PQM2;F8VRK0;F8VX09;F8VWV9;F8VRZ4;F8VS66;F8W0F6	TUBA1A;TUBA1B;TUBA1C;TUBA3E;TUBA3C	Tubulin alpha-1A chain;Tubulin alpha-1B chain;Tubulin alpha-1C chain;Tubulin alpha-3E chain;Tubulin alpha-3C/D chain	0.87787	0.86835	0.86362	0.89234	5	5	5	3;4	1.7499e-08	144.18	104.55
IKEDGIVPLR	Unmodified	1138.67	O43396;K7EME7;K7ER96	TXNL1	Thioredoxin-like protein 1	0.87801	NaN	NaN	0.87801			1	3	0.16921	73.499	29.182
NNLECSSCVKVVEVIR	Unmodified	1904.94	A0A0A0MRA3;A0A0A0MTS7;Q8WZ42-3;Q8WZ42-10;Q8WZ42-9;Q8WZ42-5;Q8WZ42-11;Q8WZ42-4;Q8WZ42-7;Q8WZ42-2;Q8WZ42;Q8WZ42-8;Q8WZ42-13;Q8WZ42-12	TTN	Titin	0.87872	NaN	NaN	0.87872			1	2	0.026975	85.813	3.8931
SLLAGPVAEY	Unmodified	1018.53	Q5T0R8	CAP1	Adenylyl cyclase-associated protein	0.87936	0.87936	NaN	NaN	1			2	0.13008	77.058	37.411
SLLQDGEFSMDLR	Unmodified	1509.71	P07737;K7EJ44	PFN1	Profilin-1	0.88035	0.90347	0.84445	0.95083	2	2	2	2	0.00027255	160.77	111.97
FREPNAEVPR	Unmodified	1213.62	D6RF01;D6RF07;D6R918;D6RBC5;D6RDI5;D6RA54;D6RC55;D6R9T5;D6RG39;D6RIT9;D6RBN5;Q9NX40-3;Q9NX40-2;Q9NX40-4;Q9NX40	OCIAD1	OCIA domain-containing protein 1	0.8812	NaN	NaN	0.8812			1	3	0.035612	91.549	81.319
KHLSPDGQYVPR	Unmodified	1395.73	H7C3Z9;C9J3E2;B5MC07;O95994	AGR2	Anterior gradient protein 2 homolog	0.88185	0.89912	0.84396	0.87598	2	2	2	3	3.0386e-05	162.93	112.03
GTGQLLLPLSDAR	Unmodified	1339.75	Q15149-9;Q15149-7;Q15149-8;Q15149-5;Q15149-4;Q15149-6;Q15149-3;Q15149-2;Q15149	PLEC	Plectin	0.88194	0.88194	NaN	NaN	1		2	2	0.032258	101.39	33.689
ADLDKLNIDSIIQR	Acetyl (N-term)	1654.89	A0A087WYY5;F8VR82;F8VYE8;P36873;P36873-2	PPP1CC	Serine/threonine-protein phosphatase;Serine/threonine-protein phosphatase PP1-gamma catalytic subunit	0.88209	0.92828	NaN	0.85176	2		2	2;3	0.0075284	44.299	21.971
TVLSGGTTMYPGIADR	Oxidation (M)	1653.8	P63261;P60709	ACTG1;ACTB	Actin, cytoplasmic 2;Actin, cytoplasmic 2, N-terminally processed;Actin, cytoplasmic 1;Actin, cytoplasmic 1, N-terminally processed	0.8829	0.8284	1.7085	0.8829	1	1	1	2	0.0083556	102.87	76.086
SLIEIICSR	Unmodified	1089.59	H0YMD0;H0YMU9;H0YM50;H0YN42;P07355;P07355-2;H0YN28;H0YL33;H0YNP5;H0YNA0;H0YKS4;A6NMY6;H0YN52;H0YMM1;H0YLE2	ANXA2;ANXA2P2	Annexin;Annexin A2;Putative annexin A2-like protein	0.88358	0.92752	0.8375	0.89682	3	2	3	2	7.7556e-28	189.82	69.368
AFGEDSSSAMGVENR	Unmodified	1555.66	Q9Y2X3	NOP58	Nucleolar protein 58	0.88483	0.88483	NaN	NaN	1			2	0.024606	89.548	53.811
AQNLKDLAGR	Acetyl (N-term)	1126.61	F5H2D2;F5H0C5;F5H3X6;F5GY37;J3KPX7;Q99623-2;Q99623;F5GWA7	PHB2	Prohibitin-2	0.88529	0.88529	0.9016	0.83212	1	1	1	2	3.6707e-06	85.862	41.485
KAEAGAGSATEFQFR	Unmodified	1568.76	P46783;Q9NQ39	RPS10;RPS10P5	40S ribosomal protein S10;Putative 40S ribosomal protein S10-like	0.88863	NaN	0.74206	1.0641		1	1	3	0.0079464	120.21	95.706
AEVEETLKR	Acetyl (N-term)	1115.58	H3BNG9;H3BPA0;Q7Z4M1;H3BQI1;B1AKR6;Q9NP97-2;Q9NP97;Q8TF09	DYNLRB2;DYNLRB1	Dynein light chain roadblock-type 1;Dynein light chain roadblock-type 2	0.89028	0.87442	NaN	0.90643	1		1	2	2.2403e-13	143.61	84.693
AAELVALAQAVNAR	Unmodified	1395.78	P22314-2;P22314	UBA1	Ubiquitin-like modifier-activating enzyme 1	0.89117	0.89411	0.93912	0.70431	6	1	2	2;3	0.0542	94.616	56.53
DEETAPPVIAPR	Unmodified	1293.66	Q13177	PAK2	Serine/threonine-protein kinase PAK 2;PAK-2p27;PAK-2p34	0.89148	0.89148	NaN	NaN	1			2	0.12266	91.265	41.824
SGGKYVDSEGHLYTVPIR	Acetyl (N-term)	2019.01	Q03135	CAV1	Caveolin-1	0.89518	0.91674	0.87402	1.1401	1	3	4	3	3.1103e-11	61.821	22.006
YEEVGVDSVEGEGEEEGEEY	Unmodified	2232.87	Q71U36-2;Q71U36;P68363;P68363-2	TUBA1A;TUBA1B	Tubulin alpha-1A chain;Tubulin alpha-1B chain	0.8958	0.87768	0.8958	0.9788	1	1	1	2	1.7916e-05	106.26	74.91
SYKDSTLIMQLLR	Oxidation (M)	1582.84	E7EX29;P63104;K7EM20;B7Z2E6;H0YB80;B0AZS6;P63104-2;Q04917;P62258-2;P62258;P31946-2;P31946;P61981;P27348;P31947;P31947-2	YWHAZ;YWHAE;YWHAH;YWHAB;YWHAG;YWHAQ;SFN	14-3-3 protein zeta/delta;14-3-3 protein eta;14-3-3 protein epsilon;14-3-3 protein beta/alpha;14-3-3 protein beta/alpha, N-terminally processed;14-3-3 protein gamma;14-3-3 protein gamma, N-terminally processed;14-3-3 protein theta;14-3-3 protein sigma	0.90045	0.90045	NaN	NaN	1			3	0.055722	97.463	45.198
VNFINQNLR	Acetyl (N-term)	1158.61	P55957;P55957-2;P55957-4	BID	BH3-interacting domain death agonist;BH3-interacting domain death agonist p15;BH3-interacting domain death agonist p13;BH3-interacting domain death agonist p11	0.90479	NaN	0.90479	NaN		1		2	0.14942	45.718	13.783
CVGPEVEKACANPAAGSVILLENLR	Unmodified	2666.35	P00558-2;P00558	PGK1	Phosphoglycerate kinase 1	0.90509	0.92374	0.85879	0.78993	3	1	3	3;4	1.0208e-49	184.57	127.43
GAEREALKRR	Unmodified	1184.67	Q8TE49;Q8TE49-2	OTUD7A	OTU domain-containing protein 7A	0.90562	0.94195	0.90562	0.59948	1	1	1	2	0.030962	93.162	49.528
TQGTKIASDGLKGR	Unmodified	1430.78	D6RED7;D6RAS7;H0Y8L7;D6RB09;E9PFI5;D6RG13;D6RAT0;P61247;D6RGE0;D6RI02;H0Y9Y4	RPS3A	40S ribosomal protein S3a	0.90698	0.91845	0.90134	0.90698	1	1	1	4	0.014745	95.183	41.616
DNIQGITKPAIR	Unmodified	1324.75	P62805	HIST1H4A	Histone H4	0.90932	1.0321	0.85335	0.90932	2	2	1	2;3	0.012022	117.25	63.494
GCGDQTLGDLLLTPTR	Unmodified	1715.85	P22102	GART	Trifunctional purine biosynthetic protein adenosine-3;Phosphoribosylamine--glycine ligase;Phosphoribosylformylglycinamidine cyclo-ligase;Phosphoribosylglycinamide formyltransferase	0.90988	1.0634	0.77855	NaN	1	1		2	1.1924e-05	179.59	96.406
EELGGTPVQSR	Unmodified	1171.58	A0A0A0MS51;A0A0A0MT01;P06396-2;P06396-4;P06396-3;P06396;CON__Q3SX14	GSN	Gelsolin	0.91068	NaN	0.95305	0.8702		2	1	2	9.8885e-83	202.44	81.572	+
FIEAEDDLSSFR	Unmodified	1427.66	B1ALD9;Q15063-4;Q15063-2;Q15063-3;Q15063-5;Q15063;Q15063-7;Q15063-6	POSTN	Periostin	0.91151	1.625	0.51128	NaN	1	1		2	0.02735	94.409	35.733	+
EVTIVNILTNR	Unmodified	1270.72	H0YMD0;H0YMU9;H0YM50;H0YN42;P07355;P07355-2;H0YKS4;H0YMM1;H0YMD9;H0YKV8;H0YKL9;H0YKZ7;H0YLV6;H0YMT9;H0YKX9;H0YMW4	ANXA2	Annexin;Annexin A2	0.91214	0.96438	0.83322	0.87544	2	1	1	2;3	1.373e-07	158.79	90.893
SFNTFFSETGAGKHVPR	Unmodified	1880.92	Q71U36-2;Q71U36;P68363;F5H5D3;Q9BQE3;F8VVB9;F8VQQ4;P68363-2;Q6PEY2;Q13748;Q13748-2;A0A1W2PQM2;F8VRK0;F8VX09;F8VWV9;F8VRZ4;F8VS66;F8W0F6	TUBA1A;TUBA1B;TUBA1C;TUBA3E;TUBA3C	Tubulin alpha-1A chain;Tubulin alpha-1B chain;Tubulin alpha-1C chain;Tubulin alpha-3E chain;Tubulin alpha-3C/D chain	0.91239	NaN	NaN	0.91239			1	4	0.17182	63.062	31.148
YELIDQDAR	Unmodified	1121.54	H0YMD0;H0YMU9;H0YM50;H0YN42;P07355;P07355-2;H0YN28;H0YL33;H0YNP5;H0YNA0	ANXA2	Annexin;Annexin A2	0.9125	0.87971	0.9125	0.94442	1	1	1	2	0.018343	99.136	46.35
GEEEDGDEDEEAESATGKR	Unmodified	2051.8	B8ZZA1;B8ZZW7;H7C2N1;P06454-2;P06454	PTMA	Prothymosin alpha;Prothymosin alpha, N-terminally processed;Thymosin alpha-1	0.91343	0.91631	1.237	0.76886	4	3	4	2;3	9.3926e-156	243.86	180.32
GAPEVLVSAPR	Unmodified	1094.61	Q7Z4H8	KDELC2	KDEL motif-containing protein 2	0.91376	1.0746	0.91376	0.86939	1	1	2	2	0.01039	129.85	69.832
ATVTATTKVPEIR	Acetyl (N-term)	1427.8	M0QXZ7;M0R0Z0;X6R2L4;Q9Y230	RUVBL2	RuvB-like 2	0.91518	0.88147	0.95018	NaN	1	1		2	0.013179	38.238	21.606
LQSIGTENTEENR	Unmodified	1489.7	H3BMQ8;H3BUH7;H3BR04;H3BPS8;H3BQN4;J3KPS3;P04075;P04075-2	ALDOA	Fructose-bisphosphate aldolase;Fructose-bisphosphate aldolase A	0.91601	NaN	NaN	0.91601			1	2	0.1712	81.017	12.17
GHGEQQPQPPATQQQQPQQQR	Unmodified	2395.14	A0A1W2PP35;A0A1X7SBS1;A0A1W2PPS1;Q00839-2;Q00839;A0A1W2PP22	HNRNPU	Heterogeneous nuclear ribonucleoprotein U	0.91648	0.83121	0.94574	0.91648	2	3	5	3	1.9433e-85	211.13	185.62
SAGEECDAAEGAEN	Unmodified	1408.5	P27348	YWHAQ	14-3-3 protein theta	0.91666	0.91666	NaN	NaN	1			2	0.038387	97.472	63.285
THLGGEDFDNR	Unmodified	1259.55	A0A0G2JIW1;P0DMV8-2;P0DMV9;P0DMV8;V9GZ37;E9PKE3;P11142;P11142-2;E9PN89;Q53FA3;P34931;P17066;P48741	HSPA1A;HSPA1B;HSPA8;HSPA1L;HSPA6;HSPA7	Heat shock 70 kDa protein 1A;Heat shock 70 kDa protein 1B;Heat shock cognate 71 kDa protein;Heat shock 70 kDa protein 1-like;Heat shock 70 kDa protein 6;Putative heat shock 70 kDa protein 7	0.9169	0.88971	0.94687	0.94765	2	2	2	2;3	1.3499e-07	163.12	135.25
MLGPEGGEGFVVKLR	Oxidation (M);Acetyl (N-term)	1645.85	A0A1B0GW42;P52597	HNRNPF	Heterogeneous nuclear ribonucleoprotein F;Heterogeneous nuclear ribonucleoprotein F, N-terminally processed	0.9195	0.94374	0.89588	1.3353	2	1	2	2;3	3.6646e-05	143	75.883
AVGGEALGR	Unmodified	828.445	E9PFT6;P02042;E9PEW8	HBD	Hemoglobin subunit delta	0.92136	1.016	0.87677	0.92136	1	1	1	2	1.8034e-12	152.47	47.27
GNEEDKENQGDETQGQQPPQR	Unmodified	2383.03	H0Y449;P67809	YBX1	Nuclease-sensitive element-binding protein 1	0.9226	0.9226	0.77188	1.0663	1	1	1	3	1.8634e-249	266.99	216.33
RFTDEEVDELYR	Unmodified	1570.73	J3QRS3;P19105;O14950	MYL12A;MYL12B	Myosin regulatory light chain 12A;Myosin regulatory light chain 12B	0.92424	0.92011	0.83939	0.98887	1	1	3	3	0.0064537	110.38	77.447
IAVDGEPLGR	Unmodified	1025.55	F8WE65;C9J5S7;P62937;E5RIZ5	PPIA	Peptidyl-prolyl cis-trans isomerase;Peptidyl-prolyl cis-trans isomerase A;Peptidyl-prolyl cis-trans isomerase A, N-terminally processed	0.92471	0.91759	0.9143	0.96824	2	1	1	2	0.0071428	110.41	31.638
CRLEELGLAGR	Unmodified	1272.66	Q9UBN7-2;Q9UBN7	HDAC6	Histone deacetylase 6	0.92837	0.8939	0.92837	1.2044	1	1	1	3	0.015985	97.597	35.832
TPVEPEVAIHR	Unmodified	1246.67	E5RJX2;P60866;P60866-2;E5RIP1	RPS20	40S ribosomal protein S20	0.9284	0.96373	NaN	0.89438	1		1	3	0.029602	80.979	40.39
GLLSQGSPLSWEETKR	Unmodified	1786.92	D6RGF8;A0A0C4DGB2;E1CEI4;P48506	GCLC	Glutamate--cysteine ligase catalytic subunit	0.92898	0.89617	NaN	0.96298	1		1	3	0.034338	83.856	24.562
GGVVLISGTGSNCR	Unmodified	1375.69	H7C1L7;H7C3G9;Q9UJ70;Q9UJ70-2;H0YE82;H0YC94;H0YEB7;C9JEV6	NAGK	N-acetyl-D-glucosamine kinase	0.92902	2.2877	0.92902	0.77934	1	1	1	2	0.1361	78.653	6.4093
AGGKSWCPDCVQAEPVVR	Unmodified	2014.94	I3L0K2;I3L3M7;Q9BRA2	TXNDC17	Thioredoxin domain-containing protein 17	0.92913	1.0839	0.90055	0.88436	3	2	1	3	4.6107e-07	130.87	91.443
SIHVVEVQEKSSGR	Unmodified	1553.82	B1AK85;B1AK88;P47756-2;P47756;B1AK87	CAPZB	F-actin-capping protein subunit beta	0.93134	0.89317	0.93134	1.1527	1	2	1	3;4	0.00052088	139.19	116.96
SLSGTQVDEGVR	Unmodified	1246.62	Q14195;H0YBT4;Q14195-2	DPYSL3	Dihydropyrimidinase-related protein 3	0.93151	0.93151	NaN	NaN	1			2	0.19996	67.93	48.144
AHTKEIDLVNR	Unmodified	1294.7	Q03135;C9JKI3;E9PCT5;Q03135-2	CAV1	Caveolin-1;Caveolin	0.93254	0.93254	NaN	NaN	1			3	0.14064	75.229	67.178
LAGSIIGKGGQR	Unmodified	1155.67	P61978-3;P61978;P61978-2;S4R359	HNRNPK	Heterogeneous nuclear ribonucleoprotein K	0.93495	0.94602	0.92401	NaN	1	1		3	0.02069	96.756	6.0989
VVEHPEFLKAGKEPGLQIWR	Unmodified	2332.27	A0A0A0MS51;A0A0A0MT01;P06396-2;P06396-4;P06396-3;P06396;CON__Q3SX14;A0A0U1RQL8;Q5T0I0	GSN	Gelsolin	0.93562	0.91775	0.97433	0.93562	1	1	1	5	0.013589	80.545	48.662	+
EGNYLDDALVR	Unmodified	1263.61	Q6P452;P09525;P09525-2	ANXA4	Annexin;Annexin A4	0.93598	NaN	0.93598	NaN		1		2	0.10931	97.597	48.174
SVISLSGDHCIIGR	Unmodified	1512.77	H7BYH4;P00441	SOD1	Superoxide dismutase [Cu-Zn]	0.93924	0.95662	1.5086	0.93342	5	2	2	2;3	1.1378e-132	245.15	214.15
APDVEPLEPTLSNIIEQR	Unmodified	2020.05	K7ERW9;O43681	ASNA1	ATPase ASNA1	0.93975	0.98879	0.89314	0.89112	1	1	1	3	0.0010548	101.05	62.915
AKEQEMTEMR	Unmodified	1251.56	Q03252	LMNB2	Lamin-B2	0.94143	1.1061	0.94143	0.91224	1	1	1	3	9.1047e-05	130.01	87.668
VQKESQATLEER	Unmodified	1416.72	O60502-3;O60502-2;O60502-4;O60502	MGEA5	Protein O-GlcNAcase	0.94246	0.94246	NaN	NaN	1			3	0.0069692	134.18	60.01
DTSAAVTEEMPPLEGDDDTSR	Unmodified	2234.95	P07900;P07900-2;Q58FG1	HSP90AA1;HSP90AA4P	Heat shock protein HSP 90-alpha;Putative heat shock protein HSP 90-alpha A4	0.94422	0.82404	0.94422	1.0939	2	2	2	2;3	2.0377e-167	246.64	191.38
GSTIEIGPSR	Unmodified	1015.53	R4GMT0;P61163	ACTR1A	Alpha-centractin	0.94474	0.91873	0.97149	0.89626	1	1	1	2	5.6344e-06	136.99	52.491
TVVQPSVGAAAGPVVPPCPGR	Unmodified	2015.06	C9JV77;P02765	AHSG	Alpha-2-HS-glycoprotein;Alpha-2-HS-glycoprotein chain A;Alpha-2-HS-glycoprotein chain B	0.94505	1.0032	0.86077	0.94505	2	4	2	2;3	3.2177e-14	167.89	120.6
GGGGNFGPGPGSNFR	Unmodified	1376.62	P22626;P22626-2	HNRNPA2B1	Heterogeneous nuclear ribonucleoproteins A2/B1	0.94691	0.96155	0.90927	0.94691	1	1	1	2	0.0071179	122.33	61.164
YSKNLVTEDVMR	Unmodified	1453.72	K7EQ48;A0A0A0MTS2;P06744;P06744-2;K7EIL4;K7ERK8;K7ELR7;K7EP41;K7ERC6;K7ENA0;K7EPY4;A0A0J9YXP8;A0A0J9YX90;A0A0J9YYH3	GPI	Glucose-6-phosphate isomerase	0.94852	1.2278	0.94125	0.79072	1	1	2	3	0.095241	77.894	31.736
NEAIYDICR	Unmodified	1152.52	Q71U36-2;Q71U36;P68363;F5H5D3;Q9BQE3;F8VVB9;F8VQQ4;Q6PEY2;Q13748;Q13748-2;C9J2C0;Q9NY65-2;Q9NY65;C9JDS9;P68366-2;P68366	TUBA1A;TUBA1B;TUBA1C;TUBA3E;TUBA3C;TUBA8;TUBA4A	Tubulin alpha-1A chain;Tubulin alpha-1B chain;Tubulin alpha-1C chain;Tubulin alpha-3E chain;Tubulin alpha-3C/D chain;Tubulin alpha-8 chain;Tubulin alpha-4A chain	0.94952	0.95159	0.94178	0.9325	1	1	1	2	0.0071815	115.7	101.03
VSIEDSVISLSGDHCIIGR	Unmodified	2056.03	H7BYH4;P00441	SOD1	Superoxide dismutase [Cu-Zn]	0.94966	1.0642	0.92639	0.97351	2	1	1	3	2.7781e-77	212.95	138.66
GQVAELLLR	Unmodified	997.592	K7EK06;K7ER16;Q9Y285-2;Q9Y285	FARSA	Phenylalanine--tRNA ligase alpha subunit	0.94973	NaN	NaN	0.94973			1	2	0.12388	82.75	20.092
ANSCQIIIPQNQVNR	Unmodified	1753.89	Q5SX91;P50395-2;P50395;P31150	GDI2;GDI1	Rab GDP dissociation inhibitor beta;Rab GDP dissociation inhibitor alpha	0.9508	0.96149	0.88771	0.89406	2	2	3	2;3	0.00049164	136.96	136.96
TGEGWETVEMHPAYTEEELR	Unmodified	2363.04	Q02818	NUCB1	Nucleobindin-1	0.95281	NaN	0.95281	NaN		1		3	0.029008	74.732	36.639
SYVGDEAQSKR	Unmodified	1238.59	P63261;P60709;A6NL76;I3L3I0;I3L1U9;G5E9R0;C9JFL5;F6UVQ4;F6QUT6;E7EVS6;I3L3R2;J3KT65;I3L4N8;C9JTX5;C9JUM1;C9JZR7;F8WB63;B8ZZJ2;K7EM38;P63267;P68032;P62736;P68133	ACTG1;ACTB;ACTA1;ACTG2;ACTA2;ACTC1	Actin, cytoplasmic 2;Actin, cytoplasmic 2, N-terminally processed;Actin, cytoplasmic 1;Actin, cytoplasmic 1, N-terminally processed;Actin, gamma-enteric smooth muscle;Actin, alpha cardiac muscle 1;Actin, aortic smooth muscle;Actin, alpha skeletal muscle	0.95396	1.0446	0.9631	0.83945	2	2	2	2;3	8.5914e-18	181.53	125.52
DEVGDGTTSVTVLAAELLR	Unmodified	1945	F5GWF6;P78371;F8VQ14;P78371-2	CCT2	T-complex protein 1 subunit beta	0.9565	0.9565	NaN	NaN	1			2	8.8487e-06	101.3	58.515
ADAVAVTMGPKGR	Unmodified	1271.67	P10809;E7EXB4;E7ESH4;C9JL25;P10809-2;C9JL19;C9JCQ4	HSPD1	60 kDa heat shock protein, mitochondrial	0.95723	0.65576	0.96674	0.95723	1	1	1	3	0.048845	88.021	21.059
ASLSLPSR	Unmodified	829.466	Q05682;C9J813;E9PGZ1;E7EX44;Q05682-5;Q05682-4;Q05682-3;Q05682-6;Q05682-2;Q9C0J1-2;Q9C0J1	CALD1;B3GNT4	Caldesmon;N-acetyllactosaminide beta-1,3-N-acetylglucosaminyltransferase 4	0.95751	0.85601	NaN	1.071	1		1	2	0.054242	111.82	0
TEVVCAPPTAYIDFAR	Unmodified	1808.88	P60174-1;P60174	TPI1	Triosephosphate isomerase	0.95927	1.5297	0.81838	0.93195	3	2	2	2;3	0.00016002	140.39	97.083
EHKACFAELR	Unmodified	1259.61	Q9Y6K5	OAS3	2'-5'-oligoadenylate synthase 3	0.96072	0.96072	NaN	NaN	1			2	0.19028	71.614	17.646
ASESFEDVGHSSDAR	Unmodified	1592.67	D6RFH4;H3BUX2;J3KNF8;O43169	CYB5B	Cytochrome b5 type B	0.96256	1.0083	0.84669	0.96256	1	1	1	3	0.010041	110.55	82.884
GMDNQGGYGSVGR	Unmodified	1296.55	P31942-2;P31942;P31942-4;P31942-3	HNRNPH3	Heterogeneous nuclear ribonucleoprotein H3	0.96322	1.0265	0.90387	NaN	1	1		2	0.012894	126.19	106.05
TMYPGIADR	Unmodified	1022.49	P63261;P60709;A6NL76;Q562R1;P63267;P68032;P62736;P68133;P63267-2	ACTG1;ACTB;ACTA1;ACTBL2;ACTG2;ACTC1;ACTA2	Actin, cytoplasmic 2;Actin, cytoplasmic 2, N-terminally processed;Actin, cytoplasmic 1;Actin, cytoplasmic 1, N-terminally processed;Beta-actin-like protein 2;Actin, gamma-enteric smooth muscle;Actin, alpha cardiac muscle 1;Actin, aortic smooth muscle;Actin, alpha skeletal muscle	0.96398	0.96398	1.136	0.78972	1	1	1	2	0.016541	101.28	40.496
GDEDEEAESATGKR	Unmodified	1492.63	B8ZZA1;B8ZZW7;H7C2N1;P06454-2;P06454;B8ZZQ6	PTMA	Prothymosin alpha;Prothymosin alpha, N-terminally processed;Thymosin alpha-1	0.9675	0.89224	1.1259	1.0292	3	3	2	2;3	2.7423e-132	241.39	241.39
DALVQVYPDGIR	Unmodified	1344.7	Q15393	SF3B3	Splicing factor 3B subunit 3	0.96813	0.96813	NaN	NaN	1			2	0.095948	93.561	29.264
MLGTEGGEGFVVKVR	Acetyl (N-term)	1619.83	D6RF17;D6RDL0;E7EQJ0;D6RAM1;D6R9T0;D6RFM3;D6RIT2;E7EN40;D6RIU0;D6RDU3;D6RJ04;D6RIH9;D6RBM0;E9PCY7;G8JLB6;P31943;E5RJ94;D6R9D3;E5RGV0	HNRNPH1	Heterogeneous nuclear ribonucleoprotein H;Heterogeneous nuclear ribonucleoprotein H, N-terminally processed	0.9686	0.9686	0.86734	0.94327	1	1	1	2	0.0049052	104.82	53.062
EQAIVDVVANR	Unmodified	1212.65	P20073-2;P20073	ANXA7	Annexin A7	0.96946	NaN	1.1213	0.83817		1	1	2	0.0063661	108.7	12.355
GKPVNLGLWDTAGQEDYDR	Unmodified	2133.01	J3KSC4;J3QLK0;P63000;P60763;P63000-2	RAC3;RAC1	Ras-related C3 botulinum toxin substrate 1;Ras-related C3 botulinum toxin substrate 3	0.97043	1.0195	0.97043	0.9775	3	3	2	3	0.00011826	142.72	118.85
ATIASLEETNR	Unmodified	1203.61	O75116;Q14DU5;E9PF63	ROCK2	Rho-associated protein kinase 2	0.97458	NaN	0.97458	NaN		1		2	0.010629	114.97	43.619
LEPGTMDSVR	Unmodified	1103.53	Q5JP53;P07437;A0A0B4J269;Q13509;Q9BUF5;K7EK43;K7ESQ3;G3V5W4;K7EQT3;K7EJ64;K7ERA8;K7EJZ4;G3V2R8;A0A075B724;K7EL29;K7EN98;K7EPE5;G3V3R4;G3V2N6;Q3ZCM7;P68371;P04350;M0R0X0;M0QY85;M0QY37;M0QX14;M0QZL7;M0R278;Q9BVA1;Q13885	TUBB;TUBB3;TUBB6;TUBB8;TUBB4B;TUBB4A;TUBB2B;TUBB2A	Tubulin beta chain;Tubulin beta-3 chain;Tubulin beta-6 chain;Tubulin beta-8 chain;Tubulin beta-4B chain;Tubulin beta-4A chain;Tubulin beta-2B chain;Tubulin beta-2A chain	0.97462	0.95261	0.99173	0.97462	1	1	1	2	0.00091813	117.89	36.593
ALSKEGIVALR	Unmodified	1155.7	P40227-2;P40227	CCT6A	T-complex protein 1 subunit zeta	0.97638	0.89939	0.97638	1.0334	1	1	1	3	0.0030817	111.86	26.048
EQTQAFIDAAQEAR	Unmodified	1576.75	K7ELL7;P14314-2;P14314;A0A0C4DGP4	PRKCSH	Glucosidase 2 subunit beta	0.97724	1.3561	0.91134	0.97724	2	1	1	2	0.00056517	136.7	65.248
AVPPTYADLGKSAR	Acetyl (N-term)	1486.78	C9JI87;P21796	VDAC1	Voltage-dependent anion-selective channel protein 1	0.97747	0.89138	0.9723	0.98267	2	1	1	2	0.0071183	103.43	77.388
VTVPCPVPPPPPCCHPR	Unmodified	1965.94	A0A0G2JMB2			0.97805	0.92573	1.0163	0.97805	1	1	1	3	0.0038029	104.9	76.795
NEALYDICFR	Unmodified	1299.59	Q5JP53;P07437;A0A0B4J269;Q13509;Q9BUF5;Q5ST81;G3V2A3;Q13509-2;M0R042;K7ESM5;CON__ENSEMBL:ENSBTAP00000025008;Q9H4B7;P68371;P04350;M0R2D3;M0QYM7;Q9BVA1;Q13885	TUBB;TUBB3;TUBB6;TUBB4A;TUBB1;TUBB4B;TUBB2B;TUBB2A	Tubulin beta chain;Tubulin beta-3 chain;Tubulin beta-6 chain;Tubulin beta-1 chain;Tubulin beta-4B chain;Tubulin beta-4A chain;Tubulin beta-2B chain;Tubulin beta-2A chain	0.97927	0.97927	NaN	0.96568	1		2	2	0.0003296	120.45	87.453
IERPTYTNLNR	Unmodified	1375.72	Q71U36-2;Q71U36;P68363;F5H5D3;Q9BQE3;F8VVB9;F8VQQ4;Q6PEY2;Q13748;Q13748-2;C9J2C0;Q9NY65-2;Q9NY65;C9JDS9;Q9H853;P68366-2;P68366	TUBA1A;TUBA1B;TUBA1C;TUBA3E;TUBA3C;TUBA8;TUBA4A;TUBA4B	Tubulin alpha-1A chain;Tubulin alpha-1B chain;Tubulin alpha-1C chain;Tubulin alpha-3E chain;Tubulin alpha-3C/D chain;Tubulin alpha-8 chain;Putative tubulin-like protein alpha-4B;Tubulin alpha-4A chain	0.9803	0.9803	0.9781	0.89106	1	1	1	3	0.030391	94.363	21.929
AEMLEDEAGGGGAGPGGACKAEPR	Unmodified	2286	H3BQZ7;Q1KMD3	HNRNPUL2-BSCL2;HNRNPUL2	Heterogeneous nuclear ribonucleoprotein U-like protein 2	0.98115	NaN	0.98115	NaN	2	1		3	1.18e-11	135.21	89.298
SHQTGIQASEDVKEIFAR	Acetyl (N-term)	2057.02	F8VRG3;Q12792;Q12792-3	TWF1	Twinfilin-1	0.98176	0.98176	1.05	0.73195	2	1	1	3	7.7692e-05	91.616	46.882
ANKGPSYGMSR	Acetyl (N-term)	1208.56	Q01995;E9PJ32	TAGLN	Transgelin	0.98217	NaN	NaN	0.98217			1	2	0.00057235	69.275	6.2
GAISTIVLR	Unmodified	928.571	P50990-3;P50990-2;P50990	CCT8	T-complex protein 1 subunit theta	0.98226	0.98226	0.97801	1.0213	1	1	1	2	6.9892e-21	180.93	94.06
GEGVSVSAPGKTLPSSGPQNLR	Unmodified	2137.11	J3QT83;Q05707-3;Q05707-2;Q05707	COL14A1	Collagen alpha-1(XIV) chain	0.98237	1.1255	0.98237	0.71245	1	2	1	3	5.7971e-11	124.63	90.74
DYLDQPCYETINR	Unmodified	1685.74	Q5SX91;P50395-2;P50395;Q5SX87	GDI2	Rab GDP dissociation inhibitor beta	0.9828	0.9808	0.9828	0.91966	1	1	1	2	0.0011894	155.26	90.965
AEKTFEEKQGTEIDGR	Unmodified	1836.89	P19338;H7BY16	NCL	Nucleolin	0.98313	NaN	1.0756	0.89865		1	1	3	0.030631	84.62	51.623
GVANALDNVDAR	Unmodified	1213.61	P22314-2;P22314	UBA1	Ubiquitin-like modifier-activating enzyme 1	0.98405	0.98405	NaN	NaN	3			2	0.01904	144.65	80.083
ASSVSNNYIQTLGR	Unmodified	1508.76	C9JZR2;O60716-24;O60716-23;O60716-21;O60716-19;O60716-22;O60716-20;O60716-16;O60716-18;O60716-15;O60716-17;O60716-13;O60716-11;O60716-14;O60716-12;O60716-10;O60716-8;O60716-9;O60716-7;O60716-5;O60716-3;O60716-6;O60716-4;O60716-2;O60716;E9PRE2;E9PKL1	CTNND1	Catenin delta-1	0.98499	0.98499	NaN	NaN	1	1		2	0.040299	96.82	46.015
EELNKLLGR	Unmodified	1070.61	Q93077;Q7L7L0;P04908	HIST1H2AC;HIST3H2A;HIST1H2AB	Histone H2A type 1-C;Histone H2A type 3;Histone H2A type 1-B/E	0.98526	0.98526	0.80442	1.1709	1	1	1	2	0.010526	109.48	46.763
DDVSPFLEGLEER	Unmodified	1504.7	F5GX11;P25786;P25786-2	PSMA1	Proteasome subunit alpha type-1	0.98584	1.0226	0.98969	0.92059	1	1	2	2	0.001443	136.5	85.709
MLGPEGGEGFVVKLR	Acetyl (N-term)	1629.85	A0A1B0GW42;P52597	HNRNPF	Heterogeneous nuclear ribonucleoprotein F;Heterogeneous nuclear ribonucleoprotein F, N-terminally processed	0.98777	0.97091	0.98777	1.0394	1	1	1	2	0.0085113	110.86	67.345
MQKQGCDCECLGGGR	Unmodified	1754.7	Q9NRX4-2;Q9NRX4	PHPT1	14 kDa phosphohistidine phosphatase	0.98832	NaN	0.98355	0.99312		1	1	3	0.018982	90.725	66.31
GQVITIGNER	Unmodified	1085.58	P63261;P60709;Q6S8J3;Q9BYX7;A5A3E0;Q562R1;P63267;P68032;P62736;P68133;P63267-2	ACTG1;ACTB;POTEE;POTEKP;POTEF;ACTBL2;ACTG2;ACTC1;ACTA2;ACTA1	Actin, cytoplasmic 2;Actin, cytoplasmic 2, N-terminally processed;Actin, cytoplasmic 1;Actin, cytoplasmic 1, N-terminally processed;POTE ankyrin domain family member E;Putative beta-actin-like protein 3;Putative beta-actin-like protein 3, N-terminally processed;POTE ankyrin domain family member F;Beta-actin-like protein 2;Actin, gamma-enteric smooth muscle;Actin, alpha cardiac muscle 1;Actin, aor…	0.9908	1.0569	1.0692	0.95388	8	2	4	2	1.1737e-143	249.69	172.84
MIEVVCNDR	Unmodified	1134.52	K7EQ43;Q9BZL1	UBL5	Ubiquitin-like protein 5	0.99113	1.0893	0.90179	0.88562	1	1	1	2	0.044674	94.302	30.823
EMVSLKDYCTR	Unmodified	1400.64	P07900;P07900-2	HSP90AA1	Heat shock protein HSP 90-alpha	0.99121	1.0741	0.99974	0.98275	2	1	1	3	0.14273	91.469	37.718
AVSTGVKVPR	Acetyl (N-term)	1054.61	H0YBX6;Q15819	UBE2V2	Ubiquitin-conjugating enzyme E2 variant 2	0.99236	0.88644	0.99236	1.0023	1	1	1	2	8.0066e-05	107.01	52.231
GVAVIPVLQR	Unmodified	1050.65	H0YEY4;A6NCQ0;A6NJU6;A6NFX8;Q9UKK9	NUDT5	ADP-sugar pyrophosphatase	0.99239	1.1243	0.9739	0.99239	1	1	1	2	6.2753e-05	131.04	94.851
DDDVSPFLEGLEER	Unmodified	1619.73	F5GX11;P25786;P25786-2	PSMA1	Proteasome subunit alpha type-1	0.99568	1.0563	0.96146	0.99568	1	1	1	2	0.0016326	145.23	102.42
EDEDLEELEVLER	Unmodified	1616.74	Q9NQC3-2;Q9NQC3-5;Q9NQC3;F8W914;Q9NQC3-4	RTN4	Reticulon-4;Reticulon	0.99634	1.01	0.88497	0.99634	1	1	1	2	3.5295e-11	176.78	95.759
GADFAKWR	Unmodified	949.477	K7EKH5;C9J8F3;J3KSV6;J3QKP5;A8MVZ9;P09972;H3BMQ8;H3BUH7;H3BR04;H3BPS8;H3BQN4;J3KPS3;P04075;P04075-2;H3BU78	ALDOC;ALDOA	Fructose-bisphosphate aldolase;Fructose-bisphosphate aldolase C;Fructose-bisphosphate aldolase A	0.99927	1.1138	0.90833	0.99927	1	1	1	2	0.12912	89.296	42.87
ESETTTSLVLER	Unmodified	1363.68	C9J8J0;C9K0U8;A0A0G2JLD8;E7EUY5;Q04837	SSBP1	Single-stranded DNA-binding protein, mitochondrial	0.99976	0.98555	0.99976	1.0757	1	1	1	2	2.996e-17	181.53	140.65
CILPPTRPTDKPLR	Unmodified	1662.92	A0A087WVQ9;P68104-2;Q5VTE0;P68104;A0A087WV01	EEF1A1;EEF1A1P5	Elongation factor 1-alpha 1;Putative elongation factor 1-alpha-like 3;Elongation factor 1-alpha	0.99999	0.93661	0.93795	1.1267	2	2	2	3;4	0.066042	84.605	45.932
AAGFKTVEPLEYYR	Acetyl (N-term)	1684.85	Q96B26	EXOSC8	Exosome complex component RRP43	1.001	1.0075	1.001	0.93729	2	1	1	2	0.007726	38.875	18.668
AKILNDVQDR	Unmodified	1170.64	H0Y400;A0A0G2JJZ9;O00148;Q13838;Q13838-2	DDX39B;DDX39A	ATP-dependent RNA helicase DDX39A;Spliceosome RNA helicase DDX39B	1.0011	1.0011	1.0133	0.95492	1	1	1	2	0.085551	78.098	36.222
RPQEADGIDSVIVVDNVPQVGPDR	Unmodified	2574.3	C9JZG1;P55884;P55884-2	EIF3B	Eukaryotic translation initiation factor 3 subunit B	1.0012	1.0378	0.96593	NaN	1	1		3	7.6375e-15	110.4	55.737
DVDSRDRRR	Unmodified	1173.6	J3KNV4;Q13683-13;Q13683-9;Q13683-7;Q13683-3;Q13683-10;Q13683	ITGA7	Integrin alpha-7;Integrin alpha-7 heavy chain;Integrin alpha-7 light chain;Integrin alpha-7 70 kDa form	1.0017	1.0017	0.99948	1.0759	1	1	1	2	0.054654	92.47	57.318
GKVNVDEVGGEALGR	Unmodified	1498.77	P68871;F8W6P5	HBB	Hemoglobin subunit beta;LVV-hemorphin-7;Spinorphin	1.0024	0.95087	1.0164	0.93465	1	1	1	3	0.009707	97.904	83.865
ALETVPKDLR	Acetyl (N-term)	1182.66	J3KSQ6;J3QR04;P63272	SUPT4H1	Transcription elongation factor SPT4	1.0035	1.0059	0.98164	1.0035	1	1	1	2	5.6544e-05	67.993	35.1
GPSKVKMDCQECPEGYR	Unmodified	2039.89	P21333-2;P21333;Q60FE5;Q5HY54;A0A087WWY3	FLNA	Filamin-A	1.0038	1.0038	0.76791	2.0384	1	1	2	3	0.001383	145.7	135.3
SEEILAGYKR	Unmodified	1164.61	O43776	NARS	Asparagine--tRNA ligase, cytoplasmic	1.0038	1.0038	NaN	NaN	1			3	0.19816	70.908	10.889
VLTTGAGNPVGDKLNVITVGPR	Unmodified	2177.22	P04040	CAT	Catalase	1.0043	NaN	1.0043	NaN		2		3	0.00062305	87.772	47.279
EVGANRQAINAALTQATR	Unmodified	1883	Q9BYE9	CDHR2	Cadherin-related family member 2	1.0044	1.0044	NaN	NaN	1			2	0.030042	74.537	44.849
LISESPIKGR	Unmodified	1098.64	P61978-3;P61978;P61978-2;Q5T6W2	HNRNPK	Heterogeneous nuclear ribonucleoprotein K	1.0066	1.3606	0.74465	NaN	1	1	1	3	0.07611	83.647	2.122
EEAKTTTTNTQVEGDDEAAFLER	Unmodified	2554.17	Q05682;C9J813;E9PGZ1;E7EX44;Q05682-5;Q05682-4;Q05682-3;Q05682-6;Q05682-2;C9JEK3	CALD1	Caldesmon	1.009	NaN	1.0399	0.97893		1	1	3	4.4542e-09	100.85	79.376
NPGVVTCLDEAR	Unmodified	1329.63	P22314-2;P22314;Q5JRR9;Q5JRS0	UBA1	Ubiquitin-like modifier-activating enzyme 1	1.0094	0.80527	1.0094	1.0935	1	1	1	2	0.012794	100.55	49.118
VGNAEVKLEEENR	Unmodified	1485.74	C9JSP1;C9JQ75;C9J0M4;P51572;P51572-2	BCAP31	B-cell receptor-associated protein 31	1.0112	1.0476	0.68275	0.65425	1	1	1	3	0.089804	77.279	30.036
KGVVPLAGTDGETTTQGLDGLSER	Unmodified	2400.21	K7EKH5;C9J8F3;J3KSV6;J3QKP5;A8MVZ9;P09972	ALDOC	Fructose-bisphosphate aldolase;Fructose-bisphosphate aldolase C	1.0125	1.0112	1.0118	1.1105	5	3	1	3	5.1847e-15	121.38	76.995
TIEIITDR	Unmodified	959.529	P22626;A0A087WUI2;P22626-2	HNRNPA2B1	Heterogeneous nuclear ribonucleoproteins A2/B1	1.0125	1.0125	0.98111	1.027	1	1	1	2	0.0057477	138.83	39.451
MSTGTFVVSQPLNYR	Unmodified	1698.84	P49189	ALDH9A1	4-trimethylaminobutyraldehyde dehydrogenase	1.013	1.013	NaN	NaN	1			2	0.00092524	149.38	85.565
VLESTMVCVDNSEYMR	Unmodified	1931.84	Q5VWC4;P55036-2;P55036	PSMD4	26S proteasome non-ATPase regulatory subunit 4	1.0135	0.97625	1.0039	NaN	2	2		2;3	0.0065546	127.37	77.266
DEAAFLER	Unmodified	949.451	Q05682;C9J813;E9PGZ1;E7EX44;Q05682-5;Q05682-4;Q05682-3;Q05682-6;Q05682-2;C9JEK3	CALD1	Caldesmon	1.0137	1.1486	0.89474	NaN	1	1		2	0.062913	119.41	55.927
ASQSQGIQQLLQAEKR	Acetyl (N-term)	1825.96	F2Z307;O95670-2;O95670;O75348	ATP6V1G2-DDX39B;ATP6V1G2;ATP6V1G1	V-type proton ATPase subunit G 2;V-type proton ATPase subunit G 1	1.0143	1.0869	0.90706	1.4197	4	5	8	2;3	1.0772e-42	184.11	120.48
FLIPVQTQHPIR	Unmodified	1447.83	K7EQ48;A0A0A0MTS2;P06744;P06744-2;K7ESF4	GPI	Glucose-6-phosphate isomerase	1.0146	1.1521	1.0041	0.96836	1	1	4	3	0.0047984	133.91	53.206
AANATTNPSQLLPLELVDKCIGSR	Acetyl (N-term)	2609.35	B8ZZF8;Q9Y4Y9	LSM5	U6 snRNA-associated Sm-like protein LSm5	1.0163	0.62553	0.76587	1.0334	1	1	1	3	2.2591e-05	55.208	21.839
TTMYPGIADR	Unmodified	1123.53	P63261;P60709;A6NL76;P63267;P68032;P62736;P68133;P63267-2	ACTG1;ACTB;ACTA1;ACTG2;ACTC1;ACTA2	Actin, cytoplasmic 2;Actin, cytoplasmic 2, N-terminally processed;Actin, cytoplasmic 1;Actin, cytoplasmic 1, N-terminally processed;Actin, gamma-enteric smooth muscle;Actin, alpha cardiac muscle 1;Actin, aortic smooth muscle;Actin, alpha skeletal muscle	1.0165	1.0605	NaN	0.97441	1		1	2	9.733e-05	123.21	30.738
GQSETILGGLGLGLGGGDCR	Unmodified	1915.94	H7C5H7;H3BLU7;O43488	AKR7A2	Aflatoxin B1 aldehyde reductase member 2	1.0187	1.2587	NaN	0.82449	2	1	3	2	4.1334e-07	127.75	44.439
YYTTTPALVF	Unmodified	1174.59	D6RE02	MATR3		1.0198	0.90537	NaN	1.1487	1		1	2	0.032811	92.467	74.242
DILSVASVR	Unmodified	958.545	P14550	AKR1A1	Alcohol dehydrogenase [NADP(+)]	1.0207	1.0515	1.0207	0.99302	1	1	1	2	0.0058004	119.21	31.888
VYVNDAFGTAHR	Unmodified	1348.65	P00558-2;P00558;P07205	PGK1;PGK2	Phosphoglycerate kinase 1;Phosphoglycerate kinase 2	1.021	1.021	1.0666	0.9616	1	1	1	3	0.0020068	125.54	70.141
LSPALMDVPYR	Unmodified	1260.65	P35573-2;P35573-3;P35573	AGL	Glycogen debranching enzyme;4-alpha-glucanotransferase;Amylo-alpha-1,6-glucosidase	1.0211	NaN	1.0211	NaN		1		2	0.091533	81.296	8.0362
REDQSILCTGESGAGKTEN	Unmodified	2050.92	E7ERA5	MYH10		1.0214	1.0214	0.96168	0.79644	1	2	1	3	0.0010233	94.313	85.923
AIDQMWLPVVR	Oxidation (M)	1342.71	P18669;Q8N0Y7	PGAM1;PGAM4	Phosphoglycerate mutase 1;Probable phosphoglycerate mutase 4	1.0233	1.0891	0.96149	NaN	1	1		2	0.18462	70.056	31.753
LTGVFAPR	Unmodified	859.492	P62701;C9JEH7;Q8TD47;P22090	RPS4X;RPS4Y1;RPS4Y2	40S ribosomal protein S4, X isoform;40S ribosomal protein S4, Y isoform 2;40S ribosomal protein S4, Y isoform 1	1.0235	1.0098	1.0489	1.0235	1	1	1	2	0.1268	89.55	28.762
TEMKEEQKSNTAGSQSQVETEA	Unmodified	2411.08	Q02790	FKBP4	Peptidyl-prolyl cis-trans isomerase FKBP4;Peptidyl-prolyl cis-trans isomerase FKBP4, N-terminally processed	1.0248	NaN	NaN	1.0248			2	3	0.022441	59.9	46.308
SQQTNDYMQPEEDWDR	Unmodified	2040.81	P12814-2;P12814;P12814-3;P12814-4	ACTN1	Alpha-actinin-1	1.0249	1.0249	NaN	NaN	1		1	2	0.0181	92.856	55.243
GEVVSEATQQQHEVL	Unmodified	1652.8	P17661	DES	Desmin	1.0254	1.0254	1.0718	1.0381	2	2	2	2;3	0.00094456	135.66	75.56
GSVIDYELIDQDAR	Unmodified	1592.77	H0YMD0;H0YMU9;H0YM50;H0YN42;P07355;P07355-2;H0YN28;H0YL33;H0YNP5;H0YNA0	ANXA2	Annexin;Annexin A2	1.0255	1.0267	1.0646	0.98625	4	4	4	2;3	0	336.92	232.5
KGVVPLAGTNGETTTQGLDGLSER	Unmodified	2399.23	H3BMQ8;H3BUH7;H3BR04;H3BPS8;H3BQN4;J3KPS3;P04075;P04075-2;H3BU78	ALDOA	Fructose-bisphosphate aldolase;Fructose-bisphosphate aldolase A	1.0262	1.0159	1.0715	1.0393	3	3	4	3	7.8229e-10	98.3	76.701
SYGRPPPDVEGMTSLKVDNLTYR	Acetyl (N-term)	2636.29	J3QL05;J3KP15;Q01130-2;Q01130	SRSF2	Serine/arginine-rich splicing factor 2	1.0266	0.94089	1.0896	0.93883	2	1	2	3	3.3082e-52	76.533	23.992
GVQVETISPGDGR	Unmodified	1313.66	Q1JUQ3;A0A087WTS4;A0A087WV48;A0A087WZM5;P62942	FKBP12-Exin;FKBP1A	Peptidyl-prolyl cis-trans isomerase;Peptidyl-prolyl cis-trans isomerase FKBP1A	1.0289	1.0064	0.99707	1.0289	4	5	4	2;3	4.9473e-48	204.56	159.19
LEPTVIDEVR	Unmodified	1169.63	Q71U36-2;Q71U36;P68363;F5H5D3;Q9BQE3;F8VVB9;F8VQQ4;P68363-2;A0A1W2PQM2;F8VRK0;F8VX09;F8VWV9;F8VRZ4;F8VS66	TUBA1A;TUBA1B;TUBA1C	Tubulin alpha-1A chain;Tubulin alpha-1B chain;Tubulin alpha-1C chain	1.0293	0.9692	1.0932	0.89759	1	1	1	2	1.1221e-26	191.17	59.951
TLDSTAAQQELR	Unmodified	1331.67	P35579	MYH9	Myosin-9	1.0304	1.0576	1.0039	0.99576	1	1	1	2	0.0064528	110.38	48.419
GEVELVSGVVAR	Unmodified	1213.67	K7ESA3;Q99536-2;Q99536-3;Q99536	VAT1	Synaptic vesicle membrane protein VAT-1 homolog	1.0313	1.0313	NaN	NaN	1			2	0.12433	87.298	19.735
QVSGPPSAPAEDR	Unmodified	1309.63	Q92734-4;Q92734-3;Q92734-2;Q92734	TFG	Protein TFG	1.0317	0.99159	1.0317	1.067	1	1	1	2	0.009851	132.17	49.526
AVFPSIVGR	Unmodified	944.544	P63261;P60709;Q6S8J3;A6NL76;I3L3I0;I3L1U9;G5E9R0;C9JFL5;F6UVQ4;F6QUT6;E7EVS6;I3L3R2;J3KT65;Q9BYX7;A5A3E0;I3L4N8;P0CG38;C9JTX5;C9JUM1;C9JZR7;F8WB63;B8ZZJ2;K7EM38;F8WCH0;P63267;P68032;P62736;P68133;P63267-2	ACTG1;ACTB;POTEE;ACTA1;ACTG2;ACTA2;POTEKP;POTEF;POTEI;ACTC1	Actin, cytoplasmic 2;Actin, cytoplasmic 2, N-terminally processed;Actin, cytoplasmic 1;Actin, cytoplasmic 1, N-terminally processed;POTE ankyrin domain family member E;Putative beta-actin-like protein 3;Putative beta-actin-like protein 3, N-terminally processed;POTE ankyrin domain family member F;POTE ankyrin domain family member I;Actin, gamma-enteric smooth muscle;Actin, alpha cardiac muscle 1;…	1.0324	1.074	1.0324	0.89506	1	1	1	2	4.7095e-14	172.03	71.965
GQSDENKDDYTIPDEYR	Unmodified	2043.87	Q68E03;B3KM87;D6REM6;A0A0R4J2E8;A8MXP9;P43243-2;P43243	DKFZp686L22104;MATR3	Matrin-3	1.0333	0.90302	1.1823	NaN	1	1		3	0.021291	82.663	56.251
EVQSKIEKKYDEELEER	Unmodified	2151.07	Q01995;E9PJ32	TAGLN	Transgelin	1.0342	1.0342	NaN	NaN	1			3	0.08625	68.944	47.277
AGITTIEAVKR	Acetyl (N-term)	1199.69	D6R904;A0A087WWU8;Q5HYB6;P06753-4;P06753-3;P06753-6;P06753-5;P06753-2;D6RFM2;Q5VU61	TPM3;DKFZp686J1372		1.0372	0.89508	1.0505	0.97091	4	1	1	2	2.3415e-89	109.44	73.821
SIVVSPILIPENQR	Unmodified	1563.9	P55290-3;P55290-2;P55290;P55290-4	CDH13	Cadherin-13	1.0372	0.89103	1.0372	1.0843	1	1	1	2	0.0033469	134.2	73.798
SYQGKKNIPR	Acetyl (N-term)	1231.67	Q14195;D6RF19;Q16555	DPYSL3;DPYSL2	Dihydropyrimidinase-related protein 3;Dihydropyrimidinase-related protein 2	1.0396	1.0982	1.0955	0.99135	2	1	2	2;3	0.053793	81.95	38.3
DVSPFLEGLEER	Unmodified	1389.68	F5GX11;P25786;P25786-2	PSMA1	Proteasome subunit alpha type-1	1.0427	1.0226	NaN	1.0631	1		1	2	0.0056311	121.61	100.74
EVGGEALGR	Unmodified	886.451	P68871;F8W6P5;CON__Q3SX09;CON__P02070	HBB	Hemoglobin subunit beta;LVV-hemorphin-7;Spinorphin	1.0456	1.047	1.0609	1.0306	2	1	1	2	5.962e-142	247.94	86.044
GYLSLLQDSGEVR	Unmodified	1435.73	I3L397;I3L504;P63241;P63241-2	EIF5A	Eukaryotic translation initiation factor 5A;Eukaryotic translation initiation factor 5A-1	1.0486	1.0186	1.0486	1.0762	3	1	2	2;3	9.7503e-297	290.2	248.33
LDQASLAAVSQQLAPR	Unmodified	1666.9	Q9Y490	TLN1	Talin-1	1.0486	1.0486	NaN	NaN	1			3	0.0083465	103.6	63.858
GPAAEAEPEHSFDGLR	Unmodified	1681.77	Q15149-9;Q15149-7;Q15149-8;Q15149-5;Q15149-4;Q15149-6;Q15149-3;Q15149-2;Q15149	PLEC	Plectin	1.0497	1.0828	1.0735	0.78257	3	2	2	3	1.1904e-21	186.29	131.43
ATDELATKLSR	Acetyl (N-term)	1245.66	Q96C19	EFHD2	EF-hand domain-containing protein D2	1.0529	1.0316	1.0661	1.0529	1	1	1	2	8.1589e-18	104.42	69.155
KVVGKDYLLCDYNR	Unmodified	1741.88	B1AK85;B1AK88;P47756-2;P47756;B1AK87	CAPZB	F-actin-capping protein subunit beta	1.0543	1.0543	NaN	NaN	1			3	0.074024	83.243	56.808
GYGGGPGGGNFGGSPGYGGGR	Unmodified	1783.77	P22626;P22626-2	HNRNPA2B1	Heterogeneous nuclear ribonucleoproteins A2/B1	1.0552	1.0552	NaN	NaN	1			2	5.3095e-08	137.46	123.79
SVGCLETAEEVKR	Unmodified	1476.72	P35579	MYH9	Myosin-9	1.0555	1.0306	1.2017	1.0809	1	2	1	3	6.6978e-76	221.8	101.74
ALTSFLPAPTQLSQDQLEAEEKAR	Acetyl (N-term)	2684.37	G3V5R3;G3V3A4;Q13573	SNW1	SNW domain-containing protein 1	1.0577	1.0577	1.0737	0.95189	1	1	1	3	2.889e-09	63.726	41.026
EDSATETCYTYDR	Unmodified	1609.62	D6RHJ6;D6RD17;P01591	JCHAIN;IGJ	Immunoglobulin J chain	1.061	1.061	0.98874	1.0675	1	1	1	2	7.3286e-07	169.52	130.71
ENGHGEQQPQPPATQQQQPQQQR	Unmodified	2638.22	A0A1W2PP35;A0A1X7SBS1;A0A1W2PPS1;Q00839-2;Q00839;A0A1W2PP22	HNRNPU	Heterogeneous nuclear ribonucleoprotein U	1.0612	NaN	1.0612	NaN	1	3	1	3	7.0506e-16	128.4	86.333
LEAEHVEVEDTTLNR	Unmodified	1753.85	H3BV85;H3BTW0;A0A0B4J295;A0A087WZT3;H3BVE0;Q9H3K6-2;Q9H3K6	BOLA2B;BOLA2	BolA-like protein 2	1.0623	1.0623	NaN	NaN	1			3	0.084339	82.908	32.345
AVSELAGHQTSAESWGTGR	Unmodified	1942.91	H3BTP7;H3BU31;P36578	RPL4	60S ribosomal protein L4	1.065	1.0926	0.82563	1.065	1	1	1	3	0.0081288	91.065	50.341
WTGEDSAEPNSDSAEWIR	Unmodified	2048.87	M0R1V4;P08294	SOD3	Extracellular superoxide dismutase [Cu-Zn]	1.0659	NaN	0.88159	1.1193		2	1	2	0.0028301	92.906	60.047
GSEADIDEGLYSR	Unmodified	1410.63	P22314-2;P22314;Q5JRR9;Q5JRS0;Q5JRS1;Q5JRS3;Q5JRS2	UBA1	Ubiquitin-like modifier-activating enzyme 1	1.0671	1.0671	1.1136	1.0246	1	1	1	2	0.0011894	155.26	96.829
KLHVDPENFR	Unmodified	1253.65	E9PFT6;P02042;P68871;CON__Q3SX09	HBD;HBB	Hemoglobin subunit delta;Hemoglobin subunit beta;LVV-hemorphin-7;Spinorphin	1.0673	1.0617	1.0673	1.1214	2	1	2	2;3	5.0622e-07	143.24	115.81
SYLILETLPTEYDSR	Unmodified	1798.9	E9PLG2;E9PN50;E9PMD8;E9PKD5;E9PM69;R4GNH3;P17980	PSMC3	26S protease regulatory subunit 6A	1.0677	1.0406	1.0142	1.3533	2	1	2	2	0.0094228	108.37	66.371
SEGDSVGESVHGKPSVVYR	Unmodified	1987.96	Q5T093;Q5T092;A0A0A0MR06;Q5T091;O15258	RER1	Protein RER1	1.0691	NaN	1.1271	1.014		1	1	4	0.038706	67.846	63.497
YLMKILTER	Unmodified	1165.65	P63261;P60709;Q6S8J3;I3L3I0;I3L1U9;Q9BYX7;I3L4N8;P0CG38;P0CG39;Q562R1;P63267;P68032;P62736;P68133;P63267-2	ACTG1;ACTB;POTEE;POTEKP;POTEI;POTEJ;ACTBL2;ACTG2;ACTC1;ACTA2;ACTA1	Actin, cytoplasmic 2;Actin, cytoplasmic 2, N-terminally processed;Actin, cytoplasmic 1;Actin, cytoplasmic 1, N-terminally processed;POTE ankyrin domain family member E;Putative beta-actin-like protein 3;Putative beta-actin-like protein 3, N-terminally processed;POTE ankyrin domain family member I;POTE ankyrin domain family member J;Beta-actin-like protein 2;Actin, gamma-enteric smooth muscle;Acti…	1.0703	0.67775	NaN	1.6901	1		1	3	0.012566	106.18	16.292
LKVELSQLR	Unmodified	1084.66	F2Z388;P42766	RPL35	60S ribosomal protein L35	1.0704	1.0704	NaN	NaN	1			3	0.0093571	111.46	55.096
QINTDLNLER	Unmodified	1214.63	P35579;P35579-2	MYH9	Myosin-9	1.0709	1.0709	0.96608	1.2138	1	1	1	2	6.9694e-08	145.25	57.608
VKELVLDNSR	Unmodified	1171.66	P39687;H0YN26;H7BZ09	ANP32A	Acidic leucine-rich nuclear phosphoprotein 32 family member A	1.0717	1.0717	NaN	NaN	1			3	0.20017	70.728	23.501
YNASVSVPDSSGPER	Unmodified	1563.72	P61978-3;P61978;P61978-2;Q5T6W2	HNRNPK	Heterogeneous nuclear ribonucleoprotein K	1.0741	1.0741	1.0041	0.91843	1	1	1	2	3.836e-07	169.65	128.11
SPALTIENEHIR	Unmodified	1378.72	O00754-2;O00754	MAN2B1	Lysosomal alpha-mannosidase;Lysosomal alpha-mannosidase A peptide;Lysosomal alpha-mannosidase B peptide;Lysosomal alpha-mannosidase C peptide;Lysosomal alpha-mannosidase D peptide;Lysosomal alpha-mannosidase E peptide	1.0754	1.0435	1.0998	1.1083	1	2	1	3	0.0062208	110.93	50.852
QVLITEHGDLGNSR	Unmodified	1537.78	P52907	CAPZA1	F-actin-capping protein subunit alpha-1	1.0756	1.0692	NaN	1.082	1		1	3	0.0071197	105.19	53.253
AAKNQVAMNPTNTVFDAKR	Unmodified	2075.06	E9PKE3;P11142;P11142-2;E9PNE6;E9PQQ4;E9PQK7;E9PK54;E9PLF4;E9PN25;E9PPY6	HSPA8	Heat shock cognate 71 kDa protein	1.0768	1.0768	1.0761	0.73721	3	2	2	3;4	7.7065e-06	135.09	102.17
ANVLTNELR	Unmodified	1028.56	H0YLS6;H0YLC2;H0YKT8;H0YMA1;H0YMZ1;H0YL69;P25789;H0YN18;P25789-2	PSMA4	Proteasome subunit alpha type;Proteasome subunit beta type;Proteasome subunit alpha type-4	1.0779	1.0915	1.0644	NaN	1	1		2	0.14261	80.438	7.1899
TSAAVTEEMPPLEGDDDTSR	Unmodified	2119.92	P07900;P07900-2;Q58FG1	HSP90AA1;HSP90AA4P	Heat shock protein HSP 90-alpha;Putative heat shock protein HSP 90-alpha A4	1.0806	1.1064	1.0442	1.1355	4	2	2	2;3	3.1342e-16	171.11	141
GTVSWGLEDDEDMTLTR	Unmodified	1923.85	Q13404-8;Q13404;E5RIF1;D6RG00;I3L0A0;Q13404-7;Q13404-2;Q13404-1;H0YBX6;Q15819	UBE2V1;UBE2V2;TMEM189-UBE2V1	Ubiquitin-conjugating enzyme E2 variant 1;Ubiquitin-conjugating enzyme E2 variant 2	1.0821	1.0821	NaN	NaN	3	1		2	0.0032371	120.59	52.709
EKTDTLEDLFPTTKIPNPR	Unmodified	2214.15	P13010	XRCC5	X-ray repair cross-complementing protein 5	1.0825	0.90302	1.2431	0.94258	1	1	1	4	0.076558	62.438	59.795
VPKWISIMTER	Unmodified	1358.74	H0YMD0;H0YMU9;H0YM50;H0YN42;P07355;P07355-2;H0YN28;H0YL33;H0YNP5;A6NMY6	ANXA2;ANXA2P2	Annexin;Annexin A2;Putative annexin A2-like protein	1.0826	1.0826	1.3081	1.0089	2	2	2	3	0.13778	75.566	29.658
ADNEKLDNQR	Acetyl (N-term)	1243.58	O00629	KPNA4	Importin subunit alpha-3	1.0834	1.1118	NaN	1.0558	1		1	2	0.014378	93.162	32.334
HALLEEQSKQQSNEHLR	Unmodified	2046.02	O43707;F5GXS2;O43707-3;O43707-2;H7C144	ACTN4	Alpha-actinin-4	1.0834	0.77902	1.5068	NaN	1	1		4	0.040161	77.776	51.953
GKVKVGVNGFGR	Unmodified	1216.7	P04406	GAPDH	Glyceraldehyde-3-phosphate dehydrogenase	1.0849	1.0849	1.0768	0.98354	1	1	1	3	0.00048704	141.08	91.666
AKNGSEADIDEGLYSR	Acetyl (N-term)	1765.81	P22314-2;P22314;Q5JRR9;Q5JRS0;Q5JRS1;Q5JRS3;Q5JRS2	UBA1	Ubiquitin-like modifier-activating enzyme 1	1.0872	0.72758	1.0339	1.1432	2	1	2	2;3	0.0084554	52.344	9.7884
MKSVTEQGAELSNEER	Unmodified	1806.84	E7EX29;P63104;E5RGE1;E5RIR4;E9PD24;E7EVZ2;E7ESK7	YWHAZ	14-3-3 protein zeta/delta	1.0882	1.0882	NaN	NaN	1			3	0.043811	82.349	0
AALGYDYKGETEKHESQR	Unmodified	2080.98	P14317	HCLS1	Hematopoietic lineage cell-specific protein	1.0884	1.0273	1.0884	1.1023	1	1	1	5	0.12748	62.237	31.821
DGTGQLLLPLSDAR	Unmodified	1454.77	Q15149-9;Q15149-7;Q15149-8;Q15149-5;Q15149-4;Q15149-6;Q15149-3;Q15149-2;Q15149	PLEC	Plectin	1.0887	1.0887	0.98624	1.206	1	1	1	2	0.092446	80.014	69.185
SKSESPKEPEQLR	Acetyl (N-term)	1555.78	F8W6I7;P09651-3;P09651-2;P09651;F8VTQ5;F8W646	HNRNPA1	Heterogeneous nuclear ribonucleoprotein A1;Heterogeneous nuclear ribonucleoprotein A1, N-terminally processed	1.0892	1.1079	0.87311	1.0929	4	4	5	2;3	3.4513e-36	82.029	23.436
IISDTSGDFR	Unmodified	1109.54	H0YMD0;H0YMU9;H0YM50;H0YN42;P07355;P07355-2;H0YN28;H0YL33;H0YNP5;H0YNA0;H0YKS4;A6NMY6;H0YN52	ANXA2;ANXA2P2	Annexin;Annexin A2;Putative annexin A2-like protein	1.09	1.2568	0.94538	0.9015	1	1	1	2	0.010022	108.46	39.263
ALEKLMFEELR	Unmodified	1377.73	Q9Y3I0	RTCB	tRNA-splicing ligase RtcB homolog	1.0901	NaN	NaN	1.0901			1	3	0.053081	89.403	44.288
AIDQMWLPVVR	Unmodified	1326.71	P18669;Q8N0Y7	PGAM1;PGAM4	Phosphoglycerate mutase 1;Probable phosphoglycerate mutase 4	1.0906	1.0428	1.0906	1.0929	1	1	1	2	0.0017087	113.18	74.422
MEVKPPPGR	Acetyl (N-term)	1051.55	P51991	HNRNPA3	Heterogeneous nuclear ribonucleoprotein A3	1.0911	1.0244	1.1023	1.0911	1	1	1	2	0.0063199	77.058	57.421
GHTFNYQTR	Unmodified	1122.52	F5H6X6;E9PKU7;Q14697;Q14697-2	GANAB	Neutral alpha-glucosidase AB	1.0919	1.0919	1.0354	1.3294	1	1	1	3	0.044092	94.409	52.983
DTVCLAKLHDR	Unmodified	1326.67	P02787	TF	Serotransferrin	1.0937	1.8578	1.0176	1.1756	2	1	1	3	0.034593	92.611	48.302
SSSLEKSYELPDGQVITIGNER	Unmodified	2421.2	P63261;P60709;Q6S8J3;A5A3E0;P63267;P68032;P62736;P68133;P63267-2	ACTG1;ACTB;POTEE;POTEF;ACTG2;ACTC1;ACTA2;ACTA1	Actin, cytoplasmic 2;Actin, cytoplasmic 2, N-terminally processed;Actin, cytoplasmic 1;Actin, cytoplasmic 1, N-terminally processed;POTE ankyrin domain family member E;POTE ankyrin domain family member F;Actin, gamma-enteric smooth muscle;Actin, alpha cardiac muscle 1;Actin, aortic smooth muscle;Actin, alpha skeletal muscle	1.0943	1.0777	1.1886	NaN	3	2	1	3	4.6921e-07	97.776	60.693
DVVGDTSGYYQR	Unmodified	1358.61	P08758;E9PHT9;D6RBE9;D6RBL5	ANXA5	Annexin A5;Annexin	1.0949	1.108	1.0949	0.94844	1	1	1	2	0.069801	83.883	56.768
SLEKSYELPDGQVITIGNER	Unmodified	2247.14	P63261;P60709;Q6S8J3;A5A3E0;P63267;P68032;P62736;P68133;P63267-2	ACTG1;ACTB;POTEE;POTEF;ACTG2;ACTC1;ACTA2;ACTA1	Actin, cytoplasmic 2;Actin, cytoplasmic 2, N-terminally processed;Actin, cytoplasmic 1;Actin, cytoplasmic 1, N-terminally processed;POTE ankyrin domain family member E;POTE ankyrin domain family member F;Actin, gamma-enteric smooth muscle;Actin, alpha cardiac muscle 1;Actin, aortic smooth muscle;Actin, alpha skeletal muscle	1.0957	0.92852	1.2726	1.1172	2	2	2	3	0.010139	72.09	32.18
GEFSMDLR	Unmodified	953.428	P07737;K7EJ44	PFN1	Profilin-1	1.0967	1.0584	1.0967	1.1574	1	1	1	2	6.4237e-89	231.97	167.17
SCDELIPEYLNFIR	Unmodified	1767.85	P08238	HSP90AB1	Heat shock protein HSP 90-beta	1.0967	1.5395	NaN	0.78124	1		1	2	0.0094771	112.13	105.47
SHTILLVQPTKRPEGR	Acetyl (N-term)	1873.05	P84090;G3V279	ERH	Enhancer of rudimentary homolog	1.0973	1.1288	1.0808	1.1104	2	2	3	3;4	0.0036039	75.589	43.337
FSALESQLQDTQELLQEENR	Unmodified	2377.14	P35579	MYH9	Myosin-9	1.0974	1.0777	1.0974	1.3351	1	1	1	3	7.1864e-08	132.67	110.68
GVLLAAER	Unmodified	827.486	H0YLS6;H0YLC2;H0YKT8;H0YMA1;H0YMZ1;H0YL69;P25789;H0YMI6	PSMA4	Proteasome subunit alpha type;Proteasome subunit beta type;Proteasome subunit alpha type-4	1.0993	1.1842	1.0205	NaN	1	1		2	0.060058	124.34	49.904
IPKMLDAEDIVGTAR	Unmodified	1627.86	P12814-2;P12814;P12814-3;P12814-4;H9KV75;G3V2W4;G3V2N5	ACTN1	Alpha-actinin-1	1.1005	1.0193	1.1881	NaN	1	1		3	0.12007	69.485	30.716
ALNIETAIK	Unmodified	971.565	H0YNB8	ANXA2		1.104	1.2305	0.99048	0.98699	1	1	1	2	0.026517	97.635	20.861
AGLQFPVGR	Unmodified	943.524	Q93077;Q7L7L0;P04908;A0A0U1RR32;A0A0U1RRH7;Q99878;Q96KK5;Q9BTM1;Q16777;Q8IUE6;Q6FI13;P20671;P0C0S8;P16104;Q9BTM1-2;C9J0D1;Q71UI9-5;Q71UI9-2;Q71UI9;P0C0S5;Q96QV6	HIST1H2AC;HIST3H2A;HIST1H2AB;HIST1H2AJ;HIST1H2AH;H2AFJ;HIST2H2AC;HIST2H2AB;HIST2H2AA3;HIST1H2AD;HIST1H2AG;H2AFX;H2AFV;H2AFZ;HIST1H2AA	Histone H2A type 1-C;Histone H2A type 3;Histone H2A type 1-B/E;Histone H2A type 1-J;Histone H2A type 1-H;Histone H2A.J;Histone H2A type 2-C;Histone H2A type 2-B;Histone H2A type 2-A;Histone H2A type 1-D;Histone H2A type 1;Histone H2AX;Histone H2A;Histone H2A.V;Histone H2A.Z;Histone H2A type 1-A	1.105	1.084	1.1272	1.105	1	1	1	2	1.7954e-05	143.02	78.262
GPEQMELEEGKAGSGLR	Unmodified	1786.85	J3KTQ9;J3QSE0;J3QQM1;P62195	PSMC5	26S protease regulatory subunit 8	1.105	NaN	1.1377	1.0732		1	1	3	0.084423	69.069	64.452
DLLECADDR	Unmodified	1105.47	A0A0C4DGB6;CON__P02768-1;P02768;B7WNR0;C9JKR2;H0YA55;D6RHD5;P02768-2;CON__P02769	ALB	Serum albumin	1.1053	1.1083	1.0372	0.95744	1	1	1	2	0.0069169	116.37	26.619	+
GIFDDNFIEER	Unmodified	1353.62	O60493-2;O60493-4;O60493	SNX3	Sorting nexin-3	1.107	1.0928	1.107	1.2391	1	1	1	2	0.00054326	153.05	85.148
AGAPTVSLPELR	Unmodified	1209.67	Q8NFU3-3;Q8NFU3	TSTD1	Thiosulfate sulfurtransferase/rhodanese-like domain-containing protein 1	1.1072	2.5361	NaN	0.48337	1		1	2	0.029159	108.67	60.384
MEKVPGEMEIER	Acetyl (N-term)	1488.7	K7EMC7;Q8WWM9	CYGB	Cytoglobin	1.1116	1.1116	1.1673	1.0074	1	1	1	2	0.0050677	75.566	39.248
ALVQVYPDGIR	Unmodified	1229.68	Q15393	SF3B3	Splicing factor 3B subunit 3	1.1118	1.1872	1.0412	NaN	1	1		2	0.036378	91.867	41.826
YSNIEANESEEVR	Unmodified	1538.68	U3KQE2;K7EM73;K7EIV0;A0A075B7C0;K7ELJ7;A0A0C4DGQ5;P04632	CAPNS1	Calpain small subunit 1	1.1119	1.1119	NaN	NaN	1			2	0.0083463	117.25	80.186
SPGHVDFSSEVTAALR	Unmodified	1671.82	P13639	EEF2	Elongation factor 2	1.1124	1.4012	0.88314	NaN	1	1		3	0.053909	81.651	38.15
MPEDSDTYLHR	Unmodified	1362.59	H0Y400;A0A0G2JJZ9;O00148;Q13838;Q13838-2;A0A140T9X3;Q5STU3	DDX39B;DDX39A	ATP-dependent RNA helicase DDX39A;Spliceosome RNA helicase DDX39B	1.1189	1.0365	1.2	1.1189	2	1	2	3	5.7483e-05	102.52	60.188
GKTLGECGFTSQTAR	Unmodified	1611.77	B8ZZU8;I3L0M9;Q15370;Q15370-2	TCEB2	Transcription elongation factor B polypeptide 2	1.1192	1.1175	1.1209	NaN	1	1		3	0.19962	65.467	45.789
LLSSVDQPLKIAR	Unmodified	1438.85	B1AK85;B1AK88;P47756-2;P47756;B1AK87	CAPZB	F-actin-capping protein subunit beta	1.1195	NaN	0.89178	1.4054	1	1	1	3	0.0092157	99.539	69.056
DVLLEACCADGHR	Unmodified	1514.66	B1AHN3;B1AHM9;B1AHL2;P23142-2;P23142-3;P23142-4;P23142	FBLN1	Fibulin-1	1.1204	0.84928	1.1204	1.2721	1	2	1	3	0.0098481	98.942	83.78
TEQQSPTSGGGKVAPAQPSEEGPGR	Unmodified	2451.16	E7EX17;P23588-2;P23588	EIF4B	Eukaryotic translation initiation factor 4B	1.1227	1.1227	NaN	NaN	1			3	6.039e-14	101.5	54.103
LSQTQGPPDYPR	Unmodified	1357.66	E9PI78;E9PNF1;Q13405	MRPL49	39S ribosomal protein L49, mitochondrial	1.123	NaN	1.123	NaN		1		2	0.12933	86.189	37.587
DSFSEAHSEFLKAASNLR	Unmodified	2007.96	P30101	PDIA3	Protein disulfide-isomerase A3	1.1239	1.1239	NaN	NaN	1			4	0.17866	59.345	24.391
GALSGHLGEVLIR	Unmodified	1320.75	P62306	SNRPF	Small nuclear ribonucleoprotein F	1.1244	1.1244	NaN	NaN	1			3	0.015907	128.36	94.602
EVIQNCPIDVR	Unmodified	1341.67	A0A0A0MTI9;H7C4J1;B4DXW1;Q9C0K3-2;Q9C0K3;Q9P1U1-2;Q9P1U1-3;Q9P1U1;P61158	ACTR3C;ACTR3;ACTR3B	Actin-related protein 3C;Actin-related protein 3B;Actin-related protein 3	1.1246	1.15	1.0674	1.1246	1	1	1	2	0.0088189	106.4	33.756
KMPPYDEQTQAFIDAAQEAR	Unmodified	2308.08	K7ELL7;P14314-2;P14314;A0A0C4DGP4	PRKCSH	Glucosidase 2 subunit beta	1.1247	1.7915	1.0761	1.012	4	2	2	3	8.7265e-10	137.05	94.41
NQELLSPSKRSLKRGLPR	Acetyl (N-term)	2120.22	Q7Z2Z1-2;Q7Z2Z1	TICRR	Treslin	1.1292	1.1292	NaN	NaN	1			3	0.016925	85.176	43.646
GTDEYNSGVICENTCKEKGR	Unmodified	2316.01	K7ELL7;P14314-2;P14314;K7EKX1;K7EJ70;K7EPW7	PRKCSH	Glucosidase 2 subunit beta	1.131	1.131	NaN	NaN	1			4	0.019639	67.252	50.221
DLLVDLDHQR	Unmodified	1222.63	P35579;P35579-2	MYH9	Myosin-9	1.1319	1.2705	0.89973	1.3262	4	3	1	2;3	2.0661e-11	156.83	107.41
AEFSSEACR	Unmodified	1055.43	A0A087WXL0;A0A0B4J1T0;A8MZD0;A0A087X1G7;A0A0B4J1S4;O60613-2;O60613	2019-09-15	15 kDa selenoprotein	1.1323	1.1278	1.1685	1.1323	1	1	1	2	0.0069172	116.37	43.582
GAPAPVSGEKDVVFLLDGSEGVR	Unmodified	2298.19	E7ENL6;P12111-4;P12111-2;P12111;P12111-3;P12111-5	COL6A3	Collagen alpha-3(VI) chain	1.1338	1.2582	1.09	1.0846	2	2	2	3	5.6134e-08	91.64	68.425
IVPTMHYQDSLPRTLV	Unmodified	1868.98	A0A1B0GTL9			1.1342	NaN	NaN	1.1342			1	2	0.084839	75.416	20.632
QELQSANASVDDSR	Unmodified	1518.69	P22314-2;P22314;Q5JRR6	UBA1	Ubiquitin-like modifier-activating enzyme 1	1.1345	NaN	1.1345	NaN		1	1	2	0.012999	132.56	64.634
SLSSSLQAPVVSTVGMQR	Oxidation (M)	1861.96	CON__P35900;P35900	KRT20	Keratin, type I cytoskeletal 20	1.1347	NaN	0.67228	0.74043	1	2	2	2;3	3.636e-09	145.17	67.779	+
ALDGPEQMELEEGKAGSGLR	Acetyl (N-term)	2128.01	J3KTQ9;J3QSE0;J3QQM1;P62195	PSMC5	26S protease regulatory subunit 8	1.1356	1.1356	1.0989	1.2018	3	1	1	2;3	2.339e-06	119.87	77.771
METEQPEETFPNTETNGEFGKR	Acetyl (N-term)	2612.13	P61978-3;P61978;P61978-2;Q5T6W2;S4R457	HNRNPK	Heterogeneous nuclear ribonucleoprotein K	1.1375	1.1449	1.1473	0.65316	6	2	2	2;3	1.6202e-08	129.89	89.462
LVFPSEIVGKR	Unmodified	1243.73	B5MCP9;P62081	RPS7	40S ribosomal protein S7	1.138	1.1186	1.1577	NaN	2	1		3	0.0027966	112.13	27.515
GTLGLTPPTTER	Unmodified	1241.66	Q15233;Q15233-2	NONO	Non-POU domain-containing octamer-binding protein	1.1409	1.1386	1.1409	1.1934	1	1	1	2	1.2085e-17	185.6	70.63
ASKEMFEDTVEER	Acetyl (N-term)	1611.71	E9PC52;Q16576	RBBP7	Histone-binding protein RBBP7	1.1412	1.1358	1.1466	0.78688	2	2	2	2	1.8815e-25	80.014	46.144
GIFEVKSTAGDTHLGGEDFDNR	Unmodified	2364.1	E9PKE3;P11142;P11142-2;E9PN89	HSPA8	Heat shock cognate 71 kDa protein	1.1419	1.1419	NaN	NaN	1			3	0.00029681	83.065	65.769
GPEAQAEACSGER	Unmodified	1360.57	J3QSY4;D6RC52;D6RCB9;Q9NX24	NHP2	H/ACA ribonucleoprotein complex subunit 2	1.1421	1.0203	1.1421	1.4098	1	1	2	2	4.4102e-11	175.74	126.32
SATETCYTYDR	Unmodified	1365.55	D6RHJ6;D6RD17;P01591	JCHAIN;IGJ	Immunoglobulin J chain	1.1429	1.1202	1.085	1.1432	1	1	1	2	6.0377e-220	275	209.69
EDLEELEVLER	Unmodified	1372.67	Q9NQC3-2;Q9NQC3-5;Q9NQC3;F8W914;Q9NQC3-4	RTN4	Reticulon-4;Reticulon	1.1451	1.0362	NaN	1.2653	1		1	2	0.022972	97.456	61.945
TLEDLFPTTKIPNPR	Unmodified	1740.94	P13010	XRCC5	X-ray repair cross-complementing protein 5	1.1521	1.0696	1.1521	0.95808	1	1	1	3	0.008564	103.76	82.095
SIHSVAPENEGR	Unmodified	1294.63	Q9BTV4	TMEM43	Transmembrane protein 43	1.1536	1.1536	1.045	1.2345	1	1	1	3	0.0083551	93.839	67.794
ATGANATPLDFPSKKR	Acetyl (N-term)	1714.9	F8WEV5;Q15637-4;Q15637-6;Q15637-3;Q15637-2;Q15637	SF1	Splicing factor 1	1.1567	1.6773	1.1555	1.1567	1	1	1	3	0.034338	46.926	14.774
DEPPQSPWDR	Unmodified	1225.54	P02647	APOA1	Apolipoprotein A-I;Proapolipoprotein A-I;Truncated apolipoprotein A-I	1.1577	1.1037	1.1577	1.2235	1	1	3	2	5.8147e-08	146.23	80.979
AAAAECDVVMAATEPELLDDQEAKR	Acetyl (N-term)	2744.26	K7ELJ8;K7ESP1;Q99615	DNAJC7	DnaJ homolog subfamily C member 7	1.1587	1.2146	1.1054	NaN	1	1	1	3	6.7119e-14	87.062	80.558
AEDVDLNHYR	Unmodified	1230.56	H7C118;B5MBZ8;C9JD73;C9J177;H7C003;Q15435-5;Q15435-4;Q15435-3;Q15435-2;Q15435	PPP1R7	Protein phosphatase 1 regulatory subunit 7	1.1589	1.1589	0.98616	1.2068	1	1	1	3	0.027648	94.409	55.659
AMDAMDGAVLDGR	Unmodified	1320.58	J3QL05;J3KP15;Q01130-2;Q01130	SRSF2	Serine/arginine-rich splicing factor 2	1.1589	1.0887	1.1589	1.2084	1	1	1	2	0.074625	82.261	38.491
GLAEDIDKGEVSAR	Unmodified	1458.73	P13639	EEF2	Elongation factor 2	1.1602	1.699	1.125	1.1152	2	2	3	2	8.9227e-07	156.36	79.171
GDDDAEEMEAKAED	Unmodified	1523.56	P05198	EIF2S1	Eukaryotic translation initiation factor 2 subunit 1	1.1616	1.1616	NaN	NaN	1			2	0.042403	96.103	96.103
NFTLIPEGTNGTEER	Unmodified	1676.8	Q16555;A0A1C7CYX9;Q16555-2	DPYSL2	Dihydropyrimidinase-related protein 2	1.1624	NaN	1.6635	0.81225		1	1	2	0.0097017	97.911	18.218
ESGEDVEVPYVR	Unmodified	1377.64	P22314-2;P22314;Q5JRR6	UBA1	Ubiquitin-like modifier-activating enzyme 1	1.1626	NaN	1.1626	NaN		1		2	0.12932	73.887	37.505
DMAAAMKNVTELNEPLSNEER	Unmodified	2361.09	P61981	YWHAG	14-3-3 protein gamma;14-3-3 protein gamma, N-terminally processed	1.1629	1.2786	1.1087	1.3291	2	1	2	3	4.6625e-13	139.02	89.553
SSLVFIPAEFR	Unmodified	1264.68	E7ENL6;P12111-4;P12111-2;P12111;P12111-3;P12111-5;C9JNG9	COL6A3	Collagen alpha-3(VI) chain	1.1641	NaN	1.1813	1.1471		1	1	2	0.11695	78.098	58.108
YLQGSGETPQTDVR	Unmodified	1549.74	F5H6X6;E9PKU7;Q14697;Q14697-2	GANAB	Neutral alpha-glucosidase AB	1.1641	1.1463	1.5889	1.0345	1	2	1	2	0.0075029	117.86	76.32
VGSLNLEELSEMR	Unmodified	1475.73	F8VWQ2;F8W0R2;F8W1N0;F8VZI7;F8W1V2;B4E321;Q13438-8;Q13438-6;Q13438-5;Q13438-3;Q13438-2;Q13438-7;Q13438-4;Q13438	OS9	Protein OS-9	1.1652	1.0948	1.2402	NaN	1	1		2	0.026176	92.925	31.572
SLADAINTEFKNTR	Unmodified	1578.8	P08670;B0YJC4;A0A1B0GTT5;A0A1B0GVG8	VIM	Vimentin	1.1656	1.2476	1.0772	1.1341	4	6	6	2;3	2.1529e-62	210.91	147.43
VLLQVDDER	Unmodified	1085.57	P35579;P35579-2	MYH9	Myosin-9	1.1656	1.1998	1.0521	1.017	1	1	1	2	0.014289	104.06	29.756
AEGESDLENSR	Unmodified	1205.52	Q9Y490	TLN1	Talin-1	1.1665	1.0424	1.0854	1.2202	2	1	2	2	0.00021547	140.17	84.639
LEVAQTTALPDEDDDL	Unmodified	1743.81	B4DV51;B5MDF5;J3KQE5;P62826	RAN	GTP-binding nuclear protein Ran	1.1685	1.1543	1.1828	NaN	1	1		2	0.042831	82.505	48.24
AATTGSGVKVPR	Acetyl (N-term)	1184.65	Q13404-8;Q13404	UBE2V1	Ubiquitin-conjugating enzyme E2 variant 1	1.171	1.1658	NaN	1.1763	1		1	2	0.0052045	74.165	45.956
AGMAMAGQSPVLR	Unmodified	1287.64	K7EKJ7;A0A0U1RRM4;P26599;P26599-2;P26599-3;A0A087WU68;A6NLN1	PTBP1	Polypyrimidine tract-binding protein 1	1.1713	1.1713	NaN	NaN	1			2	0.059374	86.014	45.29
GYEFKFPNR	Unmodified	1156.57	P09382	LGALS1	Galectin-1	1.1721	1.1349	1.1372	1.2081	3	1	2	3	0.0010717	134.81	68.541
QMWLPVVR	Unmodified	1027.56	P18669;Q8N0Y7;P15259	PGAM1;PGAM4;PGAM2	Phosphoglycerate mutase 1;Probable phosphoglycerate mutase 4;Phosphoglycerate mutase 2	1.1736	1.2446	1.1068	NaN	1	1		2	0.040727	106.42	66.414
SIGETPTPGASKR	Unmodified	1299.68	O75533	SF3B1	Splicing factor 3B subunit 1	1.1736	1.1503	1.1869	1.1736	1	1	1	3	0.0085882	138.24	103.23
AVVGVVAGGGR	Unmodified	940.545	E9PKZ0;E9PKU4;P62917;E9PP36	RPL8	60S ribosomal protein L8	1.1738	NaN	1.2802	1.0763		1	1	2	0.082347	82.452	45.432
IWLEAGKALDYYMLR	Unmodified	1840.95	Q9Y490	TLN1	Talin-1	1.1739	1.1739	NaN	NaN	1			2	0.17694	66.595	38.629
GVPGGPGETGKNGGFGR	Unmodified	1542.75	E7ENL6;P12111-4;P12111-2;P12111	COL6A3	Collagen alpha-3(VI) chain	1.174	NaN	NaN	1.174			1	3	0.045935	76.391	38.797
TTLEHSDCAFMVDNEAIYDICR	Unmodified	2659.14	Q71U36-2;Q71U36;P68363;F5H5D3;Q9BQE3;F8VVB9;F8VQQ4;Q6PEY2;Q13748;Q13748-2;C9J2C0;Q9NY65-2;Q9NY65;C9JDS9;P68366-2;P68366	TUBA1A;TUBA1B;TUBA1C;TUBA3E;TUBA3C;TUBA8;TUBA4A	Tubulin alpha-1A chain;Tubulin alpha-1B chain;Tubulin alpha-1C chain;Tubulin alpha-3E chain;Tubulin alpha-3C/D chain;Tubulin alpha-8 chain;Tubulin alpha-4A chain	1.1749	1.1749	NaN	NaN	2			3	9.1712e-07	113.51	93.451
GPSQMALEDLAMFR	Oxidation (M)	1580.73	P29401;P29401-2;A0A0B4J1R6	TKT	Transketolase	1.1752	1.1747	1.1112	1.1757	1	2	1	2	0.028972	90.434	44.669
VPPPPMEPDHPFYSNISKDR	Unmodified	2322.11	P18669;Q8N0Y7	PGAM1;PGAM4	Phosphoglycerate mutase 1;Probable phosphoglycerate mutase 4	1.1768	1.1768	NaN	NaN	1			4	0.04193	61.815	27.943
EEATGTIQEDYLR	Unmodified	1523.71	J3QRS3;P19105;O14950	MYL12A;MYL12B	Myosin regulatory light chain 12A;Myosin regulatory light chain 12B	1.1784	0.98304	1.1784	1.3493	1	1	1	2	0.0081534	119.74	73.615
TCPEVGFFDVLGNDR	Unmodified	1724.78	Q9H3P7	ACBD3	Golgi resident protein GCP60	1.1804	NaN	1.1804	NaN		1		2	0.012041	113.07	66.662
KLNVITVGPR	Unmodified	1095.68	P04040	CAT	Catalase	1.1818	0.67664	1.1818	1.7832	1	1	1	3	0.02147	123.75	31.895
VISIDKTGENFR	Unmodified	1377.73	P62701	RPS4X	40S ribosomal protein S4, X isoform	1.1818	1.7131	1.0199	1.1818	1	1	1	3	0.085257	80.245	18.157
VEKEEAGGGISEEEAAQYDR	Unmodified	2165.97	M0QZS6;Q9UBE0;M0R375;B3KNJ4;Q9UBE0-2;Q9UBE0-3	SAE1	SUMO-activating enzyme subunit 1;SUMO-activating enzyme subunit 1, N-terminally processed	1.1832	1.1832	NaN	NaN	1			3	0.020907	68.168	32.676
VYKIGGIGTVPVGR	Unmodified	1414.83	A0A087WVQ9;P68104-2;Q5VTE0;P68104;Q05639	EEF1A1;EEF1A1P5;EEF1A2	Elongation factor 1-alpha 1;Putative elongation factor 1-alpha-like 3;Elongation factor 1-alpha 2	1.1832	1.2133	1.0721	1.218	1	2	3	2;3	1.1788e-28	195.71	142.82
EEEEATKEDAEAPGIR	Unmodified	1772.81	P51858-2;P51858;P51858-3	HDGF	Hepatoma-derived growth factor	1.1857	1.052	1.2125	1.241	2	1	1	2;3	0.0024574	119.17	66.89
MKPILLQGHER	Unmodified	1320.73	Q5TFK1;Q13347	EIF3I	Eukaryotic translation initiation factor 3 subunit I	1.1858	1.2868	1.0927	NaN	1	1		3	0.007773	107.34	56.99
SYELPDGQVITIGNER	Unmodified	1789.88	P63261;P60709;Q6S8J3;Q9BYX7;A5A3E0;Q562R1;P63267;P68032;P62736;P68133;P63267-2	ACTG1;ACTB;POTEE;POTEKP;POTEF;ACTBL2;ACTG2;ACTC1;ACTA2;ACTA1	Actin, cytoplasmic 2;Actin, cytoplasmic 2, N-terminally processed;Actin, cytoplasmic 1;Actin, cytoplasmic 1, N-terminally processed;POTE ankyrin domain family member E;Putative beta-actin-like protein 3;Putative beta-actin-like protein 3, N-terminally processed;POTE ankyrin domain family member F;Beta-actin-like protein 2;Actin, gamma-enteric smooth muscle;Actin, alpha cardiac muscle 1;Actin, aor…	1.1863	1.0732	1.4681	1.1863	4	1	1	2	0.0033935	131.69	88.384
ILYATDEGFVIPDEGGPQEEQEEY	Unmodified	2727.21	Q15691	MAPRE1	Microtubule-associated protein RP/EB family member 1	1.1874	1.1874	NaN	NaN	1			3	0.0027814	69.361	67.49
AKLDKSQIHDIVLVGGSTR	Unmodified	2036.14	E9PKE3;P11142;P11142-2;E9PNE6;E9PN89;A8K7Q2	HSPA8	Heat shock cognate 71 kDa protein	1.1879	NaN	1.0771	1.5103		3	2	3;4	0.00050477	96.447	55.97
GTDNPLSGGDQYQNITVHR	Unmodified	2070.97	P13010;C9JZ81	XRCC5	X-ray repair cross-complementing protein 5	1.1892	1.2915	1.3052	1.1644	3	1	1	3	8.3596e-05	140.8	107.8
TGNLCMVTGGANLGR	Unmodified	1519.72	P62701	RPS4X	40S ribosomal protein S4, X isoform	1.1904	1.1904	NaN	NaN	1			2	0.19945	73.466	28.827
VKPWDDETDMAKLEECVR	Unmodified	2220.02	P24534	EEF1B2	Elongation factor 1-beta	1.192	1.2945	1.192	1.4443	2	1	2	4	0.026326	75.445	51.403
MAEANRALAHYR	Unmodified	1401.69	J3KSI8;J3QQS1;J3QLS3;Q9Y2R9	MRPS7	28S ribosomal protein S7, mitochondrial	1.1924	1.1568	1.2291	NaN	1	1		2	0.017064	98.033	66.611
TNEKVELQELNDR	Unmodified	1586.79	P08670;B0YJC4;A0A1B0GTT5;P17661	VIM;DES	Vimentin;Desmin	1.1928	0.96167	1.1163	1.1928	2	2	1	3	0.0085433	114.7	63.093
AVPTLTPCR	Unmodified	1013.53	P31930	UQCRC1	Cytochrome b-c1 complex subunit 1, mitochondrial	1.1943	1.0089	NaN	1.4138	1		1	2	0.16816	77.282	37.014
AEGSVTSVGSVNPAENFR	Unmodified	1819.87	P13010	XRCC5	X-ray repair cross-complementing protein 5	1.1954	1.1954	1.0281	1.0226	1	2	2	2	2.1252e-07	135.81	75.653
ATAEEEEDFGEEAEEEA	Unmodified	1883.71	Q5JP53;P07437;Q5ST81	TUBB	Tubulin beta chain	1.1977	1.1977	1.1766	1.2136	1	1	1	2	0.0017988	129.88	116.68
DLIIFPDDCEFKR	Unmodified	1666.8	Q16186	ADRM1	Proteasomal ubiquitin receptor ADRM1	1.198	NaN	1.198	NaN		1		3	0.13444	84.169	41.852
APLDLDKYVEIAR	Unmodified	1501.81	O00743-2;O00743;O00743-3	PPP6C	Serine/threonine-protein phosphatase 6 catalytic subunit;Serine/threonine-protein phosphatase 6 catalytic subunit, N-terminally processed	1.2011	1.2011	1.229	0.97776	1	2	2	3	0.0080512	105.66	79.535
NPLSGGDQYQNITVHR	Unmodified	1797.88	P13010;C9JZ81	XRCC5	X-ray repair cross-complementing protein 5	1.2035	1.2035	NaN	NaN	1			3	0.11149	78.249	37.526
FSLADAINTEFKNTR	Unmodified	1725.87	P08670;B0YJC4;A0A1B0GTT5;A0A1B0GVG8	VIM	Vimentin	1.2036	0.91373	2.2449	1.4798	4	1	1	2;3	4.2281e-39	198.48	170.55
MDGIVPDIAVGTKR	Acetyl (N-term)	1512.8	K7EKJ7;A0A0U1RRM4;P26599;P26599-2;P26599-3;A0A0D9SF20	PTBP1	Polypyrimidine tract-binding protein 1	1.2038	1.2229	1.1351	1.2038	1	1	1	2	0.00062214	113.38	89.035
SDSEKLNLDSIIGR	Acetyl (N-term)	1587.81	E9PMD7;P62136-3;P62136;P62136-2	PPP1CA	Serine/threonine-protein phosphatase;Serine/threonine-protein phosphatase PP1-alpha catalytic subunit	1.2062	1.1946	1.4181	1.0962	2	3	2	2;3	3.3887e-206	95.477	33.698
GEVINEKDR	Unmodified	1058.54	A0A087WT48;O60884	DNAJA2	DnaJ homolog subfamily A member 2	1.2119	1.2119	1.1357	0.89679	1	1	1	2	0.00014342	137.9	51.11
DLLPAGTEDYIHIR	Unmodified	1611.83	K7EM18;P41567;O60739	EIF1;EIF1B	Eukaryotic translation initiation factor 1;Eukaryotic translation initiation factor 1b	1.2139	1.226	1.1613	1.5211	1	1	2	3	2.1751e-18	184.34	137.55
EATIIDILTKR	Unmodified	1271.74	P04083;Q5T3N1;Q5T3N0	ANXA1	Annexin A1;Annexin	1.2152	1.2298	1.2007	1.2719	1	2	2	3	3.2906e-31	172.8	90.055
EVEEWQHR	Unmodified	1111.5	E7EQR4;P15311	EZR	Ezrin	1.2152	1.2152	NaN	NaN	1			3	0.062252	146.54	40.186
LPSVEAQLGSHR	Unmodified	1292.68	Q15149-9;Q15149-7;Q15149-8;Q15149-5;Q15149-4;Q15149-6;Q15149-3;Q15149-2;Q15149;E9PMV1	PLEC	Plectin	1.2161	1.1195	1.3209	1.202	1	1	2	3	0.0071546	108.72	97.457
EEKFITIFGTR	Unmodified	1339.71	P08758;D6RBE9;D6RBL5	ANXA5	Annexin A5;Annexin	1.2175	1.2557	1.2175	1.1765	2	2	1	3	3.2796e-06	130.56	62.027
SYGRPPPDVEGMTSLKVDNLTYR	Oxidation (M);Acetyl (N-term)	2652.29	J3QL05;J3KP15;Q01130-2;Q01130	SRSF2	Serine/arginine-rich splicing factor 2	1.2183	1.3032	1.1123	1.2183	2	1	1	3	0.0033065	40.137	16.07
GDDLLPAGTEDYIHIR	Unmodified	1783.87	K7EM18;P41567;O60739	EIF1;EIF1B	Eukaryotic translation initiation factor 1;Eukaryotic translation initiation factor 1b	1.2192	1.2192	1.2067	1.1428	1	1	1	3	0.0083587	102.63	66.821
AAATGAVAASAASGQAEGKKITDLR	Acetyl (N-term)	2356.23	H0YLW7;H0YMW8;H0YNF3;H0YMR6;H0YLE6;H0YL55;H7BXE3;Q9NWH9	SLTM	SAFB-like transcription modulator	1.2203	0.94819	4.9415	1.2921	5	4	3	3	1.2036e-20	117.38	64.321
AENVAVPEAAEER	Unmodified	1383.66	C9JZG1;P55884;P55884-2	EIF3B	Eukaryotic translation initiation factor 3 subunit B	1.2224	1.2804	0.84396	0.95512	1	1	1	2	0.007985	106.01	52.325
GGDGQAGPDEGEVDSCLR	Unmodified	1817.75	B1ALC0;O15511;O15511-2	ARPC5	Actin-related protein 2/3 complex subunit 5	1.2249	1.2249	1.2321	1.1151	5	3	3	2	4.8436e-45	174.59	126.59
AAAMDVDTPSGTNSGAGKKR	Acetyl (N-term)	1974.94	P62877	RBX1	E3 ubiquitin-protein ligase RBX1;E3 ubiquitin-protein ligase RBX1, N-terminally processed	1.2255	1.2376	NaN	1.2136	1		1	3	2.0347e-05	89.468	74.433
NIQEPEEETANQEYKVSSCEQR	Unmodified	2667.17	D6R9F5;F8WA26;Q8WX93-4;Q8WX93-8;Q8WX93-3;Q8WX93-2;Q8WX93-5;Q8WX93	PALLD	Palladin	1.2266	1.2266	NaN	NaN	2			3	0.00073985	86.727	37.638
CHLAQVPSHTVVAR	Unmodified	1573.81	P02787	TF	Serotransferrin	1.2278	1.3532	1.114	NaN	1	1		4	0.0077283	99.732	89.66
IEVDLLKNGER	Unmodified	1284.7	H0YLF3;F5H6I0;P61769	B2M	Beta-2-microglobulin;Beta-2-microglobulin form pI 5.3	1.2291	0.20305	1.3389	1.2291	2	1	1	3	7.7143e-05	121.61	63.016
ADASKGDDLLPAGTEDYIHIR	Unmodified	2256.1	K7EM18;P41567	EIF1	Eukaryotic translation initiation factor 1	1.23	1.1415	1.0421	1.3479	2	4	4	3;4	1.1857e-05	95.5	46.601
TFVHVTDLSGKETICR	Unmodified	1861.94	E5RH77;P62263	RPS14	40S ribosomal protein S14	1.2311	NaN	1.2311	NaN		2		4	0.046609	81.904	64.203
GFDVASVQQQR	Unmodified	1233.61	O60664-4;O60664-3;O60664;K7ERZ3;O60664-2	PLIN3	Perilipin-3	1.2328	1.2328	1.2009	1.3885	1	1	1	2	0.00051578	122.33	105.23
GPEGQAYDVDFTPPFR	Unmodified	1794.82	Q15046;Q15046-2	KARS	Lysine--tRNA ligase	1.2356	1.3056	1.2356	1.1861	1	1	2	2	0.0027507	147.18	104.75
AHAGEYGAEALER	Unmodified	1372.64	P69905	HBA1	Hemoglobin subunit alpha	1.2358	1.4586	1.0471	NaN	1	1		3	0.0065443	120.87	27.106
EIPPLEGDEDASR	Unmodified	1426.66	P08238;Q58FF7	HSP90AB1;HSP90AB3P	Heat shock protein HSP 90-beta;Putative heat shock protein HSP 90-beta-3	1.2359	1.2373	1.1626	1.1167	1	1	1	2	0.008761	101.93	49.35
TDEESILTLLTSR	Unmodified	1476.77	P08758;E9PHT9	ANXA5	Annexin A5;Annexin	1.2363	1.2363	1.4351	1.0767	1	1	1	2	0.0081452	105.17	73.531
DLLLDLVDAATR	Unmodified	1313.72	Q2M2I3	FAM83E	Protein FAM83E	1.2367	NaN	NaN	1.2367			1	3	0.12978	73.841	0
ALEQQEEGINR	Unmodified	1285.63	O75915	ARL6IP5	PRA1 family protein 3	1.2376	1.2304	1.421	1.2376	1	1	1	2	0.00058891	123.86	47.639
DLTVTNPKR	Unmodified	1042.58	F5H0C8;P09104-2;P09104;U3KQQ1;P13929-3;P13929-2;P13929;P06733-2;P06733	ENO2;ENO3;ENO1	Enolase;Gamma-enolase;Beta-enolase;Alpha-enolase	1.2382	1.3967	NaN	1.0977	1		1	2	0.087264	87.696	54.884
SSLEKSYELPDGQVITIGNER	Unmodified	2334.17	P63261;P60709;Q6S8J3;A5A3E0;P63267;P68032;P62736;P68133;P63267-2	ACTG1;ACTB;POTEE;POTEF;ACTG2;ACTC1;ACTA2;ACTA1	Actin, cytoplasmic 2;Actin, cytoplasmic 2, N-terminally processed;Actin, cytoplasmic 1;Actin, cytoplasmic 1, N-terminally processed;POTE ankyrin domain family member E;POTE ankyrin domain family member F;Actin, gamma-enteric smooth muscle;Actin, alpha cardiac muscle 1;Actin, aortic smooth muscle;Actin, alpha skeletal muscle	1.239	1.094	1.1836	1.0982	1	3	1	3	4.1955e-07	100.28	40.248
TQTDATSFYDR	Unmodified	1303.57	K7ELL7;P14314-2;P14314	PRKCSH	Glucosidase 2 subunit beta	1.2394	1.2026	NaN	1.2774	1		1	2	0.00092809	113.93	61.21
EVQLVESGGGLVQPGR	Unmodified	1623.86	A0A0A0MS15;P01782	IGHV3-49	Ig heavy chain V-III region DOB	1.2417	1.2561	1.2107	1.2954	2	2	2	2;3	2.5e-45	243.85	180.77
LLPAGTEDYIHIR	Unmodified	1496.8	K7EM18;P41567;O60739	EIF1;EIF1B	Eukaryotic translation initiation factor 1;Eukaryotic translation initiation factor 1b	1.2419	NaN	NaN	1.2419			1	3	0.019804	95.273	65.74
RATPENYLFQGR	Unmodified	1450.73	A0A182DWF4;A0A140T8Z3;A0A0G2JJV3;A0A0G2JII1;Q5EP54;P04440	HLA-DPB1	HLA class II histocompatibility antigen, DP beta 1 chain	1.2459	NaN	1.2864	1.2067	1	1	1	3	0.0061404	111.12	84.711
AEASSANLGSGCEEKR	Acetyl (N-term)	1706.75	V9GYI0;A0A087WT04;U3KQ54;Q6P1K2-3;Q6P1K2-6;Q6P1K2;Q6P1K2-2;Q6P1K2-5	PMF1;PMF1-BGLAP	Polyamine-modulated factor 1	1.2465	1.2465	NaN	NaN	2		1	2	2.9978e-31	135.1	111.72
EIAQDFKTDLR	Unmodified	1334.68	Q71DI3;Q16695;P68431	HIST2H3A;HIST3H3;HIST1H3A	Histone H3.2;Histone H3.1t;Histone H3.1	1.2473	0.85454	1.243	1.2516	2	1	1	3	0.024653	96.756	79.589
MESGAYGAAKAGGSFDLR	Acetyl (N-term)	1828.84	K7ELD9;K7ENG9;O43760;O43760-2	SYNGR2	Synaptogyrin-2	1.2522	0.81121	1.1138	1.3166	2	4	6	2	6.3816e-18	84.753	65.095
AILEDLVFPSEIVGKR	Unmodified	1785	B5MCP9;P62081	RPS7	40S ribosomal protein S7	1.2527	NaN	NaN	1.2527	1		1	3	0.023083	87.083	78.262
LTTTPKGGTPAGSAR	Unmodified	1413.76	Q14195;H0YBT4;Q14195-2	DPYSL3	Dihydropyrimidinase-related protein 3	1.2528	1.2528	1.2295	1.2909	1	1	1	3	0.0463	85.006	34.812
GQWSQGLISAAR	Unmodified	1272.66	Q9Y490;H0YMT1;A0A1B0GVU7;Q9Y4G6	TLN1;TLN2	Talin-1;Talin-2	1.2538	1.4273	0.91234	1.2538	1	1	1	2	0.084943	89.827	75.689
ALLGSYPVDDGCR	Unmodified	1421.66	K7EQH0;K7ER04;K7EL99;K7EP07;K7EK42;Q99426-2;Q99426	TBCB	Tubulin-folding cofactor B	1.254	1.0638	1.4783	NaN	1	1		2	0.0085086	114.4	81.023
GIVPDIAVGTKR	Unmodified	1224.72	K7EKJ7;A0A0U1RRM4;P26599;P26599-2;P26599-3;A0A0D9SF20	PTBP1	Polypyrimidine tract-binding protein 1	1.2557	1.2972	1.2155	1.4923	3	1	2	3	0.0013188	136.5	69.94
AGTIAGLNVLR	Unmodified	1083.64	E9PKE3;P11142;P11142-2;E9PN89;E9PQQ4;E9PQK7;E9PK54;E9PLF4;E9PI65	HSPA8	Heat shock cognate 71 kDa protein	1.2571	1.3324	1.2571	1.1973	1	1	1	2	9.9453e-88	227.99	175.59
LNQGIGEPQSPSR	Unmodified	1381.69	Q96C19	EFHD2	EF-hand domain-containing protein D2	1.2574	1.2403	1.2747	NaN	1	1		2	0.083946	79.201	24.138
SILPTAPR	Unmodified	853.502	E7EX17;P23588-2;P23588;F8VX11;F8W0K0;F8VRU1;F8VYE9;F8VSC7;F8VP89	EIF4B	Eukaryotic translation initiation factor 4B	1.2594	NaN	1.19	1.3329		1	1	2	0.048975	102.77	45.31
ITSDTSGDFR	Unmodified	1097.5	P04083;Q5T3N1	ANXA1	Annexin A1;Annexin	1.2597	1.2597	1.2521	1.3607	1	1	1	2	0.10675	79.906	1.5719
GPVFDLTTTPKGGTPAGSAR	Unmodified	1929	Q14195;H0YBT4;Q14195-2	DPYSL3	Dihydropyrimidinase-related protein 3	1.2626	1.3647	1.0282	1.2434	1	2	1	3	7.9834e-07	121.51	88.212
EGYGPPPPHYEGR	Unmodified	1454.66	M0QXS5;P14866-2;P14866	HNRNPL	Heterogeneous nuclear ribonucleoprotein L	1.2628	NaN	1.2628	NaN		1		3	0.065263	84.892	39.814
QLIYIPLPDEKSR	Unmodified	1570.87	P55072	VCP	Transitional endoplasmic reticulum ATPase	1.264	1.2776	1.2505	1.3677	1	1	2	3	0.073272	82.705	62.275
EYEQLSSEALEAAR	Unmodified	1594.75	Q96L21;B8A6G2;F8W7C6;A6QRI9;X1WI28;P27635	RPL10L;RPL10	60S ribosomal protein L10-like;60S ribosomal protein L10	1.2661	1.1911	NaN	1.3457	1	1	1	2	0.03802	113.83	45.276
TNQELQEINR	Unmodified	1243.62	H0YMD0;H0YMU9;H0YM50;H0YN42;P07355;P07355-2;H0YN28;H0YL33;H0YNP5;H0YNA0;H0YKS4;A6NMY6;H0YN52;H0YMM1;H0YLE2	ANXA2;ANXA2P2	Annexin;Annexin A2;Putative annexin A2-like protein	1.2669	1.2669	NaN	NaN	1	1		2	0.00087768	112.3	41.897
DMNLSESLLR	Unmodified	1176.58	J3KT04;J3KS93;J3QQP0;J3KS25;J3QR64;J3KTB5;J3QL43;J3QS69;J3KT12;P60842-2;P60842	EIF4A1	Eukaryotic initiation factor 4A-I	1.2671	1.3226	1.1814	1.2671	1	1	1	2	0.01358	104.01	34.015
GQAGPDEGEVDSCLR	Unmodified	1588.68	B1ALC0;O15511;O15511-2	ARPC5	Actin-related protein 2/3 complex subunit 5	1.2729	1.2808	1.1922	1.2729	1	1	1	2	2.1673e-12	178.71	154.99
ADAAPQLGKR	Acetyl (N-term)	1067.57	Q96C86	DCPS	m7GpppX diphosphatase	1.2756	NaN	1.2756	NaN	1	1		2	0.021645	101.33	58.204
ANTVLSGGTTMYPGIADR	Unmodified	1822.89	P63261;P60709	ACTG1;ACTB	Actin, cytoplasmic 2;Actin, cytoplasmic 2, N-terminally processed;Actin, cytoplasmic 1;Actin, cytoplasmic 1, N-terminally processed	1.276	1.2178	1.3359	1.276	2	2	5	2	1.5308e-18	180.48	150
QSVVNSGNLLNDMTPPVNPSR	Unmodified	2238.11	P27824-3;P27824;P27824-2;D6RGY2	CANX	Calnexin	1.2783	1.1975	1.1946	1.6677	4	1	3	2;3	4.0259e-10	127.32	88.317
METEQPEETFPNTETNGEFGKR	Oxidation (M);Acetyl (N-term)	2628.13	P61978-3;P61978;P61978-2;Q5T6W2;S4R457	HNRNPK	Heterogeneous nuclear ribonucleoprotein K	1.2808	1.1541	1.3808	0.9298	2	1	1	3	0.00072054	52.185	31.739
EESILTLLTSR	Unmodified	1260.69	P08758;E9PHT9	ANXA5	Annexin A5;Annexin	1.282	NaN	NaN	1.282			1	2	0.00053103	120.27	120.27
SEDLPLNISR	Unmodified	1142.59	P08238;Q58FF7;P07900;P07900-2	HSP90AB1;HSP90AB3P;HSP90AA1	Heat shock protein HSP 90-beta;Putative heat shock protein HSP 90-beta-3;Heat shock protein HSP 90-alpha	1.2822	1.1739	1.2822	1.5255	1	2	1	2	3.9067e-12	167.12	0
EDTLIEILASR	Unmodified	1258.68	P04083;Q5T3N1	ANXA1	Annexin A1;Annexin	1.2848	NaN	NaN	1.2848			1	2	0.091205	81.338	18.515
ADKEAAFDDAVEER	Acetyl (N-term)	1606.71	E9PNS2;E9PIC4;E9PNS6;Q09028-3;Q09028	RBBP4	Histone-binding protein RBBP4	1.2858	2.5545	1.3414	0.38822	2	1	3	2	0.00017551	133.91	94.646
SPVDICTAKPR	Unmodified	1242.64	Q8TCE1;P01008	SERPINC1	Antithrombin-III	1.2864	1.2355	1.3394	NaN	1	1		3	0.019513	98.898	60.331
EILEASDGIMVAR	Unmodified	1402.71	H3BTN5;P14618-2;P14618;P14618-3;H3BR70;B4DNK4	PKM	Pyruvate kinase;Pyruvate kinase PKM	1.2919	1.4334	1.2451	1.2919	1	2	1	2	0.01995	110.39	42.824
LEPTVIDEIR	Unmodified	1183.64	P68366-2;P68366;C9JDL2;C9JEV8;C9JQ00;C9JJQ8	TUBA4A	Tubulin alpha-4A chain	1.2956	1.2852	1.306	NaN	1	1		2	0.022079	123.35	32.037
QYELLCLDNTR	Unmodified	1423.68	P02787;C9JVG0	TF	Serotransferrin	1.2993	NaN	1.2993	NaN		1		2	0.12375	95.775	47.906
EVQLVESGEGLVQPGGSLR	Unmodified	1953.02	A0A075B6Q5	IGHV3-64		1.3001	1.6068	1.3172	1.2832	3	1	1	2	0.055964	73.022	17.709
CQLADVNNIGKYR	Unmodified	1549.77	P28838-2;P28838	LAP3	Cytosol aminopeptidase	1.3009	0.96014	1.32	1.3248	1	2	2	3	0.0088008	101.72	78.008
ALAGEFIR	Unmodified	875.486	F8VY02;P30040	ERP29	Endoplasmic reticulum resident protein 29	1.301	1.301	1.2103	1.306	1	1	1	2	1.2203e-10	157.21	46.871
QVEVFSPPGSDR	Unmodified	1316.64	P12110;P12110-3;P12110-2;C9JH44	COL6A2	Collagen alpha-2(VI) chain	1.303	1.5821	NaN	1.0732	1		1	2	0.018701	97.456	12.713
SIEKIWAR	Acetyl (N-term)	1043.58	F5H0C8;P09104-2;P09104;F5H1C3	ENO2	Enolase;Gamma-enolase	1.3062	NaN	1.1892	1.3062		1	2	2	0.051533	85.265	22.117
AAEADGPLKR	Acetyl (N-term)	1068.56	J3KSI4;I3L1D2;I3L4E0;J3QS48;I3L295;J3KT75;J3QW43;J3QRD5;O75352-2;O75352	MPDU1	Mannose-P-dolichol utilization defect 1 protein	1.3065	1.2556	1.3229	1.1474	1	1	1	2	0.029805	72.23	31.452
FAVAIPTFR	Unmodified	1020.58	E7ENL6;P12111-4;P12111-2;P12111;P12111-3;P12111-5	COL6A3	Collagen alpha-3(VI) chain	1.3078	1.3078	NaN	NaN	1			2	0.16816	77.282	26.317
SFDDMNLSESLLR	Unmodified	1525.71	J3KT04;J3KS93;J3QQP0;J3KS25;J3QR64;J3KTB5;J3QL43;J3QS69;J3KT12;P60842-2;P60842	EIF4A1	Eukaryotic initiation factor 4A-I	1.3087	1.3087	1.2584	1.3435	1	1	1	2	0.008761	101.93	38.713
FGLESTAGEIPVVAIR	Unmodified	1657.9	P30101	PDIA3	Protein disulfide-isomerase A3	1.3133	1.3711	1.3108	1.3218	2	3	2	2;3	0.0085882	96.306	59.622
VAASEFFR	Unmodified	925.466	P06733-2;P06733	ENO1	Alpha-enolase	1.3168	1.3168	1.3017	1.1714	1	1	1	2	1.656e-05	146.94	55.959
DFQKKWQEEMELYR	Unmodified	1928.91	P02647;F8W696	APOA1	Apolipoprotein A-I;Proapolipoprotein A-I;Truncated apolipoprotein A-I	1.3177	NaN	1.0127	1.7145		1	1	4	0.18312	66.393	40.57
GIMDAANFEQFLQER	Oxidation (M)	1783.82	P35268	RPL22	60S ribosomal protein L22	1.3181	1.4824	1.1248	1.2419	4	4	2	2;3	0.00029913	136.38	91.513
SIMKCDVDIR	Unmodified	1235.6	P63261;P60709;Q562R1	ACTG1;ACTB;ACTBL2	Actin, cytoplasmic 2;Actin, cytoplasmic 2, N-terminally processed;Actin, cytoplasmic 1;Actin, cytoplasmic 1, N-terminally processed;Beta-actin-like protein 2	1.3197	1.3709	1.3197	0.85228	1	1	1	3	0.027772	94.363	70.639
TAGEIPVVAIR	Unmodified	1124.66	P30101	PDIA3	Protein disulfide-isomerase A3	1.3246	1.1617	1.3246	1.4112	1	1	1	2	0.086167	81.972	15.701
TFFSETGAGKHVPR	Unmodified	1532.77	Q71U36-2;Q71U36;P68363;F5H5D3;Q9BQE3;F8VVB9;F8VQQ4;P68363-2;Q6PEY2;Q13748;Q13748-2;A0A1W2PQM2;F8VRK0;F8VX09;F8VWV9;F8VRZ4;F8VS66;F8W0F6	TUBA1A;TUBA1B;TUBA1C;TUBA3E;TUBA3C	Tubulin alpha-1A chain;Tubulin alpha-1B chain;Tubulin alpha-1C chain;Tubulin alpha-3E chain;Tubulin alpha-3C/D chain	1.3254	1.2687	1.3845	NaN	1	1		4	0.021247	103.46	58.115
DTIKSNLDRALGR	Unmodified	1457.8	H0YL11;P48735-2;P48735	IDH2	Isocitrate dehydrogenase [NADP], mitochondrial	1.3281	NaN	1.4318	1.2319		1	1	3	0.1467	70.089	8.7455
TESLEIFQNEVAR	Unmodified	1534.76	Q9BS26	ERP44	Endoplasmic reticulum resident protein 44	1.3284	1.3511	1.0715	1.9935	1	3	1	2	0.0084497	115.91	67.491
DNGEGIILFR	Unmodified	1132.59	P30101	PDIA3	Protein disulfide-isomerase A3	1.329	1.329	1.3233	1.2511	1	1	1	2	3.4761e-20	186.41	132.25
MEKEETTR	Acetyl (N-term)	1064.48	Q09666;E9PKR9;E9PLK4;E9PQE3;E9PJZ0;E9PJC6;Q09666-2	AHNAK	Neuroblast differentiation-associated protein AHNAK	1.3305	2.9976	NaN	0.59052	1		1	2	0.043034	61.962	25.406
EMTSLSEYVSR	Unmodified	1300.6	P08238	HSP90AB1	Heat shock protein HSP 90-beta	1.3316	1.3366	1.1791	1.2753	1	1	1	2	0.00026239	139.38	77.691
LEEAEEPDMEEDDDQKAVKDEL	Unmodified	2576.1	H7BZ94;P07237;H0Y3Z3	P4HB	Protein disulfide-isomerase	1.3322	NaN	1.3233	2.1972		2	1	3	8.6079e-07	109.28	65.474
NSPLDEENLTQENQDR	Unmodified	1900.84	G3V595;P01011-3;P01011-2;P01011	SERPINA3	Alpha-1-antichymotrypsin;Alpha-1-antichymotrypsin His-Pro-less	1.333	1.333	1.2918	1.4466	1	1	3	2	0.0072948	120.53	87.58
GPICLVLAPTR	Unmodified	1195.67	A0A1X7SBZ2;A0A1W2PQ51;Q92841-1;Q92841-3;Q92841-2;Q92841;J3KRZ1;J3QRQ7;J3KTA4;P17844-2;P17844	DDX17;DDX5	Probable ATP-dependent RNA helicase DDX17;Probable ATP-dependent RNA helicase DDX5	1.3347	NaN	1.3777	1.293		1	1	2	0.038621	91.265	69.028
TSEGVNQDTFGR	Unmodified	1309.59	E7ENL6;P12111-4;P12111-2;P12111	COL6A3	Collagen alpha-3(VI) chain	1.3413	1.3282	1.5586	1.3413	1	1	1	2	0.00079588	139.38	72.814
TTPEPCELDDEDFR	Unmodified	1722.7	D6RD81;E7EVL5;D6RFL4;P08571	CD14	Monocyte differentiation antigen CD14;Monocyte differentiation antigen CD14, urinary form;Monocyte differentiation antigen CD14, membrane-bound form	1.3414	1.261	1.4268	NaN	1	1		2	0.020583	91.855	68.482
ESTNVDMSLAQR	Unmodified	1349.62	P50995-2;P50995	ANXA11	Annexin A11	1.343	1.4705	NaN	1.2264	1		1	2	0.067101	84.507	31.929
EVELVSGVVAR	Unmodified	1156.65	K7ESA3;Q99536-2;Q99536-3;Q99536	VAT1	Synaptic vesicle membrane protein VAT-1 homolog	1.3449	NaN	NaN	1.3449			1	2	0.047893	89.047	3.3168
VPSPYEVR	Unmodified	945.492	P30101	PDIA3	Protein disulfide-isomerase A3	1.3474	1.3324	1.3474	1.4259	1	1	1	2	0.10572	91.906	61.721
YELLCLDGTR	Unmodified	1238.6	P02787	TF	Serotransferrin	1.3481	1.3484	1.3478	1.2768	1	1	2	2	0.046273	89.355	27.392
TGKTPVEPEVAIHR	Unmodified	1532.83	E5RJX2;P60866;P60866-2;E5RIP1	RPS20	40S ribosomal protein S20	1.3501	1.4918	1.1543	1.3443	1	2	3	3;4	0.0069652	106.58	82.286
VLELTDDNFESR	Unmodified	1436.68	P30101;H7BZJ3;F8WBS6;F8WBW5	PDIA3	Protein disulfide-isomerase A3	1.3501	1.3257	1.3788	1.465	4	3	3	2	2.5872e-17	182.46	156.08
AEEDGGTVSQEEEDR	Unmodified	1649.67	P27824-3;P27824;P27824-2	CANX	Calnexin	1.3513	1.3252	1.2576	1.6064	4	2	3	2	2.2628e-78	211.26	152.56
EVEIIQGLTR	Unmodified	1156.65	A0A087X0S5;P12109	COL6A1	Collagen alpha-1(VI) chain	1.354	1.3632	NaN	1.3449	1		1	2	0.037856	91.087	13.805
ESHSEWVSCVR	Unmodified	1374.6	H0Y8R5;H0YAF8;D6R9Z1;H0YAM7;D6RAC2;J3KPE3;H0Y8W2;D6R9L0;D6REE5;P63244;D6RBD0;D6RFX4;D6RFZ9;D6RHH4	GNB2L1	Guanine nucleotide-binding protein subunit beta-2-like 1;Guanine nucleotide-binding protein subunit beta-2-like 1, N-terminally processed	1.3541	1.345	NaN	1.3633	1		1	3	0.10172	80.014	58.714
YATMLPDSTEIDQDTINR	Unmodified	2081.96	P12110;P12110-3;P12110-2	COL6A2	Collagen alpha-2(VI) chain	1.3564	1.3564	1.3294	1.1539	1	1	1	3	0.096926	65.105	53.204
GVLELVPQR	Unmodified	1009.59	P98160	HSPG2	Basement membrane-specific heparan sulfate proteoglycan core protein;Endorepellin;LG3 peptide	1.3573	1.4573	1.2641	1.342	1	1	2	2	3.2108e-09	150.84	69.54
GADCIMLSGETAKGDYPLEAVR	Oxidation (M)	2368.1	H3BTN5;P14618-2;P14618;P14618-3;H3BR70;B4DNK4	PKM	Pyruvate kinase;Pyruvate kinase PKM	1.3606	1.2963	1.9126	NaN	2	1		3	4.662e-08	100.39	57.681
CIMLSGETAKGDYPLEAVR	Oxidation (M)	2125.02	H3BTN5;P14618-2;P14618;P14618-3;H3BR70;B4DNK4	PKM	Pyruvate kinase;Pyruvate kinase PKM	1.3654	1.4489	1.0794	1.4623	1	3	2	3	0.0090029	79.92	45.049
RAPEAWDYGQGFVNEEMIR	Unmodified	2267.04	P00387-2;P00387;P00387-3	CYB5R3	NADH-cytochrome b5 reductase 3;NADH-cytochrome b5 reductase 3 membrane-bound form;NADH-cytochrome b5 reductase 3 soluble form	1.3657	1.7786	1.1656	1.1571	3	1	1	3	0.047415	88.574	47.959
AQDQGEKENPMR	Acetyl (N-term)	1443.64	P62913	RPL11	60S ribosomal protein L11	1.3736	1.3554	1.3795	1.3736	1	1	1	2	3.4241e-60	120.45	93.779
GGAWGTEQR	Unmodified	960.441	P09382	LGALS1	Galectin-1	1.3737	1.4159	1.3328	NaN	1	1		2	0.12629	82.452	29.667
SSQSSSQQFSGIGR	Unmodified	1454.67	A0A1X7SBZ2;A0A1W2PQ51;Q92841-1;Q92841-3;Q92841-2;Q92841	DDX17	Probable ATP-dependent RNA helicase DDX17	1.3787	1.3787	NaN	NaN	1			2	0.0096994	129.34	55.178
AANFEQFLQER	Unmodified	1351.65	P35268;K7EJT5;K7EP65;K7EKS7;K7ELC4;K7EMH1;K7ERI7	RPL22	60S ribosomal protein L22	1.3808	1.4563	1.339	1.3808	1	1	1	2	1.1259e-34	198.62	109.68
AATASAGAGGIDGKPR	Acetyl (N-term)	1440.73	I3L1P8;Q02978-2;Q02978	SLC25A11	Mitochondrial 2-oxoglutarate/malate carrier protein	1.381	0.80026	2.3886	2.1052	2	2	1	2	9.6948e-14	81.494	33.625
GEEAGAYDGPR	Unmodified	1120.48	P30101;H7BZJ3	PDIA3	Protein disulfide-isomerase A3	1.3837	1.4624	1.3533	1.3837	1	1	1	2	1.625e-72	219.8	124.27
FYAGGQVYPGEASR	Unmodified	1500.7	A6NG45;Q13162	PRDX4	Peroxiredoxin-4	1.3853	1.3853	NaN	NaN	1			2	0.1321	79.201	19.182
ATANDVPSPYEVR	Unmodified	1417.68	P30101	PDIA3	Protein disulfide-isomerase A3	1.3872	1.3457	1.3872	1.474	1	1	1	2	2.8553e-92	227.36	156.97
GSQSAGPEFQYVR	Unmodified	1424.67	E7ENL6;P12111-4;P12111-2;P12111;P12111-3;P12111-5	COL6A3	Collagen alpha-3(VI) chain	1.3873	1.6479	1.3129	1.3873	1	1	1	2	0.0081897	119.27	70.276
GPSQMALEDLAMFR	Unmodified	1564.74	P29401;P29401-2;A0A0B4J1R6	TKT	Transketolase	1.3876	1.389	1.3876	1.414	2	2	2	2;3	4.997e-37	196.7	166.95
AGHQTSAESWGTGR	Unmodified	1443.65	H3BTP7;H3BU31;P36578	RPL4	60S ribosomal protein L4	1.3945	1.2929	1.5675	1.3945	1	1	1	3	0.11489	73.877	40.682
SVGIEADDDR	Unmodified	1075.48	P05387	RPLP2	60S acidic ribosomal protein P2	1.3962	1.3962	1.3384	1.5064	1	1	1	2	0.0012332	116.52	50.247
AGEFVDLYVPR	Unmodified	1264.65	Q9BYK2;Q8WVC2;Q9BYK1;P63220	RPS21	40S ribosomal protein S21	1.3987	1.3397	1.4464	1.3987	1	1	1	2	1.5496e-07	154.01	101.53
AFKDTGKTPVEPEVAIHR	Acetyl (N-term)	2036.07	E5RJX2;P60866;P60866-2;E5RIP1	RPS20	40S ribosomal protein S20	1.3999	1.8635	1.3442	1.2807	1	4	4	3;4	0.00044876	61.265	16.825
ADQGEKENPMR	Acetyl (N-term)	1315.58	P62913-2	RPL11	60S ribosomal protein L11	1.4002	1.4002	1.3993	1.3321	1	1	1	2	0.00056917	68.846	35.847
LTEDQLPSCESLKDTIAR	Unmodified	2075.02	P18669	PGAM1	Phosphoglycerate mutase 1	1.4009	1.3073	1.4384	1.1703	2	2	2	3	0.0039921	86.411	44.668
LKSEISGDLAR	Unmodified	1187.65	E5RK69;P08133-2;P08133;E7EMC6	ANXA6	Annexin;Annexin A6	1.4049	NaN	1.2007	1.6437		1	1	3	0.029295	94.82	45.76
EIEQVILVGGATR	Unmodified	1383.77	A0A087X054;Q9Y4L1;E9PJ21;A0A087WWI4;K7EQK2;Q9Y4L1-2	HYOU1	Hypoxia up-regulated protein 1	1.4052	NaN	1.4052	NaN		2		2	0.021536	106.67	51.604
TAIYEVSPRR	Unmodified	1190.64	M0R252	ZFP36		1.4057	NaN	1.4057	NaN		1		3	0.056217	87.308	4.8909
FGVNEDLADSDAR	Unmodified	1407.63	P04083	ANXA1	Annexin A1	1.4088	1.4088	1.5158	1.3431	1	1	1	2	0.0083873	111.86	60.789
AITGASLADIMAKR	Unmodified	1416.78	C9JXB8;C9JNW5;P83731	RPL24	60S ribosomal protein L24	1.409	1.409	NaN	NaN	1			3	0.031941	99.669	63.365
SDVLELTDDNFESR	Unmodified	1638.74	P30101;H7BZJ3;F8WBS6;F8WBW5	PDIA3	Protein disulfide-isomerase A3	1.4106	1.356	1.2145	1.3411	10	7	11	2;3	0	336.92	300.25
EISQPAQELKR	Unmodified	1297.7	E7ENL6;P12111-4;P12111-2;P12111;P12111-3;P12111-5;C9JNG9	COL6A3	Collagen alpha-3(VI) chain	1.4129	1.4442	1.3824	NaN	1	1		3	0.19257	69.261	10.587
ALGLNIYEQNDR	Unmodified	1404.7	P26038	MSN	Moesin	1.4152	1.1772	1.2872	NaN	3	1		2	0.073552	83	54.795
MVNDGVEDLR	Unmodified	1146.53	A8MX94;P09211	GSTP1	Glutathione S-transferase P	1.4159	1.2681	1.5809	NaN	1	1		2	0.015674	118.03	46.341
AQDVSLALTQR	Unmodified	1200.65	E7ENL6;P12111-4;P12111-2;P12111	COL6A3	Collagen alpha-3(VI) chain	1.4174	1.5387	1.3056	NaN	1	1		2	0.022972	97.456	45.602
GSASVGSHNFDTTKR	Unmodified	1562.74	A0A087X0S5;P12109	COL6A1	Collagen alpha-1(VI) chain	1.4178	1.4178	NaN	NaN	1			4	0.008587	103.3	64.996
IPENVDITLKGR	Unmodified	1353.76	P32969;E7ESE0;D6RAN4	RPL9	60S ribosomal protein L9	1.4183	NaN	1.455	1.3826		1	1	3	0.17754	69.216	19.768
AANYNDINDVKR	Unmodified	1391.68	Q15181	PPA1	Inorganic pyrophosphatase	1.4194	1.386	1.4536	1.5345	1	1	2	3	0.0054586	121.02	85.427
GTTMYPGIADR	Unmodified	1180.55	P63261;P60709;A6NL76;P63267;P68032;P62736;P68133;P63267-2	ACTG1;ACTB;ACTA1;ACTG2;ACTC1;ACTA2	Actin, cytoplasmic 2;Actin, cytoplasmic 2, N-terminally processed;Actin, cytoplasmic 1;Actin, cytoplasmic 1, N-terminally processed;Actin, gamma-enteric smooth muscle;Actin, alpha cardiac muscle 1;Actin, aortic smooth muscle;Actin, alpha skeletal muscle	1.42	1.42	1.4589	1.2987	1	1	1	2	0.014851	102.07	52.254
GIYVSEKGTVQQADE	Unmodified	1622.78	P32969;H0Y9R4;H0Y9V9	RPL9	60S ribosomal protein L9	1.4201	1.2713	1.4254	1.6216	5	4	3	2	2.9308e-09	149.23	97.227
CTLKLDPITGR	Unmodified	1272.69	D6RD83;D6RF44;D6RBQ9;H0YA96;D6RAF8;H0Y8G5;Q14103-4;Q14103-3;Q14103-2;Q14103	HNRNPD	Heterogeneous nuclear ribonucleoprotein D0	1.4208	1.2079	1.3063	1.5453	2	1	1	3	0.00074353	115.91	63.748
GNSQGATPAAIEKAVQEAQR	Unmodified	2025.02	A0A087X0S5;P12109	COL6A1	Collagen alpha-1(VI) chain	1.422	1.5548	1.4146	1.4387	3	1	2	3	8.9681e-06	117.27	103.3
AAPEEESAYVAGEKR	Unmodified	1605.76	F2Z2K0;Q9UNZ2-6;Q9UNZ2;Q9UNZ2-5	NSFL1C	NSFL1 cofactor p47	1.4222	1.4222	NaN	NaN	1			3	0.0077375	127.79	77.007
MFSWVSKDAR	Acetyl (N-term)	1267.6	C9JIJ3;C9IZH1;C9JC03;A0A024R571;Q9H4M9	EHD1	EH domain-containing protein 1	1.4231	1.4762	1.3312	1.4231	1	1	1	2	2.7868e-11	103.55	27.325
ACGLVASNLNLKPGECLR	Acetyl (N-term)	2013.01	P09382;F8WEI7	LGALS1	Galectin-1	1.4248	1.4467	1.4867	1.2954	3	2	3	2;3	1.9647e-11	99.844	71.877
AATTVNNSTPDFGFGGQKR	Unmodified	1966.95	A0A087WTP3;Q92945;M0R0I5	KHSRP	Far upstream element-binding protein 2	1.4256	0.99112	1.4702	1.0353	2	1	2	3	5.3819e-10	145.33	92.161
CIMLSGETAKGDYPLEAVR	Unmodified	2109.02	H3BTN5;P14618-2;P14618;P14618-3;H3BR70;B4DNK4	PKM	Pyruvate kinase;Pyruvate kinase PKM	1.4257	1.303	1.4332	1.5366	1	2	3	3	3.6915e-12	152.71	100.34
AASSLTVDVTPPTAKAPTTVEDR	Unmodified	2326.2	Q9H8Y8-2;Q9H8Y8;Q9H8Y8-3	GORASP2	Golgi reassembly-stacking protein 2	1.4258	NaN	1.4258	NaN		1		3	0.00047651	86.748	58.582
SVDFSLADAINTEFKNTR	Unmodified	2027	P08670;B0YJC4;A0A1B0GTT5;A0A1B0GVG8	VIM	Vimentin	1.4271	1.4271	NaN	NaN	1			3	0.01541	81.594	51.512
KKAEAGAGSATEFQFR	Unmodified	1696.85	P46783;Q9NQ39	RPS10;RPS10P5	40S ribosomal protein S10;Putative 40S ribosomal protein S10-like	1.4297	1.5765	1.2112	1.3578	2	1	1	3;4	0.0087576	93.716	47.057
GIMDAANFEQFLQER	Unmodified	1767.83	P35268	RPL22	60S ribosomal protein L22	1.4303	1.3043	1.3557	1.4739	2	1	2	2;3	0.00029913	136.27	85.064
GGYGGSSSSSSYGSGR	Unmodified	1451.59	F8W6I7;P09651-3;P09651-2;P09651;H0YH80	HNRNPA1	Heterogeneous nuclear ribonucleoprotein A1;Heterogeneous nuclear ribonucleoprotein A1, N-terminally processed	1.4328	1.4272	1.4384	NaN	1	1	1	2	0.00095639	135.1	97.986
AEKPEDWDEDMDGEWEAPQIANPR	Unmodified	2827.2	P27824-3;P27824;P27824-2;D6RGY2	CANX	Calnexin	1.4334	1.2751	1.3266	1.4334	4	4	1	3	1.0428e-11	143.09	123.06
LATNTSAPDLKNVR	Unmodified	1498.81	E7EVA0;P27816-5;P27816-2;P27816-6;P27816;H0Y2V1;H7C4C5;B5MEG9;F8W9U4;P27816-4	MAP4	Microtubule-associated protein;Microtubule-associated protein 4	1.4334	1.4334	NaN	NaN	1			3	0.11977	70.563	50.433
TQELLQEENR	Unmodified	1258.62	P35579	MYH9	Myosin-9	1.4364	1.3519	1.5261	NaN	1	1		2	1.44e-05	135.55	77.69
AINTEFKNTR	Unmodified	1192.62	P08670;B0YJC4;A0A1B0GTT5;A0A1B0GVG8	VIM	Vimentin	1.4367	2.3984	1.5269	1.2143	3	3	4	2;3	0.0087959	109.29	42.258
AFLASESLIKQIPR	Unmodified	1571.9	P62906	RPL10A	60S ribosomal protein L10a	1.4375	1.4198	1.76	1.3117	2	1	2	3	0.031236	101.39	49.449
KEGIPPDQQR	Unmodified	1166.6	J3QSA3;F5GZ39;M0R1V7;J3QS39;Q49A90;J3QTR3;M0R1M6;F5H6Q2;F5GYU3;F5H2Z3;M0R2S1;F5H265;B4DV12;F5H388;F5H747;F5GXK7;J3QKN0;Q5PY61;Q96C32;P62987;P62979;P0CG47;P0CG48	UBB;UBC;UBA52;RPS27A	Ubiquitin-60S ribosomal protein L40;Ubiquitin;60S ribosomal protein L40;Ubiquitin-40S ribosomal protein S27a;Ubiquitin;40S ribosomal protein S27a;Polyubiquitin-B;Ubiquitin;Polyubiquitin-C;Ubiquitin	1.4382	1.4382	1.2046	1.3943	1	1	1	3	0.014791	96.113	37.521
AKIDATSASVLASR	Unmodified	1388.76	P13667	PDIA4	Protein disulfide-isomerase A4	1.4409	NaN	NaN	1.4409			1	3	0.0027806	115.09	59.112
TVCLAKLHDR	Unmodified	1211.64	P02787	TF	Serotransferrin	1.4409	NaN	1.4409	NaN		1		3	0.074178	83.883	49.08
RSEDFGVNEDLADSDAR	Unmodified	1894.83	P04083	ANXA1	Annexin A1	1.4461	NaN	1.481	1.4119		1	1	3	0.06095	72.207	45.178
VDVSKPDLTAALR	Unmodified	1383.77	P08670;B0YJC4;B0YJC5	VIM	Vimentin	1.4486	1.6857	1.3223	1.5041	2	2	3	2;3	0.0084493	103.14	48.792
INLAAEPKVNR	Unmodified	1223.7	G3V5X6;G3V3K6;G3V251;G3V4W0;B4DY08;B2R5W2;G3V4C1;P07910-4;P07910-2;G3V555;G3V575;G3V2D6;G3V576;G3V2Q1;P07910;B4DSU6;A0A0G2JPF8;A0A0G2JNQ3;P0DMR1;O60812;B7ZW38;B2RXH8	HNRNPC;HNRNPCL4;HNRNPCL1;HNRNPCL3;HNRNPCL2	Heterogeneous nuclear ribonucleoproteins C1/C2;Heterogeneous nuclear ribonucleoprotein C-like 4;Heterogeneous nuclear ribonucleoprotein C-like 1;Heterogeneous nuclear ribonucleoprotein C-like 3;Heterogeneous nuclear ribonucleoprotein C-like 2	1.4489	1.4489	1.5055	1.1711	1	1	1	3	0.00075403	115.7	62.909
VLLESEQFLTELTR	Unmodified	1676.9	H0YLA2;P37108	SRP14	Signal recognition particle 14 kDa protein	1.4501	1.5629	1.7273	1.2142	2	1	3	2;3	4.1946e-19	187.58	117.48
VNFTVDQIR	Unmodified	1090.58	P13639	EEF2	Elongation factor 2	1.4524	1.4524	1.563	1.3387	1	1	1	2	3.8221e-13	164.68	66.054
KKAPDFVFYAPR	Unmodified	1437.78	P26038;P35241-4;P35241;P35241-5;E7EQR4;P15311	MSN;RDX;EZR	Moesin;Radixin;Ezrin	1.4559	NaN	1.2839	1.2122		2	1	3	0.085574	80.17	37.701
EEEMLENVSLVCPKDATR	Unmodified	2118.99	A8MUN2;P04114	APOB	Apolipoprotein B-100;Apolipoprotein B-48	1.4564	1.6843	NaN	1.2594	1		1	3	5.3009e-06	112.91	70.638
FIPGSDQLNVISCQGLAPSQGR	Unmodified	2343.16	A0A087X0S5;P12109	COL6A1	Collagen alpha-1(VI) chain	1.4564	1.4564	NaN	NaN	1			3	0.047734	55.972	13.267
AIQMTQSPSSLSASVGDR	Oxidation (M);Acetyl (N-term)	1891.89	A0A0C4DH72	IGKV1-6		1.4612	1.4612	NaN	NaN	1			2	0.054281	48.704	18.141
NPSYQGIWKPR	Unmodified	1344.69	P27824-3;P27824;P27824-2	CANX	Calnexin	1.462	1.3548	1.5014	1.4237	2	1	1	3	0.00078968	114.97	73.851
TTTAAAVASTGPSSR	Unmodified	1376.69	E7EVA0;P27816-5;P27816-2;P27816-6;P27816;H0Y2V1;H7C4C5;B5MEG9;F8W9U4;P27816-4	MAP4	Microtubule-associated protein;Microtubule-associated protein 4	1.4622	NaN	1.4622	NaN		1		2	0.011773	95.094	41.126
AAAETQSLR	Acetyl (N-term)	987.499	Q13523	PRPF4B	Serine/threonine-protein kinase PRP4 homolog	1.4623	1.4114	1.5151	NaN	1	1		2	9.2735e-05	131.03	48.791
GSTQVTVEEPVQQPSVVDR	Unmodified	2054.03	O60664-4;O60664-3;O60664;K7EJD0;K7ER39	PLIN3	Perilipin-3	1.465	NaN	1.3889	1.5452	2	1	1	2;3	0.00015062	163.99	91.339
TLETVPLER	Unmodified	1056.58	P22626;A0A087WUI2	HNRNPA2B1	Heterogeneous nuclear ribonucleoproteins A2/B1	1.4743	1.4743	1.4163	1.5158	1	1	1	2	0.008026	113.71	56.529
KSQIHDIVLVGGSTR	Unmodified	1608.89	E9PKE3;P11142;P11142-2;E9PNE6;E9PN89;A8K7Q2	HSPA8	Heat shock cognate 71 kDa protein	1.4748	1.4748	NaN	NaN	1			3	0.13712	68.576	29.778
EKLQEEMLQR	Unmodified	1302.66	P08670;B0YJC4	VIM	Vimentin	1.4779	1.4779	1.4403	1.8006	1	1	1	3	2.6303e-08	160.77	87.921
LPCQTELSVAQCTQR	Unmodified	1789.85	P12110	COL6A2	Collagen alpha-2(VI) chain	1.4792	1.4792	1.7061	1.4042	1	1	1	3	0.11693	70.529	12.999
SEGDSVGESVHGKPSVVYR	Acetyl (N-term)	2029.97	Q5T093;Q5T092;A0A0A0MR06;Q5T091;O15258	RER1	Protein RER1	1.4812	1.4812	1.4471	1.2839	1	1	1	3	0.00037682	69.805	53.831
SESKEFNAEVHR	Unmodified	1431.67	P46777	RPL5	60S ribosomal protein L5	1.4819	NaN	1.5906	1.3807		1	1	3	0.012137	101.39	90.485
ATKIDKEACR	Acetyl (N-term)	1232.62	Q14019	COTL1	Coactosin-like protein	1.4873	1.6946	1.4421	1.4297	1	2	4	2;3	6.9952e-08	57.55	46.398
GGDIINALCFSPNR	Unmodified	1532.74	H0Y8R5;H0YAF8;D6R9Z1;H0YAM7;D6RAC2;J3KPE3;H0Y8W2;D6R9L0;D6REE5;P63244;H0Y9P0;D6RF23	GNB2L1	Guanine nucleotide-binding protein subunit beta-2-like 1;Guanine nucleotide-binding protein subunit beta-2-like 1, N-terminally processed	1.488	1.3451	1.504	1.5028	1	1	2	2	2.0616e-18	184.55	107.17
LTEAPLNPKANR	Unmodified	1322.73	P63261;P60709;Q6S8J3;A6NL76;I3L3I0;I3L1U9;G5E9R0;C9JFL5;F6UVQ4;F6QUT6;E7EVS6;I3L3R2;J3KT65;Q9BYX7;I3L4N8;P0CG38;P0CG39;P63267;P68032;P62736;P68133;P63267-2	ACTG1;ACTB;POTEE;ACTA1;ACTG2;ACTA2;POTEKP;POTEI;POTEJ;ACTC1	Actin, cytoplasmic 2;Actin, cytoplasmic 2, N-terminally processed;Actin, cytoplasmic 1;Actin, cytoplasmic 1, N-terminally processed;POTE ankyrin domain family member E;Putative beta-actin-like protein 3;Putative beta-actin-like protein 3, N-terminally processed;POTE ankyrin domain family member I;POTE ankyrin domain family member J;Actin, gamma-enteric smooth muscle;Actin, alpha cardiac muscle 1;…	1.491	2.0326	1.0937	NaN	1	1		3	0.051292	88.056	52.113
GAGAEEVLAPLR	Unmodified	1181.64	P41250;F8WCK4	GARS	Glycine--tRNA ligase	1.4914	1.6546	1.4914	1.4332	1	1	1	2	3.1959e-11	176.38	128.51
ALLSGDTQTDATSFYDR	Unmodified	1859.85	K7ELL7;P14314-2;P14314	PRKCSH	Glucosidase 2 subunit beta	1.4916	1.4916	1.3241	1.6793	2	2	2	2	1.1924e-14	179.46	132.03
NLAEDIMR	Unmodified	960.47	P08670;B0YJC4	VIM	Vimentin	1.494	1.511	1.4773	NaN	1	1		2	0.044506	104.75	48.2
VKTTDGYLLR	Unmodified	1164.65	D6RED7;D6RAS7;H0Y8L7;D6RB09;E9PFI5;D6RG13;D6RAT0;P61247;H0Y9Y4;D6R9B6	RPS3A	40S ribosomal protein S3a	1.4955	1.4955	1.4039	1.7206	2	1	1	3	0.0069567	110.53	62.443
QQEVISPDTTER	Unmodified	1401.67	P12110;P12110-3;P12110-2;C9JH44	COL6A2	Collagen alpha-2(VI) chain	1.4962	1.4775	1.4962	1.8859	1	1	1	2	0.001007	138.22	52.543
RDQYELLCLDNTR	Unmodified	1694.8	P02787;C9JVG0	TF	Serotransferrin	1.4985	1.4985	1.3227	1.5183	1	1	1	3	0.10805	74.789	62.234
AQVAAEILEIADTPSGDKTSLETR	Unmodified	2514.28	P08133-2;P08133;E7EMC6	ANXA6	Annexin A6;Annexin	1.5019	1.5191	1.4956	1.5019	1	1	1	3	6.4826e-41	186.9	151.98
VFAVENGFKALR	Acetyl (N-term)	1391.76	A0A087WVD6;A0A087WXZ5;A0A087WVT0;A6NF34	ANTXRL	Anthrax toxin receptor-like	1.5037	NaN	1.2898	1.753		1	1	3	0.050853	59.84	10.56
YQKSTELLIR	Unmodified	1249.7	Q71DI3;Q16695;P68431;Q5TEC6	HIST2H3A;HIST3H3;HIST1H3A;HIST2H3PS2	Histone H3.2;Histone H3.1t;Histone H3.1;Histone H3	1.5045	1.6383	NaN	1.3816	1		1	3	0.12446	77.744	6.243
RTVSVGLQTDPPR	Unmodified	1424.77	H0YDM2;O94964-3;O94964;O94964-2	SOGA1	Protein SOGA1;N-terminal form;C-terminal 80 kDa form	1.5059	NaN	1.4673	1.5455		1	1	2	0.054736	86.898	42.549
ALKGTNESLER	Unmodified	1216.64	P08670;B0YJC4;B0YJC5	VIM	Vimentin	1.5093	1.5967	1.5627	1.4117	2	2	4	2;3	8.1589e-18	181.87	85.84
SATETLSEEEQEELR	Unmodified	1749.79	E5RFR7;H0YC44;H0YC42;P55327-8;P55327-2;P55327-4;P55327;P55327-7;P55327-5;P55327-6;P55327-3	TPD52	Tumor protein D52	1.5136	1.5136	NaN	NaN	1			2	0.0059215	132.79	75.005
GESSELDLQGIR	Unmodified	1302.64	F8W031;F8W1K5;F8VXJ7;Q9Y2B0;H0YI18	CNPY2	Protein canopy homolog 2	1.5161	1.5161	NaN	NaN	1			2	0.13753	73.067	22.783
GEFVSETESR	Unmodified	1139.51	P02671-2;P02671	FGA	Fibrinogen alpha chain;Fibrinopeptide A;Fibrinogen alpha chain	1.5177	1.5177	1.3897	1.5649	1	1	1	2	0.014222	101.9	23.974
THEYHAETIKNVR	Unmodified	1596.8	H3BTN5;P14618-2;P14618;H3BT25;H3BUW1;H3BTJ2;H3BQ34	PKM	Pyruvate kinase;Pyruvate kinase PKM	1.5203	1.5203	NaN	NaN	1			4	0.0081084	105.36	69.074
RKPKAEEDEILNR	Unmodified	1596.86	P27824-3;P27824;P27824-2	CANX	Calnexin	1.5221	1.5569	1.4881	1.4904	1	1	2	3	0.0088008	122.46	60.424
GTYHGDSDLQLER	Unmodified	1489.68	P68371;P04350;M0R0X0;M0QY85;M0QY37;M0QX14;M0QZL7;M0R278;M0R2D3;M0QYM7	TUBB4B;TUBB4A	Tubulin beta-4B chain;Tubulin beta-4A chain	1.5256	1.5256	1.3236	1.2152	1	1	1	3	0.0020549	151.66	121.18
EVLVAGFGR	Unmodified	946.524	D6RD47;P62266	RPS23	40S ribosomal protein S23	1.5282	1.7709	NaN	1.3187	1		1	2	0.092533	86.953	42.506
AYQHRLSETR	Unmodified	1259.64	E7ENN3;A0A0C4DG40;Q8NF91-7;Q8NF91-4;Q8NF91	SYNE1	Nesprin-1	1.5297	NaN	NaN	1.5297			1	2	0.023912	95.815	51.698
DIQLTQSPSSLSASVGDR	Unmodified	1859.92	A0A075B6S9	IGKV1D-37		1.5312	1.3037	1.7984	NaN	4	1	2	2	1.7113e-05	102.73	43.185
SDYPPLGR	Unmodified	903.445	A0A087WVQ9;P68104-2;Q5VTE0;P68104	EEF1A1;EEF1A1P5	Elongation factor 1-alpha 1;Putative elongation factor 1-alpha-like 3	1.5312	1.5312	1.4889	1.5842	1	1	1	2	0.043047	124.89	124.89
LASVDFQHASEDAR	Unmodified	1544.72	P30740	SERPINB1	Leukocyte elastase inhibitor	1.5367	1.5367	1.8921	1.5349	1	1	2	3	0.10355	85.837	39.485
VLTLLESER	Unmodified	1058.6	P62857	RPS28	40S ribosomal protein S28	1.541	NaN	1.5339	1.548		1	1	2	0.15611	78.77	26.134
DVIELTPSNFNR	Unmodified	1403.7	Q15084-3;Q15084;Q15084-4;Q15084-5;Q15084-2	PDIA6	Protein disulfide-isomerase A6	1.5499	1.5499	1.654	1.4545	1	1	1	2	8.525e-35	196.52	117.04
VSKPDLTAALR	Unmodified	1169.68	P08670;B0YJC4;B0YJC5	VIM	Vimentin	1.5505	1.5078	1.5505	1.5681	2	1	1	3	0.0005262	122.55	62.07
AGLNSLEAVKR	Acetyl (N-term)	1198.67	P67936	TPM4	Tropomyosin alpha-4 chain	1.5513	1.5513	1.6277	1.4816	1	1	1	2	1.5418e-72	113.71	63.58
MKHYEVEILDAKTR	Unmodified	1731.9	M0R3C3;Q9NZ01-2;Q9NZ01	TECR	Very-long-chain enoyl-CoA reductase	1.5558	1.3482	2.1061	1.5558	1	1	1	3;4	0.008094	109.07	65.757
STEIDQDTINR	Unmodified	1290.61	P12110;P12110-3;P12110-2	COL6A2	Collagen alpha-2(VI) chain	1.5619	1.6626	NaN	1.4673	1		1	2	0.00055777	123.21	40.458
AETLEFNDVYQEVKGSMNDGR	Acetyl (N-term)	2443.1	Q08945	SSRP1	FACT complex subunit SSRP1	1.5635	1.7715	1.3799	NaN	1	1		3	0.0019817	62.658	46.359
EIVLTQSPATLSLSPGER	Unmodified	1897.02	A0A0A0MRZ8;A0A0C4DH25;P04433	IGKV3D-11;IGKV3D-20	Ig kappa chain V-III region VG	1.5711	1.5762	1.5237	1.6328	3	2	3	2;3	6.3816e-18	231.07	161.42
APSEQALLSLVPVQR	Unmodified	1606.9	P02730-2;P02730	SLC4A1	Band 3 anion transport protein	1.5727	1.5727	NaN	NaN	1			3	0.056064	86.498	41.934
EDMDGEWEAPQIANPR	Unmodified	1856.8	P27824-3;P27824;P27824-2;D6RGY2	CANX	Calnexin	1.5798	1.8051	NaN	1.3827	2	3	2	2	3.7961e-11	148.68	106.99
TGDIIIDGGNSEYR	Unmodified	1508.71	K7EMN2;K7EM49;P52209-2;P52209	PGD	6-phosphogluconate dehydrogenase, decarboxylating	1.581	1.4946	1.6725	NaN	2	1		2	0.0070897	105.46	55.42
GADCIMLSGETAKGDYPLEAVR	Unmodified	2352.11	H3BTN5;P14618-2;P14618;P14618-3;H3BR70;B4DNK4	PKM	Pyruvate kinase;Pyruvate kinase PKM	1.5885	1.478	1.7326	1.5148	1	2	3	3	1.8052e-33	181.34	134.35
EKALIEILATR	Unmodified	1255.75	E5RK69;P08133-2;P08133;E7EMC6	ANXA6	Annexin;Annexin A6	1.5909	1.5909	NaN	NaN	1			3	0.056826	86.911	55.489
AATGANAEKAESHNDCPVR	Acetyl (N-term)	2038.91	C9K0J2;F8WD51;C9J486;C9JIP2;B4DND0;Q16831	UPP1	Uridine phosphorylase 1	1.5931	1.6527	1.4698	1.3659	1	1	1	3	0.00085536	69.188	35.094
DALSQLMNGPIR	Unmodified	1313.68	Q9HB40	SCPEP1	Retinoid-inducible serine carboxypeptidase	1.5938	1.4099	1.607	1.3996	1	1	1	2	3.0407e-07	170.5	110.57
SEVPGAAAEGSGGSGVGIGDR	Unmodified	1828.86	H0YDT8;Q9NPA0	EMC7	ER membrane protein complex subunit 7	1.6036	NaN	1.6036	1.641		2	3	2	2.3249e-09	105.46	64.985
IASTPHELYR	Unmodified	1185.61	P12110;P12110-3;P12110-2	COL6A2	Collagen alpha-2(VI) chain	1.6071	1.573	1.8531	1.6071	1	1	1	3	0.039121	90.827	44.826
TVEKTVAPTECS	Unmodified	1320.62	P0DOY3;P0DOY2;A0A0B4J231;P0CG04;B9A064	IGLL5;IGLC1	Ig lambda-1 chain C regions;Immunoglobulin lambda-like polypeptide 5	1.6162	1.8608	NaN	1.4038	1		1	2	0.0054012	120.27	77.408
EVQLVETGGGLIQPGGSLR	Unmodified	1909.03	P01767		Ig heavy chain V-III region BUT	1.619	1.7542	1.4205	1.6943	5	3	3	2;3	0.0015911	112.15	40.606
EENLTQENQDR	Unmodified	1374.6	G3V595;P01011-3;P01011-2;P01011	SERPINA3	Alpha-1-antichymotrypsin;Alpha-1-antichymotrypsin His-Pro-less	1.6199	1.6199	1.4207	1.7378	1	1	1	2	0.0006487	139.43	82.886
AAEGSPGTPDESTPPPR	Unmodified	1664.76	H0YLI4;Q14696-2;Q14696	MESDC2	LDLR chaperone MESD	1.6208	1.6208	1.4913	1.8802	1	3	2	2;3	6.3996e-71	216.83	146.42
AKISSPTETER	Acetyl (N-term)	1259.64	P31949	S100A11	Protein S100-A11;Protein S100-A11, N-terminally processed	1.6212	1.5775	1.6661	0.97106	3	1	1	2	9.3768e-124	129.42	55.249
KAVGSISSTAFDIR	Acetyl (N-term)	1492.79	I3L2B0;K7EIG1;O75153	CLUH	Clustered mitochondria protein homolog	1.6264	1.6264	1.7077	1.5884	1	1	1	3	0.0098809	56.295	15.186
ATDVNDALGYVTR	Unmodified	1393.68	A0A087X0S5;P12109	COL6A1	Collagen alpha-1(VI) chain	1.6273	1.6273	1.6097	1.7846	1	1	1	2	0.0081089	108.98	103.2
EEDKEEDEEEDVPGQAKDEL	Unmodified	2331.97	P27797	CALR	Calreticulin	1.6286	1.6654	1.5667	1.6286	1	1	1	3	0.03232	63.998	45.94
FFEDLEPFR	Unmodified	1198.57	P27824-3;P27824;P27824-2	CANX	Calnexin	1.6297	1.6297	NaN	NaN	1			2	0.058016	91.853	51.502
QQKLQALKDTANR	Unmodified	1512.84	P29401;P29401-2;F8WAX4;F8W888;E9PFF2	TKT	Transketolase	1.6326	1.6326	NaN	NaN	1			3	0.11131	74.392	51.214
AALAVLEDR	Unmodified	956.529	P40306;J3QL48;J3QQN1	PSMB10	Proteasome subunit beta type-10	1.6361	1.826	1.4866	1.6361	1	1	1	2	0.088827	87.476	31.8
GVNDNEEGFFSAR	Unmodified	1440.63	P02675	FGB	Fibrinogen beta chain;Fibrinopeptide B;Fibrinogen beta chain	1.6367	1.7884	1.6074	1.6429	2	1	1	2	0.0083093	143.24	91.289
DIVMTQSPLSLPVTPGEPASISCR	Oxidation (M)	2570.27	A0A075B6P5;P01615	IGKV2D-28	Ig kappa chain V-II region FR	1.638	1.5292	1.5192	1.6549	1	1	1	3	4.1536e-09	110.6	82.638
EVQLVESGGGLVQPGGSLR	Unmodified	1881	A0A0B4J1X5;S4R460;A0A0B4J2B5;S4R3C0;A0A075B7F1;A0A0J9YX35;A0A0C4DH35;A0A0C4DH30;A0A075B7E8;A0A0B4J1Y9;A0A075B7D8;P01766;P01780;P01764;P01763	IGHV3-74;IGHV3OR16-9;IGHV3OR16-8;IGHV3-35;IGHV3-16;IGHV3OR16-13;IGHV3-72;IGHV3OR15-7;IGHV3-23	Ig heavy chain V-III region BRO;Ig heavy chain V-III region JON;Ig heavy chain V-III region 23;Ig heavy chain V-III region WEA	1.6388	1.5807	1.6388	1.8828	9	4	8	2;3	8.7267e-267	330.35	191.03
GSQSVVEVPYAR	Unmodified	1290.66	F8W031;F8W1K5;F8VXJ7;Q9Y2B0	CNPY2	Protein canopy homolog 2	1.6407	1.6407	1.3822	1.7544	1	1	1	2	8.5141e-05	155.33	87.437
AAPEASGTPSSDAVSR	Unmodified	1501.7	P31146	CORO1A	Coronin-1A	1.6416	1.6726	1.6183	1.5156	2	2	2	2	5.4693e-22	172.11	99.79
SLAVSLGER	Unmodified	930.513	P06312	IGKV4-1	Ig kappa chain V-IV region	1.6424	1.6424	1.6029	1.8123	1	1	1	2	0.00014342	137.9	45.434
EEESLNEVGYDDIGGCR	Unmodified	1940.81	P55072	VCP	Transitional endoplasmic reticulum ATPase	1.6446	NaN	1.6446	NaN		1	1	2	5.023e-15	163.99	102.65
LGVLCPTGCQLQEALLQQER	Unmodified	2312.16	P02675	FGB	Fibrinogen beta chain;Fibrinopeptide B;Fibrinogen beta chain	1.6446	0.9712	2.7849	NaN	1	1		3	0.011071	61.181	29.089
SSSEQGPGPAAALGR	Unmodified	1383.67	Q5SXM7;Q5SXM8	DNLZ	DNL-type zinc finger protein	1.6501	1.6501	NaN	NaN	1			2	0.019516	90.614	60.296
SYSCQVTHEGSTVEKTVAPTECS	Unmodified	2556.11	P0DOY3;P0DOY2;A0A0B4J231;P0CG04;B9A064	IGLL5;IGLC1	Ig lambda-1 chain C regions;Immunoglobulin lambda-like polypeptide 5	1.6515	1.562	1.6515	1.4151	1	1	1	3	8.2153e-09	93.851	68.269
HPNSPLDEENLTQENQDR	Unmodified	2134.95	G3V595;P01011-3;P01011-2;P01011	SERPINA3	Alpha-1-antichymotrypsin;Alpha-1-antichymotrypsin His-Pro-less	1.6524	1.6156	1.7621	1.5524	3	1	1	2;3	0.0009475	103.99	84.931
VLTTLSLGDR	Unmodified	1073.61	P12110	COL6A2	Collagen alpha-2(VI) chain	1.6538	1.8054	1.5149	NaN	1	1		2	0.14016	76.1	17.183
ALSSDTSGHFR	Unmodified	1176.55	E5RK69;P08133-2;P08133;E7EMC6	ANXA6	Annexin;Annexin A6	1.6599	1.6599	1.691	1.5116	1	1	1	3	3.1284e-59	215.06	175.51
QSSATSSFGGLGGGSVR	Unmodified	1553.74	CON__P08727;P08727;C9JM50	KRT19	Keratin, type I cytoskeletal 19	1.66	1.513	1.66	1.8897	1	1	1	2	0.00014738	135.91	73.746	+
LQKSVEEEEQVWR	Unmodified	1658.83	A0A087WVV2;A0A0A0MRV0;Q9P2E9-2;Q9P2E9;F8W7S5;Q9P2E9-3;A0A087WU26	RRBP1	Ribosome-binding protein 1	1.6605	2.0737	NaN	1.3296	1		1	3	0.038566	101.32	66.017
GEWEAPQIANPR	Unmodified	1366.66	P27824-3;P27824;P27824-2;D6RGY2	CANX	Calnexin	1.6649	1.9682	1.6551	1.6212	2	2	2	2;3	4.9794e-18	187.22	129.36
EIQNMKEEMAR	Unmodified	1377.64	P08670;B0YJC4;B0YJC5	VIM	Vimentin	1.6653	1.7662	1.6323	1.6989	2	3	1	2;3	7.3213e-07	160.67	82.562
GSTIVPGEQGAEYQHFIQQCTDDVR	Unmodified	2834.29	Q14019	COTL1	Coactosin-like protein	1.6674	1.6674	NaN	NaN	1			3	1.1366e-13	91.883	78.695
GLVETPTGYIESLPR	Unmodified	1630.86	F8VRJ2;H0YHC3;F8W020;F8W118;F8VXI6;F8VUX1;F8VY35;F8VV59;B7Z9C2;F8W0J6;F5H4R6;H0YIV4;P55209-3;P55209-2;P55209	NAP1L1	Nucleosome assembly protein 1-like 1	1.6713	1.6541	1.6532	2.0003	2	2	2	2;3	0.008432	124.12	110.46
TVEEDLGKSR	Unmodified	1132.57	P14625;Q96GW1;A0A1W2PRR1;F8VPC7	HSP90B1	Endoplasmin	1.6716	NaN	1.7772	1.5723		1	1	3	4.0274e-08	147.75	65.782
DIDLSDVELDDLGKDEL	Unmodified	1902.89	Q15084-3;Q15084;Q15084-4;Q15084-5;Q15084-2	PDIA6	Protein disulfide-isomerase A6	1.6749	2.4926	1.3866	1.893	2	2	1	2	7.44e-254	271.01	202.87
GLSLPFGWTPSR	Unmodified	1316.69	P11678	EPX	Eosinophil peroxidase;Eosinophil peroxidase light chain;Eosinophil peroxidase heavy chain	1.6758	1.7667	1.6758	1.6581	1	1	1	2	0.029772	93.556	43.841
AVTLDKDAYYR	Acetyl (N-term)	1355.67	G3V5A4;G3V401;G3V2X0;Q9Y5B9	SUPT16H	FACT complex subunit SPT16	1.677	1.8409	1.677	1.5156	1	1	1	2	5.7141e-05	93.178	35.588
SSLQAPVVSTVGMQR	Unmodified	1558.81	CON__P35900;P35900	KRT20	Keratin, type I cytoskeletal 20	1.677	NaN	1.8123	1.5517		1	1	2	0.081942	83.182	26.823	+
AEDDCGNDFQCSTGR	Unmodified	1730.63	P02748	C9	Complement component C9;Complement component C9a;Complement component C9b	1.6804	NaN	NaN	1.6804	1		1	2	0.0010568	148.89	107.73
GADGDLADLHR	Unmodified	1138.54	E7ENL6;P12111-4;P12111-2;P12111	COL6A3	Collagen alpha-3(VI) chain	1.6815	1.7813	1.5874	1.5264	1	1	1	3	0.00057737	123.62	72.426
WDEDMDGEWEAPQIANPR	Unmodified	2157.91	P27824-3;P27824;P27824-2;D6RGY2	CANX	Calnexin	1.6871	1.8553	NaN	1.5341	1		1	2	0.05025	69.602	62.89
DIVMTQSPDSLAVSLGER	Oxidation (M)	1932.95	P06312	IGKV4-1	Ig kappa chain V-IV region	1.7175	1.7358	1.7959	1.5733	2	3	3	2;3	1.2218e-09	143.38	61.883
LFVGSQATDFGEALVR	Unmodified	1708.88	O43852-2;O43852-4;O43852;O43852-3;H0Y875;O43852-15;O43852-8;O43852-9;O43852-5;O43852-6	CALU	Calumenin	1.7294	1.7294	NaN	NaN	1			2	0.0084508	98.407	59.603
AKLTNEDSQNR	Acetyl (N-term)	1316.63	C9JYJ6;Q4L180-5;Q4L180-3;Q4L180-7;Q4L180-2;Q4L180	FILIP1L	Filamin A-interacting protein 1-like	1.7349	1.7349	NaN	NaN	1	1	1	2	7.9591e-13	94.309	37.876
MAKLEECVR	Unmodified	1134.55	P24534	EEF1B2	Elongation factor 1-beta	1.7349	NaN	NaN	1.7349			1	3	0.14627	79.986	61.313
NQGGYGGSSSSSSYGSGR	Unmodified	1693.69	F8W6I7;P09651-3;P09651-2;P09651;H0YH80	HNRNPA1	Heterogeneous nuclear ribonucleoprotein A1;Heterogeneous nuclear ribonucleoprotein A1, N-terminally processed	1.7361	1.4881	2.0084	1.807	4	2	1	2	2.277e-33	168	118.7
EVQLVESGGGLIQPGGSLR	Unmodified	1895.01	A0A0C4DH42	IGHV3-66		1.7364	1.2867	1.833	1.9849	6	6	4	2;3	4.7472e-49	195.94	129.4
SCQVTHEGSTVEKTVAPTECS	Unmodified	2306.02	P0DOY3;P0DOY2;A0A0B4J231;P0CG04;B9A064	IGLL5;IGLC1	Ig lambda-1 chain C regions;Immunoglobulin lambda-like polypeptide 5	1.7412	1.7412	NaN	NaN	1			3	0.082037	63.639	25.062
DLSDLNAVQMESVR	Unmodified	1575.76	U3KQM0;O15173;O15173-2	PGRMC2	Membrane-associated progesterone receptor component 2	1.7488	1.3604	NaN	1.7986	2		1	2	0.0092235	142.97	53.797
EDTIIDIITHR	Unmodified	1324.7	E5RK69;P08133-2;P08133	ANXA6	Annexin;Annexin A6	1.753	1.7568	1.6906	1.6112	1	2	1	3	3.8118e-07	150.04	133.51
MDFGNDFVPPAPR	Unmodified	1461.67	Q9NQC3-2;Q9NQC3-5;Q9NQC3;F8W914	RTN4	Reticulon-4;Reticulon	1.7571	1.6884	2.1457	1.6879	1	2	3	2	0.0083439	127.51	61.324
TLEDQANEYR	Unmodified	1237.56	P13533	MYH6	Myosin-6	1.759	NaN	2.5635	1.2069		1	1	2	0.030962	93.162	36.441
LSDVELDDLGKDEL	Unmodified	1559.76	Q15084-3;Q15084;Q15084-4;Q15084-5;Q15084-2	PDIA6	Protein disulfide-isomerase A6	1.7607	1.7931	1.676	1.6708	2	2	2	2;3	0.0028794	155.48	126.75
VIELTPSNFNR	Unmodified	1288.68	Q15084-3;Q15084;Q15084-4;Q15084-5;Q15084-2	PDIA6	Protein disulfide-isomerase A6	1.7663	1.7663	NaN	1.6556	2		3	2	2.6491e-22	168.26	90.11
TEAPLNPKANR	Unmodified	1209.65	P63261;P60709;Q6S8J3;A6NL76;I3L3I0;I3L1U9;G5E9R0;C9JFL5;F6UVQ4;F6QUT6;E7EVS6;I3L3R2;J3KT65;Q9BYX7;I3L4N8;P0CG38;P0CG39;P63267;P68032;P62736;P68133;P63267-2	ACTG1;ACTB;POTEE;ACTA1;ACTG2;ACTA2;POTEKP;POTEI;POTEJ;ACTC1	Actin, cytoplasmic 2;Actin, cytoplasmic 2, N-terminally processed;Actin, cytoplasmic 1;Actin, cytoplasmic 1, N-terminally processed;POTE ankyrin domain family member E;Putative beta-actin-like protein 3;Putative beta-actin-like protein 3, N-terminally processed;POTE ankyrin domain family member I;POTE ankyrin domain family member J;Actin, gamma-enteric smooth muscle;Actin, alpha cardiac muscle 1;…	1.7696	2.0256	1.9354	1.529	3	2	4	2;3	4.1214e-06	127.56	48.096
QQEEKMWR	Oxidation (M)	1149.52	A0A0G2JRP8;A0A0G2JP21;A0A087WU96;A0A087X1J6;A0A087X0V3;Q8N7Z2;A8MZA4;H0YM25	GOLGA6L1;GOLGA6L22;GOLGA6L6	Golgin subfamily A member 6-like protein 1;Putative golgin subfamily A member 6-like protein 6;Golgin subfamily A member 6-like protein 22	1.773	1.7747	1.3183	NaN	1	2		2	0.05225	101.33	36.907
NIQGITKPAIR	Unmodified	1209.72	P62805	HIST1H4A	Histone H4	1.7761	1.8265	1.7435	1.7867	2	3	2	2;3	0.026054	96.171	23.687
AAAAAAGAGPEMVR	Oxidation (M);Acetyl (N-term)	1299.62	P28482-2;P28482	MAPK1	Mitogen-activated protein kinase 1	1.7776	1.7776	NaN	NaN	3			2	0.051459	38.875	17.502
ALSSVQESQVAQQAR	Unmodified	1600.82	B0YIW2;P02656	APOC3	Apolipoprotein C-III	1.7786	1.7794	1.4151	NaN	2	2		2;3	4.0731e-12	194.96	154.46
VSGYPTLKIFR	Unmodified	1279.73	P30101;H7BZJ3;P13667	PDIA3;PDIA4	Protein disulfide-isomerase A3;Protein disulfide-isomerase A4	1.7808	2.0042	1.6688	1.7808	3	1	1	3	2.9268e-06	131.82	66.999
GMVALLDYR	Unmodified	1036.54	E9PJF7;Q5W0H4;A0A0B4J2C3;P13693;H0YCX0;J3KPG2;P13693-2	TPT1	Translationally-controlled tumor protein	1.7907	1.8122	1.7695	1.7812	1	1	2	2	8.9821e-05	140.09	80.844
ALNQATSQVESKQNAELAKLR	Unmodified	2298.23	A0A087WVV2;A0A0A0MRV0;Q9P2E9-2;Q9P2E9;F8W7S5;Q9P2E9-3	RRBP1	Ribosome-binding protein 1	1.7915	NaN	1.7915	NaN		1		4	0.030257	70.907	46.313
EEMDGEWEPPVIQNPEYKGEWKPR	Unmodified	2942.35	P27797;K7EJB9;K7EL50	CALR	Calreticulin	1.7937	1.8256	1.76	1.962	1	2	1	3;4	1.0371e-11	123.58	102.56
FGQGGAGPVGGQGPR	Unmodified	1340.66	P23246	SFPQ	Splicing factor, proline- and glutamine-rich	1.7969	1.2465	NaN	2.5904	1		1	2	0.012069	94.692	42.202
AKVYVAKVDCTAHSDVCSAQGVR	Unmodified	2520.22	Q8NBS9-2;Q8NBS9	TXNDC5	Thioredoxin domain-containing protein 5	1.7976	NaN	NaN	1.7976			1	4	0.0047576	71.148	53.553
GVILGADTR	Unmodified	900.503	P40306	PSMB10	Proteasome subunit beta type-10	1.7996	1.818	1.5402	1.7996	1	1	1	2	0.075924	89.296	12.449
SFVNDIFER	Unmodified	1125.55	U3KQK0;Q99880;Q99879;Q99877;Q93079;Q8N257;Q5QNW6;Q16778;P62807;P58876;P57053;P33778;P23527;P06899;O60814;Q5QNW6-2	HIST1H2BN;HIST1H2BL;HIST1H2BM;HIST1H2BH;HIST3H2BB;HIST2H2BF;HIST2H2BE;HIST1H2BC;HIST1H2BD;H2BFS;HIST1H2BB;HIST1H2BO;HIST1H2BJ;HIST1H2BK	Histone H2B;Histone H2B type 1-L;Histone H2B type 1-M;Histone H2B type 1-N;Histone H2B type 1-H;Histone H2B type 3-B;Histone H2B type 2-F;Histone H2B type 2-E;Histone H2B type 1-C/E/F/G/I;Histone H2B type 1-D;Histone H2B type F-S;Histone H2B type 1-B;Histone H2B type 1-O;Histone H2B type 1-J;Histone H2B type 1-K	1.8107	1.9002	1.7255	NaN	1	1		2	0.026517	97.635	51.619
AVTVAPPGAR	Unmodified	937.535	A0A1W2PP35;A0A1X7SBS1;A0A1W2PPS1;Q00839-2;Q00839;A0A1W2PP22	HNRNPU	Heterogeneous nuclear ribonucleoprotein U	1.8118	2.3782	1.8118	1.6623	1	1	1	2	0.024108	95.741	37.782
GSALYTGSALDFVR	Unmodified	1455.74	E7ENL6;P12111-4;P12111-2;P12111;P12111-3;P12111-5;C9JNG9	COL6A3	Collagen alpha-3(VI) chain	1.8184	1.8184	1.8227	1.6491	1	1	1	2	0.00047221	143.79	97.792
GHVTGSPCGGIKLQAER	Unmodified	1765.89	P12110;P12110-3;P12110-2;C9JH44	COL6A2	Collagen alpha-2(VI) chain	1.8186	1.8186	NaN	NaN	1			3	0.0051239	94.339	49.914
EAPLNPKANR	Unmodified	1108.6	P63261;P60709;Q6S8J3;A6NL76;I3L3I0;I3L1U9;G5E9R0;C9JFL5;F6UVQ4;F6QUT6;E7EVS6;I3L3R2;J3KT65;Q9BYX7;I3L4N8;P0CG38;P0CG39;P63267;P68032;P62736;P68133;P63267-2	ACTG1;ACTB;POTEE;ACTA1;ACTG2;ACTA2;POTEKP;POTEI;POTEJ;ACTC1	Actin, cytoplasmic 2;Actin, cytoplasmic 2, N-terminally processed;Actin, cytoplasmic 1;Actin, cytoplasmic 1, N-terminally processed;POTE ankyrin domain family member E;Putative beta-actin-like protein 3;Putative beta-actin-like protein 3, N-terminally processed;POTE ankyrin domain family member I;POTE ankyrin domain family member J;Actin, gamma-enteric smooth muscle;Actin, alpha cardiac muscle 1;…	1.8234	2.09	1.6896	1.8234	1	1	1	3	8.6858e-05	128.38	40.014
SGGTTMYPGIADR	Unmodified	1324.61	P63261;P60709;A6NL76;P63267;P68032;P62736;P68133;P63267-2	ACTG1;ACTB;ACTA1;ACTG2;ACTC1;ACTA2	Actin, cytoplasmic 2;Actin, cytoplasmic 2, N-terminally processed;Actin, cytoplasmic 1;Actin, cytoplasmic 1, N-terminally processed;Actin, gamma-enteric smooth muscle;Actin, alpha cardiac muscle 1;Actin, aortic smooth muscle;Actin, alpha skeletal muscle	1.8234	1.8234	1.8316	1.6112	1	1	1	2	0.0018066	152.7	100.21
DIVMTQSPLSLPVTPGEPASISCR	Unmodified	2554.28	A0A075B6P5;P01615	IGKV2D-28	Ig kappa chain V-II region FR	1.8312	1.8312	1.6578	1.583	3	1	2	2;3	7.004e-09	106.69	106.16
GSEVGVGGAQVTGSNTR	Unmodified	1574.76	H7C399;A0A087WTG3;Q13618-3;Q13618-2;Q13618	CUL3	Cullin-3	1.8349	NaN	NaN	1.8349			1	2	0.013715	115.12	62.63
AVITVPVFFNQAER	Unmodified	1589.86	A0A087X054;Q9Y4L1;E9PJ21;A0A087WWI4;K7EQK2;Q9Y4L1-2;J3QL06;J3KTF1	HYOU1	Hypoxia up-regulated protein 1	1.8371	1.9076	1.8371	1.7597	1	1	1	2	0.11908	71.03	20.923
LYSSSDDVIELTPSNFNR	Unmodified	2055.97	Q15084-3;Q15084;Q15084-4;Q15084-5;Q15084-2	PDIA6	Protein disulfide-isomerase A6	1.8444	1.8794	1.8625	1.7955	3	2	3	2;3	1.6957e-299	350.9	289.08
SVNEPCSQPSGDR	Unmodified	1431.6	O94804	STK10	Serine/threonine-protein kinase 10	1.8485	1.6436	2.0789	NaN	1	1		2	0.039989	100.88	43.329
AQDVQASQAEADQQQTR	Unmodified	1872.86	A0A087WVV2;A0A0A0MRV0;Q9P2E9-2;Q9P2E9;F8W7S5;Q9P2E9-3	RRBP1	Ribosome-binding protein 1	1.8506	1.8506	1.6844	1.9413	2	3	4	2;3	8.5914e-188	232.17	162.45
VSEPTTVAFDVR	Unmodified	1319.67	M0QYN0;Q969H8	MYDGF	Myeloid-derived growth factor	1.8549	1.8549	1.9761	1.8517	1	1	1	2	2.5092e-17	182.64	125.04
DVALEGVSHFFR	Unmodified	1375.69	P02792	FTL	Ferritin light chain	1.8683	1.9161	1.8216	2.0113	2	2	2	3	1.6739e-05	132.03	79.637
ASTAIDAPSNLR	Unmodified	1214.63	P02751-10;P02751-5;P02751-9;P02751-14;P02751-8;P02751-17;P02751-3;P02751;P02751-4;P02751-6;H0Y7Z1;P02751-12;P02751-13;P02751-11;P02751-7;P02751-15;H0Y4K8	FN1	Fibronectin;Anastellin;Ugl-Y1;Ugl-Y2;Ugl-Y3	1.8706	NaN	2.3666	1.4786		1	1	2	0.15844	70.977	28.69
DITDGNSEHLKR	Unmodified	1383.67	D6RDX1;D6RBV2;Q12907;D6RBH1	LMAN2	Vesicular integral-membrane protein VIP36	1.8707	1.766	1.8698	2.0427	1	2	1	3	0.0094576	125.97	57.435
DAPEEEDHVLVLR	Unmodified	1520.75	H7BZ94;P07237;I3L3P5;I3NI03;I3L3U6;I3L0S0;I3L1Y5;I3L514;I3L312	P4HB	Protein disulfide-isomerase	1.8717	1.9515	2.0526	1.7552	6	3	5	2;3	3.381e-48	206.49	147.34
ATVNQVLASR	Unmodified	1057.59	Q15084-3;Q15084;Q15084-4;Q15084-5;Q15084-2	PDIA6	Protein disulfide-isomerase A6	1.8813	1.9773	1.6869	1.5257	1	1	1	2	6.9694e-08	145.25	75.191
GEWEPPVIQNPEYKGEWKPR	Unmodified	2438.2	P27797;K7EJB9;K7EL50	CALR	Calreticulin	1.8847	1.8481	1.9259	1.8695	7	3	6	3;4	2.0712e-09	111.01	70.362
YLPTQQDVLR	Unmodified	1231.66	A0A087WVZ3;B1AM21;K7EL62;P50148;P29992	GNA11;GNAQ	Guanine nucleotide-binding protein G(q) subunit alpha;Guanine nucleotide-binding protein subunit alpha-11	1.8898	2.2744	1.8898	1.7344	1	1	1	2	0.025126	95.358	0
AANSSGQGFQNKNR	Acetyl (N-term)	1519.71	Q9NRY2-2;Q9NRY2	INIP	SOSS complex subunit C	1.8902	NaN	1.8902	NaN		1	1	2	0.0056097	104.42	60.466
IDLSDVELDDLGKDEL	Unmodified	1787.87	Q15084-3;Q15084;Q15084-4;Q15084-5;Q15084-2	PDIA6	Protein disulfide-isomerase A6	1.8924	1.8924	NaN	1.8654	2		2	2;3	4.2497e-08	168.98	102.93
EEEAQTPQAPR	Unmodified	1254.58	Q9P2K3;Q9P2K3-3	RCOR3	REST corepressor 3	1.8941	NaN	NaN	1.8941			1	2	0.039443	91.069	1.989
VQASQAEADQQQTR	Unmodified	1558.73	A0A087WVV2;A0A0A0MRV0;Q9P2E9-2;Q9P2E9;F8W7S5;Q9P2E9-3	RRBP1	Ribosome-binding protein 1	1.8974	1.9683	1.5394	NaN	2	1	2	2;3	1.0463e-206	269.44	207.63
ALAEGPGAEGPR	Unmodified	1123.56	M0R0K9;Q13263-2;Q13263	TRIM28	Transcription intermediary factor 1-beta	1.8979	1.9689	1.513	1.4325	1	1	1	2	0.18783	68.626	17.29
GVEVHNAKTKPR	Unmodified	1334.74	A0A0A0MS08;P01859;P01861;P01857;P01860	IGHG1;IGHG2;IGHG4;IGHG3	Ig gamma-2 chain C region;Ig gamma-4 chain C region;Ig gamma-1 chain C region;Ig gamma-3 chain C region	1.9009	1.9009	1.7106	1.6531	1	1	1	3	0.0069356	109.24	57.069
RTVIDYNGER	Unmodified	1221.61	H7BZ94;P07237;I3L0S0;H0Y3Z3	P4HB	Protein disulfide-isomerase	1.9161	1.8857	1.9161	1.9715	1	1	1	3	0.052203	88.134	36.372
DIVMTQSPDSLAVSLGER	Unmodified	1916.95	P06312	IGKV4-1	Ig kappa chain V-IV region	1.9222	1.8985	1.9407	1.9884	3	2	2	2;3	1.6081e-93	222.29	174.99
VLTVINQTQKENLR	Unmodified	1654.94	F2Z388;P42766	RPL35	60S ribosomal protein L35	1.9239	NaN	1.7306	2.1388		1	1	3	0.018826	92.856	49.177
EEQPPETAAQR	Unmodified	1254.58	G3V5B3;G3V3E6;Q96HE7;G3V503	ERO1L	ERO1-like protein alpha	1.9348	1.7855	2.0966	NaN	1	1		2	1.637e-06	145.72	79.65
EDEEDEEDKEEDEEEDVPGQAKDEL	Unmodified	2949.15	P27797	CALR	Calreticulin	1.9415	1.9673	1.9147	1.5391	1	1	1	3	2.4919e-06	81.949	54.868
TFTWTPSSGKSAVQGPPER	Unmodified	2032	P01876;A0A0G2JMB2;P01877	IGHA1;IGHA2	Ig alpha-1 chain C region;Ig alpha-2 chain C region	1.9445	1.9445	NaN	NaN	1			3	0.1701	55.589	39.823
FNPDADAKALR	Unmodified	1216.62	E5RK69;P08133-2;P08133	ANXA6	Annexin;Annexin A6	1.9483	NaN	1.9483	1.7353		1	2	3	0.11976	77.744	48.2
SSTQFNKGPSYGLSAEVKNR	Acetyl (N-term)	2211.09	K7ES69;A0A087X271;B4DDF4;B4DUT8;Q99439-2;Q99439	CNN2	Calponin;Calponin-2	1.9659	1.9659	NaN	NaN	1			3	0.018993	51.798	39.705
GTDVLFTGR	Unmodified	964.498	A0A140T971;Q5SSV3;Q5SRR8;O95865;H0Y7N1	DDAH2	N(G),N(G)-dimethylarginine dimethylaminohydrolase 2	1.9722	NaN	2.2429	1.7341		1	1	2	0.0058004	119.21	106.17
SDLKKSDIDEIVLVGGSTR	Unmodified	2031.08	P11021	HSPA5	78 kDa glucose-regulated protein	1.973	2.2105	1.973	1.7897	5	5	4	3;4	6.4636e-10	142.26	99.208
DGLVETPTGYIESLPR	Unmodified	1745.88	F8VRJ2;H0YHC3;F8W020;F8W118;F8VXI6;F8VUX1;F8VY35;F8VV59;B7Z9C2;F8W0J6;F5H4R6;H0YIV4;P55209-3;P55209-2;P55209	NAP1L1	Nucleosome assembly protein 1-like 1	1.9879	1.9879	NaN	NaN	1		1	2	0.067887	97.463	32.623
SSFDLDYDFQR	Unmodified	1391.6	G3V5X6;G3V3K6;G3V251;G3V4W0;B4DY08;B2R5W2;G3V4C1;P07910-4;P07910-2;G3V555;G3V575;G3V2D6;G3V576;G3V2Q1;P07910;G3V5V7;P07910-3	HNRNPC	Heterogeneous nuclear ribonucleoproteins C1/C2	1.9886	1.9886	NaN	NaN	1			2	0.0082552	106.88	73.084
AASSSSLEKSYELPDGQVITIGNER	Unmodified	2650.31	P63261;P60709;Q6S8J3;P63267;P68032;P62736;P68133;P63267-2	ACTG1;ACTB;POTEE;ACTG2;ACTC1;ACTA2;ACTA1	Actin, cytoplasmic 2;Actin, cytoplasmic 2, N-terminally processed;Actin, cytoplasmic 1;Actin, cytoplasmic 1, N-terminally processed;POTE ankyrin domain family member E;Actin, gamma-enteric smooth muscle;Actin, alpha cardiac muscle 1;Actin, aortic smooth muscle;Actin, alpha skeletal muscle	1.9918	1.8546	1.964	2.1426	4	2	1	3	2.0393e-17	126.97	107.94
ETDMAKLEECVR	Unmodified	1479.67	P24534	EEF1B2	Elongation factor 1-beta	2.0002	2.0002	1.8764	1.5908	1	1	1	3	0.16093	70.728	51.051
VSPTDCSAVEPEAEKALDLINKR	Unmodified	2541.27	P04196	HRG	Histidine-rich glycoprotein	2.0035	NaN	2.2171	1.87		2	2	4	1.3293e-08	104.84	73.084
SDNGELEDKPPAPPVR	Acetyl (N-term)	1761.85	Q13177	PAK2	Serine/threonine-protein kinase PAK 2;PAK-2p27;PAK-2p34	2.004	1.9768	2.0316	NaN	1	1		2	0.0072443	63.473	41.397
LKKSDIDEIVLVGGSTR	Unmodified	1829.03	P11021	HSPA5	78 kDa glucose-regulated protein	2.0107	NaN	1.9925	2.0399	1	2	3	3	0.00016326	131.18	63.858
AQEIADTPSGDKTSLETR	Unmodified	1917.93	E5RK69	ANXA6	Annexin	2.0121	2.0876	NaN	1.9394	1		1	3	0.0029611	92.427	48.382
SPVLIDFFEDTER	Unmodified	1566.76	P04196	HRG	Histidine-rich glycoprotein	2.0164	1.979	2.0544	NaN	1	1		2	0.030328	91.549	56.325
EEEDVPGQAKDEL	Unmodified	1457.65	P27797	CALR	Calreticulin	2.0175	2.0175	1.878	2.0716	1	1	1	2	0.0011293	162.38	110.43
KEEDEEEDVPGQAKDEL	Unmodified	1958.86	P27797	CALR	Calreticulin	2.0198	1.8752	2.0198	2.0425	2	1	1	2;3	0.056702	74.147	40.053
IKKILDSVGIEADDDR	Unmodified	1785.95	P05387	RPLP2	60S acidic ribosomal protein P2	2.035	1.126	NaN	3.6779	1		1	3;4	0.017356	88.951	47.33
LSGDTQTDATSFYDR	Unmodified	1675.73	K7ELL7;P14314-2;P14314	PRKCSH	Glucosidase 2 subunit beta	2.0596	2.0596	NaN	NaN	1			2	0.044462	89.805	38.553
AGMKTASGDYIDSSWELR	Acetyl (N-term)	2027.93	F5H1C6;Q86UX7-2;Q86UX7	FERMT3	Fermitin family homolog 3	2.0652	2.0593	2.5663	2.0652	1	1	2	2;3	0.00094374	94.023	43.874
SLEKVCADLIR	Unmodified	1302.7	E5RJX2;P60866;P60866-2	RPS20	40S ribosomal protein S20	2.0712	2.0712	NaN	NaN	1			3	0.19257	69.261	9.7193
RAAPEASGTPSSDAVSR	Unmodified	1657.8	P31146	CORO1A	Coronin-1A	2.0718	NaN	2.0718	NaN		1		3	0.0046467	81.606	44.968
EEDEEDKEEDEEEDVPGQAKDEL	Unmodified	2705.08	P27797	CALR	Calreticulin	2.0736	1.6617	1.9473	1.4072	2	1	2	3	1.2703e-09	108.13	97.794
GQVINETSQHHDDLE	Unmodified	1720.77	P08670	VIM	Vimentin	2.0763	1.2436	1.3863	1.4496	8	6	8	2;3	1.9475e-178	236.22	160.06
SSEAPPLINEDVKR	Unmodified	1553.8	F8WF32;P04843	RPN1	Dolichyl-diphosphooligosaccharide--protein glycosyltransferase subunit 1	2.0766	1.9776	2.1683	2.0228	2	2	1	2;3	5.1985e-27	192.65	89.676
TAGPEEAALPPEQSR	Unmodified	1551.75	E9PIU6;E9PIN7;Q9H1E5	TMX4	Thioredoxin-related transmembrane protein 4	2.0769	2.0769	NaN	NaN	3			2	0.0018348	113.07	69.111
DLPLNVSR	Unmodified	912.503	P14625	HSP90B1	Endoplasmin	2.0892	2.0892	2.14	2.0216	1	1	1	2	6.3514e-10	151.29	59.392
LAQQYGVR	Unmodified	933.503	H7BZ94;P07237;I3L3P5;I3NI03;I3L3U6	P4HB	Protein disulfide-isomerase	2.0934	2.1562	2.0434	2.0934	1	1	1	2	0.17548	84.244	30.689
SAVFFEQGTTR	Unmodified	1241.6	H7C5R1;E9PFZ2;P00450	CP	Ceruloplasmin	2.1018	2.4537	1.8866	2.1018	1	1	1	2	0.033521	93.058	47.46
SLVCKAGIIASAR	Unmodified	1344.75	P13639	EEF2	Elongation factor 2	2.1136	NaN	2.1136	NaN		1		3	0.1453	70.26	33.116
SSSSLEKSYELPDGQVITIGNER	Unmodified	2508.23	P63261;P60709;Q6S8J3;A5A3E0;P63267;P68032;P62736;P68133;P63267-2	ACTG1;ACTB;POTEE;POTEF;ACTG2;ACTC1;ACTA2;ACTA1	Actin, cytoplasmic 2;Actin, cytoplasmic 2, N-terminally processed;Actin, cytoplasmic 1;Actin, cytoplasmic 1, N-terminally processed;POTE ankyrin domain family member E;POTE ankyrin domain family member F;Actin, gamma-enteric smooth muscle;Actin, alpha cardiac muscle 1;Actin, aortic smooth muscle;Actin, alpha skeletal muscle	2.1152	1.9729	3.1597	1.9378	6	3	3	3	2.2493e-22	170.02	132
DIQMTQSPSSLSASVGDR	Oxidation (M)	1893.87	P01594;P01593;A0A0G2JRQ6;A0A075B6S5;P04432;P04430;P01601;P01599;P01597	IGKV1-27	Ig kappa chain V-I region AU;Ig kappa chain V-I region AG;Ig kappa chain V-I region Daudi;Ig kappa chain V-I region BAN;Ig kappa chain V-I region HK101;Ig kappa chain V-I region Gal;Ig kappa chain V-I region DEE	2.1219	2.1409	1.9627	1.9079	4	3	2	2;3	5.4705e-94	224.42	204.21
FMIQGGDFTR	Unmodified	1170.55	P23284	PPIB	Peptidyl-prolyl cis-trans isomerase B	2.1262	2.233	2.1262	2.0838	1	1	1	2	2.741e-11	152.47	116.59
AMLVDELR	Unmodified	945.495	P11678	EPX	Eosinophil peroxidase;Eosinophil peroxidase light chain;Eosinophil peroxidase heavy chain	2.1332	1.9419	2.1694	2.1332	1	1	1	2	0.044348	108.09	34.113
FVDLEPTVIDEVR	Unmodified	1530.79	Q71U36-2;Q71U36;P68363;F5H5D3;Q9BQE3;F8VVB9;F8VQQ4;P68363-2;A0A1W2PQM2;F8VRK0;F8VX09;F8VWV9;F8VRZ4;F8VS66	TUBA1A;TUBA1B;TUBA1C	Tubulin alpha-1A chain;Tubulin alpha-1B chain;Tubulin alpha-1C chain	2.1411	2.3716	1.9888	2.2921	2	2	3	2;3	3.2958e-19	188.28	115.35
NLGLWDTAGQEDYDR	Unmodified	1751.78	J3KSC4;J3QLK0;P63000;P60763;P63000-2;B1AH77;B1AH78;B1AH80;P15153	RAC3;RAC1;RAC2	Ras-related C3 botulinum toxin substrate 1;Ras-related C3 botulinum toxin substrate 3;Ras-related C3 botulinum toxin substrate 2	2.142	2.8552	1.6069	NaN	1	1	1	2	0.011027	125.54	82.234
LATQLTGPVMPVR	Unmodified	1381.78	P26373;P26373-2	RPL13	60S ribosomal protein L13	2.1495	NaN	2.0258	2.2806		1	1	2	0.013839	97.472	50.653
STVEKTVAPTECS	Unmodified	1407.66	P0DOY3;P0DOY2;A0A0B4J231;P0CG04;B9A064	IGLL5;IGLC1	Ig lambda-1 chain C regions;Immunoglobulin lambda-like polypeptide 5	2.1496	2.096	2.2661	2.1496	1	1	2	2	2.0146e-17	183.85	123.92
EEENNLEVR	Unmodified	1130.52	F8WF32;P04843	RPN1	Dolichyl-diphosphooligosaccharide--protein glycosyltransferase subunit 1	2.1561	2.1561	NaN	NaN	1			2	1.3081e-12	156.35	41.849
GCPKPPEIAHGYVEHSVR	Unmodified	2031.99	H3BS21;A0A0C4DGL8;J3QLC9;J3QR68;H0Y300;P00738-2;P00738;J3KSV1;J3QQI8;H3BMJ7;J3KRH2	HP	Haptoglobin;Haptoglobin alpha chain;Haptoglobin beta chain	2.1584	NaN	NaN	2.1584			1	5	0.0023647	94.61	74.856
GETAKGDYPLEAVR	Unmodified	1504.75	H3BTN5;P14618-2;P14618;P14618-3;H3BR70;B4DNK4	PKM	Pyruvate kinase;Pyruvate kinase PKM	2.1592	2.1592	NaN	NaN	1			3	0.15595	77.633	30.927
KDNKILCNKCTTR	Unmodified	1649.83	Q5JXI2;Q13642-5;Q13642-4;A0A0D9SG53;A0A0D9SGB2;Q5JXI0;A0A0D9SFI6;A0A0D9SFB0;Q5JXH9;A0A0D9SFZ9;Q5JXH8;Q5JXH7;Q5JXI3;Q5JXI8;Q13642-3;Q13642-1;Q13642	FHL1	Four and a half LIM domains protein 1	2.1612	2.1612	NaN	NaN	1			3	0.101	88.163	17.622
GEDQTQDTELVETR	Unmodified	1619.73	Q5SRN7;A0A140T975;A0A140T955;A0A140T941;A0A140T933;A0A140T8W8;A0A0G2JI36;A0A1W2PS24;A0A1W2PRZ0;A0A1W2PR61;A0A1W2PR11;A0A1W2PQS8;Q9GJ45;A0A1W2PS39;A0A1W2PQD0;A0A1W2PPQ2;A0A1W2PPF8;A0A140T937;A0A140T9Z6;A0A140T9W2;A0A1W2PRT9;A0A1W2PPR8;B0UXQ0;A0A140T9I0;O19617;A0A1W2PSE7;A0A140T9U0;A0A140T962;A0A140T921;Q5SRN5;A0A140T9X5;A0A140T913;A0A140T8Y4;A0A0G2JIF2;A2AEA2;A0A140T9M0;A0A140T9J9;A0A140T9H5;A0A14…	HLA-A;HLA-C;HLA-B;HLA-H	HLA class I histocompatibility antigen, Cw-16 alpha chain;HLA class I histocompatibility antigen, B-38 alpha chain;HLA class I histocompatibility antigen, B-81 alpha chain;HLA class I histocompatibility antigen, B-59 alpha chain;HLA class I histocompatibility antigen, B-67 alpha chain;HLA class I histocompatibility antigen, B-82 alpha chain;HLA class I histocompatibility antigen, B-35 alpha chain…	2.1638	2.1696	2.1417	2.0232	2	2	2	2;3	0	323.45	237.64
STSSLTPCEQQQR	Unmodified	1520.69	H0YJV3;A0A087WZP6;Q14112-2;Q14112	NID2	Nidogen-2	2.167	2.167	NaN	NaN	1	1		2	2.5586e-17	182.64	95.74
APEEEDHVLVLR	Unmodified	1405.72	H7BZ94;P07237;I3L3P5;I3NI03;I3L3U6;I3L0S0;I3L1Y5;I3L514;I3L312	P4HB	Protein disulfide-isomerase	2.1705	2.1208	2.213	2.1257	2	2	2	3	4.3079e-05	160.18	106.62
GTEGGEGFVVKVR	Unmodified	1333.7	D6RF17;D6RDL0;E7EQJ0;D6RAM1;D6R9T0;D6RFM3;D6RIT2;E7EN40;D6RIU0;D6RDU3;D6RJ04;D6RIH9;D6RBM0;E9PCY7;G8JLB6;P31943;E5RJ94;D6R9D3;E5RGV0	HNRNPH1	Heterogeneous nuclear ribonucleoprotein H;Heterogeneous nuclear ribonucleoprotein H, N-terminally processed	2.1864	1.7855	NaN	2.6773	1		1	3	0.16816	81.278	38.302
GTVEEDLGKSR	Unmodified	1189.59	P14625;Q96GW1;A0A1W2PRR1;F8VPC7	HSP90B1	Endoplasmin	2.1937	2.5802	2.1512	2.0451	4	2	3	2;3	1.5099e-55	191.4	101.03
ASKPEDWDER	Unmodified	1231.55	P27797;K7EJB9	CALR	Calreticulin	2.197	2.735	2.1051	2.1717	1	3	2	2;3	3.7541e-07	143.4	95.692
DAINTEFKNTR	Unmodified	1307.65	P08670;B0YJC4;A0A1B0GTT5;A0A1B0GVG8	VIM	Vimentin	2.2068	2.2068	2.0058	2.3776	1	1	1	3	0.054078	87.568	30.018
DIQMTQSPSTLSASVGDR	Unmodified	1891.89	P01602	IGKV1-5	Ig kappa chain V-I region HK102	2.2173	2.3013	2.1272	2.1772	2	3	2	2;3	2.0007e-299	280.87	214.31
EAPKVVEEQESR	Unmodified	1399.69	A0A0G2JPR0;P0C0L5;P0C0L4	C4B;C4A	Complement C4-B;Complement C4 beta chain;Complement C4-B alpha chain;C4a anaphylatoxin;C4b-B;C4d-B;Complement C4 gamma chain;Complement C4-A;Complement C4 beta chain;Complement C4-A alpha chain;C4a anaphylatoxin;C4b-A;C4d-A;Complement C4 gamma chain	2.2292	2.2292	2.334	1.9892	1	1	2	2;3	0.02483	105.25	51.655
GSGEVVLSR	Unmodified	902.482	P01024	C3	Complement C3;Complement C3 beta chain;C3-beta-c;Complement C3 alpha chain;C3a anaphylatoxin;Acylation stimulating protein;Complement C3b alpha' chain;Complement C3c alpha' chain fragment 1;Complement C3dg fragment;Complement C3g fragment;Complement C3d fragment;Complement C3f fragment;Complement C3c alpha' chain fragment 2	2.2294	2.2733	NaN	2.1864	1		1	2	0.0047183	125.82	17.075
GSDCPEAMDLGTLSGIGTLDGFR	Oxidation (M)	2384.06	P02671-2;P02671	FGA	Fibrinogen alpha chain;Fibrinopeptide A;Fibrinogen alpha chain	2.2332	3.0396	NaN	1.6407	1		1	3	0.013673	79.461	49.879
EVDVDGTVEEDLGKSR	Unmodified	1746.83	P14625;Q96GW1;A0A1W2PRR1;F8VPC7	HSP90B1	Endoplasmin	2.2393	2.0792	2.3667	2.2338	3	2	2	3	6.0267e-05	164.7	109.5
SQILDLSNR	Unmodified	1044.56	P09874	PARP1	Poly [ADP-ribose] polymerase 1	2.2555	2.8879	1.7617	NaN	1	1		2	0.15305	79.148	18.238
EQDENGAEASADLR	Unmodified	1503.64	P26038	MSN	Moesin	2.2629	2.2629	NaN	NaN	1	1	2	2	1.0642e-06	168.61	117.33
YVLTQPPSVSVAPGQTAR	Unmodified	1869.99	P80748		Ig lambda chain V-III region LOI	2.2747	2.4016	2.1151	2.2805	2	4	2	2;3	1.6065e-05	124.38	50.476
LTGIPPAPR	Unmodified	920.544	E9PKE3;P11142;E9PNE6;A8K7Q2;Q53FA3;P34931;E9PS65;E9PM13;P11021	HSPA8;HSPA1L;HSPA5	Heat shock cognate 71 kDa protein;Heat shock 70 kDa protein 1-like;78 kDa glucose-regulated protein	2.2773	2.2487	2.3062	NaN	1	1		2	0.075924	89.296	42.214
DIQMTQSPSSVSASVGDR	Unmodified	1863.86	A0A0C4DH73;P01611	IGKV1-12	Ig kappa chain V-I region Wes	2.2812	2.3451	2.3075	2.1441	2	2	2	2;3	2.2539e-26	185.95	112.86
DIQMTQSPSTLSASVGDR	Oxidation (M)	1907.89	P01602	IGKV1-5	Ig kappa chain V-I region HK102	2.283	2.3522	2.2157	2.2473	3	2	2	2;3	7.0044e-07	161.21	112.21
GLLYCDLPEPR	Unmodified	1331.65	P02787;C9JVG0	TF	Serotransferrin	2.2881	NaN	NaN	2.2881			1	2	0.022434	114.86	46.488
FVDLEPTVIDEIR	Unmodified	1544.81	P68366-2;P68366;C9JDL2;C9JEV8;C9JQ00;C9JJQ8	TUBA4A	Tubulin alpha-4A chain	2.295	2.295	NaN	NaN	1			2	0.08788	99.283	46.793
ASGVTFTWTPSSGKSAVQGPPER	Unmodified	2346.16	P01876	IGHA1	Ig alpha-1 chain C region	2.2982	2.0681	2.353	2.2955	4	5	5	3	3.6345e-14	117.37	76.404
SSAASVYAGAGGSGSR	Unmodified	1383.64	P05783;F8VZY9;CON__P05784	KRT18	Keratin, type I cytoskeletal 18	2.2999	2.3824	NaN	2.2999	2		1	2	0.00025592	166.45	104.8	+
KESVPISDTIIPAVPPPTDLR	Unmodified	2244.24	P02751-10;P02751-5;P02751-9;P02751-14;P02751-8;P02751-17;P02751-3;P02751;P02751-4;P02751-6	FN1	Fibronectin;Anastellin;Ugl-Y1;Ugl-Y2;Ugl-Y3	2.3007	NaN	NaN	2.3007			1	3	0.20492	58.123	12.003
TQHIWESDSNEFSVIADPR	Unmodified	2230.03	P14625;Q96GW1;A0A1W2PRR1	HSP90B1	Endoplasmin	2.3039	2.3039	2.3916	1.9201	1	1	1	3	0.0012993	91.926	58.618
AAANQGKKTESASVQGR	Unmodified	1701.88	A0A087WVV2;A0A0A0MRV0;Q9P2E9-2;Q9P2E9;V9GY78	RRBP1	Ribosome-binding protein 1	2.3088	2.3088	2.0866	2.6189	1	1	1	4	0.0041892	107.69	60.066
CTQHYELCSGNQVR	Unmodified	1750.75	Q8NBS9-2;Q8NBS9	TXNDC5	Thioredoxin domain-containing protein 5	2.3088	2.6111	2.0415	2.4781	1	1	2	3	0.0073653	107.46	67.836
RQLQAQDEEGGGHVPER	Unmodified	1904.91	C9JU59;E7EMG9;P33241;P33241-3;C9JDV1	LSP1	Lymphocyte-specific protein 1	2.3093	2.487	NaN	2.1443	1		1	4	0.059817	73.498	44.686
SEKAKPALEDLR	Unmodified	1355.74	P02647;F8W696	APOA1	Apolipoprotein A-I;Proapolipoprotein A-I;Truncated apolipoprotein A-I	2.3172	NaN	2.3069	2.3274		1	1	3	0.056396	86.911	36.761
EYCIQALPEFDGKR	Unmodified	1724.82	P14625;Q58FF3	HSP90B1;HSP90B2P	Endoplasmin;Putative endoplasmin-like protein	2.3186	2.6167	2.3186	2.3988	1	2	3	3	7.2898e-10	165.51	100.29
DIQMTQSPSSLSASVGDR	Unmodified	1877.88	P01594;P01593;A0A0G2JRQ6;A0A075B6S5;P04432;P04430;P01601;P01599;P01597	IGKV1-27	Ig kappa chain V-I region AU;Ig kappa chain V-I region AG;Ig kappa chain V-I region Daudi;Ig kappa chain V-I region BAN;Ig kappa chain V-I region HK101;Ig kappa chain V-I region Gal;Ig kappa chain V-I region DEE	2.3212	2.2475	2.1911	2.4497	4	3	6	2;3	0	291.51	258.42
FVNDISEKEQR	Unmodified	1363.67	P14317;F8WDD5;F8WEZ6;E7EVW7;P14317-2	HCLS1	Hematopoietic lineage cell-specific protein	2.3214	NaN	2.3214	NaN		1		3	0.044635	89.827	89.827
SVTWSESGQGVTAR	Unmodified	1463.7	P01876	IGHA1	Ig alpha-1 chain C region	2.3222	2.4672	NaN	2.1858	1		1	2	0.0071183	105.2	48.772
AELEEVTLDGKPLQALR	Acetyl (N-term)	1923.03	S4R3H4;E7EQT4;Q9UKV3-5;Q9UKV3	ACIN1	Apoptotic chromatin condensation inducer in the nucleus	2.3231	2.3231	NaN	NaN	3	1	2	2	0.00042791	103.75	58.318
DIQMTQSPSSVSASVGDR	Oxidation (M)	1879.86	A0A0C4DH73;P01611	IGKV1-12	Ig kappa chain V-I region Wes	2.3307	2.7055	1.5949	2.2644	5	2	3	2;3	5.7554e-65	196.84	112.24
KLYQPEYQEVSTEEQR	Unmodified	2025.96	A0A087X054;Q9Y4L1	HYOU1	Hypoxia up-regulated protein 1	2.3382	2.5697	NaN	2.1275	1	1	1	3	0.0087018	110.12	62.591
DDEVDVDGTVEEDLGKSR	Unmodified	1976.88	P14625;Q96GW1;A0A1W2PRR1;F8VPC7	HSP90B1	Endoplasmin	2.3393	2.1426	2.3683	2.2677	20	8	7	2;3	2.625e-300	284.44	241.49
EVQLVESGGGLVKPGGSLR	Unmodified	1881.03	A0A0B4J1V0;A0A0B4J1V1	IGHV3-15;IGHV3-21		2.3581	2.4517	2.4016	2.1316	1	8	6	2;3	1.1826e-26	185.28	117.43
LVDLEPGTMDSVR	Unmodified	1430.71	Q5JP53;P07437;A0A0B4J269;Q13509;Q9BUF5;K7EK43;K7ESQ3;G3V5W4;K7EQT3;K7EJ64;K7ERA8;K7EJZ4;G3V2R8;A0A075B724;K7EL29;K7EN98;K7EPE5;G3V3R4;G3V2N6;Q3ZCM7;P68371;P04350;M0R0X0;M0QY85;M0QY37;M0QX14;M0QZL7;M0R278;Q9BVA1;Q13885	TUBB;TUBB3;TUBB6;TUBB8;TUBB4B;TUBB4A;TUBB2B;TUBB2A	Tubulin beta chain;Tubulin beta-3 chain;Tubulin beta-6 chain;Tubulin beta-8 chain;Tubulin beta-4B chain;Tubulin beta-4A chain;Tubulin beta-2B chain;Tubulin beta-2A chain	2.3602	2.295	2.3674	2.2267	1	1	1	2	0.00020609	143.4	81.748
FSALQQAVPTESTDNR	Unmodified	1762.85	H7C044;E7EX73;E9PGM1;E7EUU4;Q04637-6;Q04637-7;Q04637-5;Q04637-4;Q04637-3;Q04637;Q04637-8;Q04637-9	EIF4G1	Eukaryotic translation initiation factor 4 gamma 1	2.3843	2.9932	NaN	1.8993	1	1	1	2	0.00020053	110.92	38.489
ATEESDLAQQYGVR	Unmodified	1565.73	H7BZ94;P07237;I3L3P5;I3NI03;I3L3U6	P4HB	Protein disulfide-isomerase	2.3853	2.2118	2.047	1.9765	3	2	2	2;3	1.4211e-62	213.35	163.93
GAQGEPAEPEDAEKSR	Unmodified	1669.75	P40222	TXLNA	Alpha-taxilin	2.386	NaN	2.386	NaN		1		3	0.009178	118.2	74.904
EIVLVGGSTR	Unmodified	1029.58	P11021	HSPA5	78 kDa glucose-regulated protein	2.3929	2.3148	2.3929	2.415	1	1	1	2	0.0085175	109.48	24.267
ATDAWGIKVER	Unmodified	1244.65	P27105	STOM	Erythrocyte band 7 integral membrane protein	2.398	2.398	2.3703	2.3108	1	1	1	3	0.036798	91.701	42.351
SDDLPLNVSR	Unmodified	1114.56	P14625	HSP90B1	Endoplasmin	2.4055	2.6456	2.5434	2.2024	3	3	2	2	5.6572e-46	204.07	112.75
STESLQANVQR	Unmodified	1231.62	P26373;J3QSB4	RPL13	60S ribosomal protein L13	2.4082	NaN	2.4082	NaN		1		2	0.0030726	141.2	75.73
SVQAPSYGAR	Unmodified	1034.51	P05783;F8VZY9	KRT18	Keratin, type I cytoskeletal 18	2.4136	2.1198	2.7483	NaN	1	1		2	3.1806e-06	139.98	91.418
DSYVGDEAQSKR	Unmodified	1353.62	P63261;P60709;A6NL76;I3L3I0;I3L1U9;G5E9R0;C9JFL5;F6UVQ4;F6QUT6;E7EVS6;I3L3R2;J3KT65;I3L4N8;C9JTX5;C9JUM1;C9JZR7;F8WB63;B8ZZJ2;K7EM38;P63267;P68032;P62736;P68133	ACTG1;ACTB;ACTA1;ACTG2;ACTA2;ACTC1	Actin, cytoplasmic 2;Actin, cytoplasmic 2, N-terminally processed;Actin, cytoplasmic 1;Actin, cytoplasmic 1, N-terminally processed;Actin, gamma-enteric smooth muscle;Actin, alpha cardiac muscle 1;Actin, aortic smooth muscle;Actin, alpha skeletal muscle	2.416	2.416	NaN	NaN	1			3	0.15798	84.188	29.538
EILELAGNAAR	Unmodified	1155.62	Q93077;Q7L7L0;P04908;A0A0U1RR32;A0A0U1RRH7;Q99878;Q96KK5;Q9BTM1;Q16777;Q8IUE6;Q6FI13;P20671;P0C0S8;P16104;Q9BTM1-2;H0YFX9	HIST1H2AC;HIST3H2A;HIST1H2AB;HIST1H2AJ;HIST1H2AH;H2AFJ;HIST2H2AC;HIST2H2AB;HIST2H2AA3;HIST1H2AD;HIST1H2AG;H2AFX	Histone H2A type 1-C;Histone H2A type 3;Histone H2A type 1-B/E;Histone H2A type 1-J;Histone H2A type 1-H;Histone H2A.J;Histone H2A type 2-C;Histone H2A type 2-B;Histone H2A type 2-A;Histone H2A type 1-D;Histone H2A type 1;Histone H2AX;Histone H2A	2.4175	2.4175	NaN	NaN	1			2	0.14299	93.178	21.835
IDEIVLVGGSTR	Unmodified	1257.69	P11021	HSPA5	78 kDa glucose-regulated protein	2.4204	2.5857	2.3615	2.4204	1	1	1	2	0.0072585	108.47	34.005
NNERTRLLSR	Unmodified	1257.69	Q6UX65	DRAM2	DNA damage-regulated autophagy modulator protein 2	2.4204	NaN	NaN	2.4204			1	2	0.010064	108.43	8.4598
AIQMTQSPSSLSASVGDR	Unmodified	1833.89	A0A0C4DH72	IGKV1-6		2.4245	2.4245	1.8216	2.2814	2	1	1	2	3.6657e-28	170.79	97.289
NLGAAGAEEEQEEHQKCQQPR	Unmodified	2408.08	C9JU59;E7EMG9;P33241;P33241-3;C9JKF7;E9PBD8;P33241-2	LSP1	Lymphocyte-specific protein 1	2.4272	1.8897	3.1177	NaN	1	2		3;4	0.046528	79.326	43.788
AGTIAGLNVMR	Unmodified	1101.6	P11021	HSPA5	78 kDa glucose-regulated protein	2.4293	2.4316	2.4083	2.4081	1	1	1	2	7.1851e-18	182.65	100.22
AYEPEISR	Unmodified	963.466	E9PL01;A0A087WUC6;E9PI68;Q15005;E9PRB9	SPCS2	Signal peptidase complex subunit 2	2.46	NaN	2.46	NaN		1		2	0.14321	87.754	24.448
MESAGLEQLLR	Acetyl (N-term)	1287.65	H0YK93;H0YLV0;H0YL92;H0YKG5;H0YN14;Q8TEX9;Q8TEX9-2	IPO4	Importin-4	2.4742	2.9275	2.0938	2.4742	1	1	1	2	1.2078e-06	111.61	74.913
IIPNPQER	Unmodified	965.529	P08238;Q58FF7	HSP90AB1;HSP90AB3P	Heat shock protein HSP 90-beta;Putative heat shock protein HSP 90-beta-3	2.4745	3.0321	NaN	2.0194	1		1	2	0.058198	98.997	33.744
ITSLDQYVER	Unmodified	1222.62	P14625	HSP90B1	Endoplasmin	2.4768	2.4768	2.6728	2.4208	1	1	1	2	2.6303e-08	148.94	70.174
SDSLVVCEVDPELTEKLR	Acetyl (N-term)	2130.05	M0QXZ6;M0R2P2;M0QX47;M0QXC2;M0QYJ8;O60234	GMFG	Glia maturation factor gamma	2.4782	2.6147	2.2285	3.2462	2	3	2	2;3	0.00011983	100.43	44.541
AKTDQAQKAEGAGDAK	Unmodified	1587.79	P05204	HMGN2	Non-histone chromosomal protein HMG-17	2.479	NaN	2.1832	2.815		1	1	3	0.0083867	100.4	67.664
SPIQCIQAIAENR	Unmodified	1498.76	E7EQB2;E7ER44;P02788-2;P02788;C9JCF5	LTF	Lactotransferrin;Lactoferricin-H;Kaliocin-1;Lactoferroxin-A;Lactoferroxin-B;Lactoferroxin-C	2.4816	2.1008	NaN	7.6446	2		1	2	0.026069	105.2	46.574
SASVVSVISR	Unmodified	1003.57	F5H895;A0A0B4J239;F5GXX5;P61803	DAD1	Dolichyl-diphosphooligosaccharide--protein glycosyltransferase subunit DAD1	2.4903	2.4903	2.4026	2.3792	1	1	1	2	0.00072937	118.71	65.995
RLSPDFMIGEEDDDLMDVALIGN	Oxidation (M);Acetyl (N-term)	2622.18	Q15648	MED1	Mediator of RNA polymerase II transcription subunit 1	2.52	2.52	2.4795	2.738	1	1	1	3	0.00082858	42.908	7.4717
TLSELHCDKLHVDPENFR	Unmodified	2209.06	P68871	HBB	Hemoglobin subunit beta;LVV-hemorphin-7;Spinorphin	2.5226	2.5226	NaN	NaN	1			4	0.20064	64.588	35.961
EIVMTQSPATLSVSPGER	Oxidation (M)	1916.95	A0A087WSY6;P01624	IGKV3D-15	Ig kappa chain V-III region POM	2.5331	2.5331	2.5878	2.461	3	2	2	2;3	1.8895e-14	159	85.371
EEEETAKESTAEKDEL	Unmodified	1836.81	P14625	HSP90B1	Endoplasmin	2.542	NaN	2.2839	2.8293	1	1	1	2	7.2994e-05	116.19	87.424
GAVTDDEVIR	Acetyl (N-term)	1115.55	Q6I9Y2	THOC7	THO complex subunit 7 homolog	2.5497	2.5497	NaN	NaN	1			2	0.023331	61.691	19.295
SNEFSVIADPR	Unmodified	1233.6	P14625;Q96GW1;A0A1W2PRR1	HSP90B1	Endoplasmin	2.5505	2.5505	2.8338	2.3322	1	1	1	2	2.9535e-07	159.34	100.09
QTQDTELVETR	Unmodified	1318.64	Q5SRN7;A0A140T975;A0A140T955;A0A140T941;A0A140T933;A0A140T8W8;A0A0G2JI36;A0A1W2PS24;A0A1W2PRZ0;A0A1W2PR61;A0A1W2PR11;A0A1W2PQS8;Q9GJ45;A0A1W2PS39;A0A1W2PQD0;A0A1W2PPQ2;A0A1W2PPF8;A0A140T937;A0A140T9Z6;A0A140T9W2;A0A1W2PRT9;A0A1W2PPR8;B0UXQ0;A0A140T9I0;O19617;A0A1W2PSE7;A0A140T9U0;A0A140T962;A0A140T921;Q5SRN5;A0A140T9X5;A0A140T913;A0A140T8Y4;A0A0G2JIF2;A2AEA2;A0A140T9M0;A0A140T9J9;A0A140T9H5;A0A14…	HLA-A;HLA-C;HLA-B;HLA-H;HLA-F	HLA class I histocompatibility antigen, Cw-16 alpha chain;HLA class I histocompatibility antigen, B-38 alpha chain;HLA class I histocompatibility antigen, B-81 alpha chain;HLA class I histocompatibility antigen, B-59 alpha chain;HLA class I histocompatibility antigen, B-67 alpha chain;HLA class I histocompatibility antigen, B-82 alpha chain;HLA class I histocompatibility antigen, B-35 alpha chain…	2.5566	2.2197	2.5566	2.7823	1	1	1	2	0.030391	94.363	32.671
DLADLSCLVYR	Unmodified	1323.65	P84090	ERH	Enhancer of rudimentary homolog	2.5775	NaN	NaN	2.5775			1	2	0.0079171	107.21	28.689
SYELTQPPSVSVSPGQTAR	Unmodified	2003	A0A075B6K4;P01717	IGLV3-10	Ig lambda chain V-IV region Hil	2.5841	2.8063	2.26	2.359	2	2	2	2;3	1.6001e-62	240.59	166.96
EYDESGPSIVHR	Unmodified	1387.64	P63261;P60709;Q6S8J3;Q9BYX7;A5A3E0;P0CG38;P0CG39	ACTG1;ACTB;POTEE;POTEKP;POTEF;POTEI;POTEJ	Actin, cytoplasmic 2;Actin, cytoplasmic 2, N-terminally processed;Actin, cytoplasmic 1;Actin, cytoplasmic 1, N-terminally processed;POTE ankyrin domain family member E;Putative beta-actin-like protein 3;Putative beta-actin-like protein 3, N-terminally processed;POTE ankyrin domain family member F;POTE ankyrin domain family member I;POTE ankyrin domain family member J	2.5856	2.5856	2.074	2.6406	1	1	1	3	1.6685e-17	184.55	159.7
LLGEGIYAR	Unmodified	990.55	P35573-2;P35573-3;P35573	AGL	Glycogen debranching enzyme;4-alpha-glucanotransferase;Amylo-alpha-1,6-glucosidase	2.5895	NaN	2.7211	2.4641		1	1	2	0.1443	80.229	14.977
GGLMLPLR	Unmodified	855.5	P31146;H3BTU6;H3BRJ0;H3BRY3;H3BNA2;H3BU76;H3BSL1	CORO1A	Coronin-1A;Coronin	2.5964	2.7353	2.5964	2.5664	1	1	1	2	0.0073572	137.44	85.141
EAERLRLQHMQDYPNYKYR	Unmodified	2509.23	A0A0A6YYK5;Q9BT81;Q9BT81-2	SOX7	Transcription factor SOX-7	2.6053	NaN	2.6053	NaN		1		3	0.051156	74.428	21.93
LSDQVPDTESETR	Unmodified	1475.67	P01024	C3	Complement C3;Complement C3 beta chain;C3-beta-c;Complement C3 alpha chain;C3a anaphylatoxin;Acylation stimulating protein;Complement C3b alpha' chain;Complement C3c alpha' chain fragment 1;Complement C3dg fragment;Complement C3g fragment;Complement C3d fragment;Complement C3f fragment;Complement C3c alpha' chain fragment 2	2.6073	2.7739	2.4507	NaN	1	1		2	0.0085311	114.86	50.822
THLGGEDFDQR	Unmodified	1273.57	P11021	HSPA5	78 kDa glucose-regulated protein	2.6157	NaN	2.4635	2.7772		1	1	3	0.0044488	110.54	62.45
TSEYIISCHPVGTDEEPLQFR	Unmodified	2477.15	P02751-10;P02751-5;P02751-9;P02751-14;P02751-8;P02751-17;P02751-3;P02751;H0Y7Z1;P02751-12;P02751-13;P02751-11;P02751-7;P02751-15	FN1	Fibronectin;Anastellin;Ugl-Y1;Ugl-Y2;Ugl-Y3	2.6183	NaN	2.6183	NaN		1		3	0.035339	60.669	33.754
TLLIKTVETR	Unmodified	1172.71	P08670	VIM	Vimentin	2.6357	NaN	2.1312	3.2596		1	1	3	0.027648	94.409	50.774
GPVVIGSTSAPGQGGILAQR	Unmodified	1864.02	E9PQI4;P43308	SSR2	Translocon-associated protein subunit beta	2.6372	2.8406	2.6587	2.3406	3	2	5	2;3	2.5738e-32	184.34	143.18
MGQKDSYVGDEAQSKR	Unmodified	1797.83	P63261;P60709;A6NL76;I3L3I0;I3L1U9;G5E9R0;C9JFL5;F6UVQ4;F6QUT6;E7EVS6;I3L3R2;J3KT65;C9JTX5;C9JUM1;C9JZR7;F8WB63;B8ZZJ2;K7EM38;P63267;P68032;P62736;P68133	ACTG1;ACTB;ACTA1;ACTG2;ACTA2;ACTC1	Actin, cytoplasmic 2;Actin, cytoplasmic 2, N-terminally processed;Actin, cytoplasmic 1;Actin, cytoplasmic 1, N-terminally processed;Actin, gamma-enteric smooth muscle;Actin, alpha cardiac muscle 1;Actin, aortic smooth muscle;Actin, alpha skeletal muscle	2.6417	2.9183	NaN	2.3913	1		1	4	0.10865	70.134	37.319
TVQDNLGAAGAEEEQEEHQKCQQPR	Unmodified	2851.28	C9JU59;E7EMG9;P33241;P33241-3;C9JKF7;E9PBD8;P33241-2	LSP1	Lymphocyte-specific protein 1	2.6434	NaN	2.627	2.6599		1	1	4	3.0069e-13	105.06	71.389
VSIAPSQR	Unmodified	856.477	O43395-3;O43395	PRPF3	U4/U6 small nuclear ribonucleoprotein Prp3	2.6768	NaN	NaN	2.6768			1	2	0.0011662	106.42	8.9425
VDGTVEEDLGKSR	Unmodified	1403.69	P14625;Q96GW1;A0A1W2PRR1;F8VPC7	HSP90B1	Endoplasmin	2.6962	4.1445	2.5481	2.6962	1	1	1	3	0.00804	121.21	63.861
IQMTQSPSTLSASVGDR	Unmodified	1776.87	P01602	IGKV1-5	Ig kappa chain V-I region HK102	2.6984	NaN	2.3746	3.0662		1	1	2	0.10078	76.357	13.724
TNGENIAESLVAEGLATR	Unmodified	1843.93	Q7KZF4	SND1	Staphylococcal nuclease domain-containing protein 1	2.706	2.706	NaN	NaN	1			3	0.10604	64.249	13.352
GGLICTSCR	Unmodified	1022.46	P31146;H3BTU6;H3BRJ0;H3BRY3	CORO1A	Coronin-1A;Coronin	2.7127	2.6138	2.7598	2.7127	1	1	1	2	0.16788	77.318	29.743
EGNPGPDGAPGER	Unmodified	1251.55	A0A087X0S5;P12109	COL6A1	Collagen alpha-1(VI) chain	2.7161	2.726	2.7063	NaN	1	1		2	0.080543	80.318	39.325
IQMTQSPSSLSASVGDR	Unmodified	1762.85	P01594;P01593;A0A0G2JRQ6;A0A075B6S5;P04432;P04430;P01601;P01599;P01597;A0A0C4DH72	IGKV1-27;IGKV1-6	Ig kappa chain V-I region AU;Ig kappa chain V-I region AG;Ig kappa chain V-I region Daudi;Ig kappa chain V-I region BAN;Ig kappa chain V-I region HK101;Ig kappa chain V-I region Gal;Ig kappa chain V-I region DEE	2.7425	2.5704	2.8509	2.8122	2	1	2	2;3	0.0041723	86.016	26.382
AKDTPDEPWAFPAR	Unmodified	1599.77	Q7KZF4	SND1	Staphylococcal nuclease domain-containing protein 1	2.7444	2.7793	2.7444	2.3307	1	3	1	3	0.076177	87.498	27.891
SAPATGGVKKPHR	Unmodified	1304.73	Q71DI3;Q16695;P68431;Q5TEC6	HIST2H3A;HIST3H3;HIST1H3A;HIST2H3PS2	Histone H3.2;Histone H3.1t;Histone H3.1;Histone H3	2.7482	NaN	NaN	2.7482			1	3	0.19586	78.903	22.34
AESSDKLYR	Acetyl (N-term)	1109.54	P09874;Q5VX84;Q5VX85	PARP1	Poly [ADP-ribose] polymerase 1	2.7935	2.7728	2.7935	2.8446	1	1	1	2	0.0042574	98.523	44.318
GVFQEDAPVIHQEMIGGLR	Unmodified	2095.05	P01024	C3	Complement C3;Complement C3 beta chain;C3-beta-c;Complement C3 alpha chain;C3a anaphylatoxin;Acylation stimulating protein;Complement C3b alpha' chain;Complement C3c alpha' chain fragment 1;Complement C3dg fragment;Complement C3g fragment;Complement C3d fragment;Complement C3f fragment;Complement C3c alpha' chain fragment 2	2.8002	2.8002	NaN	NaN	1		1	3	3.2352e-06	127.32	79.682
ASSSSLEKSYELPDGQVITIGNER	Unmodified	2579.27	P63261;P60709;Q6S8J3;A5A3E0;P63267;P68032;P62736;P68133;P63267-2	ACTG1;ACTB;POTEE;POTEF;ACTG2;ACTC1;ACTA2;ACTA1	Actin, cytoplasmic 2;Actin, cytoplasmic 2, N-terminally processed;Actin, cytoplasmic 1;Actin, cytoplasmic 1, N-terminally processed;POTE ankyrin domain family member E;POTE ankyrin domain family member F;Actin, gamma-enteric smooth muscle;Actin, alpha cardiac muscle 1;Actin, aortic smooth muscle;Actin, alpha skeletal muscle	2.8141	3.588	2.7359	3.8791	3	1	2	3	2.7063e-11	121.39	77.568
ESFSDYPPLGR	Unmodified	1266.59	A0A087WVQ9;P68104-2;Q5VTE0;P68104	EEF1A1;EEF1A1P5	Elongation factor 1-alpha 1;Putative elongation factor 1-alpha-like 3	2.8163	2.6107	2.8163	2.898	1	1	1	2	0.00066497	117.53	58.545
DEVDVDGTVEEDLGKSR	Unmodified	1861.85	P14625;Q96GW1;A0A1W2PRR1;F8VPC7	HSP90B1	Endoplasmin	2.8352	3.027	2.9335	2.6508	2	4	1	3	0.0010408	132.65	81.841
GEGDDLDLWTVR	Unmodified	1374.64	Q9HCN8	SDF2L1	Stromal cell-derived factor 2-like protein 1	2.8563	2.9269	2.8319	2.7021	1	1	2	2	3.4694e-25	188.99	132.42
AFLGAEEAKTFDQLTPEESKER	Unmodified	2495.22	O43852-2;O43852-4;O43852;O43852-3;O43852-8;O43852-9;O43852-7;O43852-5;O43852-6;O43852-12;O43852-13;O43852-14;O43852-11;O43852-10	CALU	Calumenin	2.8733	3.1463	NaN	2.624	1		1	4	1.8463e-05	86.8	79.354
LPAENSNSETIIITGKR	Unmodified	1841.98	A0A024R4E5;Q00341-2;Q00341;H7BZC3;H7C2D1;H0Y394	HDLBP	Vigilin	2.8746	NaN	NaN	2.8746			1	3	0.12721	71.781	38.029
LQGQPAEEIFESVGDR	Unmodified	1773.85	P49257	LMAN1	Protein ERGIC-53	2.9068	2.8658	2.6966	2.9068	4	2	3	2;3	0.0016488	101.39	54.433
TYSLGSALR	Unmodified	966.513	P08670;B0YJC4;A0A1B0GTT5;A0A1B0GVG8	VIM	Vimentin	2.9187	NaN	2.8296	3.0106		1	1	2	0.0082003	113.41	63.387
TLSLSPGER	Unmodified	958.508	P01619;A0A0C4DH90;A0A075B6H7;A0A0C4DH55;A0A0A0MRZ8;A0A0C4DH25;P04433	IGKV3OR2-268;IGKV3-7;IGKV3D-7;IGKV3D-11;IGKV3D-20	Ig kappa chain V-III region B6;Ig kappa chain V-III region VG	2.9322	NaN	2.7679	3.1061		1	1	2	0.15817	78.516	25.35
LRPGDCEVCISYLGR	Unmodified	1793.86	H7C2D6;A8K878;P55145	MANF	Mesencephalic astrocyte-derived neurotrophic factor	2.9363	2.9347	2.8168	2.9912	2	2	1	3	0.007094	122.12	81.314
GLNASQIR	Unmodified	857.472	P14625;Q96GW1;A0A1W2PRR1	HSP90B1	Endoplasmin	2.9367	2.9367	3.1489	2.8112	1	1	1	2	7.3549e-17	160.03	32.91
EPEWVKTER	Unmodified	1172.58	O43852-2;O43852-4;O43852;O43852-3;H0Y875;O43852-15	CALU	Calumenin	2.9526	3.1533	2.66	2.0154	1	1	1	3	0.12473	82.645	41.481
DLQNDEVAFR	Unmodified	1205.57	D6RED7;D6RAS7;H0Y8L7;D6RB09;E9PFI5;D6RG13;D6RAT0;P61247;D6RGE0;D6RI02	RPS3A	40S ribosomal protein S3a	2.9548	2.9762	2.2469	2.9548	1	1	1	2	0.010028	131.44	61.615
TVAIGGVDGNVR	Unmodified	1156.62	O75083-3;O75083	WDR1	WD repeat-containing protein 1	2.9601	3.1029	1.9102	2.8238	1	2	1	2	0.046078	104.22	27.395
ASNLETGVPSR	Unmodified	1129.57	P01594;P01593		Ig kappa chain V-I region AU;Ig kappa chain V-I region AG	2.9647	2.9647	2.9354	3.112	1	1	1	2	2.313e-05	143.4	52.797
CIVLSDDTCSDEKIR	Unmodified	1809.82	P55072;C9JUP7;C9IZA5	VCP	Transitional endoplasmic reticulum ATPase	2.9662	2.9662	NaN	NaN	1			3	0.05053	88.075	51.082
SSLAEGSVTSVGSVNPAENFR	Unmodified	2107.02	P13010	XRCC5	X-ray repair cross-complementing protein 5	2.9769	2.9769	NaN	NaN	1			3	0.12608	45.423	7.5721
RMFGGPGTASR	Unmodified	1135.56	P08670;B0YJC4;A0A1B0GTT5;A0A1B0GVG8	VIM	Vimentin	2.9849	2.9978	2.9806	2.9849	1	1	1	3	0.036798	91.701	47.276
TEAQIGER	Unmodified	902.446	P22735	TGM1	Protein-glutamine gamma-glutamyltransferase K	2.9885	1.8272	4.888	NaN	1	1		2	0.055108	94.407	2.501
GNTDEPEWVKTER	Unmodified	1559.72	O43852-2;O43852-4;O43852;O43852-3;H0Y875;O43852-15	CALU	Calumenin	2.9891	3.0107	2.9659	2.7865	1	1	1	3	0.0081287	105.25	50.727
GNPFDQDIYGR	Unmodified	1280.58	P50454;E9PKH2	SERPINH1	Serpin H1	3.0238	2.9688	3.0618	3.0238	1	1	1	2	3.2207e-05	112.83	66.408
GMEYPFIGEGEPHVDGEPGDLR	Unmodified	2400.07	H7C2Y5;Q9UBS4	DNAJB11	DnaJ homolog subfamily B member 11	3.0262	3.0286	NaN	3.0238	1		1	3	0.0063925	72.09	48.76
EIVLTQSPGTLSLSPGER	Unmodified	1883	P01619		Ig kappa chain V-III region B6	3.0264	1.8594	2.6571	1.8201	11	6	10	2;3	0	326.81	281.53
GLSQSALPYR	Unmodified	1090.58	E9PS50;J3KMX5;P62277	RPS13	40S ribosomal protein S13	3.0315	3.2328	2.8427	2.8277	1	1	1	2	0.014417	101.25	49.304
EIVMTQSPATLSVSPGER	Unmodified	1900.96	A0A087WSY6;P01624	IGKV3D-15	Ig kappa chain V-III region POM	3.0455	3.0552	3.0455	2.9402	3	2	2	2;3	0	336.27	265.78
SKPVNLGLWDTAGQEDYDR	Unmodified	2163.02	B1AH77;B1AH78;B1AH80;P15153	RAC2	Ras-related C3 botulinum toxin substrate 2	3.0593	3.4417	NaN	2.6835	1		2	3	0.00090459	93.269	61.95
SHEENGPEPDWVLSER	Unmodified	1879.83	Q15293-2;Q15293	RCN1	Reticulocalbin-1	3.0675	NaN	3.2023	2.9384		1	1	3	0.0018839	97.129	59.336
DLGTLSGIGTLDGFR	Unmodified	1520.78	P02671-2;P02671	FGA	Fibrinogen alpha chain;Fibrinopeptide A;Fibrinogen alpha chain	3.0832	2.069	1.8565	4.0998	2	2	1	2	6.4155e-26	178.71	118.61
GLISWDEYR	Unmodified	1137.55	O43852-2;O43852-4;O43852-8;O43852-7	CALU	Calumenin	3.0957	3.6337	2.6374	NaN	1	1	1	2	0.045697	94.114	28.041
DGVGGDPAVALPHR	Unmodified	1359.69	P49257	LMAN1	Protein ERGIC-53	3.0986	2.976	NaN	3.2262	1		1	3	0.11549	73.466	31.465
AAEALAAEAVASR	Acetyl (N-term)	1270.65	B7ZLP8;A2RTX5-2;A2RTX5	TARSL2	Probable threonine--tRNA ligase 2, cytoplasmic	3.1237	4.3493	NaN	2.2435	1		2	2	0.0089508	57.175	28.217
GGGAGGTFQPYLDTLR	Unmodified	1608.79	C9J5Z8;Q9Y5M8	SRPRB	Signal recognition particle receptor subunit beta	3.1309	NaN	NaN	3.1309			1	2	0.017865	92.943	30.48
AAKNQLTSNPENTVFDAKR	Unmodified	2103.07	P11021	HSPA5	78 kDa glucose-regulated protein	3.1326	2.1801	2.4084	0.92654	2	1	1	4	0.00089892	115.66	102.41
SSEPVVEDER	Unmodified	1145.52	A0A087X0J4;E5RJL3;A0A087WUJ2;A0A087WW51;E5RG29;A0A0A0MSK8;E5RG56;Q12797-9;Q12797-6;Q12797-5;Q12797-8;Q12797-2;Q12797-10;Q12797	ASPH	Aspartyl/asparaginyl beta-hydroxylase	3.138	3.138	NaN	NaN	1			2	0.033915	92.051	92.051
AENNSEVGASGYGVPGPTWDR	Unmodified	2161.97	Q08211	DHX9	ATP-dependent RNA helicase A	3.1765	NaN	3.1765	NaN		1		3	0.012869	69.272	31.179
GEVDAEELQR	Unmodified	1144.54	C9JV47;C9JIZ3;C9JWQ8;H7BXD5;P28676	GCA	Grancalcin	3.1895	NaN	3.2529	3.1274		1	1	2	0.012652	106.68	49.636
EEMDVGTDEEEETAKESTAEKDEL	Unmodified	2713.13	P14625	HSP90B1	Endoplasmin	3.2087	2.9639	3.6751	3.2419	3	3	3	3	7.637e-09	100.28	57.571
GWQVEEADDWLR	Unmodified	1502.68	P11216;E9PK47;P06737-2;P06737	PYGB;PYGL	Glycogen phosphorylase, brain form;Alpha-1,4 glucan phosphorylase;Glycogen phosphorylase, liver form	3.2632	3.2632	NaN	NaN	1			2	0.011829	130.66	75.674
EEVSGNVSPGTR	Unmodified	1230.58	P02671-2;P02671	FGA	Fibrinogen alpha chain;Fibrinopeptide A;Fibrinogen alpha chain	3.3989	3.3989	3.3949	3.4627	1	1	1	2	0.0083551	106.2	39.029
MDGEWEAPQIANPR	Unmodified	1612.73	P27824-3;P27824;P27824-2;D6RGY2	CANX	Calnexin	3.4362	3.0125	3.9195	NaN	1	1		2	0.073154	88.187	40.899
DKESVPISDTIIPAVPPPTDLR	Unmodified	2359.26	P02751-10;P02751-5;P02751-9;P02751-14;P02751-8;P02751-17;P02751-3;P02751;P02751-4;P02751-6	FN1	Fibronectin;Anastellin;Ugl-Y1;Ugl-Y2;Ugl-Y3	3.5208	3.0667	3.7991	4.1247	2	1	1	3	2.6947e-10	105.67	61.008
GWLTSDPR	Unmodified	930.456	P02675;D6REL8	FGB	Fibrinogen beta chain;Fibrinopeptide B;Fibrinogen beta chain	3.5341	3.5341	NaN	NaN	1			2	0.015995	89.369	8.8141
VQGWETEERPR	Unmodified	1385.67	A6NG45;Q13162	PRDX4	Peroxiredoxin-4	3.5588	3.6047	3.5588	2.9334	1	1	1	3	0.011555	104.43	61.029
MNTENGGWTVIQNR	Unmodified	1618.75	P02675;D6REL8	FGB	Fibrinogen beta chain;Fibrinopeptide B;Fibrinogen beta chain	3.5692	NaN	3.3866	3.7617		1	1	2	0.044414	95.417	54.254
PDTQTPSWLGLPNNAER	Unmodified	1894.92	Q14204	DYNC1H1	Cytoplasmic dynein 1 heavy chain 1	3.5694	3.5694	3.3675	3.6469	1	1	1	2	0.049894	75.566	44.738
LDVGNFSWGSECCTR	Unmodified	1786.74	P62241	RPS8	40S ribosomal protein S8	3.5723	3.4664	3.5723	3.7227	1	1	1	2	0.0027582	110.07	45.338
LLTEAPLNPKANR	Unmodified	1435.81	P63261;P60709;Q6S8J3;A6NL76;I3L3I0;I3L1U9;G5E9R0;C9JFL5;F6UVQ4;F6QUT6;E7EVS6;I3L3R2;J3KT65;Q9BYX7;I3L4N8;P0CG38;P0CG39;P63267;P68032;P62736;P68133;P63267-2	ACTG1;ACTB;POTEE;ACTA1;ACTG2;ACTA2;POTEKP;POTEI;POTEJ;ACTC1	Actin, cytoplasmic 2;Actin, cytoplasmic 2, N-terminally processed;Actin, cytoplasmic 1;Actin, cytoplasmic 1, N-terminally processed;POTE ankyrin domain family member E;Putative beta-actin-like protein 3;Putative beta-actin-like protein 3, N-terminally processed;POTE ankyrin domain family member I;POTE ankyrin domain family member J;Actin, gamma-enteric smooth muscle;Actin, alpha cardiac muscle 1;…	3.6036	NaN	NaN	3.6036			1	3	0.013224	111.86	47.417
DIQLTQSPSFLSASVGDR	Unmodified	1919.96	A0A0C4DH69	IGKV1-9		3.6782	3.6782	NaN	NaN	1		1	2	1.0353e-05	104.9	39.063
SDRPSGIPER	Unmodified	1112.56	P80748		Ig lambda chain V-III region LOI	3.6895	3.6895	3.5615	4.0189	1	1	1	3	0.022965	96.171	47.888
TGAAPIIDVVR	Unmodified	1110.64	E9PJD9;E9PLL6;E9PLX7;P46776	RPL27A	60S ribosomal protein L27a	3.7316	4.6755	3.7316	3.6472	1	1	1	2	0.00052226	120.45	73.99
SELGNQSPSTSSR	Unmodified	1348.62	H0YD16;A0A0A0MSK5;J3KN66;Q5JTV8;Q5JTV8-3	TOR1AIP1	Torsin-1A-interacting protein 1	3.8194	4.0523	3.5999	NaN	1	1		2	0.027029	92.611	32.133
AEAGAGSATEFQFR	Unmodified	1440.66	P46783;Q9NQ39	RPS10;RPS10P5	40S ribosomal protein S10;Putative 40S ribosomal protein S10-like	3.8217	4.0951	3.8217	2.5298	1	1	1	2	0.029344	100.55	57.246
GMGQKDSYVGDEAQSKR	Unmodified	1854.85	P63261;P60709;A6NL76;I3L3I0;I3L1U9;G5E9R0;C9JFL5;F6UVQ4;F6QUT6;E7EVS6;I3L3R2;J3KT65;C9JTX5;C9JUM1;C9JZR7;F8WB63;B8ZZJ2;K7EM38;P63267;P68032;P62736;P68133	ACTG1;ACTB;ACTA1;ACTG2;ACTA2;ACTC1	Actin, cytoplasmic 2;Actin, cytoplasmic 2, N-terminally processed;Actin, cytoplasmic 1;Actin, cytoplasmic 1, N-terminally processed;Actin, gamma-enteric smooth muscle;Actin, alpha cardiac muscle 1;Actin, aortic smooth muscle;Actin, alpha skeletal muscle	3.9569	3.3739	4.026	4.0155	4	2	4	3;4	3.4811e-22	169.98	127.2
AVHPGGDTVAIGGVDGNVR	Unmodified	1789.91	O75083-3;O75083	WDR1	WD repeat-containing protein 1	3.9787	3.9787	NaN	NaN	1			3	0.057892	65.105	22.32
YELTQPSSVSVSPGQTAR	Unmodified	1905.94	P01718		Ig lambda chain V-IV region Kern	4.0839	3.5148	4.641	NaN	3	2		2;3	6.1475e-10	145.83	80.333
VGTDEEEETAKESTAEKDEL	Unmodified	2208.98	P14625	HSP90B1	Endoplasmin	4.0852	4.435	4.0852	4.2302	2	1	2	3	0.015706	68.261	57.336
GGSTSYGTGSETESPR	Unmodified	1571.67	P02671-2;P02671	FGA	Fibrinogen alpha chain;Fibrinopeptide A;Fibrinogen alpha chain	4.2518	4.3435	3.7979	3.2833	1	1	1	2	9.5306e-168	234.63	140.99
SDWPFCSDEDWNYKCPSGCR	Unmodified	2564.98	P02671-2;P02671;A0A087WUA0	FGA	Fibrinogen alpha chain;Fibrinopeptide A;Fibrinogen alpha chain	4.2951	5.1027	4.7224	3.3594	4	2	2	3	2.8378e-07	149.86	143.97
SVYYNEATGGKYVPR	Unmodified	1702.83	Q5JP53;P07437	TUBB	Tubulin beta chain	4.3373	NaN	15.779	1.1922		1	1	3	0.0047419	107.14	68.107
LPLRAQINL	Unmodified	1036.64	P52732	KIF11	Kinesin-like protein KIF11	4.3491	5.0571	3.4889	1.6515	1	1	1	2	0.0047614	124.89	50.472
SAQASDMGGESPGSR	Unmodified	1435.6	H0YAC6;E9PEM5;P50851-2;P50851	LRBA	Lipopolysaccharide-responsive and beige-like anchor protein	4.4034	NaN	4.4034	NaN		1		2	0.0014981	147.24	101.25
ETVNSNIPTNLR	Unmodified	1356.7	P02675	FGB	Fibrinogen beta chain;Fibrinopeptide B;Fibrinogen beta chain	4.4219	3.3938	4.4219	3.6484	1	1	1	2	3.3437e-05	145.99	99.526
ASSPGGVYATR	Unmodified	1064.53	P08670;B0YJC4;A0A1B0GTT5;A0A1B0GVG8	VIM	Vimentin	4.5028	4.507	NaN	4.4987	1		1	2	0.00021888	140.11	83.391
GLETESPVR	Unmodified	986.503	F8VXK0;J3KN11;F8VU90;Q9NYL4-2;Q9NYL4	FKBP11	Peptidyl-prolyl cis-trans isomerase;Peptidyl-prolyl cis-trans isomerase FKBP11	4.626	5.9446	3.3425	4.626	1	1	1	2	0.015542	102.51	28.539
GGTTDYAAPVKGR	Unmodified	1291.65	A0A0B4J1V0	IGHV3-15		4.6275	4.6275	4.3813	5.1536	1	1	1	3	0.011909	98.182	50.211
EVNQDFTNR	Unmodified	1121.51	P02671-2;P02671;A0A087WUA0	FGA	Fibrinogen alpha chain;Fibrinopeptide A;Fibrinogen alpha chain	4.6445	4.5149	4.7177	4.6445	1	1	1	2	7.9716e-05	140.5	76.237
DVDVSKPDLTAALR	Unmodified	1498.8	P08670;B0YJC4;B0YJC5	VIM	Vimentin	4.6779	4.7032	4.6142	3.9204	1	1	1	3	0.016663	94.09	61.931
ASSHQHSRR	Unmodified	1064.52	F8WD88;P49450-2;P49450	CENPA	Histone H3-like centromeric protein A	4.7987	NaN	4.7987	NaN		1		2	0.0211	98.629	35.211
EAQTETCTVAPR	Unmodified	1361.62	P04155	TFF1	Trefoil factor 1	4.9788	3.8625	5.5031	4.9788	1	1	1	2	3.2238e-36	202.96	145.37
GIVGYVETPR	Unmodified	1089.58	F8WCR1;H7C3M2;B5MCW2;H7C422;G5E9G0;P39023	RPL3	60S ribosomal protein L3	5.1426	7.2942	4.167	5.1426	1	1	1	2	0.018272	125.82	47.301
EAERDEYELLCPDNTR	Unmodified	2008.88	E7EQB2;E7ER44;P02788-2;P02788	LTF	Lactotransferrin;Lactoferricin-H;Kaliocin-1;Lactoferroxin-A;Lactoferroxin-B;Lactoferroxin-C	5.2582	NaN	5.2582	NaN		1	1	3	0.13317	82.121	38.166
APQLDDEEMYSAHMPAHLR	Unmodified	2209.99	Q8WU39;H0Y9L3;D6RII0;Q8WU39-5;Q8WU39-4;Q8WU39-2	MZB1	Marginal zone B- and B1-cell-specific protein	5.2632	6.3321	NaN	4.6503	1		2	4	0.047272	75.564	45.457
DEEMYSAHMPAHLR	Unmodified	1685.73	Q8WU39;H0Y9L3;D6RII0;Q8WU39-5;Q8WU39-4;Q8WU39-2	MZB1	Marginal zone B- and B1-cell-specific protein	5.3493	NaN	NaN	5.3493			1	3	0.055102	92.295	53.513
SLYASSPGGVYATR	Unmodified	1427.7	P08670;B0YJC4;A0A1B0GTT5;A0A1B0GVG8	VIM	Vimentin	5.678	5.955	5.4068	6.2307	2	3	3	2;3	0.0021081	159.09	93.862
GGGWWYNR	Unmodified	994.441	P02675;D6REL8;CON__P02676	FGB	Fibrinogen beta chain;Fibrinopeptide B;Fibrinogen beta chain	5.7677	NaN	5.7126	5.8234		1	1	2	0.047814	103.29	63.018
ADEEKLPPGWEKR	Acetyl (N-term)	1595.79	K7EP26;K7EMU7;O15428;Q13526	PIN1;PIN1P1	Putative PIN1-like protein;Peptidyl-prolyl cis-trans isomerase NIMA-interacting 1	5.8035	5.8035	NaN	NaN	1			3	0.01557	109.16	61.627
TVSCNIPVVSGKECEEIIR	Unmodified	2189.08	P02675;D6REL8	FGB	Fibrinogen beta chain;Fibrinopeptide B;Fibrinogen beta chain	5.9254	NaN	6.5732	5.9254	1	2	1	3	0.00084241	93.495	57.369
FLQHKDDNPNLPR	Unmodified	1592.81	A0A0C4DGB6;CON__P02768-1;P02768;A0A087WWT3;P02768-3;H7C013	ALB	Serum albumin	6.0098	NaN	6.0098	NaN		1		3	0.1323	84.352	31.776	+
SNSMQTIQKTTTR	Unmodified	1494.75	P05783	KRT18	Keratin, type I cytoskeletal 18	6.1225	7.3924	NaN	5.0707	1		2	2;3	0.0085303	131.06	82.593
LLPKLDELR	Unmodified	1095.67	A0A0C4DGB6;CON__P02768-1;P02768;B7WNR0;H0YA55;D6RHD5	ALB	Serum albumin	6.2948	6.3302	0.91486	1.9865	3	1	2	3	0.0072926	112.11	46.861	+
SSPGGVYATR	Unmodified	993.488	P08670;B0YJC4;A0A1B0GTT5;A0A1B0GVG8	VIM	Vimentin	6.3656	6.3656	NaN	NaN	1			2	0.19919	70.816	12.034
TVLEAGTQAPEGVAR	Unmodified	1497.78	J3QRM1;Q96JB5-3;Q96JB5-2;Q96JB5;Q96JB5-4	CDK5RAP3	CDK5 regulatory subunit-associated protein 3	6.4845	7.2188	NaN	5.8249	1		1	2	0.006848	128.67	63.327
VVYFGDSMHSDIFPAR	Unmodified	1839.86	Q5TFE4-2;Q5TFE4	NT5DC1	5'-nucleotidase domain-containing protein 1	6.5705	NaN	NaN	6.5705			1	2	0.031853	87.789	1.4445
NVYYNEATGGKYVPR	Unmodified	1729.84	P68371	TUBB4B	Tubulin beta-4B chain	6.6924	5.6373	6.8926	5.7129	1	1	1	3	0.0022507	111.72	56.905
DLEPTVIDEVR	Unmodified	1284.66	Q71U36-2;Q71U36;P68363;F5H5D3;Q9BQE3;F8VVB9;F8VQQ4;P68363-2;A0A1W2PQM2;F8VRK0;F8VX09;F8VWV9;F8VRZ4;F8VS66	TUBA1A;TUBA1B;TUBA1C	Tubulin alpha-1A chain;Tubulin alpha-1B chain;Tubulin alpha-1C chain	6.7021	6.8986	5.7182	6.7021	1	1	1	2	1.1642e-07	152.97	59.417
DLEPGTMDSVR	Unmodified	1218.56	Q5JP53;P07437;A0A0B4J269;Q13509;Q9BUF5;K7EK43;K7ESQ3;G3V5W4;K7EQT3;K7EJ64;K7ERA8;K7EJZ4;G3V2R8;A0A075B724;K7EL29;K7EN98;K7EPE5;G3V3R4;G3V2N6;Q3ZCM7;P68371;P04350;M0R0X0;M0QY85;M0QY37;M0QX14;M0QZL7;M0R278;Q9BVA1;Q13885	TUBB;TUBB3;TUBB6;TUBB8;TUBB4B;TUBB4A;TUBB2B;TUBB2A	Tubulin beta chain;Tubulin beta-3 chain;Tubulin beta-6 chain;Tubulin beta-8 chain;Tubulin beta-4B chain;Tubulin beta-4A chain;Tubulin beta-2B chain;Tubulin beta-2A chain	6.7187	6.7958	6.4875	6.7187	1	1	1	2	0.0004873	121.73	36.521
DLEPTVIDEIR	Unmodified	1298.67	P68366-2;P68366;C9JDL2;C9JEV8;C9JQ00;C9JJQ8	TUBA4A	Tubulin alpha-4A chain	6.8166	6.8166	NaN	NaN	1			2	0.04943	112.75	16.08
RWLQGSQELPR	Unmodified	1368.73	P01876;A0A0G2JMB2;P01877	IGHA1;IGHA2	Ig alpha-1 chain C region;Ig alpha-2 chain C region	6.8253	5.6483	NaN	8.2477	1		1	3	0.059607	107.34	35.248
SESSSKSSQPLASKQEKDGTEKR	Acetyl (N-term)	2535.24	P17096-2;P17096;P17096-3	HMGA1	High mobility group protein HMG-I/HMG-Y	6.9534	6.9534	NaN	NaN	1	1		4	0.00038101	88.071	55.368
TATAPQLDDEEMYSAHMPAHLR	Unmodified	2483.12	Q8WU39;H0Y9L3;D6RII0;Q8WU39-5;Q8WU39-4;Q8WU39-2	MZB1	Marginal zone B- and B1-cell-specific protein	6.9637	7.7447	5.6664	7.469	1	4	1	4	6.8612e-11	123.54	93.814
EAGLETESPVR	Unmodified	1186.58	F8VXK0;J3KN11;F8VU90;Q9NYL4-2;Q9NYL4	FKBP11	Peptidyl-prolyl cis-trans isomerase;Peptidyl-prolyl cis-trans isomerase FKBP11	7.1608	7.2761	7.1608	6.5905	1	1	1	2	0.00055188	134.25	64.422
IDEMQRVKGMTER	2 Oxidation (M);Acetyl (N-term)	1665.78	Q96L91-4;Q96L91-3;Q96L91-5;Q96L91-2;Q96L91	EP400	E1A-binding protein p400	7.279	6.9717	7.5999	NaN	1	1		2	0.013918	111.06	27.66
GDWSQRPEQR	Unmodified	1257.59	C9JU59;E7EMG9;P33241;P33241-3;C9JKF7;E9PBD8;P33241-2;C9JDV1;C9J9B9;C9JNQ1	LSP1	Lymphocyte-specific protein 1	7.3668	7.3668	0.69817	6.7548	1	1	1	3	0.071478	84.213	48.404
MLQQHTVLQGQR	Unmodified	1437.75	C9J167;P54278-2;P54278	PMS2	Mismatch repair endonuclease PMS2	7.6554	7.6554	NaN	NaN	1			3	0.050853	88.155	73.056
SKQEYDESGPSIVHR	Unmodified	1730.82	P63261;P60709;Q6S8J3;Q9BYX7;A5A3E0;P0CG38;P0CG39	ACTG1;ACTB;POTEE;POTEKP;POTEF;POTEI;POTEJ	Actin, cytoplasmic 2;Actin, cytoplasmic 2, N-terminally processed;Actin, cytoplasmic 1;Actin, cytoplasmic 1, N-terminally processed;POTE ankyrin domain family member E;Putative beta-actin-like protein 3;Putative beta-actin-like protein 3, N-terminally processed;POTE ankyrin domain family member F;POTE ankyrin domain family member I;POTE ankyrin domain family member J	8.8982	8.8982	NaN	NaN	1			4	0.055889	86.548	51.798
AAAAAATAAAAASIR	Acetyl (N-term)	1298.69	G3V3K9;G3V4I1;G3V5F3;J3KNG4;Q8WVM8	SCFD1	Sec1 family domain-containing protein 1	8.9215	11.657	NaN	6.8277	2	1	1	2	2.138e-80	142.19	98.751
YLTEPVDEYCIQALPEFDGKR	Unmodified	2542.2	P14625	HSP90B1	Endoplasmin	9.2581	4.3739	NaN	19.596	1		1	3	2.1661e-06	98.175	63.333
EYELLCPDNTR	Unmodified	1408.63	E7EQB2;E7ER44;P02788-2;P02788	LTF	Lactotransferrin;Lactoferricin-H;Kaliocin-1;Lactoferroxin-A;Lactoferroxin-B;Lactoferroxin-C	9.264	8.8512	9.6961	NaN	1	1	1	2	0.0027754	140.75	63.927
AVKAPGFGDNR	Unmodified	1130.58	P10809	HSPD1	60 kDa heat shock protein, mitochondrial	9.3188	11.223	NaN	7.7376	1		1	3	0.055679	108.31	61.856
SLADLQNDEVAFR	Unmodified	1476.72	D6RED7;D6RAS7;H0Y8L7;D6RB09;E9PFI5;D6RG13;D6RAT0;P61247;D6RGE0;D6RI02	RPS3A	40S ribosomal protein S3a	9.4252	NaN	NaN	9.4252			1	2	2.7784e-09	167.18	87.52
DLTKVHTECCHGDLLECADDR	Unmodified	2543.08	A0A0C4DGB6;CON__P02768-1;P02768;B7WNR0;C9JKR2;H0YA55;D6RHD5;P02768-2	ALB	Serum albumin	9.5609	NaN	NaN	9.5609			1	4	0.11954	61.942	28.537	+
LEEETARMLAQR	Oxidation (M)	1461.72	O00562-2;O00562	PITPNM1	Membrane-associated phosphatidylinositol transfer protein 1	9.8652	9.8652	NaN	NaN	1			2	0.161	83.998	7.8985
MLSGETAKGDYPLEAVR	Unmodified	1835.91	H3BTN5;P14618-2;P14618;P14618-3;H3BR70;B4DNK4	PKM	Pyruvate kinase;Pyruvate kinase PKM	10.073	11.142	9.1055	NaN	1	1		3	0.0093687	92.575	42.646
SEEMLDLRGAERCQKGGCVPGR	Unmodified	2504.17	Q9BZF2	OSBPL7	Oxysterol-binding protein-related protein 7	10.437	NaN	NaN	10.437			2	3	0.031676	68.952	16.432
AVALDTKGPEIR	Unmodified	1268.71	H3BTN5;P14618-2;P14618;P14618-3;H3BT25;H3BUW1;H3BTJ2;H3BQ34	PKM	Pyruvate kinase;Pyruvate kinase PKM	11.014	15.712	7.7209	NaN	1	1		3	0.016375	120.86	52.723
GTGQKQIWR	Unmodified	1072.58	A0A0A0MS51;A0A0A0MT01;P06396-2;P06396-4;P06396-3;P06396	GSN	Gelsolin	11.34	11.34	NaN	NaN	1			3	0.20162	87.696	49.885	+
NYQPPTVVPGGDLAKVQR	Unmodified	1938.03	Q71U36-2;Q71U36;P68363;F5H5D3;Q9BQE3;P68363-2;Q6PEY2;Q13748;Q13748-2;A0A1W2PQM2;C9J2C0;Q9NY65-2;Q9NY65;V9GZ17;P68366-2;P68366	TUBA1A;TUBA1B;TUBA1C;TUBA3E;TUBA3C;TUBA8;TUBA4A	Tubulin alpha-1A chain;Tubulin alpha-1B chain;Tubulin alpha-1C chain;Tubulin alpha-3E chain;Tubulin alpha-3C/D chain;Tubulin alpha-8 chain;Tubulin alpha-4A chain	11.636	NaN	NaN	11.636	1		1	3	5.4112e-06	113.01	54.2
DSVLDVVR	Unmodified	901.487	Q5JP53;P07437;A0A0B4J269;Q13509;Q5ST81;G3V2A3;Q13509-2;P68371;Q9BVA1;Q13885	TUBB;TUBB3;TUBB4B;TUBB2B;TUBB2A	Tubulin beta chain;Tubulin beta-3 chain;Tubulin beta-4B chain;Tubulin beta-2B chain;Tubulin beta-2A chain	11.697	11.697	11.428	12.591	1	1	1	2	0.097078	93.195	24.409
TILGTVKPNANR	Unmodified	1282.74	G3V3R6;P17931	LGALS3	Galectin;Galectin-3	12.129	16.08	11.833	12.129	1	1	1	3	0.0017719	136.02	72.739
HGDLLECADDR	Unmodified	1299.55	A0A0C4DGB6;CON__P02768-1;P02768;B7WNR0;C9JKR2;H0YA55;D6RHD5;P02768-2;CON__P02769	ALB	Serum albumin	12.383	12.383	NaN	NaN	1			3	0.12106	96.113	44.862	+
MVTGGPWPTR	Unmodified	1100.54	Q8WU39;Q8WU39-3	MZB1	Marginal zone B- and B1-cell-specific protein	12.396	NaN	NaN	12.396			1	2	0.18597	85.731	30.361
TLAIIDPGDSDIIR	Unmodified	1497.8	A0A0B4J213;A0A0C4DH44;E5RI99;P62888	RPL30	60S ribosomal protein L30	12.646	NaN	14.909	10.726		1	1	2	0.048309	105.46	64.736
DLTEFQTNLVPYPR	Unmodified	1691.85	Q71U36-2;Q71U36;P68363;F5H5D3;Q9BQE3;F8VVB9;P68363-2;Q6PEY2;Q13748;Q13748-2;C9J2C0;Q9NY65-2;Q9NY65;C9JDS9;V9GZ17;P68366-2;P68366	TUBA1A;TUBA1B;TUBA1C;TUBA3E;TUBA3C;TUBA8;TUBA4A	Tubulin alpha-1A chain;Tubulin alpha-1B chain;Tubulin alpha-1C chain;Tubulin alpha-3E chain;Tubulin alpha-3C/D chain;Tubulin alpha-8 chain;Tubulin alpha-4A chain	12.656	12.741	13.306	4.2799	1	1	2	2;3	2.1358e-45	194.48	128.76
ANVSVVDLTCR	Unmodified	1232.62	P04406;E7EUT5;P04406-2	GAPDH	Glyceraldehyde-3-phosphate dehydrogenase	12.902	23.292	12.902	7.8818	1	1	1	2	0.00038728	155.11	75.999
VTCPEQDKYR	Unmodified	1294.6	P05164-2;P05164;P05164-3	MPO	Myeloperoxidase;Myeloperoxidase;89 kDa myeloperoxidase;84 kDa myeloperoxidase;Myeloperoxidase light chain;Myeloperoxidase heavy chain	13.273	NaN	NaN	13.273			1	3	0.19759	95.775	44.523
SNLDEDIIAEENIVSR	Unmodified	1815.88	P01024	C3	Complement C3;Complement C3 beta chain;C3-beta-c;Complement C3 alpha chain;C3a anaphylatoxin;Acylation stimulating protein;Complement C3b alpha' chain;Complement C3c alpha' chain fragment 1;Complement C3dg fragment;Complement C3g fragment;Complement C3d fragment;Complement C3f fragment;Complement C3c alpha' chain fragment 2	13.529	12.063	10.152	11.943	2	2	1	2;3	4.6833e-56	226.04	162.82
SVVDLTCR	Unmodified	948.47	P04406;E7EUT5;P04406-2;O14556	GAPDH;GAPDHS	Glyceraldehyde-3-phosphate dehydrogenase;Glyceraldehyde-3-phosphate dehydrogenase, testis-specific	13.591	NaN	12.514	14.76		1	1	2	0.041572	106.04	50.366
MVGMGQKDSYVGDEAQSKR	Unmodified	2084.96	P63261;P60709;A6NL76;I3L3I0;I3L1U9;G5E9R0;C9JFL5;F6UVQ4;F6QUT6;E7EVS6;I3L3R2;J3KT65;C9JTX5;C9JUM1;C9JZR7;F8WB63;B8ZZJ2;K7EM38;P63267;P68032;P62736;P68133	ACTG1;ACTB;ACTA1;ACTG2;ACTA2;ACTC1	Actin, cytoplasmic 2;Actin, cytoplasmic 2, N-terminally processed;Actin, cytoplasmic 1;Actin, cytoplasmic 1, N-terminally processed;Actin, gamma-enteric smooth muscle;Actin, alpha cardiac muscle 1;Actin, aortic smooth muscle;Actin, alpha skeletal muscle	13.68	NaN	19.594	9.5514		1	1	3;4	0.052781	73.953	42.913
TIHLPSPVTAQKYR	Unmodified	1609.89	P13639	EEF2	Elongation factor 2	13.713	13.713	7.6349	15.209	1	1	1	4	0.014364	134.56	76.39
TLNQGEFKELVR	Unmodified	1432.77	P06702	S100A9	Protein S100-A9	15.004	10.443	21.557	NaN	1	1	1	2	0.055086	101.93	46.467
LLNNFYPR	Unmodified	1035.55	P01834	IGKC	Ig kappa chain C region	15.005	NaN	NaN	15.005			1	2	0.059319	124.89	11.476
MLPVADQDQCIR	Unmodified	1444.68	H3BS21;A0A0C4DGL8;J3QLC9;J3QR68;H0Y300;P00738-2;P00738;A0A087WU08	HP	Haptoglobin;Haptoglobin alpha chain;Haptoglobin beta chain	15.133	NaN	NaN	15.133			1	2	0.21367	80.688	36.371
VLSGGTTMYPGIADR	Unmodified	1536.76	P63261;P60709;P63267;P68032;P62736;P63267-2	ACTG1;ACTB;ACTG2;ACTC1;ACTA2	Actin, cytoplasmic 2;Actin, cytoplasmic 2, N-terminally processed;Actin, cytoplasmic 1;Actin, cytoplasmic 1, N-terminally processed;Actin, gamma-enteric smooth muscle;Actin, alpha cardiac muscle 1;Actin, aortic smooth muscle	17.224	17.807	16.66	NaN	1	1		2	3.7634e-37	187.31	116.28
SELAGHQTSAESWGTGR	Unmodified	1772.81	H3BTP7;H3BU31;P36578	RPL4	60S ribosomal protein L4	17.28	NaN	NaN	17.28			1	3	0.15088	70.117	35.433
TIMPKDIQLAR	Unmodified	1284.72	Q71DI3;Q16695;P68431	HIST2H3A;HIST3H3;HIST1H3A	Histone H3.2;Histone H3.1t;Histone H3.1	17.654	19.907	NaN	15.656	1		1	3	0.011134	114.89	78.576
TLGSEGALSPGGVASLLR	Unmodified	1683.92	A0A0G2JPR0;P0C0L5;P0C0L4;F5GXS0;A0A140TA49;A0A140TA44;A0A140TA32;A0A140TA29;A0A0G2JL54;P0C0L4-2	C4B;C4A	Complement C4-B;Complement C4 beta chain;Complement C4-B alpha chain;C4a anaphylatoxin;C4b-B;C4d-B;Complement C4 gamma chain;Complement C4-A;Complement C4 beta chain;Complement C4-A alpha chain;C4a anaphylatoxin;C4b-A;C4d-A;Complement C4 gamma chain	18.348	NaN	NaN	18.348	1		1	2	0.0011367	96.745	38.046
FLDTYPNDETTER	Unmodified	1599.71	D6RDX1;D6RBV2;Q12907;D6RIU4	LMAN2	Vesicular integral-membrane protein VIP36	19.408	24.755	NaN	15.216	1		1	2	0.011009	114.4	35.253
TALWGKVNVDEVGGEALGR	Unmodified	1970.02	P68871;F8W6P5	HBB	Hemoglobin subunit beta;LVV-hemorphin-7;Spinorphin	21.523	25.449	21.523	17.486	1	1	1	3	2.8576e-07	108.75	77.436
CLPSKDYAEVGR	Unmodified	1393.67	H3BS21;A0A0C4DGL8;J3QLC9;J3QR68;H0Y300;P00738-2;P00738;A0A087WU08	HP	Haptoglobin;Haptoglobin alpha chain;Haptoglobin beta chain	22.382	NaN	NaN	22.382			1	3	0.057363	101.35	55.981
NITPAEVGVLVGKDR	Unmodified	1566.87	P07737;I3L3D5	PFN1	Profilin-1	25.595	26.662	NaN	19.077	3	1	3	3	0.0022228	111.81	61.245
GYVDDTQFVR	Unmodified	1198.56	Q5SRN7;A0A140T975;A0A140T955;A0A140T941;A0A140T933;A0A140T8W8;A0A0G2JI36;A0A1W2PS24;A0A1W2PRZ0;A0A1W2PR61;A0A1W2PR11;A0A1W2PQS8;Q9GJ45;A0A1W2PS39;A0A1W2PQD0;A0A1W2PPQ2;A0A1W2PPF8;A0A140T937;A0A140T9Z6;A0A140T9W2;A0A1W2PRT9;A0A1W2PPR8;B0UXQ0;A0A140T9I0;O19617;A0A1W2PSE7;A0A140T9U0;A0A140T962;A0A140T921;Q5SRN5;A0A140T9X5;A0A140T913;A0A140T8Y4;A0A0G2JIF2;A2AEA2;A0A140T9M0;A0A140T9J9;A0A140T9H5;A0A14…	HLA-A;HLA-C;HLA-B;HLA-H;HLA-G3;HLA-G2.2;HLA-E;HLA-G	HLA class I histocompatibility antigen, Cw-16 alpha chain;HLA class I histocompatibility antigen, B-38 alpha chain;HLA class I histocompatibility antigen, B-81 alpha chain;HLA class I histocompatibility antigen, B-59 alpha chain;HLA class I histocompatibility antigen, B-67 alpha chain;HLA class I histocompatibility antigen, B-82 alpha chain;HLA class I histocompatibility antigen, B-35 alpha chain…	27.492	29.666	NaN	25.478	1		1	2	0.09264	109.48	43.405
AGEKGSHEEEYARPPSQR	Unmodified	2026.95	C9K049	HMG20B		27.497	NaN	NaN	27.497			1	3	0.04542	69.935	20.886
PPRDPRPSHPEPRGCGAAPGR	Unmodified	2263.11	Q9BSH4	TACO1	Translational activator of cytochrome c oxidase 1	29.172	36.697	NaN	23.19	1		1	3	0.032705	56.036	6.6412
TCKMSQLER	Oxidation (M);Acetyl (N-term)	1209.55	P06702	S100A9	Protein S100-A9	32.781	34.864	NaN	30.824	1		1	2	0.019011	64.207	18.872
GVTCPEQDKYR	Unmodified	1351.62	P05164-2;P05164;P05164-3	MPO	Myeloperoxidase;Myeloperoxidase;89 kDa myeloperoxidase;84 kDa myeloperoxidase;Myeloperoxidase light chain;Myeloperoxidase heavy chain	33.285	NaN	NaN	33.285			1	3	0.029993	121.36	58.04
ASMVYGSEEPLAR	Unmodified	1408.67	P05164-2;P05164;P05164-3	MPO	Myeloperoxidase;Myeloperoxidase;89 kDa myeloperoxidase;84 kDa myeloperoxidase;Myeloperoxidase light chain;Myeloperoxidase heavy chain	34.718	81.699	29.132	34.718	1	1	1	2	0.0088353	124.67	79.071
TLSSIPVFQR	Unmodified	1146.64	F5H6X6;E9PKU7;Q14697;Q14697-2	GANAB	Neutral alpha-glucosidase AB	41.268	37.221	45.755	NaN	1	1		2	0.013958	128.61	57.265
SGLIYEETR	Unmodified	1066.53	P62805	HIST1H4A	Histone H4	49.346	49.346	40.152	34.209	1	1	1	2	0.0053753	159.58	70.289
GAGDVAFIR	Unmodified	904.477	E7EQB2;E7ER44;P02788-2;P02788	LTF	Lactotransferrin;Lactoferricin-H;Kaliocin-1;Lactoferroxin-A;Lactoferroxin-B;Lactoferroxin-C	54.081	19.794	54.081	54.625	1	1	1	2	0.031545	133.12	68.078
HLPSPVTAQKYR	Unmodified	1395.76	P13639	EEF2	Elongation factor 2	56.892	56.892	89.189	5.3387	1	1	1	3	0.034716	107.11	55.846
TCKMSQLER	Acetyl (N-term)	1193.55	P06702	S100A9	Protein S100-A9	67.603	53.804	67.603	384.73	1	1	1	2	1.2469e-12	114.5	49.251
HWYVGEGMEEGEFSEAR	Unmodified	2011.84	Q71U36-2;Q71U36;P68363;F5H5D3;Q9BQE3;P68363-2;Q6PEY2;Q13748;C9J2C0;Q9NY65-2;Q9NY65;P68366-2;P68366	TUBA1A;TUBA1B;TUBA1C;TUBA3E;TUBA3C;TUBA8;TUBA4A	Tubulin alpha-1A chain;Tubulin alpha-1B chain;Tubulin alpha-1C chain;Tubulin alpha-3E chain;Tubulin alpha-3C/D chain;Tubulin alpha-8 chain;Tubulin alpha-4A chain	85.028	85.028	NaN	NaN	1		1	3	0.00012595	115.38	72.816
VVLQQQLQEAR	Acetyl (N-term)	1352.74	H7C0P0;Q9BV73-2;Q9BV73	CEP250	Centrosome-associated protein CEP250	88.792	NaN	88.792	NaN	1	2	1	2;3	0.038359	110.87	44.18
CLLNNFYPR	Unmodified	1195.58	P01834	IGKC	Ig kappa chain C region	96.438	127.04	NaN	73.209	1		3	2	2.3107e-55	186.67	82.563
AAAAAAAAAAAAAAATATAGPR	Acetyl (N-term)	1779.92	Q96QS3	ARX	Homeobox protein ARX	NaN	NaN	NaN	NaN	1			2	0.047473	78.548	27.762
AAAAAAAAAAGAAGGR	Acetyl (N-term)	1239.63	Q86U42-2;Q86U42	PABPN1	Polyadenylate-binding protein 2	NaN	NaN	NaN	NaN	2	1	1	2	8.0976e-57	196.52	107.27
AAAAAAAAAGAAGGR	Acetyl (N-term)	1168.59	Q86U42-2;Q86U42	PABPN1	Polyadenylate-binding protein 2	NaN	NaN	NaN	NaN	1			2	0.0019692	116.3	28.997
AAAAAAAGDSDSWDADAFSVEDPVR	Acetyl (N-term)	2506.09	O75822-2;O75822-3;O75822	EIF3J	Eukaryotic translation initiation factor 3 subunit J	NaN	NaN	NaN	NaN	1	1		3	0.0067542	68.552	47.956
AAAAAAAPSGGGGGGEEER	Acetyl (N-term)	1626.72	B5MCB4;P51608-2	MECP2		NaN	NaN	NaN	NaN	1	1	1	2	3.5178e-05	100.55	68.223
AAAAAAGAGPEMVR	Acetyl (N-term)	1283.63	P28482-2;P28482	MAPK1	Mitogen-activated protein kinase 1	NaN	NaN	NaN	NaN	1	1	1	2	0.0069089	117.71	63.931
AAAAAAGEAR	Acetyl (N-term)	899.446	D6RHJ7;B7Z415;D6RGG7;P09417-2;P09417	QDPR	Dihydropteridine reductase	NaN	NaN	NaN	NaN	1	1	1	2	0.016081	118.33	22.425
AAAAAAPSGGGGGGEEER	Acetyl (N-term)	1555.69	B5MCB4;P51608-2	MECP2		NaN	NaN	NaN	NaN	1			2	0.17031	66.393	32.517
AAAAAETPEVLR	Acetyl (N-term)	1239.65	Q9NXW9-2;Q9NXW9	ALKBH4	Alpha-ketoglutarate-dependent dioxygenase alkB homolog 4	NaN	NaN	NaN	NaN		1	1	2	0.045285	104.42	40.003
AAAAAGAGPEMVR	Acetyl (N-term)	1212.59	P28482-2;P28482	MAPK1	Mitogen-activated protein kinase 1	NaN	NaN	NaN	NaN	1			2	0.10308	87.806	46.777
AAAAAGLGGGGAGPGPEAGDFLAR	Acetyl (N-term)	2052	P23610	F8A1	Factor VIII intron 22 protein	NaN	NaN	NaN	NaN	2	3	1	2;3	5.3925e-14	107.47	71.995
AAAAAGTATSQR	Acetyl (N-term)	1116.55	Q9Y2Z0-2;Q9Y2Z0	SUGT1	Suppressor of G2 allele of SKP1 homolog	NaN	NaN	NaN	NaN	1	1	1	2	1.5562e-21	182.39	107.35
AAAAAMAEQESAR	Acetyl (N-term)	1317.6	Q7L5D6	GET4	Golgi to ER traffic protein 4 homolog	NaN	NaN	NaN	NaN	2	1	1	2	0.0041718	133.89	57.428
AAAAASAPQQLSDEELFSQLR	Acetyl (N-term)	2244.1	Q9Y2U8	LEMD3	Inner nuclear membrane protein Man1	NaN	NaN	NaN	NaN	2	1	2	2;3	1.6941e-222	229.93	155.63
AAAAASASQDELNQLER	Acetyl (N-term)	1785.85	R4GMY1;Q5VYK3	KIAA0368;ECM29	Proteasome-associated protein ECM29 homolog	NaN	NaN	NaN	NaN		1	1	2	4.2697e-22	168.82	108.76
AAAAASGAGGAAGAGTGGAGPAGR	Acetyl (N-term)	1795.86	H0Y494;J3KPC8	SIK3		NaN	NaN	NaN	NaN	1			2	8.29e-149	210.37	164.37
AAAAEGVLATR	Acetyl (N-term)	1070.57	Q6QNY1	BLOC1S2	Biogenesis of lysosome-related organelles complex 1 subunit 2	NaN	NaN	NaN	NaN		1	1	2	8.6542e-92	223.84	143.67
AAAAVGAGHGAGGPGAASSSGGAR	Acetyl (N-term)	1905.9	Q96K37	SLC35E1	Solute carrier family 35 member E1	NaN	NaN	NaN	NaN		1		2	4.1388e-48	167.69	118.41
AAAAVQGGR	Acetyl (N-term)	841.441	E9PL01;A0A087WUC6;E9PI68;Q15005	SPCS2	Signal peptidase complex subunit 2	NaN	NaN	NaN	NaN	1	1	1	2	0.039551	154.09	46.35
AAAAVVEFQR	Acetyl (N-term)	1102.58	J3QRY4;O00231;O00231-2	PSMD11	26S proteasome non-ATPase regulatory subunit 11	NaN	NaN	NaN	NaN	1	2	1	1;2	1.2185e-05	163.99	116.14
AAADGGGPGGASVGTEEDGGGVGHR	Acetyl (N-term)	2178.95	A6NHR9-2;A6NHR9	SMCHD1	Structural maintenance of chromosomes flexible hinge domain-containing protein 1	NaN	NaN	NaN	NaN	1			2	8.2709e-36	150.01	110.83
AAAEEEDGGPEGPNR	Unmodified	1497.63	A0A140TA09;Q99942	RNF5	E3 ubiquitin-protein ligase RNF5	NaN	NaN	NaN	NaN	1			2	0.15574	76.332	35.338
AAAEEEDGGPEGPNR	Acetyl (N-term)	1539.64	A0A140TA09;Q99942	RNF5	E3 ubiquitin-protein ligase RNF5	NaN	NaN	NaN	NaN		1	1	2	0.02617	126.71	92.015
AAAEEGCSVGAEADR	Acetyl (N-term)	1533.64	E9PPB4;B7Z8B3;P40855	PEX19	Peroxisomal biogenesis factor 19	NaN	NaN	NaN	NaN	1		1	2	0.0036512	107.97	68.344
AAAPPSYCFVAFPPR	Acetyl (N-term)	1691.81	B8ZZP4;C9J7U9;C9K052;Q12765;Q12765-2	SCRN1	Secernin-1	NaN	NaN	NaN	NaN	1	1	1	2	0.010265	102.95	59.453
AAAVSESWPELELAER	Acetyl (N-term)	1798.87	Q8N1G4	LRRC47	Leucine-rich repeat-containing protein 47	NaN	NaN	NaN	NaN	1	1		2	0.027471	89.403	45.104
AAEAADLGLGAAVPVELR	Acetyl (N-term)	1763.94	Q5T7U1;Q9Y5Q8-2;Q9Y5Q8;Q9Y5Q8-3	GTF3C5	General transcription factor 3C polypeptide 5	NaN	NaN	NaN	NaN		1		2	5.5841e-08	141.46	80.121
AAEDELQLPR	Acetyl (N-term)	1182.59	P78318	IGBP1	Immunoglobulin-binding protein 1	NaN	NaN	NaN	NaN	1	1	1	2	0.00072985	158.07	67.366
AAETLNFGPEWLR	Acetyl (N-term)	1544.76	O75420	GIGYF1	PERQ amino acid-rich with GYF domain-containing protein 1	NaN	NaN	NaN	NaN	1			2	0.039989	100.88	34.186
AAGGDHGSPDSYR	Acetyl (N-term)	1330.55	B4DEP1;A0A1W2PRX2;A0A096LP72;A0A096LNY4;A0A096LNY5;A0A1B0GTG9;A0A1B0GWF8;A0A1B0GWJ0;A0A1B0GTJ7;A0A0A6YY92;P30566-2;P30566	ADSL	Adenylosuccinate lyase	NaN	NaN	NaN	NaN	1	1	1	2	0.0090166	123.62	90.778
AAGTLYTYPENWR	Acetyl (N-term)	1582.74	P26641	EEF1G	Elongation factor 1-gamma	NaN	NaN	NaN	NaN	1		1	2	0	330.26	257.62
AAGTSSYWEDLR	Acetyl (N-term)	1396.63	F6RU00;B4DQA8;K7EJC8;E9PCW1;O95249	GOSR1	Golgi SNAP receptor complex member 1	NaN	NaN	NaN	NaN	1	1	1	2	6.5153e-54	198.61	155.75
AAHEWDWFQR	Acetyl (N-term)	1386.61	G3V3D8;Q96JQ2	CLMN	Calmin	NaN	NaN	NaN	NaN	1			2	0.01782	119.62	63.053
AAHSSPWTPLEVGTAGE	Unmodified	1708.81	M0QZQ6	SH2D3A		NaN	NaN	NaN	NaN	1			2	0.022491	85.963	24.313
AAIYGGVEGGGTR	Acetyl (N-term)	1248.61	H7C1L7;H7C3G9;Q9UJ70;Q9UJ70-2	NAGK	N-acetyl-D-glucosamine kinase	NaN	NaN	NaN	NaN	1	1	1	2	3.4196e-14	169.93	114.4
AALGPSSQNVTEYVVR	Acetyl (N-term)	1731.88	M0R0Z3;P35269	GTF2F1	General transcription factor IIF subunit 1	NaN	NaN	NaN	NaN	1	2	2	2	0.00027995	136.38	81.89
AALVLEDGSVLR	Acetyl (N-term)	1283.71	F8VPD4;P27708	CAD	CAD protein;Glutamine-dependent carbamoyl-phosphate synthase;Aspartate carbamoyltransferase;Dihydroorotase	NaN	NaN	NaN	NaN	1			2	6.6805e-13	190.02	122.04
AAMVQHFMWHPLPLVDR	Acetyl (N-term)	2089.04	Q7Z4S9-2;Q7Z4S9	SH2D6	SH2 domain-containing protein 6	NaN	NaN	NaN	NaN		1		2	0.049226	47.288	8.8854
AAPAGGGGSAVSVLAPNGR	Acetyl (N-term)	1649.85	C9JAL9;J3QR50;J3QRW3;Q9BZE9;Q9BZE9-2	ASPSCR1	Tether containing UBX domain for GLUT4	NaN	NaN	NaN	NaN	1	1	1	2	4.0963e-06	105.03	59.2
AAPAQQTTQPGGGKR	Acetyl (N-term)	1508.77	H3BNW0;Q9NXG2	THUMPD1	THUMP domain-containing protein 1	NaN	NaN	NaN	NaN	1	2	1	2	0.0062158	119.34	47.092
AAPGPALCLFDVDGTLTAPR	Acetyl (N-term)	2083.04	H3BR08;H3BM92;H3BV34;H3BT06;H3BNY9;H3BRM0;O15305-2;O15305	PMM2	Phosphomannomutase;Phosphomannomutase 2	NaN	NaN	NaN	NaN		2	1	2	2.2527e-09	116.93	75.875
AAPPGEYFSVGSQVSCR	Acetyl (N-term)	1852.84	K7ELG9;Q3MHD2;Q3MHD2-2	LSM12	Protein LSM12 homolog	NaN	NaN	NaN	NaN	1			2	0.0049274	96.371	62.505
AAQGVGPGPGSAAPPGLEAAR	Acetyl (N-term)	1871.95	B8ZZ87;Q6P582;Q6NZ67	MZT2B;MZT2A	Mitotic-spindle organizing protein 2A;Mitotic-spindle organizing protein 2B	NaN	NaN	NaN	NaN	1			2	0.033368	70.47	37.524
AASAAAAELQASGGPR	Acetyl (N-term)	1468.73	Q9HCN4;Q9HCN4-5;F8WD09	GPN1	GPN-loop GTPase 1	NaN	NaN	NaN	NaN	1			2	0.00028399	136.24	55.409
AASQAVEEMR	Acetyl (N-term)	1132.52	H0Y723;E7EQB9;O15160-2;O15160	POLR1C	DNA-directed RNA polymerases I and III subunit RPAC1	NaN	NaN	NaN	NaN	1			2	0.013861	142.43	81.639
AASQLAALEGVDSGPR	Acetyl (N-term)	1582.8	Q2M2I3	FAM83E	Protein FAM83E	NaN	NaN	NaN	NaN	1	1	1	2	0.00026393	113.25	32.941
AASTDMAGLEESFR	Acetyl (N-term)	1525.67	Q9BW30	TPPP3	Tubulin polymerization-promoting protein family member 3	NaN	NaN	NaN	NaN	1	1		2	2.3698e-05	153.95	91.123
AATAAAVVAEEDTELR	Acetyl (N-term)	1657.82	A0A087WV25;Q8N103-3;O95684-2;O95684	FGFR1OP	FGFR1 oncogene partner	NaN	NaN	NaN	NaN	2	1	2	2	5.0755e-09	155.88	104.62
AATAAEAVASGSGEPR	Acetyl (N-term)	1485.71	E9PNR8;Q9NWT6	HIF1AN	Hypoxia-inducible factor 1-alpha inhibitor	NaN	NaN	NaN	NaN	1	1	1	2	2.5173e-14	201	111.17
AATLILEPAGR	Acetyl (N-term)	1152.65	G3V4F2;A0A087X0W7;A0A087WT95;Q86TX2;P49753	ACOT1;ACOT2	Acyl-coenzyme A thioesterase 1;Acyl-coenzyme A thioesterase 2, mitochondrial	NaN	NaN	NaN	NaN		1	1	2	0.14214	106.42	48.564
AAVLQQVLER	Acetyl (N-term)	1167.66	Q5SWX9;P12270-2;P12270	TPR	Nucleoprotein TPR	NaN	NaN	NaN	NaN	1		1	2	0.0072503	134.05	47.579
AAVPELLQQQEEDR	Acetyl (N-term)	1666.82	U3KQL0;U3KQP5;Q5QPE4;Q5QPE5;Q9Y5X3-2;Q9Y5X3	SNX5	Sorting nexin-5	NaN	NaN	NaN	NaN	1	1		2	6.9837e-59	199.68	151.97
ADDAGLETPLCSEQFGSGEAR	Acetyl (N-term)	2250.97	H3BTA0;H3BS97;H3BR29;H3BSM7;Q96GQ5	C16orf58	RUS1 family protein C16orf58	NaN	NaN	NaN	NaN	1	1	1	2;3	1.0202e-12	106.49	75.52
ADDVDQQQTTNTVEEPLDLIR	Acetyl (N-term)	2441.16	P62310	LSM3	U6 snRNA-associated Sm-like protein LSm3	NaN	NaN	NaN	NaN	3	2	2	2;3	5.2158e-16	124.35	91.493
ADEALAGLDEGALR	Acetyl (N-term)	1441.7	A0A087X1R1;P53814-5;P53814;P53814-6;C9JGQ0;C9JBH9;H7C372;C9JV14;C9JYU8	SMTN	Smoothelin	NaN	NaN	NaN	NaN	1			2	0.010484	107.34	59.638
ADEIDWLDLPGR	Acetyl (N-term)	1440.69	A0A1B0GW03			NaN	NaN	NaN	NaN	1	1	1	2	0.0075515	132.32	68.892
ADFDTYDDR	Acetyl (N-term)	1158.45	Q15056-2;Q15056	EIF4H	Eukaryotic translation initiation factor 4H	NaN	NaN	NaN	NaN		1	1	2	0.14879	99.136	67.375
ADGELNVDSLITR	Acetyl (N-term)	1443.72	C9J9S3;C9JP48;P62140	PPP1CB	Serine/threonine-protein phosphatase;Serine/threonine-protein phosphatase PP1-beta catalytic subunit	NaN	NaN	NaN	NaN	3		2	2	0.0090076	123.67	45.407
ADGQVAELLLR	Acetyl (N-term)	1225.67	K7EK06;K7ER16;Q9Y285-2;Q9Y285	FARSA	Phenylalanine--tRNA ligase alpha subunit	NaN	NaN	NaN	NaN	2	1	1	2	2.5254e-61	206.73	133.85
ADMQNLVER	Oxidation (M);Acetyl (N-term)	1132.52	Q5T0R8;Q5T0S3;Q5T0R7;Q5T0R6;Q5T0R5;Q5T0R4;Q5T0R3;Q5T0R2;Q5T0R1;Q5T0R9;Q01518-2;Q01518	CAP1	Adenylyl cyclase-associated protein;Adenylyl cyclase-associated protein 1	NaN	NaN	NaN	NaN	2	1	1	2	0.10209	117.01	38.75
ADMQNLVER	Acetyl (N-term)	1116.52	Q5T0R8;Q5T0S3;Q5T0R7;Q5T0R6;Q5T0R5;Q5T0R4;Q5T0R3;Q5T0R2;Q5T0R1;Q5T0R9;Q01518-2;Q01518	CAP1	Adenylyl cyclase-associated protein;Adenylyl cyclase-associated protein 1	NaN	NaN	NaN	NaN	1	1	1	2	2.0768e-29	191.17	59.951
ADSELQLVEQR	Acetyl (N-term)	1328.66	H3BSW3;H3BQF1;H3BQZ9;H3BQB1;P07741-2;P07741	APRT	Adenine phosphoribosyltransferase	NaN	NaN	NaN	NaN		2	1	1;2	2.631e-177	256.47	163.04
ADSGEGDFLAEGGGVR	Acetyl (N-term)	1577.7	P02671-2;P02671;A0A087WUA0	FGA	Fibrinogen alpha chain;Fibrinopeptide A;Fibrinogen alpha chain	NaN	NaN	NaN	NaN		1		2	0.018305	92.781	46.952
ADTQYILPNDIGVSSLDCR	Acetyl (N-term)	2178.03	E9PQF2;E9PKK8;E9PPK9;G3V1D3;G3V180;Q9NY33-2;Q9NY33-4;Q9NY33	DPP3	Dipeptidyl peptidase 3	NaN	NaN	NaN	NaN		2	2	2;3	9.0697e-09	143.86	93.649
ADVFPGNDSTASQDVANR	Acetyl (N-term)	1904.85	J3KRN5;P17252	PRKCA	Protein kinase C alpha type	NaN	NaN	NaN	NaN	2	1	1	2;3	5.1592e-06	106.58	59.734
AEAALLLLPEAAAER	Acetyl (N-term)	1578.86	Q96JB2-2;Q96JB2	COG3	Conserved oligomeric Golgi complex subunit 3	NaN	NaN	NaN	NaN	1	1	1	2	0.016219	118.48	30.067
AEAEGVPTTPGPASGSTFR	Acetyl (N-term)	1872.89	K7ENZ6;K7EMF4;K7ELM8;K7EJ34;K7ENF4;Q86VR2	FAM134C	Protein FAM134C	NaN	NaN	NaN	NaN	1	1		2;3	0.030901	89.959	41.955
AEAGAGLSETVTETTVTVTTEPENR	Acetyl (N-term)	2604.24	O60927	PPP1R11	Protein phosphatase 1 regulatory subunit 11	NaN	NaN	NaN	NaN	1			3	1.5292e-09	94.542	68.625
AEAVTADSEVLEER	Unmodified	1517.72	F8WAU6;F8WB00;F8WC42;C9JR82;C9JU35;G3XA94;Q9NPL8	TIMMDC1	Complex I assembly factor TIMMDC1, mitochondrial	NaN	NaN	NaN	NaN		1	1	2	0.033731	107.11	33.332
AECPTLGEAVTDHPDR	Acetyl (N-term)	1808.8	G3V4T4;P56279	TCL1A	T-cell leukemia/lymphoma protein 1A	NaN	NaN	NaN	NaN		1	1	2	0.00093368	104.59	65.788
AEDGSVIDYELIDQDAR	Unmodified	1907.87	H0YMD0;H0YMU9;H0YM50;H0YN42;P07355;P07355-2;H0YN28;H0YL33;H0YNP5;H0YNA0	ANXA2	Annexin;Annexin A2	NaN	NaN	NaN	NaN	2	3		2	2.96e-39	173.68	101.24
AEELVLER	Acetyl (N-term)	999.524	A2A2A0;A2A299;P21980-3;P21980-2;P21980	TGM2	Protein-glutamine gamma-glutamyltransferase 2	NaN	NaN	NaN	NaN		1		2	9.4495e-16	182.68	51.914
AELGEADEAELQR	Acetyl (N-term)	1471.68	E9PIR3;G3XAN8;Q9Y5J9	TIMM8B	Mitochondrial import inner membrane translocase subunit Tim8 B	NaN	NaN	NaN	NaN	1	1	1	2	1.0264e-22	181.53	116.37
AELQMLLEEEIPSGKR	Acetyl (N-term)	1883.97	B6VEX4;A0A0A0MRT6;Q8IZP0-11;Q8IZP0-10;Q8IZP0-8;Q8IZP0-7;Q8IZP0-2;Q8IZP0-4;Q8IZP0-3;Q8IZP0-5;Q8IZP0-6;Q8IZP0-9;Q8IZP0-12;Q8IZP0	ABI1	Abl interactor 1	NaN	NaN	NaN	NaN	1			2	0.00087271	104.87	56.125
AELQQLQEFEIPTGR	Acetyl (N-term)	1799.91	Q9P2A4-2;Q9P2A4	ABI3	ABI gene family member 3	NaN	NaN	NaN	NaN	2	2	1	2;3	0.0012609	148.13	95.882
AELSEEALLSVLPTIR	Acetyl (N-term)	1781.98	F5H571;P45974-2;P45974	USP5	Ubiquitin carboxyl-terminal hydrolase 5	NaN	NaN	NaN	NaN	1		1	2	0.0013647	102.66	48.518
AEMDPVAEFPQPPGAAR	Acetyl (N-term)	1823.85	Q5VVM2;Q5VVM3;Q9HAB8	PPCS	Phosphopantothenate--cysteine ligase	NaN	NaN	NaN	NaN	1			2	0.049781	98.803	62.132
AENPSLENHR	Acetyl (N-term)	1207.56	O00505	KPNA3	Importin subunit alpha-4	NaN	NaN	NaN	NaN			1	2	0.017614	126.24	68.384
AENSESLGTVPEHER	Acetyl (N-term)	1695.77	B1AP46;E7EW84;Q8TAG9	EXOC6	Exocyst complex component 6	NaN	NaN	NaN	NaN	1	1	1	2	0.0021833	111.94	58.856
AEPASVAAESLAGSR	Acetyl (N-term)	1456.72	Q9NQT5-2;Q9NQT5	EXOSC3	Exosome complex component RRP40	NaN	NaN	NaN	NaN	1	1	1	2	0.0031839	108.68	64.915
AEPDYIEDDNPELIR	Acetyl (N-term)	1829.83	F8WCJ2;C9JYP1;C9J6Y8;X6RET8;C9JP05;C9J3Q3;C9J6N5;C9JQ40;C9JW51;A0A1C7CYX8;Q9H098;Q9H098-2	FAM107B	Protein FAM107B	NaN	NaN	NaN	NaN		1		2	0.00231	111.52	64.096
AERPEDLNLPNAVITR	Acetyl (N-term)	1848.97	Q9NRF9	POLE3	DNA polymerase epsilon subunit 3	NaN	NaN	NaN	NaN	1			2	0.012574	95.428	33.34
AESDWDTVTVLR	Acetyl (N-term)	1432.68	O60869-2;O60869-3;O60869	EDF1	Endothelial differentiation-related factor 1	NaN	NaN	NaN	NaN	1		1	2	0.017586	146.11	93.528
AESSESFTMASSPAQR	Acetyl (N-term)	1726.75	F8WDM3;P49736	MCM2	DNA replication licensing factor MCM2	NaN	NaN	NaN	NaN	1		1	2	0.00030361	135.6	82.272
AETVSTQVGTEGGLR	Acetyl (N-term)	1545.76	A0A087WXE2;Q8IZ73-2;Q8IZ73	RPUSD2	RNA pseudouridylate synthase domain-containing protein 2	NaN	NaN	NaN	NaN	1		1	2	0.002297	133.05	59.55
AEVQVLVLDGR	Acetyl (N-term)	1239.68	M0QZU1;A0A096LPE0;P40429	RPL13A	60S ribosomal protein L13a	NaN	NaN	NaN	NaN	3		2	2	0.028302	112.36	61.291
AFAETYPAASSLPNGDCGR	Acetyl (N-term)	2024.89	P30520	ADSS	Adenylosuccinate synthetase isozyme 2	NaN	NaN	NaN	NaN	1	1	1	2	0.00020766	104.17	65.215
AGAGSAAVSGAGTPVAGPTGR	Acetyl (N-term)	1752.88	O95295	SNAPIN	SNARE-associated protein Snapin	NaN	NaN	NaN	NaN	1	2	1	2;3	2.8345e-60	185.95	101.26
AGAPTVSLPELR	Acetyl (N-term)	1251.68	Q8NFU3-3;Q8NFU3	TSTD1	Thiosulfate sulfurtransferase/rhodanese-like domain-containing protein 1	NaN	NaN	NaN	NaN	1	1	1	2	0.00036289	153.05	61.192
AGGEAGVTLGQPHLSR	Acetyl (N-term)	1590.81	H7BZU1;F8W810;Q2VIR3-2;Q2VIR3;P41091	EIF2S3;EIF2S3L	Putative eukaryotic translation initiation factor 2 subunit 3-like protein;Eukaryotic translation initiation factor 2 subunit 3	NaN	NaN	NaN	NaN	1	1	1	2	7.9318e-70	201.04	141.47
AGGGAGDPGLGAAAAPAPETR	Acetyl (N-term)	1804.87	Q13637	RAB32	Ras-related protein Rab-32	NaN	NaN	NaN	NaN	1			2	0.023278	83.633	50.774
AGLELLSDQGYR	Acetyl (N-term)	1362.68	E9PPI9;Q9NPD3	EXOSC4	Exosome complex component RRP41	NaN	NaN	NaN	NaN	1			2	7.4184e-09	147.95	55.508
AGLGHPAAFGR	Acetyl (N-term)	1094.56	O94760	DDAH1	N(G),N(G)-dimethylarginine dimethylaminohydrolase 1	NaN	NaN	NaN	NaN	1	1	1	2	6.0423e-07	161.9	79.446
AGLSDLELR	Acetyl (N-term)	1014.53	D6RBV0;Q8NC56	LEMD2	LEM domain-containing protein 2	NaN	NaN	NaN	NaN	1	1		2	1.3769e-29	193.28	88.14
AGLTFTSSSGQQTAQR	Unmodified	1638.8	P01024	C3	Complement C3;Complement C3 beta chain;C3-beta-c;Complement C3 alpha chain;C3a anaphylatoxin;Acylation stimulating protein;Complement C3b alpha' chain;Complement C3c alpha' chain fragment 1;Complement C3dg fragment;Complement C3g fragment;Complement C3d fragment;Complement C3f fragment;Complement C3c alpha' chain fragment 2	NaN	NaN	NaN	NaN		1		2	0.0012033	117.09	67.591
AGPLPDEQDFIQAYEEVR	Acetyl (N-term)	2117.99	Q15149-9	PLEC	Plectin	NaN	NaN	NaN	NaN	1			2	0.045029	81.278	46.509
AGSSSLEAVR	Acetyl (N-term)	1017.51	F5H7S3;H7BYY1;H0YK48;B7Z596;P09493-5;H0YN06	TPM1	Tropomyosin alpha-1 chain	NaN	NaN	NaN	NaN		2	1	1;2	0.0058477	151.44	44.842	+
AGTVVLDDVELR	Acetyl (N-term)	1327.7	M0QYS9;P25205;P25205-2	MCM3	DNA replication licensing factor MCM3	NaN	NaN	NaN	NaN		1	2	2	0.018131	123.63	71.047
AILQTAVCTR	Unmodified	1131.61	P16144-5;P16144-4;P16144-2;P16144-3;P16144	ITGB4	Integrin beta-4	NaN	NaN	NaN	NaN	1			2	0.00030669	115.7	51.278
AKLYEIGAGTSEVR	Unmodified	1492.79	A0A0A0MT83;P26440-2;P26440	IVD	Isovaleryl-CoA dehydrogenase, mitochondrial	NaN	NaN	NaN	NaN	1			3	0.074567	94.781	32.615
ALAQQAFEEAR	Unmodified	1232.61	J3KRT0;J3KS23;Q13951;Q13951-2	CBFB	Core-binding factor subunit beta	NaN	NaN	NaN	NaN	1		1	2	0.027013	106.6	41.353
ALCEAAGCGSALLWPR	Acetyl (N-term)	1772.83	F8WF34;Q2TAA2	IAH1	Isoamyl acetate-hydrolyzing esterase 1 homolog	NaN	NaN	NaN	NaN	1	2	1	2;3	0.00027792	113.77	74.258
ALFPAFAGLSEAPDGGSSR	Acetyl (N-term)	1890.91	G3V338;Q9H7Z3	NRDE2	Protein NRDE2 homolog	NaN	NaN	NaN	NaN		1	1	2	1.6515e-06	120.14	72.848
ALLDVCGAPR	Acetyl (N-term)	1112.56	Q5JNW7;A0A140T998;X5D2R7;P28062	PSMB8;PSM8	Proteasome subunit beta type;Proteasome subunit beta type-8	NaN	NaN	NaN	NaN		1	1	2	0.012631	129.47	35.204
ALQVELVPTGEIIR	Acetyl (N-term)	1578.9	O00159	MYO1C	Unconventional myosin-Ic	NaN	NaN	NaN	NaN	1		1	2	0.11094	97.214	51.242
ALSAETESHIYR	Acetyl (N-term)	1417.68	U3KQU4;O14569	CYB561D2	Cytochrome b561 domain-containing protein 2	NaN	NaN	NaN	NaN	2			2	0.013478	114.4	64.207
ALVTDLGTAELAR	Acetyl (N-term)	1370.74	Q86YV0-2;Q86YV0	RASAL3	RAS protein activator like-3	NaN	NaN	NaN	NaN	1	1	1	2	0.0093401	120.99	47.324
AMSSGGSGGGVPEQEDSVLFR	Acetyl (N-term)	2107.95	B4DP61;A0A1W2PRV5;E7EQZ4;Q16637-4;Q16637-2;Q16637-3;Q16637	SMN2;SMN1	Survival motor neuron protein	NaN	NaN	NaN	NaN	1		1	2	0.011329	89.466	52.485
ANDELTPLGR	Unmodified	1084.55	Q08211	DHX9	ATP-dependent RNA helicase A	NaN	NaN	NaN	NaN			1	2	0.08056	93.598	28.794
ANEAYPCPCDIGHR	Acetyl (N-term)	1700.7	Q96DG6	CMBL	Carboxymethylenebutenolidase homolog	NaN	NaN	NaN	NaN	2			2	0.075182	91.313	48.006
APLATVLSNRFGHR	Acetyl (N-term)	1579.86	A0A087WX92;O15403	SLC16A6	Monocarboxylate transporter 7	NaN	NaN	NaN	NaN	1	1		2	0.030248	100.25	31.71
AQALSEEEFQR	Acetyl (N-term)	1348.63	A0A087WT45;A0A075B793;Q4V328-2;Q4V328-4;Q4V328	GRIPAP1	GRIP1-associated protein 1	NaN	NaN	NaN	NaN		1	1	2	0.0023815	150.27	80.455
AQEVSEYLSQNPR	Acetyl (N-term)	1561.74	J3KNE1;D6RGD2;Q9NXV6	CDKN2AIP	CDKN2A-interacting protein	NaN	NaN	NaN	NaN	1	1	1	2	0.0002419	153.95	97.314
AQMTEDAVDAER	Unmodified	1334.58	P01024	C3	Complement C3;Complement C3 beta chain;C3-beta-c;Complement C3 alpha chain;C3a anaphylatoxin;Acylation stimulating protein;Complement C3b alpha' chain;Complement C3c alpha' chain fragment 1;Complement C3dg fragment;Complement C3g fragment;Complement C3d fragment;Complement C3f fragment;Complement C3c alpha' chain fragment 2	NaN	NaN	NaN	NaN	1		1	2	0.055086	101.93	28.147
AQPPPDVEGDDCLPAYR	Acetyl (N-term)	1940.86	G3V0I9;A0A0J9YXZ6;A0A0J9YY83;A0A0J9YWI0;Q4VXZ8;Q9NUI1-2;Q9NUI1	DECR2	Peroxisomal 2,4-dienoyl-CoA reductase	NaN	NaN	NaN	NaN	1			2	0.0049901	96.306	65.434
AQQKNLEGYVGFANLPNQVYR	Acetyl (N-term)	2450.23	Q16181-2;Q16181;A0A0U1RQK0;A0A0U1RRD1	2019-09-07	Septin-7	NaN	NaN	NaN	NaN			1	3	0.087439	76.329	29.125
AQVAMSTLPVEDEESSESR	Acetyl (N-term)	2105.94	C9J6M0;P78347-5;P78347-2;P78347-4;P78347-3;P78347	GTF2I	General transcription factor II-I	NaN	NaN	NaN	NaN	1			2	0.0046141	87.18	53.001
AQWNQLQQLDTR	Acetyl (N-term)	1541.76	K7EP08;P40763-3;P40763-2;P40763	STAT3	Signal transducer and activator of transcription 3	NaN	NaN	NaN	NaN	1	1	1	2	0.011567	148.56	85.481
ASAGDTQAGPR	Acetyl (N-term)	1071.49	O95716	RAB3D	Ras-related protein Rab-3D	NaN	NaN	NaN	NaN	1			2	0.04541	109.83	18.565
ASALEQFVNSVR	Acetyl (N-term)	1361.69	J3QL22;J3QS85;J3KTQ1;J3QKR0;C9JLV5;Q9UNS2	COPS3	COP9 signalosome complex subunit 3	NaN	NaN	NaN	NaN	1	1	1	2	0.0047511	151.15	88.072
ASATAPAAAVPTLASPLEQLR	Acetyl (N-term)	2076.12	H3BUF4;H3BQA6;H3BR23;O95273-2;O95273	CCNDBP1	Cyclin-D1-binding protein 1	NaN	NaN	NaN	NaN	1	2	1	2;3	5.0139e-16	147.56	76.997
ASAVSPANLPAVLLQPR	Acetyl (N-term)	1744.98	A6NEM2;P51610-3;P51610-2;P51610;P51610-4	HCFC1	Host cell factor 1;HCF N-terminal chain 1;HCF N-terminal chain 2;HCF N-terminal chain 3;HCF N-terminal chain 4;HCF N-terminal chain 5;HCF N-terminal chain 6;HCF C-terminal chain 1;HCF C-terminal chain 2;HCF C-terminal chain 3;HCF C-terminal chain 4;HCF C-terminal chain 5;HCF C-terminal chain 6	NaN	NaN	NaN	NaN	1	1	2	2;3	0.012216	108.32	68.451
ASEGTNIPSPVVR	Acetyl (N-term)	1367.7	A0A0J9YXY2;A0A0J9YW70;C9JVI3;A0A0J9YX34;Q9C040;Q9C040-2	TRIM2	Tripartite motif-containing protein 2	NaN	NaN	NaN	NaN	1		1	2	0.027384	104.79	41.512
ASGAQIVSR	Acetyl (N-term)	929.493	Q96DN2;B4DY31	VWCE	von Willebrand factor C and EGF domain-containing protein	NaN	NaN	NaN	NaN	1			2	0.16286	95.909	10.994
ASGGSGGVSVPALWSEVNR	Acetyl (N-term)	1870.92	R4GNC1;O76094-2;O76094	SRP72	Signal recognition particle subunit SRP72	NaN	NaN	NaN	NaN	1		1	2	2.8299e-64	190.57	147.26
ASGVQVADEVCR	Acetyl (N-term)	1331.61	F6RFD5;P60981	DSTN	Destrin	NaN	NaN	NaN	NaN	1	1	2	2	2.7247e-41	196.44	110.77
ASILDEYENSLSR	Acetyl (N-term)	1537.73	H0YMC9;H0YLM6;Q9P253	VPS18	Vacuolar protein sorting-associated protein 18 homolog	NaN	NaN	NaN	NaN	1	1	1	2	5.4883e-09	166.69	109.78
ASLEAAIADAEQR	Unmodified	1343.67	CON__P05787;P05787;P05787-2;CON__H-INV:HIT000292931	KRT8	Keratin, type II cytoskeletal 8	NaN	NaN	NaN	NaN	1		1	2;3	0.03236	101.38	27.429	+
ASMGTLAFDEYGR	Acetyl (N-term)	1458.64	D6RIZ7;E7ENZ3;P48643	CCT5	T-complex protein 1 subunit epsilon	NaN	NaN	NaN	NaN	1	1	1	2	1.0104e-125	229.82	179.01
ASNNTASIAQAR	Acetyl (N-term)	1244.61	G3V2C9;G3V415;G3V3J9;G3V2N0;P59768	GNG2	Guanine nucleotide-binding protein subunit gamma;Guanine nucleotide-binding protein G(I)/G(S)/G(O) subunit gamma-2	NaN	NaN	NaN	NaN		1	1	2	1.0043e-07	161.17	79.626
ASSAQSGGSSGGPAVPTVQR	Acetyl (N-term)	1841.89	Q7KZF4	SND1	Staphylococcal nuclease domain-containing protein 1	NaN	NaN	NaN	NaN	1	2	2	2;3	1.5255e-20	156.24	94.683
ASSEQAEQPSQPSSTPGSENVLPR	Acetyl (N-term)	2524.17	O75381-2;O75381	PEX14	Peroxisomal membrane protein PEX14	NaN	NaN	NaN	NaN		1	1	3	0.0013443	86.625	49.987
ASSSGNDDDLTIPR	Acetyl (N-term)	1488.67	Q01658	DR1	Protein Dr1	NaN	NaN	NaN	NaN	1		1	2	0.052256	92.943	47.345
ASSVGNVADSTEPTKR	Acetyl (N-term)	1659.81	O15294	OGT	UDP-N-acetylglucosamine--peptide N-acetylglucosaminyltransferase 110 kDa subunit	NaN	NaN	NaN	NaN	2	2		2	0.002716	132.86	67.621
ASTVEGGDTALLPEFPR	Acetyl (N-term)	1800.89	O15254-2;O15254	ACOX3	Peroxisomal acyl-coenzyme A oxidase 3	NaN	NaN	NaN	NaN	1	1	1	2	2.0131e-06	149.69	46.48
ASYYEILDVPR	Acetyl (N-term)	1366.68	C9J1G2;E7ETU0;C9JX00;C9JRD2;C9JXB9;P25686-2;P25686	DNAJB2	DnaJ homolog subfamily B member 2	NaN	NaN	NaN	NaN	1		1	2	0.037104	111.06	72.971
ATALSEEELDNEDYYSLLNVR	Acetyl (N-term)	2485.15	B1AK20;Q9NVH1-3;Q9NVH1-2;Q9NVH1	DNAJC11	DnaJ homolog subfamily C member 11	NaN	NaN	NaN	NaN	1			3	3.8383e-10	109.13	78.348
ATATPVPPR	Acetyl (N-term)	950.519	A0A0D9SFY5;A0A0D9SFE5;E9PBF6;P20700	LMNB1	Lamin-B1	NaN	NaN	NaN	NaN		1	1	2	0.032793	134.81	72.152
ATEEFIIR	Acetyl (N-term)	1019.53	Q14764;H3BPZ2;H3BNF2;H3BUP3;H3BQE7;H3BP76;H3BUK7;H3BNF6;H3BRL2;H3BQK6	MVP	Major vault protein	NaN	NaN	NaN	NaN	1	1	1	2	7.9701e-94	231.86	143.22
ATGLGEPVYGLSEDEGESR	Acetyl (N-term)	2006.91	Q96PU5-3;Q96PU5-2;Q96PU5-5;Q96PU5	NEDD4L	E3 ubiquitin-protein ligase NEDD4-like	NaN	NaN	NaN	NaN	1	1	1	2	7.5751e-07	107.65	57.711
ATNIEQIFR	Acetyl (N-term)	1132.59	P18583-8;P18583-6;P18583-2;P18583-10;P18583-3;P18583-4;P18583-7;P18583;P18583-5;P18583-9;J3QSZ5	SON	Protein SON	NaN	NaN	NaN	NaN	1		1	2	0.13278	101.43	57.661
ATQADLMELDMAMEPDR	3 Oxidation (M);Acetyl (N-term)	2025.83	E9PDF9;E7EV28;E7EMJ5;P35222	CTNNB1	Catenin beta-1	NaN	NaN	NaN	NaN	1	2	1	2	0.043701	83.53	55.617
ATQADLMELDMAMEPDR	Oxidation (M);Acetyl (N-term)	1993.84	E9PDF9;E7EV28;E7EMJ5;P35222	CTNNB1	Catenin beta-1	NaN	NaN	NaN	NaN	3	3	2	2	1.204e-31	175.29	134.7
ATQADLMELDMAMEPDR	Acetyl (N-term)	1977.85	E9PDF9;E7EV28;E7EMJ5;P35222	CTNNB1	Catenin beta-1	NaN	NaN	NaN	NaN	1	1	1	2	8.0655e-15	161.76	120.36
ATQVEPLLPGGATLLQAEEHGGLVR	Acetyl (N-term)	2597.38	A0A0B4J210;Q6PKG0	LARP1	La-related protein 1	NaN	NaN	NaN	NaN	1	1	1	3	1.0721e-06	95.624	60.782
ATSEQSICQAR	Acetyl (N-term)	1291.58	G3V3G2;G3V535;A0A087WYI2;Q9UI08-5;Q9UI08-2	EVL		NaN	NaN	NaN	NaN	1	1	1	2	1.0247e-17	177.7	124.61
ATSLGSNTYNR	Acetyl (N-term)	1224.57	E5RJW4;Q9NW64-2;Q9NW64	RBM22	Pre-mRNA-splicing factor RBM22	NaN	NaN	NaN	NaN	1			2	0.0049393	146.69	77.779
ATTAELFEEPFVADEYIER	Acetyl (N-term)	2271.06	G3V377;F8W9B8;A0A0A0MSI8;O00471	EXOC5	Exocyst complex component 5	NaN	NaN	NaN	NaN	1			3	0.052866	73.928	43.439
ATTATMATSGSAR	Acetyl (N-term)	1266.59	I3L3H2;P38919	EIF4A3	Eukaryotic initiation factor 4A-III;Eukaryotic initiation factor 4A-III, N-terminally processed	NaN	NaN	NaN	NaN	1	1	1	2	2.1055e-14	171.92	98.676
ATVAANPAAAAAAVAAAAAVTEDR	Acetyl (N-term)	2165.11	G5E9A6;P51784	USP11	Ubiquitin carboxyl-terminal hydrolase;Ubiquitin carboxyl-terminal hydrolase 11	NaN	NaN	NaN	NaN	2	1	1	2;3	4.8216e-20	140.11	98.202
ATVQQLEGR	Acetyl (N-term)	1042.54	Q01469	FABP5	Fatty acid-binding protein, epidermal	NaN	NaN	NaN	NaN	1	1	1	2	1.0642e-19	182.98	54.377
ATYLEFIQQNEER	Acetyl (N-term)	1681.79	Q5QPE2;Q15437	SEC23B	Protein transport protein Sec23B	NaN	NaN	NaN	NaN	1	1	1	2	0.014887	136.02	93.812
AVAAAAAAAGPAGAGGGR	Acetyl (N-term)	1407.72	E5RIX7;Q13884-2;Q13884	SNTB1	Beta-1-syntrophin	NaN	NaN	NaN	NaN	1	1	1	2	2.7529e-07	134.57	95.3
AVETLSPDWEFDR	Acetyl (N-term)	1605.73	F8VYH7;A0A087X256;Q2M389-2;Q2M389	KIAA1033	WASH complex subunit 7	NaN	NaN	NaN	NaN		1		2	0.052463	97.813	49.875
AVNVYSTSVTSDNLSR	Acetyl (N-term)	1753.85	Q15691	MAPRE1	Microtubule-associated protein RP/EB family member 1	NaN	NaN	NaN	NaN	1	1	1	2	0.057984	99.531	61.228
AVSQGVIDQDMATR	Unmodified	1489.72	P15924-2;P15924-3;P15924	DSP	Desmoplakin	NaN	NaN	NaN	NaN	2			2	0.015663	128.85	69.694
AYEPQGGSGYDYSYAGGR	Unmodified	1896.79	P61978-3;P61978;P61978-2;Q5T6W2;S4R359	HNRNPK	Heterogeneous nuclear ribonucleoprotein K	NaN	NaN	NaN	NaN	1	1	1	2	0.00086513	124.12	85.244
CLIPMGITSENVAER	Unmodified	1688.82	C9JDE9;P09110;H0Y4D4	ACAA1	3-ketoacyl-CoA thiolase, peroxisomal	NaN	NaN	NaN	NaN	1			2	0.060477	98.943	38.424
CSGDGGVSYTQGQSPEPR	Unmodified	1880.8	J3KNI2;Q6P1X6	C8orf82	UPF0598 protein C8orf82	NaN	NaN	NaN	NaN	1	1		2	1.1958e-09	178.67	123.27
DCAFLSAFGDVSKPER	Unmodified	1797.84	Q9BS26	ERP44	Endoplasmic reticulum resident protein 44	NaN	NaN	NaN	NaN	1			3	0.050849	103.79	45.471
DDLALLEDLEKQR	Unmodified	1556.8	Q13523	PRPF4B	Serine/threonine-protein kinase PRP4 homolog	NaN	NaN	NaN	NaN	1			3	0.022701	102.87	49.304
DEEDEEELGEEER	Unmodified	1606.61	P39687	ANP32A	Acidic leucine-rich nuclear phosphoprotein 32 family member A	NaN	NaN	NaN	NaN	1			2	0.0052338	132.32	80.878
DEEEEEEEEEEPVKEAPGKR	Unmodified	2386.03	P19338	NCL	Nucleolin	NaN	NaN	NaN	NaN	1			3	5.0446e-09	106.31	64.964
DEENLTQENQDR	Unmodified	1489.63	G3V595;P01011-3;P01011-2;P01011	SERPINA3	Alpha-1-antichymotrypsin;Alpha-1-antichymotrypsin His-Pro-less	NaN	NaN	NaN	NaN	1			2	0.060965	99.343	30.792
DETEVLKEDIIQGFR	Unmodified	1790.9	P13010	XRCC5	X-ray repair cross-complementing protein 5	NaN	NaN	NaN	NaN			1	3	0.073381	90.229	50.454
DGEDQTQDTELVETR	Unmodified	1734.75	Q5SRN7;A0A140T975;A0A140T955;A0A140T941;A0A140T933;A0A140T8W8;A0A0G2JI36;A0A1W2PS24;A0A1W2PRZ0;A0A1W2PR61;A0A1W2PR11;A0A1W2PQS8;Q9GJ45;A0A1W2PS39;A0A1W2PQD0;A0A1W2PPQ2;A0A1W2PPF8;A0A140T937;A0A140T9Z6;A0A140T9W2;A0A1W2PRT9;A0A1W2PPR8;B0UXQ0;A0A140T9I0;O19617;A0A1W2PSE7;A0A140T9U0;A0A140T962;A0A140T921;Q5SRN5;A0A140T9X5;A0A140T913;A0A140T8Y4;A0A0G2JIF2;A2AEA2;A0A140T9M0;A0A140T9J9;A0A140T9H5;A0A14…	HLA-A;HLA-C;HLA-B;HLA-H	HLA class I histocompatibility antigen, Cw-16 alpha chain;HLA class I histocompatibility antigen, B-38 alpha chain;HLA class I histocompatibility antigen, B-81 alpha chain;HLA class I histocompatibility antigen, B-59 alpha chain;HLA class I histocompatibility antigen, B-67 alpha chain;HLA class I histocompatibility antigen, B-82 alpha chain;HLA class I histocompatibility antigen, B-35 alpha chain…	NaN	NaN	NaN	NaN	1		1	2	0.025742	123.26	72.972
DGKLVSESSDVLPK	Unmodified	1472.77	CON__P05787;P05787;P05787-2	KRT8	Keratin, type II cytoskeletal 8	NaN	NaN	NaN	NaN	1			2	0.10209	83.314	27.747	+
DIQSPEAEYVDLLLNPER	Unmodified	2100.04	G3V5B3;G3V3E6;Q96HE7	ERO1L	ERO1-like protein alpha	NaN	NaN	NaN	NaN	1			2	0.18291	76.01	23.434
DITEPAVCALR	Unmodified	1243.62	P14923	JUP	Junction plakoglobin	NaN	NaN	NaN	NaN	1			2	0.0095783	109.11	32.283
DLGSSNWEAADLGNEER	Unmodified	1861.81	E9PQA1;E9PM92;O00193	C11orf58;SMAP	Small acidic protein	NaN	NaN	NaN	NaN	1	2		2	0.0023502	117.93	63.966
DSISAASTSDVQDR	Unmodified	1450.65	B5MBZ0;Q9HC35-2;Q9HC35	EML4	Echinoderm microtubule-associated protein-like 4	NaN	NaN	NaN	NaN	1	1	1	2	0.014973	122.51	69.785
DSLLQDGEFSMDLR	Unmodified	1624.74	P07737;K7EJ44	PFN1	Profilin-1	NaN	NaN	NaN	NaN	1			2	0.18254	95.573	49.415
DTLSKPSPMPVSQECFETLR	Unmodified	2321.1	P10645;G5E968	CHGA	Chromogranin-A;Vasostatin-1;Vasostatin-2;EA-92;ES-43;Pancreastatin;SS-18;WA-8;WE-14;LF-19;Catestatin;AL-11;GV-19;GR-44;ER-37;GE-25;Serpinin-RRG;Serpinin;p-Glu serpinin precursor	NaN	NaN	NaN	NaN		1		3	0.024935	86.727	44.01
EALEAARICANKYMVKSCGR	Unmodified	2326.13	Q96L21	RPL10L	60S ribosomal protein L10-like	NaN	NaN	NaN	NaN	1			2	0.086307	65.563	5.6644
EDAIISVLAYR	Unmodified	1248.67	Q6P452;B4E1S2;P09525	ANXA4	Annexin;Annexin A4	NaN	NaN	NaN	NaN			1	2	0.10933	94.692	41.365
EEETAKESTAEKDEL	Unmodified	1707.77	P14625	HSP90B1	Endoplasmin	NaN	NaN	NaN	NaN		1		2	0.12104	78.705	39.124
EMEENFAVEAANYQDTIGR	Unmodified	2185.96	P08670;B0YJC4;B0YJC5	VIM	Vimentin	NaN	NaN	NaN	NaN	1			2	1.0118e-07	135.14	95.024
EMFSDIYKIR	Unmodified	1300.65	E9PJF7;Q5W0H4;A0A0B4J2C3;P13693	TPT1	Translationally-controlled tumor protein	NaN	NaN	NaN	NaN	1			3	0.063181	96.665	36.498
EVQLVESGGGVVRPGGSLR	Unmodified	1895.02	A0A0C4DH32	IGHV3-20		NaN	NaN	NaN	NaN		1		2	0.077343	78.814	0
FDSEPSAVALELPTR	Unmodified	1630.82	P18583-8;P18583-6;P18583-2;P18583-10;P18583-3;P18583-4;P18583-7;P18583;P18583-5;P18583-9	SON	Protein SON	NaN	NaN	NaN	NaN	1			2	0.15537	81.494	37.291
FINDATDVNDALGYVTR	Unmodified	1882.91	A0A087X0S5;P12109	COL6A1	Collagen alpha-1(VI) chain	NaN	NaN	NaN	NaN	1			2	0.13171	82.651	26.608
GAGTYGASSTTSTGR	Unmodified	1372.62	A0A1X7SBZ2;A0A1W2PQ51;Q92841-1;Q92841-3;Q92841-2;Q92841	DDX17	Probable ATP-dependent RNA helicase DDX17	NaN	NaN	NaN	NaN	1			2	0.17652	80.014	24.644
GDYSPDNSAQPGDR	Unmodified	1477.61	H7C1J3;C9JWN1;Q96HY7	DHTKD1	Probable 2-oxoglutarate dehydrogenase E1 component DHKTD1, mitochondrial	NaN	NaN	NaN	NaN	1			2	3.4475e-23	164.04	102.26
GEEAEEEEEEVNR	Unmodified	1547.62	D6REK3;Q6UX04-2;Q6UX04	CWC27	Peptidyl-prolyl cis-trans isomerase CWC27 homolog	NaN	NaN	NaN	NaN	1			2	9.31e-44	221.59	148.09
GELPLDINIQEPR	Acetyl (N-term)	1534.8	S4R3N9;A0A0A0MS41;A0A1P0AYU5;Q9BWM7	SFXN3	Sideroflexin;Sideroflexin-3	NaN	NaN	NaN	NaN		1	1	2	0.011645	113.67	54.971
GESMNTEESNQGSTPSDQQQNKLR	Unmodified	2664.17	G1AUC5;Q6NXS1;P41236	PPP1R2P3;PPP1R2	Protein phosphatase inhibitor 2-like protein 3;Protein phosphatase inhibitor 2	NaN	NaN	NaN	NaN	1	1		3	4.5278e-10	117.55	82.93
GEVTAVEEAPVNACPPGFR	Unmodified	1998.95	O75369-3;O75369;O75369-8;O75369-5;O75369-4	FLNB	Filamin-B	NaN	NaN	NaN	NaN	1	1		2	4.0529e-08	138.42	88.492
GGIGTVPVGR	Unmodified	911.519	A0A087WVQ9;P68104-2;Q5VTE0;P68104;Q05639	EEF1A1;EEF1A1P5;EEF1A2	Elongation factor 1-alpha 1;Putative elongation factor 1-alpha-like 3;Elongation factor 1-alpha 2	NaN	NaN	NaN	NaN			2	2	0.00044163	114.89	65.536
GGTTMYPGIADR	Unmodified	1237.58	P63261;P60709;A6NL76;P63267;P68032;P62736;P68133;P63267-2	ACTG1;ACTB;ACTA1;ACTG2;ACTC1;ACTA2	Actin, cytoplasmic 2;Actin, cytoplasmic 2, N-terminally processed;Actin, cytoplasmic 1;Actin, cytoplasmic 1, N-terminally processed;Actin, gamma-enteric smooth muscle;Actin, alpha cardiac muscle 1;Actin, aortic smooth muscle;Actin, alpha skeletal muscle	NaN	NaN	NaN	NaN	1			2	0.15418	90.108	39.501
GIQADSGPINDTDANPR	Unmodified	1739.81	Q5SVL2;A0A0A0MRL7;P55210-4;P55210;P55210-3	CASP7	Caspase-7;Caspase-7 subunit p20;Caspase-7 subunit p11	NaN	NaN	NaN	NaN	1	2		2	9.6877e-66	188.48	117.54
GKLPEVTKDVER	Unmodified	1369.76	P50454;E9PNX1;E9PK86;E9PMI5;E9PR70;E9PPV6	SERPINH1	Serpin H1	NaN	NaN	NaN	NaN			1	3	0.048035	100.93	43.583
GKLVVECVMNNVTCTR	Unmodified	1878.91	Q01469;I6L8B7	FABP5	Fatty acid-binding protein, epidermal	NaN	NaN	NaN	NaN	1			3	0.15889	80.545	34.755
GLLSQGYSDFINR	Unmodified	1468.73	F1T0B3;A0A087X2G1;Q92499-3;Q92499-2;Q92499	DDX1	ATP-dependent RNA helicase DDX1	NaN	NaN	NaN	NaN			1	2	0.021748	105.98	42.159
GLTDDQVSGPPSAPAEDR	Unmodified	1810.83	Q92734-4;Q92734-3;Q92734-2;Q92734	TFG	Protein TFG	NaN	NaN	NaN	NaN			1	2	0.040734	96.707	31.207
GNFSWGSECCTR	Unmodified	1459.56	P62241	RPS8	40S ribosomal protein S8	NaN	NaN	NaN	NaN			1	2	0.16318	83.862	47.954
GQACQDVDECQPSR	Unmodified	1648.66	P14543	NID1	Nidogen-1	NaN	NaN	NaN	NaN	1			2	0.0022491	138.45	97.285
GQETGKKETIEE	Acetyl (N-term)	1389.66	P41250	GARS	Glycine--tRNA ligase	NaN	NaN	NaN	NaN			1	2	0.12621	86.882	13.648
GQQPNVFNLSGAER	Unmodified	1515.74	O00562-2;O00562;E9PMZ6;E9PMS0;E9PSD1	PITPNM1	Membrane-associated phosphatidylinositol transfer protein 1	NaN	NaN	NaN	NaN			1	2	0.075084	91.867	12.719
GSDCPEAMDLGTLSGIGTLDGFR	Unmodified	2368.07	P02671-2;P02671	FGA	Fibrinogen alpha chain;Fibrinopeptide A;Fibrinogen alpha chain	NaN	NaN	NaN	NaN		1		2	0.0022627	101.39	55.522
GSEAAQLLEAADFAAR	Acetyl (N-term)	1660.81	H0YNP9;Q8N4P3-2;Q8N4P3	HDDC3	Guanosine-3',5'-bis(diphosphate) 3'-pyrophosphohydrolase MESH1	NaN	NaN	NaN	NaN	1	1	2	2;3	3.664e-05	144.57	92.646
GSSTSYADSVKGR	Unmodified	1313.62	A0A0B4J1X5	IGHV3-74		NaN	NaN	NaN	NaN		1		2	0.021618	106.4	59.172
GSTGADAGPCPSLGEAYAR	Unmodified	1835.81	Q0VD83-3;Q0VD83;Q0VD83-4;Q0VD83-2	APOBR	Apolipoprotein B receptor	NaN	NaN	NaN	NaN	2			2	5.0921e-06	133.48	90.854
GTMAEKFDCHYCR	Oxidation (M)	1689.67	Q5JXI2;Q13642-5;Q13642-4	FHL1	Four and a half LIM domains protein 1	NaN	NaN	NaN	NaN		1		2	0.061852	95.523	46.173
GTMPEGTIVCCLEEKPGDR	Unmodified	2147.97	E9PKZ0;E9PKU4;P62917;G3V1A1	RPL8	60S ribosomal protein L8	NaN	NaN	NaN	NaN			1	3	0.14951	63.918	19.111
GTQESCESPDVLDR	Unmodified	1591.68	F8WBF9;Q5TH30;Q9UGV2-3;Q9UGV2-2;Q9UGV2	NDRG3	Protein NDRG3	NaN	NaN	NaN	NaN		1		2	0.031236	101.39	66.693
GVLTVNGPR	Unmodified	911.519	H0YCW8;E9PNH7;A0A024R3B9;E9PR44;P02511	CRYAB	Alpha-crystallin B chain	NaN	NaN	NaN	NaN		1		2	0.0055355	113.41	53.118
ISKLYGSAGPPPTGEEDTAEKDEL	Unmodified	2503.2	P11021	HSPA5	78 kDa glucose-regulated protein	NaN	NaN	NaN	NaN	1			3	0.17731	53.603	6.7254
KEVEIAYSDVAKR	Unmodified	1506.8	Q9Y696	CLIC4	Chloride intracellular channel protein 4	NaN	NaN	NaN	NaN	1			3	0.055358	98.337	48.13
KNLSPDGQYVPR	Unmodified	1372.71	H7C040;B5MC62;Q8TD06	AGR3	Anterior gradient protein 3 homolog	NaN	NaN	NaN	NaN		1		3	0.018324	107.09	56.735
LAKDITSDTSGDFR	Unmodified	1524.74	P04083;Q5T3N1	ANXA1	Annexin A1;Annexin	NaN	NaN	NaN	NaN	2			2;3	0.039814	110.38	70.757
LESAPIIAEHPFVPPSAPTR	Acetyl (N-term)	2170.14	A0A0A0MRA3;A0A0A0MTS7;Q8WZ42-3;Q8WZ42-10;Q8WZ42-9;Q8WZ42-5;Q8WZ42-11;Q8WZ42-4;Q8WZ42-7;Q8WZ42-2;Q8WZ42;Q8WZ42-8;Q8WZ42-13;Q8WZ42-12	TTN	Titin	NaN	NaN	NaN	NaN			1	3	0.019122	78.234	33.095
LGFLGPEDLR	Unmodified	1115.6	A0A087X054;Q9Y4L1;E9PJ21;A0A087WWI4;K7EQK2;Q9Y4L1-2	HYOU1	Hypoxia up-regulated protein 1	NaN	NaN	NaN	NaN	1			2	0.093909	109.11	59.751
LKEKKEVVEEAENGR	Unmodified	1756.93	B8ZZA1;B8ZZW7;H7C2N1;P06454-2;P06454;B8ZZQ6	PTMA	Prothymosin alpha;Prothymosin alpha, N-terminally processed;Thymosin alpha-1	NaN	NaN	NaN	NaN	1	1		3	2.9655e-10	154.13	99.26
LKKLLETECPQYIR	Unmodified	1789.98	P05109	S100A8	Protein S100-A8;Protein S100-A8, N-terminally processed	NaN	NaN	NaN	NaN	1		1	3	3.7403e-09	151.74	86.692
LSDLNAVQMESVR	Unmodified	1460.73	U3KQM0;O15173;O15173-2	PGRMC2	Membrane-associated progesterone receptor component 2	NaN	NaN	NaN	NaN	1			2	0.071288	96.229	35.068
MDAATLTYDTLR	Acetyl (N-term)	1411.67	F2Z2K8;C9JIK8;C9JQ72;Q9Y4P1-6;Q9Y4P1;Q9Y4P1-2	ATG4B	Cysteine protease ATG4B	NaN	NaN	NaN	NaN	1	1	1	2	8.9466e-05	158.47	90.455
MDCEVNNGSSLR	Acetyl (N-term)	1422.59	P55957;P55957-2;B2ZP78;P55957-3	BID	BH3-interacting domain death agonist;BH3-interacting domain death agonist p15;BH3-interacting domain death agonist p13;BH3-interacting domain death agonist p11	NaN	NaN	NaN	NaN			1	2	0.074534	97.813	55.937
MDDEEETYR	Acetyl (N-term)	1228.46	K7EQN2;K7EJ87;A0A087WVZ9;A0A0A0MQR7;P19388	POLR2E	DNA-directed RNA polymerases I, II, and III subunit RPABC1	NaN	NaN	NaN	NaN	1			2	0.0057455	113.26	70.968
MDEQALLGLNPNADSDFR	Oxidation (M);Acetyl (N-term)	2062.93	F5GYW6;F8WDU6;O43592	XPOT	Exportin-T	NaN	NaN	NaN	NaN	1	1		2	0.035858	82.55	47.543
MDEQALLGLNPNADSDFR	Acetyl (N-term)	2046.93	F5GYW6;F8WDU6;O43592	XPOT	Exportin-T	NaN	NaN	NaN	NaN	1	1	1	2	5.9494e-06	106.32	71.317
MDGAGAEEVLAPLR	Acetyl (N-term)	1469.72	P41250;F8WCK4	GARS	Glycine--tRNA ligase	NaN	NaN	NaN	NaN	2		2	2	6.3272e-06	158.56	113.49
MDGASAEQDGLQEDR	Acetyl (N-term)	1662.68	Q08378-4;Q08378-2;Q08378	GOLGA3	Golgin subfamily A member 3	NaN	NaN	NaN	NaN	1	1		2	0.055563	100.19	66.226
MDGAVMEGPLFLQSQR	Acetyl (N-term)	1819.86	Q99704-2;Q99704	DOK1	Docking protein 1	NaN	NaN	NaN	NaN	1	1		2	0.0016166	101.53	62.898
MDGFAGSLDDSISAASTSDVQDR	Acetyl (N-term)	2386.02	B5MBZ0;Q9HC35-2;Q9HC35	EML4	Echinoderm microtubule-associated protein-like 4	NaN	NaN	NaN	NaN	1	2		2;3	9.1725e-08	110.6	88.5
MDHYDSQQTNDYMQPEEDWDR	Acetyl (N-term)	2744.04	P12814-2;P12814;P12814-3;P12814-4	ACTN1	Alpha-actinin-1	NaN	NaN	NaN	NaN	1		2	2	0.024891	100.11	62.557
MDLAAAAEPGAGSQHLEVR	Acetyl (N-term)	1963.94	Q14566	MCM6	DNA replication licensing factor MCM6	NaN	NaN	NaN	NaN	1			2	3.3849e-06	127.36	61.514
MDLYSTPAAALDR	Acetyl (N-term)	1464.69	Q9Y6K5;F8VWK9;F8VS35	OAS3	2'-5'-oligoadenylate synthase 3	NaN	NaN	NaN	NaN			1	2	0.21899	77.64	31.234
MDNLSSEEIQQR	Acetyl (N-term)	1490.67	H3BNG6;H3BU94;H3BNE1;H3BR18;H3BM38;H3BPJ0;O00161-2;O00161	SNAP23	Synaptosomal-associated protein;Synaptosomal-associated protein 23	NaN	NaN	NaN	NaN	1	1	1	2	1.6341e-68	211.64	211.64
MDNYADLSDTELTTLLR	Oxidation (M);Acetyl (N-term)	2027.94	F8WEQ1;Q5HY57;P50402	EMD	Emerin	NaN	NaN	NaN	NaN	1	1	1	2	0.0004088	103.97	72.378
MDNYADLSDTELTTLLR	Acetyl (N-term)	2011.94	F8WEQ1;Q5HY57;P50402	EMD	Emerin	NaN	NaN	NaN	NaN	1	1	1	2	0.015949	89.26	57.101
MDQVMQFVEPSR	Oxidation (M);Acetyl (N-term)	1523.67	P60059	SEC61G	Protein transport protein Sec61 subunit gamma	NaN	NaN	NaN	NaN	2		2	2	0.019701	112.13	58.369
MDQVMQFVEPSR	Acetyl (N-term)	1507.68	P60059	SEC61G	Protein transport protein Sec61 subunit gamma	NaN	NaN	NaN	NaN	1	1	1	2	7.4351e-54	197.73	142.67
MDVGELLSYQPNR	Oxidation (M);Acetyl (N-term)	1578.73	A0A087WUB9;Q8WYA6	CTNNBL1	Beta-catenin-like protein 1	NaN	NaN	NaN	NaN	1			2	0.022571	106.29	45.772
MDVGELLSYQPNR	Acetyl (N-term)	1562.74	A0A087WUB9;Q8WYA6	CTNNBL1	Beta-catenin-like protein 1	NaN	NaN	NaN	NaN	1		1	2	0.00015843	156.12	103.95
MDVNIAPLR	Acetyl (N-term)	1069.56	O75915;F8WF90;C9JQU6;F8WF33	ARL6IP5	PRA1 family protein 3	NaN	NaN	NaN	NaN	1			2	0.10587	113.26	21.349
MEAAAEPGNLAGVR	Acetyl (N-term)	1426.69	H3BRK5;H3BMW1;H3BNF0;Q9Y5Y2	NUBP2	Cytosolic Fe-S cluster assembly factor NUBP2	NaN	NaN	NaN	NaN		1	1	2	0.015758	126.19	56.215
MEAAHLLPAADVLR	Acetyl (N-term)	1547.81	Q93084-4;Q93084-2;Q93084-3;Q93084-7;Q93084;Q93084-6;Q93084-5	ATP2A3	Sarcoplasmic/endoplasmic reticulum calcium ATPase 3	NaN	NaN	NaN	NaN	2	1	2	2;3	0.0066449	110.08	41.541
MEAAHLLPAADVLR	Oxidation (M);Acetyl (N-term)	1563.81	Q93084-4;Q93084-2;Q93084-3;Q93084-7;Q93084;Q93084-6;Q93084-5	ATP2A3	Sarcoplasmic/endoplasmic reticulum calcium ATPase 3	NaN	NaN	NaN	NaN			1	2	0.083863	85.813	43.418
MEDLDQSPLVSSSDSPPR	Acetyl (N-term)	2000.9	Q9NQC3-2;Q9NQC3-5;Q9NQC3;Q9NQC3-4	RTN4	Reticulon-4	NaN	NaN	NaN	NaN	2	2		2	1.0225e-06	139.3	75.822
MEDLGENTMVLSTLR	Acetyl (N-term)	1749.83	C9JIR0;C9JJ38;Q9Y6D9	MAD1L1	Mitotic spindle assembly checkpoint protein MAD1	NaN	NaN	NaN	NaN		1	1	2	0.027595	95.094	40.835
MEDSMDMDMSPLR	Acetyl (N-term)	1598.61	E5RGW4;P06748-3;P06748-2;P06748	NPM1	Nucleophosmin	NaN	NaN	NaN	NaN	1	1	1	2	0.0053901	151.15	114.81
MEDVNSNVNADQEVR	Acetyl (N-term)	1760.76	Q9P270	SLAIN2	SLAIN motif-containing protein 2	NaN	NaN	NaN	NaN		1	1	2	0.0012846	140.39	96.188
MEEGHGLDLTYITER	Acetyl (N-term)	1804.83	C9JWN9;C9JTD0;C9JHU5;E9PCX8;Q68CZ2-4;Q68CZ2-3;Q68CZ2-2;Q68CZ2	TNS3	Tensin-3	NaN	NaN	NaN	NaN	1			2	0.01913	102.97	62.255
MEEVPHDCPGADSAQAGR	Acetyl (N-term)	1967.81	P53384-2;P53384;I3L531	NUBP1	Cytosolic Fe-S cluster assembly factor NUBP1	NaN	NaN	NaN	NaN	1		1	2	0.060811	79.089	44.128
MEGGGGSVAVAGLGAR	Acetyl (N-term)	1429.7	U3KQU7;Q9UP83-3;Q9UP83;Q9UP83-2	COG5	Conserved oligomeric Golgi complex subunit 5	NaN	NaN	NaN	NaN	1	1	1	2	0.00024309	137.59	71.153
MEGLDDGPDFLSEEDR	Acetyl (N-term)	1865.76	G3V2U1;H0YJF8;G3V4Z5;G3V5X9;A0A0A0MRI2;Q9UNH7	SNX6	Sorting nexin-6;Sorting nexin-6, N-terminally processed	NaN	NaN	NaN	NaN	1	1	1	2	0.0001405	108.72	74.826
MEGLDDGPDFLSEEDR	Oxidation (M);Acetyl (N-term)	1881.76	G3V2U1;H0YJF8;G3V4Z5;G3V5X9;A0A0A0MRI2;Q9UNH7	SNX6	Sorting nexin-6;Sorting nexin-6, N-terminally processed	NaN	NaN	NaN	NaN			1	2	0.015068	94.191	61.862
MEGPLSVFGDR	Oxidation (M);Acetyl (N-term)	1264.58	F5GYL4;F5GZI8;F5GZ03;E7ERF2;P17987	TCP1	T-complex protein 1 subunit alpha	NaN	NaN	NaN	NaN	1	1	1	2	0.0063934	132.01	86.929
MEGPLSVFGDR	Acetyl (N-term)	1248.58	F5GYL4;F5GZI8;F5GZ03;E7ERF2;P17987	TCP1	T-complex protein 1 subunit alpha	NaN	NaN	NaN	NaN	1	1	1	2	3.4787e-05	159.79	86.176
MEGSPIPVLTVPTAPYEDQR	Oxidation (M);Acetyl (N-term)	2257.09	Q15124-2;Q15124	PGM5	Phosphoglucomutase-like protein 5	NaN	NaN	NaN	NaN	1	1	2	2;3	7.9541e-09	105.19	61.597
MEGSPIPVLTVPTAPYEDQR	Acetyl (N-term)	2241.1	Q15124-2;Q15124	PGM5	Phosphoglucomutase-like protein 5	NaN	NaN	NaN	NaN	2	1	2	2;3	1.2762e-10	99.011	68.244
MELSAEYLR	Oxidation (M);Acetyl (N-term)	1168.54	H3BV85;H3BTW0;A0A0B4J295;A0A087WZT3;H3BVE0;Q9H3K6-2;Q9H3K6;H3BPT9	BOLA2B;BOLA2	BolA-like protein 2	NaN	NaN	NaN	NaN	1	1		2	0.13216	103.56	57.137
MELSAEYLR	Acetyl (N-term)	1152.55	H3BV85;H3BTW0;A0A0B4J295;A0A087WZT3;H3BVE0;Q9H3K6-2;Q9H3K6;H3BPT9	BOLA2B;BOLA2	BolA-like protein 2	NaN	NaN	NaN	NaN	1		1	2	5.1026e-12	175.38	104
MENSTTTISR	Acetyl (N-term)	1180.54	Q14651;C9JYI1;C9JAM3;C9JVY2;C9JU08;C9J359;C9J0F3	PLS1	Plastin-1	NaN	NaN	NaN	NaN	1	1	2	2	4.7051e-14	178.55	109.76
MEPAEQPSELVSAEGR	Acetyl (N-term)	1770.81	P47224	RABIF	Guanine nucleotide exchange factor MSS4	NaN	NaN	NaN	NaN	1	1		2	0.0018839	100.73	53.298
MEPDGTYEPGFVGIR	Acetyl (N-term)	1708.78	K7EK49;K7EKS1;P36954	POLR2I	DNA-directed RNA polymerase II subunit RPB9	NaN	NaN	NaN	NaN	2	1		2	0.0061299	119.27	52.068
MEPGPDGPAASGPAAIR	Acetyl (N-term)	1634.77	K7EKM4;P19623	SRM	Spermidine synthase	NaN	NaN	NaN	NaN	1			2	0.018469	87.719	45.002
MEQLSSANTR	Acetyl (N-term)	1177.54	P30740	SERPINB1	Leukocyte elastase inhibitor	NaN	NaN	NaN	NaN	1	1	1	2	0.0041264	136.99	73.424
MEQLSSANTR	Oxidation (M);Acetyl (N-term)	1193.53	P30740	SERPINB1	Leukocyte elastase inhibitor	NaN	NaN	NaN	NaN	1			2	0.13814	89.029	22.73
MESALTAR	Acetyl (N-term)	919.443	O00159;I3L168;I3L3F5;I3L4D4;I3L501;I3L3Y6;I3L204;F5H6E2;O00159-2;O00159-3	MYO1C	Unconventional myosin-Ic	NaN	NaN	NaN	NaN	1			2	0.1678	143.11	60.802
MESGAYGAAKAGGSFDLR	Oxidation (M);Acetyl (N-term)	1844.84	K7ELD9;K7ENG9;O43760;O43760-2	SYNGR2	Synaptogyrin-2	NaN	NaN	NaN	NaN			1	2	0.00062631	98.592	55.091
MESGSTAASEEAR	Oxidation (M);Acetyl (N-term)	1382.56	K7EPR5;K7EQK3;K7EMU2;X6RAV4;K7EMZ6;K7EIE5;K7EID3;K7EJ40;K7EK41;K7EPB2;P10644-2;P10644	PRKAR1A	cAMP-dependent protein kinase type I-alpha regulatory subunit;cAMP-dependent protein kinase type I-alpha regulatory subunit, N-terminally processed	NaN	NaN	NaN	NaN	1		1	2	0.0085719	126.19	99.752
MESGSTAASEEAR	Acetyl (N-term)	1366.57	K7EPR5;K7EQK3;K7EMU2;X6RAV4;K7EMZ6;K7EIE5;K7EID3;K7EJ40;K7EK41;K7EPB2;P10644-2;P10644	PRKAR1A	cAMP-dependent protein kinase type I-alpha regulatory subunit;cAMP-dependent protein kinase type I-alpha regulatory subunit, N-terminally processed	NaN	NaN	NaN	NaN	1		1	2	0.017981	138.76	75.546
METILEQQR	Acetyl (N-term)	1188.58	Q12874	SF3A3	Splicing factor 3A subunit 3	NaN	NaN	NaN	NaN	1	1	1	2	3.445e-68	217.02	52.483
METILEQQR	Oxidation (M);Acetyl (N-term)	1204.58	Q12874	SF3A3	Splicing factor 3A subunit 3	NaN	NaN	NaN	NaN			1	2	0.18083	95.815	39.381
MEVLAAETTSQQER	Acetyl (N-term)	1633.76	O75781-2;O75781	PALM	Paralemmin-1	NaN	NaN	NaN	NaN	1	1	1	2	0.0025995	145.09	79.807
MEVTGDAGVPESGEIR	Acetyl (N-term)	1687.77	K7ERT1;O00273-2;O00273	DFFA	DNA fragmentation factor subunit alpha	NaN	NaN	NaN	NaN	1	1	1	2	0.00055102	116.01	51.714
MEVTGDAGVPESGEIR	Oxidation (M);Acetyl (N-term)	1703.77	K7ERT1;O00273-2;O00273	DFFA	DNA fragmentation factor subunit alpha	NaN	NaN	NaN	NaN	2			2	0.073374	93.011	49.926
MFGAGDEDDTDFLSPSGGAR	Acetyl (N-term)	2085.86	X6RKW4;A0A0A0MT60;Q5T1M5-3;Q5T1M5-2;Q5T1M5	FKBP15	Peptidyl-prolyl cis-trans isomerase;FK506-binding protein 15	NaN	NaN	NaN	NaN			1	2	0.026363	75.669	50.816
MFQIPEFEPSEQEDSSSAER	Acetyl (N-term)	2384.01	F5GYS3;A8MXU7;Q92934	BAD	Bcl2-associated agonist of cell death	NaN	NaN	NaN	NaN	1	1		3	4.3738e-09	117.65	117.65
MIEPFGNQYIVAR	Acetyl (N-term)	1578.79	F8WBL6;C9JFJ2;P40879	SLC26A3	Chloride anion exchanger	NaN	NaN	NaN	NaN	1	1		2	0.0085937	126.07	72.311
MLSLQYPDVYR	Oxidation (M);Acetyl (N-term)	1441.69	P48147	PREP	Prolyl endopeptidase	NaN	NaN	NaN	NaN	1		1	2	0.002569	140.45	68.833
MLSLQYPDVYR	Acetyl (N-term)	1425.7	P48147	PREP	Prolyl endopeptidase	NaN	NaN	NaN	NaN	1	1	1	2	0.0028302	145.46	87.862
MLTDSGGGGTSFEEDLDSVAPR	Acetyl (N-term)	2282	D6RHC4;E9PDP5;Q8IWZ3-5;Q8IWZ3-3;Q8IWZ3-2;Q8IWZ3;Q8IWZ3-4;Q8IWZ3-6	ANKHD1	Ankyrin repeat and KH domain-containing protein 1	NaN	NaN	NaN	NaN	1	1		3	0.012967	82.36	49.733
MMCGAPSATQPATAETQHIADQVR	2 Oxidation (M);Acetyl (N-term)	2644.17	A0A1W2PS52;P04080	CSTB	Cystatin-B	NaN	NaN	NaN	NaN	2		1	3	0.0012572	86.707	60.772
MMCGAPSATQPATAETQHIADQVR	Oxidation (M);Acetyl (N-term)	2628.17	A0A1W2PS52;P04080	CSTB	Cystatin-B	NaN	NaN	NaN	NaN	3	2	1	3	2.18e-17	130.37	101.48
MMCGAPSATQPATAETQHIADQVR	Acetyl (N-term)	2612.18	A0A1W2PS52;P04080	CSTB	Cystatin-B	NaN	NaN	NaN	NaN	1	2	2	2;3	6.1002e-16	148.44	148.44
MMEGLDDGPDFLSEEDR	Acetyl (N-term)	1996.8	G3V2U1;H0YJF8;G3V4Z5;G3V5X9;A0A0A0MRI2;Q9UNH7	SNX6	Sorting nexin-6;Sorting nexin-6, N-terminally processed	NaN	NaN	NaN	NaN	1	1	1	2	0.00013635	107.17	74.912
MMLGTEGGEGFVVKVR	2 Oxidation (M);Acetyl (N-term)	1782.86	D6RF17;D6RDL0;E7EQJ0;D6RAM1;D6R9T0;D6RFM3;D6RIT2;E7EN40;D6RIU0;D6RDU3;D6RJ04;D6RIH9;D6RBM0;E9PCY7;G8JLB6;P31943;E5RJ94;D6R9D3;E5RGV0	HNRNPH1	Heterogeneous nuclear ribonucleoprotein H;Heterogeneous nuclear ribonucleoprotein H, N-terminally processed	NaN	NaN	NaN	NaN	1			2	0.11052	84.821	42.485
MNSVGEACTDMKR	Acetyl (N-term)	1539.65	O43715	TRIAP1	TP53-regulated inhibitor of apoptosis 1	NaN	NaN	NaN	NaN	1	1		2	0.028546	104.43	50.368
MNVDHEVNLLVEEIHR	Oxidation (M);Acetyl (N-term)	2003.97	Q5SZC9;Q9P1F3	ABRACL	Costars family protein ABRACL	NaN	NaN	NaN	NaN	1		1	3	7.3559e-09	153.92	98.084
MNVDHEVNLLVEEIHR	Acetyl (N-term)	1987.98	Q5SZC9;Q9P1F3	ABRACL	Costars family protein ABRACL	NaN	NaN	NaN	NaN	1		1	3	0.0099399	92.551	44.885
MNVGTAHSEVNPNTR	Acetyl (N-term)	1667.77	J3QRM9;Q8N138-4;Q8N138	ORMDL3	ORM1-like protein 3	NaN	NaN	NaN	NaN	1			2	0.022522	122.39	73.092
MQDAENVAVPEAAEER	Acetyl (N-term)	1799.8	C9JZG1;P55884;P55884-2	EIF3B	Eukaryotic translation initiation factor 3 subunit B	NaN	NaN	NaN	NaN	1	2	1	2	3.5185e-32	181.76	132.26
MQNDAGEFVDLYVPR	Oxidation (M);Acetyl (N-term)	1810.82	Q9BYK2;Q8WVC2;Q9BYK1;P63220	RPS21	40S ribosomal protein S21	NaN	NaN	NaN	NaN	3	1	1	2	0	285.83	285.83
MQNDAGEFVDLYVPR	Acetyl (N-term)	1794.82	Q9BYK2;Q8WVC2;Q9BYK1;P63220	RPS21	40S ribosomal protein S21	NaN	NaN	NaN	NaN	2	3	1	2	0.0020314	112.43	68.886
NEMLEVVEQRDSLVALLEEQR	Acetyl (N-term)	2541.27	Q7RTP6	MICAL3	Protein-methionine sulfoxide oxidase MICAL3	NaN	NaN	NaN	NaN	1		1	3	0.0062679	52.464	10.025
NFILDQTNVSAAAQR	Unmodified	1646.84	A0A1W2PP35;A0A1X7SBS1;A0A1W2PPS1;Q00839-2;Q00839;A0A1W2PRZ7;A0A1W2PQD4;A0A1W2PQ74;A0A1W2PQL0;A0A1W2PP34;A0A1W2PPL4;A0A1W2PPH7;Q5RI18	HNRNPU	Heterogeneous nuclear ribonucleoprotein U	NaN	NaN	NaN	NaN	1	1		2	0.042394	103.75	49.608
PAGPAGPPGLIGEQGISGPR	Unmodified	1826.96	E7ENL6;P12111-4;P12111-2;P12111	COL6A3	Collagen alpha-3(VI) chain	NaN	NaN	NaN	NaN		1		2	0.037721	81.709	19.894
PFLELDTNLPANR	Acetyl (N-term)	1540.79	J3KQ18;B5MC82;P30046-2;P30046;A6NHG4	DDT;DDTL	D-dopachrome decarboxylase;D-dopachrome decarboxylase-like protein	NaN	NaN	NaN	NaN	1	1		2	0.0091228	122.96	57.336
PNMEAYAVSPGRMR	Oxidation (M);Acetyl (N-term)	1635.75	X6RH99;Q969X2-2;Q969X2;Q969X2-3	ST6GALNAC6	Alpha-N-acetylgalactosaminide alpha-2,6-sialyltransferase 6	NaN	NaN	NaN	NaN	1			2	0.016215	125.72	52.873
PPSMSSPPPPPALPPMHR	2 Oxidation (M)	1923.93	P41225	SOX3	Transcription factor SOX-3	NaN	NaN	NaN	NaN	1			2	0.039774	97.734	41.329
QQEAALVDMVNDGVEDLR	Unmodified	2000.95	A8MX94;P09211	GSTP1	Glutathione S-transferase P	NaN	NaN	NaN	NaN	1			2	0.11012	83.087	45.066
QQQELPNMFGDLR	Oxidation (M)	1590.75	Q8N370-4			NaN	NaN	NaN	NaN			1	2	0.042661	100.02	7.778
SAADEVDGLGVAR	Acetyl (N-term)	1300.63	A0A0J9YXZ5;P46940;H0YLE8	IQGAP1	Ras GTPase-activating-like protein IQGAP1	NaN	NaN	NaN	NaN	1	2	3	2	3.9799e-08	160.53	53.932
SAAEAGGVFHR	Acetyl (N-term)	1142.55	Q9BRF8-3;Q9BRF8-2;Q9BRF8	CPPED1	Serine/threonine-protein phosphatase CPPED1	NaN	NaN	NaN	NaN	1	1	1	2	2.0494e-110	229.44	122.43
SADAAAGAPLPR	Acetyl (N-term)	1137.58	J3QRP6;O14745	SLC9A3R1	Na(+)/H(+) exchange regulatory cofactor NHE-RF1	NaN	NaN	NaN	NaN	1	1	1	2	6.3203e-09	148.94	83.479
SAELGVGCALR	Acetyl (N-term)	1173.58	E5RFZ4;E5RG77;O94903	PROSC	Proline synthase co-transcribed bacterial homolog protein	NaN	NaN	NaN	NaN	1	1	1	2	0.0022379	145.72	66.953
SAGSWNSGSSGPGSTGNR	Unmodified	1664.71	P02671-2;P02671	FGA	Fibrinogen alpha chain;Fibrinopeptide A;Fibrinogen alpha chain	NaN	NaN	NaN	NaN	2		1	2	7.5146e-24	161.21	102.93
SANEDQEMELEALR	Acetyl (N-term)	1675.74	D6RCM5;D6RDH6;K4DI92;Q6NW29	RWDD4	RWD domain-containing protein 4	NaN	NaN	NaN	NaN	1	1		2	0.015444	115.37	61.805
SAPLDAALHALQEEQAR	Acetyl (N-term)	1860.93	P80217;P80217-2	IFI35	Interferon-induced 35 kDa protein	NaN	NaN	NaN	NaN	2			2;3	0.00051503	102.73	63.17
SAQAGPAAGPGAPGTAAGR	Unmodified	1563.78	P43007	SLC1A4	Neutral amino acid transporter A	NaN	NaN	NaN	NaN		1		2	0.003506	109.83	55.218
SASSLLEQR	Acetyl (N-term)	1031.52	S4R3J8;S4R3V3;Q9Y5A9	YTHDF2	YTH domain-containing family protein 2	NaN	NaN	NaN	NaN	1		1	2	0.02453	156.51	29.486
SASVVSVISR	Acetyl (N-term)	1045.58	F5H895;A0A0B4J239;F5GXX5;P61803	DAD1	Dolichyl-diphosphooligosaccharide--protein glycosyltransferase subunit DAD1	NaN	NaN	NaN	NaN	1	1	1	2	0.00017125	159.79	53.193
SCPGSCPSLSAPEGCESACR	Unmodified	2167.84	A0A087WXI2;Q9Y6R7;A0A087WUZ2	FCGBP	IgGFc-binding protein	NaN	NaN	NaN	NaN	2	1		2	3.1291e-09	120.3	99.073
SDCAFMVDNEAIYDICR	Unmodified	2077.85	Q71U36-2;Q71U36;P68363;F5H5D3;Q9BQE3;F8VVB9;F8VQQ4;Q6PEY2;Q13748;Q13748-2;C9J2C0;Q9NY65-2;Q9NY65;C9JDS9;P68366-2;P68366	TUBA1A;TUBA1B;TUBA1C;TUBA3E;TUBA3C;TUBA8;TUBA4A	Tubulin alpha-1A chain;Tubulin alpha-1B chain;Tubulin alpha-1C chain;Tubulin alpha-3E chain;Tubulin alpha-3C/D chain;Tubulin alpha-8 chain;Tubulin alpha-4A chain	NaN	NaN	NaN	NaN	1			2	0.088073	78.529	46.89
SDFDEFER	Acetyl (N-term)	1085.43	P26368-2;P26368	U2AF2	Splicing factor U2AF 65 kDa subunit	NaN	NaN	NaN	NaN	1	1	1	2	6.0922e-05	173.68	121.04
SDLQAAEGPGSWSPTAR	Acetyl (N-term)	1770.82	Q6PL24	TMED8	Protein TMED8	NaN	NaN	NaN	NaN		1		2	0.033381	104.41	58.53
SDQALEALSASLGTR	Acetyl (N-term)	1559.78	H0Y7F0;H0Y9H6;E9PDE4;E7ES10;E9PCH5;E7EVY3;B7Z574;A0A0C4DGB5;P20810-3;P20810-4;P20810-8;P20810-2;P20810;P20810-9;P20810-5;P20810-10;P20810-7;P20810-6;F8W7E0;E7EQ12;D6RAA8;D6RC54	CAST	Calpastatin	NaN	NaN	NaN	NaN	1	1	1	2	0.0061625	139.48	50.21
SDQQLDCALDLMR	Acetyl (N-term)	1605.71	B1AK85;B1AK88;P47756-2;P47756	CAPZB	F-actin-capping protein subunit beta	NaN	NaN	NaN	NaN	2	2	1	2	8.4425e-05	158.05	85.404
SDQQLDCALDLMR	Oxidation (M);Acetyl (N-term)	1621.71	B1AK85;B1AK88;P47756-2;P47756	CAPZB	F-actin-capping protein subunit beta	NaN	NaN	NaN	NaN	2	1		2	0.059432	96.113	42.62
SDSASVVAPLAPGSEDNFAR	Unmodified	1988.94	A0A0G2JS82;O94973;O94973-2	AP2A2	AP-2 complex subunit alpha-2	NaN	NaN	NaN	NaN	1	1		2	0.022571	119.96	51.427
SDSFGGDAQADEGQAR	Unmodified	1609.66	F8WFD7;B1AHA9;B1AHB1;P33992	MCM5	DNA helicase;DNA replication licensing factor MCM5	NaN	NaN	NaN	NaN	2	1	1	2	1.6893e-118	212.95	165.01
SDTLCTEEVFPTAGAGTDLR	Unmodified	2138.98	B4DJ81;P28331-3;P28331-4;P28331-5;P28331;P28331-2	NDUFS1	NADH-ubiquinone oxidoreductase 75 kDa subunit, mitochondrial	NaN	NaN	NaN	NaN	1			2	0.017157	93.494	65.632
SDTLTADVIGR	Acetyl (N-term)	1188.6	Q15813;Q15813-2	TBCE	Tubulin-specific chaperone E	NaN	NaN	NaN	NaN			1	2	0.0037424	159.34	91.842
SEASSEDLVPPLEAGAAPYR	Acetyl (N-term)	2100	H0YL88;H0YKY9;H0YKI8;Q03169	TNFAIP2	Tumor necrosis factor alpha-induced protein 2	NaN	NaN	NaN	NaN	2	1		2	5.9954e-13	166.38	121.1
SEDFGVNEDLADSDAR	Unmodified	1738.73	P04083	ANXA1	Annexin A1	NaN	NaN	NaN	NaN		1		2	0.035996	86.262	36.796
SEDSSALPWSINR	Acetyl (N-term)	1502.7	F8WBK9;C9JIG9;O95747	OXSR1	Serine/threonine-protein kinase OSR1	NaN	NaN	NaN	NaN	1			2	0.053865	97.472	35.878
SETPAQCSIKQER	Acetyl (N-term)	1574.74	P41212	ETV6	Transcription factor ETV6	NaN	NaN	NaN	NaN	1			2	1.6302e-14	159.09	81.553
SETQNGDVSEETMGSR	Unmodified	1725.71	Q9NVP1	DDX18	ATP-dependent RNA helicase DDX18	NaN	NaN	NaN	NaN	1			2	1.0015e-27	162.67	110.5
SETVICSSR	Acetyl (N-term)	1079.49	P50552;K7EIG8;K7ENR7;K7ENL7	VASP	Vasodilator-stimulated phosphoprotein	NaN	NaN	NaN	NaN	1			2	0.036172	138.06	81.015
SGDHLHNDSQIEADFR	Acetyl (N-term)	1881.82	P11387	TOP1	DNA topoisomerase 1	NaN	NaN	NaN	NaN		1	1	3	0.00019167	110.6	67.812
SGDTQTDATSFYDR	Unmodified	1562.65	K7ELL7;P14314-2;P14314	PRKCSH	Glucosidase 2 subunit beta	NaN	NaN	NaN	NaN	1			2	0.17442	80.871	34.265
SGEPGQTSVAPPPEEVEPGSGVR	Acetyl (N-term)	2304.09	J3KTI2;Q9BRT3	MIEN1	Migration and invasion enhancer 1	NaN	NaN	NaN	NaN	2	1	1	2;3	0.00020894	90.453	37.419
SGFSTEER	Acetyl (N-term)	953.409	Q15181;Q5SQT6	PPA1	Inorganic pyrophosphatase	NaN	NaN	NaN	NaN			1	1	0.17076	135.77	66.383
SGPDVETPSAIQICR	Acetyl (N-term)	1670.79	O00154-2;O00154-3;O00154-4;O00154-7			NaN	NaN	NaN	NaN			1	2	1.9405e-92	204.69	122.4
SGTNLDGNDEFDEQLR	Acetyl (N-term)	1850.79	O43719;Q5H919;Q5H918	HTATSF1	HIV Tat-specific factor 1	NaN	NaN	NaN	NaN	2	1	1	2	0.00018657	163.51	125.49
SIEIESSDVIR	Acetyl (N-term)	1288.65	Q2TAY7	SMU1	WD40 repeat-containing protein SMU1;WD40 repeat-containing protein SMU1, N-terminally processed	NaN	NaN	NaN	NaN		1		2	0.0045356	143.37	58.213
SIMKCDIDIR	Unmodified	1249.62	P63267;P68032;P62736;P68133;P63267-2	ACTG2;ACTC1;ACTA2;ACTA1	Actin, gamma-enteric smooth muscle;Actin, alpha cardiac muscle 1;Actin, aortic smooth muscle;Actin, alpha skeletal muscle	NaN	NaN	NaN	NaN	1			3	0.071526	100.69	36.033
SISSDEVNFLVYR	Acetyl (N-term)	1569.77	C9JCW4;C9JTW8;C9JY82;C9JEC9;C9J3H2;C9J903;A0A0D9SEW5;A0A0D9SFS8;C9J7E1;A0A1B0GUU2;F8W9D8;C9IYU9;A0A0D9SF63;Q9BZK7	TBL1XR1	F-box-like/WD repeat-containing protein TBL1XR1	NaN	NaN	NaN	NaN		1	1	2	0.0073431	180.09	107.77
SISSQLGPIHPPPR	Unmodified	1484.81	A0A087WTP3;Q92945;M0R0I5	KHSRP	Far upstream element-binding protein 2	NaN	NaN	NaN	NaN			1	3	0.14057	83.243	44.798
SLDIQCEELSDAR	Acetyl (N-term)	1576.7	P13489;E9PMJ3;E9PLZ3;E9PIM9;E9PR82;E9PMI1;E9PMA9;E9PMN0;E9PIK5	RNH1	Ribonuclease inhibitor	NaN	NaN	NaN	NaN	1	1		2	0.0082892	127.83	83.406
SLDIQSLDIQCEELSDAR	Acetyl (N-term)	2132.99	P13489;E9PMJ3;E9PLZ3;E9PIM9;E9PR82;E9PMI1;E9PMA9;E9PMN0;E9PIK5	RNH1	Ribonuclease inhibitor	NaN	NaN	NaN	NaN	2	1	2	2;3	3.0559e-07	163.51	107.15
SLGISPDLLPEDFVR	Unmodified	1656.87	M0QZS6;Q9UBE0	SAE1	SUMO-activating enzyme subunit 1;SUMO-activating enzyme subunit 1, N-terminally processed	NaN	NaN	NaN	NaN		1		2	0.07352	90.614	43.011
SLSGAQIDDNIPR	Unmodified	1384.69	Q16555;A0A1C7CYX9;Q16555-2	DPYSL2	Dihydropyrimidinase-related protein 2	NaN	NaN	NaN	NaN	2			2	0.0020102	137.01	57.936
SNASDALDKIR	Unmodified	1188.61	P14625;Q96GW1;A0A1W2PRR1;F8W026;Q58FF8;Q58FF6;P08238;Q58FF7	HSP90B1;HSP90AB2P;HSP90AB4P;HSP90AB1;HSP90AB3P	Endoplasmin;Putative heat shock protein HSP 90-beta 2;Putative heat shock protein HSP 90-beta 4;Heat shock protein HSP 90-beta;Putative heat shock protein HSP 90-beta-3	NaN	NaN	NaN	NaN			1	3	0.17677	86.911	20.315
SQDGASQFQEVIR	Acetyl (N-term)	1505.71	C9J3M0;F2Z3P4;C9J6Q0;F8WC70;F2Z3H1;C9JTZ5;C9JUW1;C9JWG0;C9JVG3;C9JNZ1;A0A087WYS1;E7EUC7;Q16851-2;Q16851	UGP2	UTP--glucose-1-phosphate uridylyltransferase	NaN	NaN	NaN	NaN	1		1	2	0	282.61	200.58
SQFQESDDADEDYGR	Unmodified	1760.68	Q9H1E3	NUCKS1	Nuclear ubiquitous casein and cyclin-dependent kinase substrate 1	NaN	NaN	NaN	NaN	2		1	2	0.0282	126.1	84.992
SQGDSNPAAIPHAAEDIQGDDR	Acetyl (N-term)	2305.02	P68402-3;P68402-2;P68402-4;P68402	PAFAH1B2	Platelet-activating factor acetylhydrolase IB subunit beta	NaN	NaN	NaN	NaN	1			2	1.0036e-07	119.46	80.659
SQGPPNANEDYR	Unmodified	1346.59	Q9UEW8-2;Q9UEW8	STK39	STE20/SPS1-related proline-alanine-rich protein kinase	NaN	NaN	NaN	NaN	1			2	0.044374	101.38	46.658
SQSAAVTPSSTTSSTR	Unmodified	1566.75	Q16186;A0A087WX59	ADRM1	Proteasomal ubiquitin receptor ADRM1	NaN	NaN	NaN	NaN		1		2	0.071484	95.417	47.413
SQSGAVSCCPGATNGSLGR	Acetyl (N-term)	1906.83	E9PNY4;E9PM34;E9PN68;E9PLN2;E9PNT0;E9PLH1;Q9H6S3;Q9H6S3-3	EPS8L2	Epidermal growth factor receptor kinase substrate 8-like protein 2	NaN	NaN	NaN	NaN	1			2	0.00034679	123.72	123.72
SQSTTSDYQWDVSR	Unmodified	1658.72	H0YBJ8;Q86UE4	MTDH	Protein LYRIC	NaN	NaN	NaN	NaN		1		2	0.074772	93.623	56.776
SQVSEILSALER	Unmodified	1330.71	A0A0C4DFX3;Q9Y6C2	EMILIN1	EMILIN-1	NaN	NaN	NaN	NaN	1			2	0.018544	107.03	45.466
SRPPPTGKMPGAPETAPGDGAGASR	Acetyl (N-term)	2403.16	O75116;D6REE7	ROCK2	Rho-associated protein kinase 2	NaN	NaN	NaN	NaN		1		3	0.086622	70.345	37.097
SSAAATGTSTSTPAAPTAR	Unmodified	1704.83	J3KPU7;I3L2F2;I3L4T8;I3L1Y4;I3L1A3;I3L3U9;J3QSV6;O76021	RSL1D1	Ribosomal L1 domain-containing protein 1	NaN	NaN	NaN	NaN	1			2	3.8198e-14	154.13	80.283
SSCSSEVVLSGDDEEYQR	Unmodified	2045.85	Q09666;E9PKR9;E9PLK4	AHNAK	Neuroblast differentiation-associated protein AHNAK	NaN	NaN	NaN	NaN		1		2	0.024918	105.03	61.485
SSEPPPPPQPPTHQASVGLLDTPR	Acetyl (N-term)	2546.28	H3BTK3;I3L3X8;H3BSW7;H3BUY4;H3BPY5;H3BNU9;Q9Y2V2	CARHSP1	Calcium-regulated heat stable protein 1	NaN	NaN	NaN	NaN	2	1	1	3	0.0090648	71.651	39.616
[truncated: 53 more rows]

## Sheet: Supplementary Table 2
Supplementary Table 2 | N-terminomics TAILS peptides significantly elevated from the healthy colon biopsies.
Peptide sequences were identified from the the human UniProt protein database with appended standard laboratory and common contamination protein entries and reverse decoy sequences (in total 177,324 entries) using the Andromeda algorithm as implemented in the MaxQuant software package v1.6.0.1, using an peptide FDR of 0.01. Search parameters included a mass tolerance of 1 ppm for the parent ion a…
Accession	Input Sequence	Recommended Protein Name	Other Names and IDs	Species	Chromosome	P10 to P1	P1' to P10'	P1' Position	Full protein length (aa)	Expected start (pos 1,2, or after signal-, pro-, or transit-peptide)	UniProt curated start	Alternative Spliced Start	Cleaving proteases	Other experimental terminus evidences	Distance To signal peptide
Q9P212	FMDQSDIETMR	1-phosphatidylinositol 4,5-bisphosphate phosphodiesterase epsilon-1	PLCE1;1-phosphatidylinositol 4,5-bisphosphate phosphodiesterase epsilon-1;Pancreas-enriched phospholipase C ;Phosphoinositide phospholipase C-epsilon-1 ;Phospholipase C-epsilon-1 Short=PLC-epsilon-1;PLCE1;	(Human)	10	RSRKVLKMWQ	FMDQSDIETM	662	2302
P31947	SHLIKEAGDAESR	14-3-3 protein sigma	SFN;14-3-3 protein sigma;Epithelial cell marker protein 1 ;Stratifin;1433S;	(Human)	1	VCDTVLGLLD	SHLIKEAGDA	105	248				MEP1B;MEP1A
P09110	GAAAILLAR	3-ketoacyl-CoA thiolase, peroxisomal	ACAA1;3-ketoacyl-CoA thiolase, peroxisomal;Acetyl-CoA acyltransferase ;Beta-ketothiolase ;Peroxisomal 3-oxoacyl-CoA thiolase;THIK;	(Human)	3	TAGNSSQVSD	GAAAILLARR	281	424						254
Q13405	SQTQGPPDYPR	39S ribosomal protein L49, mitochondrial	MRPL49;39S ribosomal protein L49, mitochondrial;Neighbor of FAU Short=NOF ;Protein NOF1;RM49;	(Human)	11	VQRGCGLRLL	SQTQGPPDYP	27	166					Subtiligase Based Positive Selection;unknown
P46783	EAGAGSATEFQFR	40S ribosomal protein S10	RPS10;40S ribosomal protein S10;RS10;	(Human)	6	AVPPGADKKA	EAGAGSATEF	141	165				MEP1B;GRAM	Subtiligase Based Positive Selection;unknown
P62266	IEENDEVLVAGFGR	40S ribosomal protein S23	RPS23;40S ribosomal protein S23;RS23;	(Human)	5	FVPNDGCLNF	IEENDEVLVA	94	143
P62857	EGDVLTLLESER	40S ribosomal protein S28	RPS28;40S ribosomal protein S28;RS28;	(Human)	19	IIRNVKGPVR	EGDVLTLLES	52	69
P10809	SLTPANEDQKIGIEIIKR	60 kDa heat shock protein, mitochondrial	HSPD1;60 kDa heat shock protein, mitochondrial;60 kDa chaperonin ;Chaperonin 60 Short=CPN60 ;Heat shock protein 60 Short=HSP-60 Short=Hsp60 ;HuCHA60 ;Mitochondrial matrix protein P1 ;P60 lymphocyte protein;CH60;	(Human)	2	ALLRCIPALD	SLTPANEDQK	453	573				MEP1A;MEP1B	Subtiligase Based Positive Selection	426
Q99798	HLIEAQVGGEKDLR	Aconitate hydratase, mitochondrial	ACO2;Aconitate hydratase, mitochondrial;Citrate hydro-lyase;ACON;	(Human)	22	VAVPSTIHCD	HLIEAQVGGE	128	780						100
Q99798	SSGQHVDVSPTSQR	Aconitate hydratase, mitochondrial	ACO2;Aconitate hydratase, mitochondrial;Citrate hydro-lyase;ACON;	(Human)	22	QDTYQHPPKD	SSGQHVDVSP	551	780						523
P63267	LYANNVLSGGTTMYPGIADR	Actin, gamma-enteric smooth muscle	ACTG2;Actin, gamma-enteric smooth muscle;Alpha-actin-3 ;Gamma-2-actin ;Smooth muscle gamma-actin;ACTH;	(Human)	2	MKCDIDIRKD	LYANNVLSGG	294	376
Q86TX2	AATLILEPAGR	Acyl-coenzyme A thioesterase 1	ACOT1;Acyl-coenzyme A thioesterase 1;CTE-I ;CTE-Ib ;Inducible cytosolic acyl-coenzyme A thioester hydrolase ;Long chain acyl-CoA thioester hydrolase Short=Long chain acyl-CoA hydrolase;ACOT1;	(Human)	14	M	AATLILEPAG	2	421	X	X			COFRADIC
P54920	MDNSGKEAEAMALLAEAER	Alpha-soluble NSF attachment protein	NAPA;Alpha-soluble NSF attachment protein;N-ethylmaleimide-sensitive factor attachment protein alpha;SNAA;	(Human)	19		MDNSGKEAEA	1	295	X	X			COFRADIC;N-TAILS
P21397	YVDVGGAYVGPTQNR	Amine oxidase [flavin-containing] A	MAOA;Amine oxidase [flavin-containing] A;Monoamine oxidase type A Short=MAO-A;AOFA;	(Human)	X	TYTIRNEHVD	YVDVGGAYVG	62	527
Q03154	TSKGPEEEHPSVTLFR	Aminoacylase-1	ACY1;Aminoacylase-1;N-acyl-L-amino-acid amidohydrolase;ACY1;M20.973	(Human)	3	M	TSKGPEEEHP	2	408	X	X
Q0VD83	GPGAEPEDWGILGR	Apolipoprotein B receptor	APOBR;Apolipoprotein B receptor;Apolipoprotein B-100 receptor ;Apolipoprotein B-48 receptor Short=Apolipoprotein B48 receptor Short=apoB-48R;APOBR;	(Human)	16	CESTRAWGTW	GPGAEPEDWG	267	1088
O94778	SGEIAMCEPEFGNDKAR	Aquaporin-8	AQP8;Aquaporin-8;AQP8;	(Human)	16	M	SGEIAMCEPE	2	261	X	X
O94778	CEPEFGNDKAR	Aquaporin-8	AQP8;Aquaporin-8;AQP8;	(Human)	16	MSGEIAM	CEPEFGNDKA	8	261			X
P53367	AQESPKNSAAEIPVTSNGEVDDSR	Arfaptin-1	ARFIP1;Arfaptin-1;ADP-ribosylation factor-interacting protein 1;ARFP1;	(Human)	4	M	AQESPKNSAA	2	373	X	X			COFRADIC
P25705	KTGTAEMSSILEER	ATP synthase subunit alpha, mitochondrial	ATP5A1;ATP synthase subunit alpha, mitochondrial;ATPA;	(Human)	18	NFHASNTHLQ	KTGTAEMSSI	45	553	X	X			Subtiligase Based Positive Selection;unknown	1
P25705	TGAIVDVPVGEELLGR	ATP synthase subunit alpha, mitochondrial	ATP5A1;ATP synthase subunit alpha, mitochondrial;ATPA;	(Human)	18	LIKEGDIVKR	TGAIVDVPVG	134	553						90
P25705	LDAATQQLLSR	ATP synthase subunit alpha, mitochondrial	ATP5A1;ATP synthase subunit alpha, mitochondrial;ATPA;	(Human)	18	VAAFAQFGSD	LDAATQQLLS	453	553						409
P25705	DLSKQAVAYR	ATP synthase subunit alpha, mitochondrial	ATP5A1;ATP synthase subunit alpha, mitochondrial;ATPA;	(Human)	18	NGKHALIIYD	DLSKQAVAYR	313	553						269
P06576	EGLPPILNALEVQGR	ATP synthase subunit beta, mitochondrial	ATP5B;ATP synthase subunit beta, mitochondrial;ATPB;	(Human)	12	IGAVVDVQFD	EGLPPILNAL	77	529						29
P08236	LQGGMLYPQESPSR	Beta-glucuronidase	GUSB;Beta-glucuronidase;Beta-G1;BGLR;	(Human)	7	GPLLWGCALG	LQGGMLYPQE	23	651	X	X			Subtiligase Based Positive Selection;N-TAILS
P12830	TPPVGVFIIER	Cadherin-1	CDH1;Cadherin-1;CAM 120/80 ;Epithelial cadherin Short=E-cadherin ;Uvomorulin ;CADH1;	(Human)	16	FYSITGQGAD	TPPVGVFIIE	199	882
P12830	TANWLEINPDTGAISTR	Cadherin-1	CDH1;Cadherin-1;CAM 120/80 ;Epithelial cadherin Short=E-cadherin ;Uvomorulin ;CADH1;	(Human)	16	QKITYRIWRD	TANWLEINPD	529	882
P12830	VLDVNEAPIFVPPEKR	Cadherin-1	CDH1;Cadherin-1;CAM 120/80 ;Epithelial cadherin Short=E-cadherin ;Uvomorulin ;CADH1;	(Human)	16	TTSTATVTVD	VLDVNEAPIF	477	882
Q12864	NVESAQASEVKPLR	Cadherin-17	CDH17;Cadherin-17;Intestinal peptide-associated transporter HPT-1 ;Liver-intestine cadherin Short=LI-cadherin;CAD17;	(Human)	8	IRIKKDKGKD	NVESAQASEV	818	832
Q12864	NPPTCPSPVTVFEVQENER	Cadherin-17	CDH17;Cadherin-17;Intestinal peptide-associated transporter HPT-1 ;Liver-intestine cadherin Short=LI-cadherin;CAD17;	(Human)	8	IHVKVKDIND	NPPTCPSPVT	336	832
Q12864	KGKDNVESAQASEVKPLR	Cadherin-17	CDH17;Cadherin-17;Intestinal peptide-associated transporter HPT-1 ;Liver-intestine cadherin Short=LI-cadherin;CAD17;	(Human)	8	AVVFIRIKKD	KGKDNVESAQ	814	832
Q12864	INDNPPTCPSPVTVFEVQENER	Cadherin-17	CDH17;Cadherin-17;Intestinal peptide-associated transporter HPT-1 ;Liver-intestine cadherin Short=LI-cadherin;CAD17;	(Human)	8	PLEIHVKVKD	INDNPPTCPS	333	832
Q12864	EENTANSFLNYR	Cadherin-17	CDH17;Cadherin-17;Intestinal peptide-associated transporter HPT-1 ;Liver-intestine cadherin Short=LI-cadherin;CAD17;	(Human)	8	IGTLTAHDRD	EENTANSFLN	369	832
A8K7I4	EPYTEQMGNCGEKGER	Calcium-activated chloride channel regulator 1	CLCA1;Calcium-activated chloride channel regulator 1;Calcium-activated chloride channel family member 1 Short=hCLCA1 ;Calcium-activated chloride channel protein 1 Short=CaCC-1 Short=hCaCC-1;CLCA1;M87.001	(Human)	1	VAESTPPGND	EPYTEQMGNC	116	914
A8K7I4	LKSEISNIAR	Calcium-activated chloride channel regulator 1	CLCA1;Calcium-activated chloride channel regulator 1;Calcium-activated chloride channel family member 1 Short=hCLCA1 ;Calcium-activated chloride channel protein 1 Short=CaCC-1 Short=hCaCC-1;CLCA1;M87.001	(Human)	1	IAIQAVDKVD	LKSEISNIAR	852	914
A8K7I4	DYDHGTAHKYIIR	Calcium-activated chloride channel regulator 1	CLCA1;Calcium-activated chloride channel regulator 1;Calcium-activated chloride channel family member 1 Short=hCLCA1 ;Calcium-activated chloride channel protein 1 Short=CaCC-1 Short=hCaCC-1;CLCA1;M87.001	(Human)	1	INLTWTAPGD	DYDHGTAHKY	779	914
A8K7I4	AFGALSSGNGAVSQR	Calcium-activated chloride channel regulator 1	CLCA1;Calcium-activated chloride channel regulator 1;Calcium-activated chloride channel family member 1 Short=hCLCA1 ;Calcium-activated chloride channel protein 1 Short=CaCC-1 Short=hCaCC-1;CLCA1;M87.001	(Human)	1	DQVQNNGLID	AFGALSSGNG	471	914
A8K7I4	EYNNDEKFYLSNGR	Calcium-activated chloride channel regulator 1	CLCA1;Calcium-activated chloride channel regulator 1;Calcium-activated chloride channel family member 1 Short=hCLCA1 ;Calcium-activated chloride channel protein 1 Short=CaCC-1 Short=hCaCC-1;CLCA1;M87.001	(Human)	1	WAHLRWGVFD	EYNNDEKFYL	168	914
A8K7I4	QVQNNGLIDAFGALSSGNGAVSQR	Calcium-activated chloride channel regulator 1	CLCA1;Calcium-activated chloride channel regulator 1;Calcium-activated chloride channel family member 1 Short=hCLCA1 ;Calcium-activated chloride channel protein 1 Short=CaCC-1 Short=hCaCC-1;CLCA1;M87.001	(Human)	1	TGGLQTYASD	QVQNNGLIDA	462	914
Q05682	TQVEGDDEAAFLER	Caldesmon	CALD1;Caldesmon;CALD1;	(Human)	7	DEEAKTTTTN	TQVEGDDEAA	86	793
Q05682	EAEGAPQVEAGKR	Caldesmon	CALD1;Caldesmon;CALD1;	(Human)	7	PGGRASVDTK	EAEGAPQVEA	523	793
Q05682	SAKPTKPAASDLPVPAEGVR	Caldesmon	CALD1;Caldesmon;CALD1;	(Human)	7	QYTSAIEGTK	SAKPTKPAAS	691	793
Q05682	GQISSEEPKQEEER	Caldesmon	CALD1;Caldesmon;CALD1;	(Human)	7	EETVVMSLKN	GQISSEEPKQ	231	793
P20810	QTPASTTQAGAPPR	Calpastatin	CAST;Calpastatin;Calpain inhibitor ;Sperm BS-17 component;ICAL;I27.001	(Human)	5	LAAAISEVVS	QTPASTTQAG	545	708
P00918	SQDKAVLKGGPLDGTYR	Carbonic anhydrase 2	CA2;Carbonic anhydrase 2;Carbonate dehydratase II ;Carbonic anhydrase C Short=CAC ;Carbonic anhydrase II Short=CA-II;CAH2;	(Human)	8	GHAFNVEFDD	SQDKAVLKGG	73	260
Q96DG6	CSPADKPYIDEAR	Carboxymethylenebutenolidase homolog	CMBL;Carboxymethylenebutenolidase homolog;CMBL;	(Human)	5	HGFVHRKRED	CSPADKPYID	222	245
P23786	LSAGSGPGQYLQR	Carnitine O-palmitoyltransferase 2, mitochondrial	CPT2;Carnitine O-palmitoyltransferase 2, mitochondrial;Carnitine palmitoyltransferase II Short=CPT II;CPT2;	(Human)	1	AVGPGAPSRP	LSAGSGPGQY	25	658	X	X			Subtiligase Based Positive Selection;unknown	-1
P23786	SAGSGPGQYLQR	Carnitine O-palmitoyltransferase 2, mitochondrial	CPT2;Carnitine O-palmitoyltransferase 2, mitochondrial;Carnitine palmitoyltransferase II Short=CPT II;CPT2;	(Human)	1	VGPGAPSRPL	SAGSGPGQYL	26	658	X	X			Subtiligase Based Positive Selection;unknown	0
O60716	DDSTLPLIDR	Catenin delta-1	CTNND1;Catenin delta-1;Cadherin-associated Src substrate Short=CAS ;p120 catenin Short=p120(ctn) ;p120(cas);CTND1;	(Human)	11	ASRSQSSHSY	DDSTLPLIDR	866	968
O60716	DSTLPLIDR	Catenin delta-1	CTNND1;Catenin delta-1;Cadherin-associated Src substrate Short=CAS ;p120 catenin Short=p120(ctn) ;p120(cas);CTND1;	(Human)	11	SRSQSSHSYD	DSTLPLIDRN	867	968
O60716	GLPVDASSVSNNYIQTLGR	Catenin delta-1	CTNND1;Catenin delta-1;Cadherin-associated Src substrate Short=CAS ;p120 catenin Short=p120(ctn) ;p120(cas);CTND1;	(Human)	11	TVQPVAMGPD	GLPVDASSVS	162	968				GRAB
P07339	GILGMAYPR	Cathepsin D	CTSD;Cathepsin D;Cathepsin D light chain Contains: ;Cathepsin D heavy chain Flags: Precursor;CATD;A01.009	(Human)	11	GITFIAAKFD	GILGMAYPRI	197	412
P07339	TSLMVGPVDEVR	Cathepsin D	CTSD;Cathepsin D;Cathepsin D light chain Contains: ;Cathepsin D heavy chain Flags: Precursor;CATD;A01.009	(Human)	11	EGCEAIVDTG	TSLMVGPVDE	298	412					Subtiligase Based Positive Selection
P07339	TGTSLMVGPVDEVR	Cathepsin D	CTSD;Cathepsin D;Cathepsin D light chain Contains: ;Cathepsin D heavy chain Flags: Precursor;CATD;A01.009	(Human)	11	CKEGCEAIVD	TGTSLMVGPV	296	412
Q9UBR2	GTEYWIVR	Cathepsin Z	CTSZ;Cathepsin Z;Cathepsin P ;Cathepsin X;CATZ;C01.013	(Human)	20	VSVAGWGISD	GTEYWIVRNS	253	303
Q9UBR2	DLPKSWDWR	Cathepsin Z	CTSZ;Cathepsin Z;Cathepsin P ;Cathepsin X;CATZ;C01.013	(Human)	20	PRPHEYLSPA	DLPKSWDWRN	61	303	X	X
Q9UBR2	GVNYASITR	Cathepsin Z	CTSZ;Cathepsin Z;Cathepsin P ;Cathepsin X;CATZ;C01.013	(Human)	20	PKSWDWRNVD	GVNYASITRN	73	303					Subtiligase Based Positive Selection
Q99795	ISVETPQDVLR	Cell surface A33 antigen	GPA33;Cell surface A33 antigen;Glycoprotein A33;GPA33;	(Human)	1	LCAVRVTVDA	ISVETPQDVL	22	319	X	X
P10645	SEGLSQGLVDR	Chromogranin-A	CHGA;Chromogranin-A;Pituitary secretory protein I Short=SP-I;CMGA;	(Human)	14	KYPGPQAEGD	SEGLSQGLVD	203	457
P10645	SLEAGLPLQVR	Chromogranin-A	CHGA;Chromogranin-A;Pituitary secretory protein I Short=SP-I;CMGA;	(Human)	14	RGWRPSSRED	SLEAGLPLQV	402	457
P10645	EDSLEAGLPLQVR	Chromogranin-A	CHGA;Chromogranin-A;Pituitary secretory protein I Short=SP-I;CMGA;	(Human)	14	LRRGWRPSSR	EDSLEAGLPL	400	457
P10645	TLSKPSPMPVSQECFETLR	Chromogranin-A	CHGA;Chromogranin-A;Pituitary secretory protein I Short=SP-I;CMGA;	(Human)	14	MKCIVEVISD	TLSKPSPMPV	43	457
P00488	DAVYLDNEKER	Coagulation factor XIII A chain	F13A1;Coagulation factor XIII A chain;Protein-glutamine gamma-glutamyltransferase A chain ;Transglutaminase A chain;F13A;	(Human)	6	YILFNPWCED	DAVYLDNEKE	192	732
P00488	DLPTVELQGVVPR	Coagulation factor XIII A chain	F13A1;Coagulation factor XIII A chain;Protein-glutamine gamma-glutamyltransferase A chain ;Transglutaminase A chain;F13A;	(Human)	6	PPNNSNAAED	DLPTVELQGV	26	732
P00488	AVYLDNEKER	Coagulation factor XIII A chain	F13A1;Coagulation factor XIII A chain;Protein-glutamine gamma-glutamyltransferase A chain ;Transglutaminase A chain;F13A;	(Human)	6	ILFNPWCEDD	AVYLDNEKER	193	732
P12277	DLDPNYVLSSR	Creatine kinase B-type	CKB;Creatine kinase B-type;B-CK ;Creatine kinase B chain;KCRB;	(Human)	14	LNPDNLQGGD	DLDPNYVLSS	120	381
P12277	TAAVGGVFDVSNADR	Creatine kinase B-type	CKB;Creatine kinase B-type;B-CK ;Creatine kinase B chain;KCRB;	(Human)	14	LQKRGTGGVD	TAAVGGVFDV	327	381
P12277	NLQGGDDLDPNYVLSSR	Creatine kinase B-type	CKB;Creatine kinase B-type;B-CK ;Creatine kinase B chain;KCRB;	(Human)	14	DEHKTDLNPD	NLQGGDDLDP	114	381
P12277	LNPDNLQGGDDLDPNYVLSSR	Creatine kinase B-type	CKB;Creatine kinase B-type;B-CK ;Creatine kinase B chain;KCRB;	(Human)	14	YKPSDEHKTD	LNPDNLQGGD	110	381
P12532	GVNYLIDCER	Creatine kinase U-type, mitochondrial	CKMT1B;Creatine kinase U-type, mitochondrial;Acidic-type mitochondrial creatine kinase Short=Mia-CK ;Ubiquitous mitochondrial creatine kinase Short=U-MtCK;KCRU;	(Human)	15	EVELVQLVID	GVNYLIDCER	389	417						349
P12532	ALSGLKGDLAGR	Creatine kinase U-type, mitochondrial	CKMT1B;Creatine kinase U-type, mitochondrial;Acidic-type mitochondrial creatine kinase Short=Mia-CK ;Ubiquitous mitochondrial creatine kinase Short=U-MtCK;KCRU;	(Human)	15	RREVERVVVD	ALSGLKGDLA	194	417						154
P12532	TAATGGVFDISNLDR	Creatine kinase U-type, mitochondrial	CKMT1B;Creatine kinase U-type, mitochondrial;Acidic-type mitochondrial creatine kinase Short=Mia-CK ;Ubiquitous mitochondrial creatine kinase Short=U-MtCK;KCRU;	(Human)	15	LQKRGTGGVD	TAATGGVFDI	360	417						320
P04080	CGAPSATQPATAETQHIADQVR	Cystatin-B	CSTB;Cystatin-B;CPI-B ;Liver thiol proteinase inhibitor ;Stefin-B;CYTB;I25.003	(Human)	21	MM	CGAPSATQPA	3	98		X		MEP1A	COFRADIC;other;N-TAILS;Subtiligase Based Positive Selection;unknown
P10606	SGGGVPTDEEQATGLER	Cytochrome c oxidase subunit 5B, mitochondrial	COX5B;Cytochrome c oxidase subunit 5B, mitochondrial;Cytochrome c oxidase polypeptide Vb;COX5B;	(Human)	2	SGAAAMRSMA	SGGGVPTDEE	33	129	X	X			Subtiligase Based Positive Selection;unknown	1
P10606	ASGGGVPTDEEQATGLER	Cytochrome c oxidase subunit 5B, mitochondrial	COX5B;Cytochrome c oxidase subunit 5B, mitochondrial;Cytochrome c oxidase polypeptide Vb;COX5B;	(Human)	2	PSGAAAMRSM	ASGGGVPTDE	32	129	X	X			Subtiligase Based Positive Selection;unknown	0
Q02338	GVKELDSLNSDR	D-beta-hydroxybutyrate dehydrogenase, mitochondrial	BDH1;D-beta-hydroxybutyrate dehydrogenase, mitochondrial;3-hydroxybutyrate dehydrogenase;BDH;	(Human)	3	GCLMKDKGHD	GVKELDSLNS	95	343						48
P07585	FEPSLGPVCPFR	Decorin	DCN;Decorin;Bone proteoglycan II ;PG-S2 ;PG40;PGS2;	(Human)	12	IGPEVPDDRD	FEPSLGPVCP	46	359
Q13011	GSSAQEEASGVALGEAPDHSYESLR	Delta(3,5)-Delta(2,4)-dienoyl-CoA isomerase, mitochondrial	ECH1;Delta(3,5)-Delta(2,4)-dienoyl-CoA isomerase, mitochondrial;ECH1;	(Human)	19	PGLSISLRLT	GSSAQEEASG	35	328	X	X			Subtiligase Based Positive Selection	1
Q14126	AIMTTETTKTAR	Desmoglein-2	DSG2;Desmoglein-2;Cadherin family member 5 ;HDGC;DSG2;	(Human)	18	RATQFTGATG	AIMTTETTKT	738	1118					Subtiligase Based Positive Selection
P15924	SVFLPKDVALARGLIDR	Desmoplakin	DSP;Desmoplakin;250/210 kDa paraneoplastic pemphigus antigen;DESP;	(Human)	6	ASGGVVDPVN	SVFLPKDVAL	2140	2871
Q8IWV7	MNKIMSYSSDFR	E3 ubiquitin-protein ligase UBR1	UBR1;E3 ubiquitin-protein ligase UBR1;N-recognin-1 ;Ubiquitin-protein ligase E3-alpha-1 ;Ubiquitin-protein ligase E3-alpha-I;UBR1;	(Human)	15	QKFALRLGSW	MNKIMSYSSD	321	1749
Q9HC35	GTDINALVR	Echinoderm microtubule-associated protein-like 4	EML4;Echinoderm microtubule-associated protein-like 4;Restrictedly overexpressed proliferation-associated protein ;Ropp 120;EMAL4;	(Human)	2	VFGVWPEGSD	GTDINALVRS	789	981
Q9H223	AGGADAVQTVTGGLR	EH domain-containing protein 4	EHD4;EH domain-containing protein 4;Hepatocellular carcinoma-associated protein 10/11 ;PAST homolog 4;EHD4;	(Human)	15	MGRQAGGRER	AGGADAVQTV	15	541
Q05639	KIGGIGTVPVGR	Elongation factor 1-alpha 2	EEF1A2;Elongation factor 1-alpha 2;Eukaryotic elongation factor 1 A-2 Short=eEF1A-2 ;Statin-S1;EF1A2;	(Human)	20	PLRLPLQDVY	KIGGIGTVPV	255	463				GRAB;HTRA2
P30084	SGANFEYIIAEKR	Enoyl-CoA hydratase, mitochondrial	ECHS1;Enoyl-CoA hydratase, mitochondrial;Enoyl-CoA hydratase 1 ;Short-chain enoyl-CoA hydratase Short=SCEH;ECHM;	(Human)	10	VRCPAWRPFA	SGANFEYIIA	29	290	X	X			Subtiligase Based Positive Selection;unknown	1
P30084	ASGANFEYIIAEKR	Enoyl-CoA hydratase, mitochondrial	ECHS1;Enoyl-CoA hydratase, mitochondrial;Enoyl-CoA hydratase 1 ;Short-chain enoyl-CoA hydratase Short=SCEH;ECHM;	(Human)	10	PVRCPAWRPF	ASGANFEYII	28	290	X	X			Subtiligase Based Positive Selection;unknown	0
Q9NVF9	GVNEVDYCLYPAR	Ethanolamine kinase 2	ETNK2;Ethanolamine kinase 2;Ethanolamine kinase-like protein;EKI2;	(Human)	1	DIGNHFNEFA	GVNEVDYCLY	290	386
Q01469	GALVQHQEWDGKESTITR	Fatty acid-binding protein, epidermal	FABP5;Fatty acid-binding protein, epidermal;Epidermal-type fatty acid-binding protein Short=E-FABP ;Fatty acid-binding protein 5 ;Psoriasis-associated fatty acid-binding protein homolog Short=PA-FABP;FABP5;	(Human)	8	KTQTVCNFTD	GALVQHQEWD	92	135
P12104	AFDSTWKVDR	Fatty acid-binding protein, intestinal	FABP2;Fatty acid-binding protein, intestinal;Fatty acid-binding protein 2 ;Intestinal-type fatty acid-binding protein Short=I-FABP;FABPI;	(Human)	4	M	AFDSTWKVDR	2	132	X	X
O94887	AQTPVGVSTLEPGQTLLPR	FERM, RhoGEF and pleckstrin domain-containing protein 2	FARP2;FERM, RhoGEF and pleckstrin domain-containing protein 2;FERM domain including RhoGEF Short=FIR ;Pleckstrin homology domain-containing family C member 3 Short=PH domain-containing family C member 3;FARP2;	(Human)	2	VLQTAGMRLG	AQTPVGVSTL	20	1054
Q9UGM5	PPTDSPSKAGPR	Fetuin-B	FETUB;Fetuin-B;16G2 ;Fetuin-like protein IRL685 ;Gugu;FETUB;I25.061	(Human)	3	KVEESQQKNT	PPTDSPSKAG	290	382
P02675	SCNIPVVSGKECEEIIR	Fibrinogen beta chain	FGB;Fibrinogen beta chain;Fibrinopeptide B Contains: ;Fibrinogen beta chain Flags: Precursor;FIBB;	(Human)	4	MEYCRTPCTV	SCNIPVVSGK	230	491
P21333	TYAQGGQQTWAPER	Filamin-A	FLNA;Filamin-A;Actin-binding protein 280 Short=ABP-280 ;Alpha-filamin ;Endothelial actin-binding protein ;Filamin-1 ;Non-muscle filamin;FLNA;	(Human)	X	LRSQQLAPQY	TYAQGGQQTW	1762	2647				CAN2
P21333	GQHVASSPIPVVISQSEIGDASR	Filamin-A	FLNA;Filamin-A;Actin-binding protein 280 Short=ABP-280 ;Alpha-filamin ;Endothelial actin-binding protein ;Filamin-1 ;Non-muscle filamin;FLNA;	(Human)	X	GEHLVHVKKN	GQHVASSPIP	2027	2647					Subtiligase Based Positive Selection
O75369	AGEGLLAVQITDQEGKPKR	Filamin-B	FLNB;Filamin-B;ABP-278 ;ABP-280 homolog ;Actin-binding-like protein ;Beta-filamin ;Filamin homolog 1 Short=Fh1 ;Filamin-3 ;Thyroid autoantigen ;Truncated actin-binding protein Short=Truncated ABP;FLNB;	(Human)	3	PVDFAIDARD	AGEGLLAVQI	1547	2602
O75369	EHIPESPYLVPVIAPSDDAR	Filamin-B	FLNB;Filamin-B;ABP-278 ;ABP-280 homolog ;Actin-binding-like protein ;Beta-filamin ;Filamin homolog 1 Short=Fh1 ;Filamin-3 ;Thyroid autoantigen ;Truncated actin-binding protein Short=Truncated ABP;FLNB;	(Human)	3	NYEVSIKFND	EHIPESPYLV	2269	2602				MEP1B
O75369	SSKAGLAPLEVR	Filamin-B	FLNB;Filamin-B;ABP-278 ;ABP-280 homolog ;Actin-binding-like protein ;Beta-filamin ;Filamin homolog 1 Short=Fh1 ;Filamin-3 ;Thyroid autoantigen ;Truncated actin-binding protein Short=Truncated ABP;FLNB;	(Human)	3	ARVLQSFTVD	SSKAGLAPLE	1447	2602
O75369	CTEAGEGDVSVGIKCDAR	Filamin-B	FLNB;Filamin-B;ABP-278 ;ABP-280 homolog ;Actin-binding-like protein ;Beta-filamin ;Filamin homolog 1 Short=Fh1 ;Filamin-3 ;Thyroid autoantigen ;Truncated actin-binding protein Short=Truncated ABP;FLNB;	(Human)	3	ANEPTHFTVD	CTEAGEGDVS	769	2602
O75369	GTYAVTYIPDKTGR	Filamin-B	FLNB;Filamin-B;ABP-278 ;ABP-280 homolog ;Actin-binding-like protein ;Beta-filamin ;Filamin homolog 1 Short=Fh1 ;Filamin-3 ;Thyroid autoantigen ;Truncated actin-binding protein Short=Truncated ABP;FLNB;	(Human)	3	KRAIVHDNKD	GTYAVTYIPD	1574	2602
Q14315	SPFVVPVASLSDDAR	Filamin-C	FLNC;Filamin-C;ABP-280-like protein ;ABP-L ;Actin-binding-like protein ;Filamin-2 ;Gamma-filamin;FLNC;	(Human)	7	IKFNDEHIPD	SPFVVPVASL	2395	2725
P09467	ADQAPFDTDVNTLTR	Fructose-1,6-bisphosphatase 1	FBP1;Fructose-1,6-bisphosphatase 1;D-fructose-1,6-bisphosphate 1-phosphohydrolase 1 ;Liver FBPase;F16P1;	(Human)	9	M	ADQAPFDTDV	2	338	X	X			COFRADIC
P56470	TLQGGKWGSEER	Galectin-4	LGALS4;Galectin-4;Antigen NY-CO-27 ;L-36 lactose-binding protein Short=L36LBP ;Lactose-binding lectin 4;LEG4;	(Human)	19	FDGWDKVVFN	TLQGGKWGSE	78	323
Q9UEY8	SSDASQGVITTPPPPSMPHKER	Gamma-adducin	ADD3;Gamma-adducin;Adducin-like protein 70;ADDG;	(Human)	10	M	SSDASQGVIT	2	706	X	X			N-TAILS
P48637	ATNWGSLLQDKQQLEELAR	Glutathione synthetase	GSS;Glutathione synthetase;Glutathione synthase;GSHB;	(Human)	20	M	ATNWGSLLQD	2	474	X	X			COFRADIC;other;N-TAILS
P41250	MDGAGAEEVLAPLR	Glycine--tRNA ligase	GARS;Glycine--tRNA ligase;Diadenosine tetraphosphate synthetase Short=AP-4-A synthetase ;Glycyl-tRNA synthetase Short=GlyRS;SYG;	(Human)	7	SLPAAASRSS	MDGAGAEEVL	55	739					other;unknown;Subtiligase Based Positive Selection
P11216	AKPLTDSEKR	Glycogen phosphorylase, brain form	PYGB;Glycogen phosphorylase, brain form;PYGB;	(Human)	20	M	AKPLTDSEKR	2	843	X	X			COFRADIC
Q9HCN4	ESMAQYWKRNNK	GPN-loop GTPase 1	GPN1;GPN-loop GTPase 1;MBD2-interacting protein Short=MBDin ;XPA-binding protein 1;GPN1;	(Human)	2	EEPAFQNFMQ	ESMAQYWKRN	363	374
Q9UIJ7	DLTGEPLIQR	GTP:AMP phosphotransferase AK3, mitochondrial	AK3;GTP:AMP phosphotransferase AK3, mitochondrial;Adenylate kinase 3 Short=AK 3 ;Adenylate kinase 3 alpha-like 1;KAD3;	(Human)	9	FNPPKTVGID	DLTGEPLIQR	152	227
Q9UBI6	SSKTASTNNIAQAR	Guanine nucleotide-binding protein G(I)/G(S)/G(O) subunit gamma-12	GNG12;Guanine nucleotide-binding protein G(I)/G(S)/G(O) subunit gamma-12;GBG12;	(Human)	1	M	SSKTASTNNI	2	72	X	X			COFRADIC
P17066	VEILANDQGNR	Heat shock 70 kDa protein 6	HSPA6;Heat shock 70 kDa protein 6;Heat shock 70 kDa protein B';HSP76;	(Human)	1	SCVGVFQQGR	VEILANDQGN	28	643
P08238	GVVDSEDLPLNISR	Heat shock protein HSP 90-beta	HSP90AB1;Heat shock protein HSP 90-beta;Heat shock 84 kDa Short=HSP 84 Short=HSP84;HS90B;	(Human)	6	LIPEYLNFIR	GVVDSEDLPL	379	724					Subtiligase Based Positive Selection
P69905	GKVGAHAGEYGAEALER	Hemoglobin subunit alpha	HBA2;Hemoglobin subunit alpha;Alpha-globin ;Hemoglobin alpha chain;HBA;	(Human)	16	ADKTNVKAAW	GKVGAHAGEY	16	142					N-TAILS
P69905	AGEYGAEALER	Hemoglobin subunit alpha	HBA2;Hemoglobin subunit alpha;Alpha-globin ;Hemoglobin alpha chain;HBA;	(Human)	16	KAAWGKVGAH	AGEYGAEALE	22	142					N-TAILS;Subtiligase Based Positive Selection
O43390	EDYYYHPPPR	Heterogeneous nuclear ribonucleoprotein R	HNRNPR;Heterogeneous nuclear ribonucleoprotein R;HNRPR;	(Human)	1	ARQASRSTAY	EDYYYHPPPR	432	633
Q9Y241	TGVSLPSYEEDQGSKLIR	HIG1 domain family member 1A, mitochondrial	HIGD1A;HIG1 domain family member 1A, mitochondrial;Hypoxia-inducible gene 1 protein ;RCF1 homolog A Short=RCF1a;HIG1A;	(Human)	3	MSTD	TGVSLPSYEE	5	93		X			COFRADIC;other
Q9Y241	STDTGVSLPSYEEDQGSKLIR	HIG1 domain family member 1A, mitochondrial	HIGD1A;HIG1 domain family member 1A, mitochondrial;Hypoxia-inducible gene 1 protein ;RCF1 homolog A Short=RCF1a;HIG1A;	(Human)	3	M	STDTGVSLPS	2	93	X	X			COFRADIC;other
P07305	KSTDHPKYSDMIVAAIQAEKNR	Histone H1.0	H1F0;Histone H1.0;Histone H1' ;Histone H1(0);H10;	(Human)	22	AKPKRAKASK	KSTDHPKYSD	21	194
P07305	STDHPKYSDMIVAAIQAEKNR	Histone H1.0	H1F0;Histone H1.0;Histone H1' ;Histone H1(0);H10;	(Human)	22	KPKRAKASKK	STDHPKYSDM	22	194
P16403	LAAAGYDVEKNNSR	Histone H1.2	HIST1H1C;Histone H1.2;Histone H1c ;Histone H1d ;Histone H1s-1;H12;	(Human)	6	GVSLAALKKA	LAAAGYDVEK	66	213				GRAM;GRAA;CATS;CATL1	Subtiligase Based Positive Selection
P16401	ALAAGGYDVEKNNSR	Histone H1.5	HIST1H1B;Histone H1.5;Histone H1a ;Histone H1b ;Histone H1s-3;H15;	(Human)	6	NGLSLAALKK	ALAAGGYDVE	68	226				GRAM;GRAA	Subtiligase Based Positive Selection
Q71DI3	KSAPATGGVKKPHR	Histone H3.2	HIST2H3D;Histone H3.2;Histone H3/m ;Histone H3/o;H32;	(Human)	1	RKQLATKAAR	KSAPATGGVK	28	136				GRAA
P62805	ISGLIYEETR	Histone H4	HIST4H4;Histone H4;H4;	(Human)	1,12,6	RLARRGGVKR	ISGLIYEETR	47	103
P35914	VSTSSMGTLPKR	Hydroxymethylglutaryl-CoA lyase, mitochondrial	HMGCL;Hydroxymethylglutaryl-CoA lyase, mitochondrial;3-hydroxy-3-methylglutarate-CoA lyase;HMGCL;	(Human)	1	RLVGLASLRA	VSTSSMGTLP	21	325					Subtiligase Based Positive Selection;unknown	-7
P54868	KLVSSTSDLPKR	Hydroxymethylglutaryl-CoA synthase, mitochondrial	HMGCS2;Hydroxymethylglutaryl-CoA synthase, mitochondrial;3-hydroxy-3-methylglutaryl coenzyme A synthase;HMCS2;	(Human)	1	QDAAPGSPLD	KLVSSTSDLP	437	508					Subtiligase Based Positive Selection	399
P54868	AAPGSPLDKLVSSTSDLPKR	Hydroxymethylglutaryl-CoA synthase, mitochondrial	HMGCS2;Hydroxymethylglutaryl-CoA synthase, mitochondrial;3-hydroxy-3-methylglutaryl coenzyme A synthase;HMCS2;	(Human)	1	SFFSFRVSQD	AAPGSPLDKL	429	508						391
P54868	TNSLFPGTWYLER	Hydroxymethylglutaryl-CoA synthase, mitochondrial	HMGCS2;Hydroxymethylglutaryl-CoA synthase, mitochondrial;3-hydroxy-3-methylglutaryl coenzyme A synthase;HMCS2;	(Human)	1	HKVNFSPPGD	TNSLFPGTWY	482	508						444
Q9Y6R7	ASVDLKNTGR	IgGFc-binding protein	FCGBP;IgGFc-binding protein;Fcgamma-binding protein antigen Short=FcgammaBP;FCGBP;	(Human)		ATLLWGLTQE	ASVDLKNTGR	24	5405	X	X
Q9Y6R7	GEAVALPVAVGR	IgGFc-binding protein	FCGBP;IgGFc-binding protein;Fcgamma-binding protein antigen Short=FcgammaBP;FCGBP;	(Human)		LAQGQQVTVD	GEAVALPVAV	4931	5405
Q9Y6R7	TAELTLLR	IgGFc-binding protein	FCGBP;IgGFc-binding protein;Fcgamma-binding protein antigen Short=FcgammaBP;FCGBP;	(Human)		SVQALNAKPD	TAELTLLRPI	127	5405
Q9Y6R7	TLPAFSVEAKNEHR	IgGFc-binding protein	FCGBP;IgGFc-binding protein;Fcgamma-binding protein antigen Short=FcgammaBP;FCGBP;	(Human)		TMVELCSEDD	TLPAFSVEAK	507	5405
Q9Y6R7	DTLPAFSVEAKNEHR	IgGFc-binding protein	FCGBP;IgGFc-binding protein;Fcgamma-binding protein antigen Short=FcgammaBP;FCGBP;	(Human)		YTMVELCSED	DTLPAFSVEA	506	5405
Q8WWA0	TDEANTYFKEWTCSSSPSLPR	Intelectin-1	ITLN1;Intelectin-1;Endothelial lectin HL-1 ;Galactofuranose-binding lectin ;Intestinal lactoferrin receptor ;Omentin;ITLN1;	(Human)	1	FLIATTRGWS	TDEANTYFKE	19	313	X	X
Q8WWA0	EANTYFKEWTCSSSPSLPR	Intelectin-1	ITLN1;Intelectin-1;Endothelial lectin HL-1 ;Galactofuranose-binding lectin ;Intestinal lactoferrin receptor ;Omentin;ITLN1;	(Human)	1	IATTRGWSTD	EANTYFKEWT	21	313	X	X
Q86U28	ASSSSPEAGEGQIR	Iron-sulfur cluster assembly 2 homolog, mitochondrial	ISCA2;Iron-sulfur cluster assembly 2 homolog, mitochondrial;HESB-like domain-containing protein 1;ISCA2;	(Human)	14	ASLGPQARRE	ASSSSPEAGE	38	154					unknown;Subtiligase Based Positive Selection	29
O75874	SKKISGGSVVEMQGDEMTR	Isocitrate dehydrogenase [NADP] cytoplasmic	IDH1;Isocitrate dehydrogenase [NADP] cytoplasmic;Cytosolic NADP-isocitrate dehydrogenase ;IDP ;NADP(+)-specific ICDH ;Oxalosuccinate decarboxylase;IDHC;	(Human)	2	M	SKKISGGSVV	2	414	X	X			COFRADIC;N-TAILS
O75874	SKKISGGSVVEMQGDEMTR	Isocitrate dehydrogenase [NADP] cytoplasmic	IDH1;Isocitrate dehydrogenase [NADP] cytoplasmic;Cytosolic NADP-isocitrate dehydrogenase ;IDP ;NADP(+)-specific ICDH ;Oxalosuccinate decarboxylase;IDHC;	(Human)	2	M	SKKISGGSVV	2	414	X	X			COFRADIC;N-TAILS
P26440	DAINGLSEEQR	Isovaleryl-CoA dehydrogenase, mitochondrial	IVD;Isovaleryl-CoA dehydrogenase, mitochondrial;IVD;	(Human)	15	QRAHSLLPVD	DAINGLSEEQ	37	423						7
P26440	HSLLPVDDAINGLSEEQR	Isovaleryl-CoA dehydrogenase, mitochondrial	IVD;Isovaleryl-CoA dehydrogenase, mitochondrial;IVD;	(Human)	15	PLAGFVSQRA	HSLLPVDDAI	30	423	X	X			Subtiligase Based Positive Selection	0
P05783	SMQTIQKTTTR	Keratin, type I cytoskeletal 18	KRT18;Keratin, type I cytoskeletal 18;Cell proliferation-inducing gene 46 protein ;Cytokeratin-18 Short=CK-18 ;Keratin-18 Short=K18;K1C18;	(Human)	12	NLGDALDSSN	SMQTIQKTTT	401	430				CASP3;CASP7
P05783	SSNSMQTIQKTTTR	Keratin, type I cytoskeletal 18	KRT18;Keratin, type I cytoskeletal 18;Cell proliferation-inducing gene 46 protein ;Cytokeratin-18 Short=CK-18 ;Keratin-18 Short=K18;K1C18;	(Human)	12	EDFNLGDALD	SSNSMQTIQK	398	430				GRAB;CASP3;CASP7
P05783	ALDSSNSMQTIQKTTTR	Keratin, type I cytoskeletal 18	KRT18;Keratin, type I cytoskeletal 18;Cell proliferation-inducing gene 46 protein ;Cytokeratin-18 Short=CK-18 ;Keratin-18 Short=K18;K1C18;	(Human)	12	EDGEDFNLGD	ALDSSNSMQT	395	430				MEP1B;GRAB;CASP3;CASP7
P05783	GEDFNLGDALDSSNSMQTIQKTTTR	Keratin, type I cytoskeletal 18	KRT18;Keratin, type I cytoskeletal 18;Cell proliferation-inducing gene 46 protein ;Cytokeratin-18 Short=CK-18 ;Keratin-18 Short=K18;K1C18;	(Human)	12	IATYRRLLED	GEDFNLGDAL	387	430
P05783	GKVVSETNDTKVLR	Keratin, type I cytoskeletal 18	KRT18;Keratin, type I cytoskeletal 18;Cell proliferation-inducing gene 46 protein ;Cytokeratin-18 Short=CK-18 ;Keratin-18 Short=K18;K1C18;	(Human)	12	QKTTTRRIVD	GKVVSETNDT	416	430
P05783	FNLGDALDSSNSMQTIQKTTTR	Keratin, type I cytoskeletal 18	KRT18;Keratin, type I cytoskeletal 18;Cell proliferation-inducing gene 46 protein ;Cytokeratin-18 Short=CK-18 ;Keratin-18 Short=K18;K1C18;	(Human)	12	YRRLLEDGED	FNLGDALDSS	390	430
P05783	GSVQAPSYGAR	Keratin, type I cytoskeletal 18	KRT18;Keratin, type I cytoskeletal 18;Cell proliferation-inducing gene 46 protein ;Cytokeratin-18 Short=CK-18 ;Keratin-18 Short=K18;K1C18;	(Human)	12	STFSTNYRSL	GSVQAPSYGA	17	430
P05783	GEDFNLGDALDSSNSMQTIQKTTTR	Keratin, type I cytoskeletal 18	KRT18;Keratin, type I cytoskeletal 18;Cell proliferation-inducing gene 46 protein ;Cytokeratin-18 Short=CK-18 ;Keratin-18 Short=K18;K1C18;	(Human)	12	IATYRRLLED	GEDFNLGDAL	387	430
P05784	VRPASSAASVYAGAGGSGSR	Keratin, type I cytoskeletal 18	Krt18;Keratin, type I cytoskeletal 18;Cytokeratin endo B Short=Keratin D ;Cytokeratin-18 Short=CK-18 ;Keratin-18 Short=K18;K1C18;	(Mouse)	15	LGSVRTPSQR	VRPASSAASV	27	423
P08727	GLLAGNEKLTMQNLNDR	Keratin, type I cytoskeletal 19	KRT19;Keratin, type I cytoskeletal 19;Cytokeratin-19 Short=CK-19 ;Keratin-19 Short=K19;K1C19;	(Human)	17	GYGGVLTASD	GLLAGNEKLT	74	400				MEP1B
P08727	LAKILSDMR	Keratin, type I cytoskeletal 19	KRT19;Keratin, type I cytoskeletal 19;Cytokeratin-19 Short=CK-19 ;Keratin-19 Short=K19;K1C19;	(Human)	17	VEVDSAPGTD	LAKILSDMRS	245	400
P08727	WYQKQGPGPSR	Keratin, type I cytoskeletal 19	KRT19;Keratin, type I cytoskeletal 19;Cytokeratin-19 Short=CK-19 ;Keratin-19 Short=K19;K1C19;	(Human)	17	NGELEVKIRD	WYQKQGPGPS	115	400				MEP1A;MEP1B
P35900	LGTTPSVYGGAGGR	Keratin, type I cytoskeletal 20	KRT20;Keratin, type I cytoskeletal 20;Cytokeratin-20 Short=CK-20 ;Keratin-20 Short=K20 ;Protein IT;K1C20;	(Human)	17	PVVSTVGMQR	LGTTPSVYGG	29	424
P35900	NAKLAAEDFR	Keratin, type I cytoskeletal 20	KRT20;Keratin, type I cytoskeletal 20;Cytokeratin-20 Short=CK-20 ;Keratin-20 Short=K20 ;Protein IT;K1C20;	(Human)	17	QNARCVLQID	NAKLAAEDFR	147	424
P35900	SLSSSLQAPVVSTVGMQR	Keratin, type I cytoskeletal 20	KRT20;Keratin, type I cytoskeletal 20;Cytokeratin-20 Short=CK-20 ;Keratin-20 Short=K20 ;Protein IT;K1C20;	(Human)	17	MDFSRRSFHR	SLSSSLQAPV	11	424
P35900	TTPSVYGGAGGR	Keratin, type I cytoskeletal 20	KRT20;Keratin, type I cytoskeletal 20;Cytokeratin-20 Short=CK-20 ;Keratin-20 Short=K20 ;Protein IT;K1C20;	(Human)	17	VSTVGMQRLG	TTPSVYGGAG	31	424
P35900	AAPGLNLGVIMNEMR	Keratin, type I cytoskeletal 20	KRT20;Keratin, type I cytoskeletal 20;Cytokeratin-20 Short=CK-20 ;Keratin-20 Short=K20 ;Protein IT;K1C20;	(Human)	17	LGNTVNVEVD	AAPGLNLGVI	229	424
P35900	VKTTEYQLSTLEER	Keratin, type I cytoskeletal 20	KRT20;Keratin, type I cytoskeletal 20;Cytokeratin-20 Short=CK-20 ;Keratin-20 Short=K20 ;Protein IT;K1C20;	(Human)	17	TYRRLLEGED	VKTTEYQLST	379	424
P35900	TEVQLTELR	Keratin, type I cytoskeletal 20	KRT20;Keratin, type I cytoskeletal 20;Cytokeratin-20 Short=CK-20 ;Keratin-20 Short=K20 ;Protein IT;K1C20;	(Human)	17	VTVNTEELKG	TEVQLTELRR	282	424
P35900	RLASYLEKVR	Keratin, type I cytoskeletal 20	KRT20;Keratin, type I cytoskeletal 20;Cytokeratin-20 Short=CK-20 ;Keratin-20 Short=K20 ;Protein IT;K1C20;	(Human)	17	EKMAMQNLND	RLASYLEKVR	80	424
P35900	AAPGLNLGVIMNEMR	Keratin, type I cytoskeletal 20	KRT20;Keratin, type I cytoskeletal 20;Cytokeratin-20 Short=CK-20 ;Keratin-20 Short=K20 ;Protein IT;K1C20;	(Human)	17	LGNTVNVEVD	AAPGLNLGVI	229	424
P35900	GKVVSSEVKEVEENI	Keratin, type I cytoskeletal 20	KRT20;Keratin, type I cytoskeletal 20;Cytokeratin-20 Short=CK-20 ;Keratin-20 Short=K20 ;Protein IT;K1C20;	(Human)	17	IKTVVQEVVD	GKVVSSEVKE	410	424
P35900	AAPGLNLGVIMNEMR	Keratin, type I cytoskeletal 20	KRT20;Keratin, type I cytoskeletal 20;Cytokeratin-20 Short=CK-20 ;Keratin-20 Short=K20 ;Protein IT;K1C20;	(Human)	17	LGNTVNVEVD	AAPGLNLGVI	229	424
[truncated: 127 more rows]

## Sheet: Supplementary Table 3
Supplementary Table 3 | N-terminomics TAILS peptides significantly elevated from the ulcerative colitis colon biopsies.
[truncated: 245 more rows]

[truncated: 3 more sheets: Supplementary Table 4, Supplementary Table 5, Supplementary Table 6]
